# Supplementary material for: Association of temporary Environmental Protection Agency regulation suspension with industrial economic viability and local air quality in California, United States
Source: Environ Sci Eur. 2021 Apr 21;33(1):52. doi: 10.1186/s12302-021-00489-9 (PMC8058586; doi:10.1186/s12302-021-00489-9)
Supplement: Supplementary file 12 — Additional file 12. California2019.csv [file 12302_2021_489_MOESM12_ESM.csv]

Date	Source	Site ID	POC	Daily Mean PM2.5 Concentration	UNITS	DAILY_AQI_VALUE	Site Name	DAILY_OBS_COUNT	PERCENT_COMPLETE	AQS_PARAMETER_CODE	AQS_PARAMETER_DESC	CBSA_CODE	CBSA_NAME	STATE_CODE	STATE	COUNTY_CODE	COUNTY	SITE_LATITUDE	SITE_LONGITUDE
01/01/2014	AQS	060010007	3	25.3	ug/m3 LC	79	Livermore	1	100.0000	88101	PM2.5 - Local Conditions	41860	San Francisco-Oakland-Hayward, CA	06	California	001	Alameda	37.687526	-121.784217
01/02/2014	AQS	060010007	3	18.6	ug/m3 LC	65	Livermore	1	100.0000	88101	PM2.5 - Local Conditions	41860	San Francisco-Oakland-Hayward, CA	06	California	001	Alameda	37.687526	-121.784217
01/03/2014	AQS	060010007	3	23.3	ug/m3 LC	75	Livermore	1	100.0000	88101	PM2.5 - Local Conditions	41860	San Francisco-Oakland-Hayward, CA	06	California	001	Alameda	37.687526	-121.784217
01/04/2014	AQS	060010007	3	14.6	ug/m3 LC	56	Livermore	1	100.0000	88101	PM2.5 - Local Conditions	41860	San Francisco-Oakland-Hayward, CA	06	California	001	Alameda	37.687526	-121.784217
01/05/2014	AQS	060010007	3	14.3	ug/m3 LC	56	Livermore	1	100.0000	88101	PM2.5 - Local Conditions	41860	San Francisco-Oakland-Hayward, CA	06	California	001	Alameda	37.687526	-121.784217
01/06/2014	AQS	060010007	3	31.8	ug/m3 LC	92	Livermore	1	100.0000	88101	PM2.5 - Local Conditions	41860	San Francisco-Oakland-Hayward, CA	06	California	001	Alameda	37.687526	-121.784217
01/07/2014	AQS	060010007	3	33.2	ug/m3 LC	95	Livermore	1	100.0000	88101	PM2.5 - Local Conditions	41860	San Francisco-Oakland-Hayward, CA	06	California	001	Alameda	37.687526	-121.784217
01/08/2014	AQS	060010007	3	5.5	ug/m3 LC	23	Livermore	1	100.0000	88101	PM2.5 - Local Conditions	41860	San Francisco-Oakland-Hayward, CA	06	California	001	Alameda	37.687526	-121.784217
01/09/2014	AQS	060010007	3	8.1	ug/m3 LC	34	Livermore	1	100.0000	88101	PM2.5 - Local Conditions	41860	San Francisco-Oakland-Hayward, CA	06	California	001	Alameda	37.687526	-121.784217
01/10/2014	AQS	060010007	3	12.8	ug/m3 LC	52	Livermore	1	100.0000	88101	PM2.5 - Local Conditions	41860	San Francisco-Oakland-Hayward, CA	06	California	001	Alameda	37.687526	-121.784217
01/11/2014	AQS	060010007	3	16.2	ug/m3 LC	60	Livermore	1	100.0000	88101	PM2.5 - Local Conditions	41860	San Francisco-Oakland-Hayward, CA	06	California	001	Alameda	37.687526	-121.784217
01/12/2014	AQS	060010007	3	11	ug/m3 LC	46	Livermore	1	100.0000	88101	PM2.5 - Local Conditions	41860	San Francisco-Oakland-Hayward, CA	06	California	001	Alameda	37.687526	-121.784217
01/13/2014	AQS	060010007	3	5.5	ug/m3 LC	23	Livermore	1	100.0000	88101	PM2.5 - Local Conditions	41860	San Francisco-Oakland-Hayward, CA	06	California	001	Alameda	37.687526	-121.784217
01/14/2014	AQS	060010007	3	7.1	ug/m3 LC	30	Livermore	1	100.0000	88101	PM2.5 - Local Conditions	41860	San Francisco-Oakland-Hayward, CA	06	California	001	Alameda	37.687526	-121.784217
01/15/2014	AQS	060010007	3	12.1	ug/m3 LC	51	Livermore	1	100.0000	88101	PM2.5 - Local Conditions	41860	San Francisco-Oakland-Hayward, CA	06	California	001	Alameda	37.687526	-121.784217
01/16/2014	AQS	060010007	3	20.2	ug/m3 LC	68	Livermore	1	100.0000	88101	PM2.5 - Local Conditions	41860	San Francisco-Oakland-Hayward, CA	06	California	001	Alameda	37.687526	-121.784217
01/17/2014	AQS	060010007	3	28	ug/m3 LC	84	Livermore	1	100.0000	88101	PM2.5 - Local Conditions	41860	San Francisco-Oakland-Hayward, CA	06	California	001	Alameda	37.687526	-121.784217
01/18/2014	AQS	060010007	3	19	ug/m3 LC	66	Livermore	1	100.0000	88101	PM2.5 - Local Conditions	41860	San Francisco-Oakland-Hayward, CA	06	California	001	Alameda	37.687526	-121.784217
01/19/2014	AQS	060010007	3	27	ug/m3 LC	82	Livermore	1	100.0000	88101	PM2.5 - Local Conditions	41860	San Francisco-Oakland-Hayward, CA	06	California	001	Alameda	37.687526	-121.784217
01/20/2014	AQS	060010007	3	19.7	ug/m3 LC	67	Livermore	1	100.0000	88101	PM2.5 - Local Conditions	41860	San Francisco-Oakland-Hayward, CA	06	California	001	Alameda	37.687526	-121.784217
01/21/2014	AQS	060010007	3	12.2	ug/m3 LC	51	Livermore	1	100.0000	88101	PM2.5 - Local Conditions	41860	San Francisco-Oakland-Hayward, CA	06	California	001	Alameda	37.687526	-121.784217
01/22/2014	AQS	060010007	3	10	ug/m3 LC	42	Livermore	1	100.0000	88101	PM2.5 - Local Conditions	41860	San Francisco-Oakland-Hayward, CA	06	California	001	Alameda	37.687526	-121.784217
01/23/2014	AQS	060010007	3	32.7	ug/m3 LC	94	Livermore	1	100.0000	88101	PM2.5 - Local Conditions	41860	San Francisco-Oakland-Hayward, CA	06	California	001	Alameda	37.687526	-121.784217
01/24/2014	AQS	060010007	3	42.9	ug/m3 LC	119	Livermore	1	100.0000	88101	PM2.5 - Local Conditions	41860	San Francisco-Oakland-Hayward, CA	06	California	001	Alameda	37.687526	-121.784217
01/25/2014	AQS	060010007	3	20.5	ug/m3 LC	69	Livermore	1	100.0000	88101	PM2.5 - Local Conditions	41860	San Francisco-Oakland-Hayward, CA	06	California	001	Alameda	37.687526	-121.784217
01/26/2014	AQS	060010007	3	14.3	ug/m3 LC	56	Livermore	1	100.0000	88101	PM2.5 - Local Conditions	41860	San Francisco-Oakland-Hayward, CA	06	California	001	Alameda	37.687526	-121.784217
01/27/2014	AQS	060010007	3	15.8	ug/m3 LC	59	Livermore	1	100.0000	88101	PM2.5 - Local Conditions	41860	San Francisco-Oakland-Hayward, CA	06	California	001	Alameda	37.687526	-121.784217
01/28/2014	AQS	060010007	3	8	ug/m3 LC	33	Livermore	1	100.0000	88101	PM2.5 - Local Conditions	41860	San Francisco-Oakland-Hayward, CA	06	California	001	Alameda	37.687526	-121.784217
02/12/2014	AQS	060010007	3	7.2	ug/m3 LC	30	Livermore	1	100.0000	88101	PM2.5 - Local Conditions	41860	San Francisco-Oakland-Hayward, CA	06	California	001	Alameda	37.687526	-121.784217
02/13/2014	AQS	060010007	3	6.6	ug/m3 LC	28	Livermore	1	100.0000	88101	PM2.5 - Local Conditions	41860	San Francisco-Oakland-Hayward, CA	06	California	001	Alameda	37.687526	-121.784217
02/14/2014	AQS	060010007	3	4.6	ug/m3 LC	19	Livermore	1	100.0000	88101	PM2.5 - Local Conditions	41860	San Francisco-Oakland-Hayward, CA	06	California	001	Alameda	37.687526	-121.784217
02/15/2014	AQS	060010007	3	5.6	ug/m3 LC	23	Livermore	1	100.0000	88101	PM2.5 - Local Conditions	41860	San Francisco-Oakland-Hayward, CA	06	California	001	Alameda	37.687526	-121.784217
02/16/2014	AQS	060010007	3	4.7	ug/m3 LC	20	Livermore	1	100.0000	88101	PM2.5 - Local Conditions	41860	San Francisco-Oakland-Hayward, CA	06	California	001	Alameda	37.687526	-121.784217
02/17/2014	AQS	060010007	3	5.2	ug/m3 LC	22	Livermore	1	100.0000	88101	PM2.5 - Local Conditions	41860	San Francisco-Oakland-Hayward, CA	06	California	001	Alameda	37.687526	-121.784217
02/18/2014	AQS	060010007	3	5	ug/m3 LC	21	Livermore	1	100.0000	88101	PM2.5 - Local Conditions	41860	San Francisco-Oakland-Hayward, CA	06	California	001	Alameda	37.687526	-121.784217
02/19/2014	AQS	060010007	3	3.1	ug/m3 LC	13	Livermore	1	100.0000	88101	PM2.5 - Local Conditions	41860	San Francisco-Oakland-Hayward, CA	06	California	001	Alameda	37.687526	-121.784217
02/20/2014	AQS	060010007	3	4.8	ug/m3 LC	20	Livermore	1	100.0000	88101	PM2.5 - Local Conditions	41860	San Francisco-Oakland-Hayward, CA	06	California	001	Alameda	37.687526	-121.784217
02/21/2014	AQS	060010007	3	6.4	ug/m3 LC	27	Livermore	1	100.0000	88101	PM2.5 - Local Conditions	41860	San Francisco-Oakland-Hayward, CA	06	California	001	Alameda	37.687526	-121.784217
02/22/2014	AQS	060010007	3	6	ug/m3 LC	25	Livermore	1	100.0000	88101	PM2.5 - Local Conditions	41860	San Francisco-Oakland-Hayward, CA	06	California	001	Alameda	37.687526	-121.784217
02/23/2014	AQS	060010007	3	9	ug/m3 LC	38	Livermore	1	100.0000	88101	PM2.5 - Local Conditions	41860	San Francisco-Oakland-Hayward, CA	06	California	001	Alameda	37.687526	-121.784217
02/24/2014	AQS	060010007	3	7.1	ug/m3 LC	30	Livermore	1	100.0000	88101	PM2.5 - Local Conditions	41860	San Francisco-Oakland-Hayward, CA	06	California	001	Alameda	37.687526	-121.784217
02/25/2014	AQS	060010007	3	11	ug/m3 LC	46	Livermore	1	100.0000	88101	PM2.5 - Local Conditions	41860	San Francisco-Oakland-Hayward, CA	06	California	001	Alameda	37.687526	-121.784217
02/26/2014	AQS	060010007	3	7.6	ug/m3 LC	32	Livermore	1	100.0000	88101	PM2.5 - Local Conditions	41860	San Francisco-Oakland-Hayward, CA	06	California	001	Alameda	37.687526	-121.784217
02/27/2014	AQS	060010007	3	2.7	ug/m3 LC	11	Livermore	1	100.0000	88101	PM2.5 - Local Conditions	41860	San Francisco-Oakland-Hayward, CA	06	California	001	Alameda	37.687526	-121.784217
02/28/2014	AQS	060010007	3	1.3	ug/m3 LC	5	Livermore	1	100.0000	88101	PM2.5 - Local Conditions	41860	San Francisco-Oakland-Hayward, CA	06	California	001	Alameda	37.687526	-121.784217
03/01/2014	AQS	060010007	3	3	ug/m3 LC	13	Livermore	1	100.0000	88101	PM2.5 - Local Conditions	41860	San Francisco-Oakland-Hayward, CA	06	California	001	Alameda	37.687526	-121.784217
03/02/2014	AQS	060010007	3	5.3	ug/m3 LC	22	Livermore	1	100.0000	88101	PM2.5 - Local Conditions	41860	San Francisco-Oakland-Hayward, CA	06	California	001	Alameda	37.687526	-121.784217
03/03/2014	AQS	060010007	3	5.5	ug/m3 LC	23	Livermore	1	100.0000	88101	PM2.5 - Local Conditions	41860	San Francisco-Oakland-Hayward, CA	06	California	001	Alameda	37.687526	-121.784217
03/04/2014	AQS	060010007	3	4.6	ug/m3 LC	19	Livermore	1	100.0000	88101	PM2.5 - Local Conditions	41860	San Francisco-Oakland-Hayward, CA	06	California	001	Alameda	37.687526	-121.784217
03/05/2014	AQS	060010007	3	4	ug/m3 LC	17	Livermore	1	100.0000	88101	PM2.5 - Local Conditions	41860	San Francisco-Oakland-Hayward, CA	06	California	001	Alameda	37.687526	-121.784217
03/06/2014	AQS	060010007	3	5.2	ug/m3 LC	22	Livermore	1	100.0000	88101	PM2.5 - Local Conditions	41860	San Francisco-Oakland-Hayward, CA	06	California	001	Alameda	37.687526	-121.784217
03/07/2014	AQS	060010007	3	4	ug/m3 LC	17	Livermore	1	100.0000	88101	PM2.5 - Local Conditions	41860	San Francisco-Oakland-Hayward, CA	06	California	001	Alameda	37.687526	-121.784217
03/08/2014	AQS	060010007	3	5.5	ug/m3 LC	23	Livermore	1	100.0000	88101	PM2.5 - Local Conditions	41860	San Francisco-Oakland-Hayward, CA	06	California	001	Alameda	37.687526	-121.784217
03/09/2014	AQS	060010007	3	10.1	ug/m3 LC	42	Livermore	1	100.0000	88101	PM2.5 - Local Conditions	41860	San Francisco-Oakland-Hayward, CA	06	California	001	Alameda	37.687526	-121.784217
03/10/2014	AQS	060010007	3	2.4	ug/m3 LC	10	Livermore	1	100.0000	88101	PM2.5 - Local Conditions	41860	San Francisco-Oakland-Hayward, CA	06	California	001	Alameda	37.687526	-121.784217
03/11/2014	AQS	060010007	3	1.2	ug/m3 LC	5	Livermore	1	100.0000	88101	PM2.5 - Local Conditions	41860	San Francisco-Oakland-Hayward, CA	06	California	001	Alameda	37.687526	-121.784217
03/12/2014	AQS	060010007	3	0.6	ug/m3 LC	3	Livermore	1	100.0000	88101	PM2.5 - Local Conditions	41860	San Francisco-Oakland-Hayward, CA	06	California	001	Alameda	37.687526	-121.784217
03/13/2014	AQS	060010007	3	2.5	ug/m3 LC	10	Livermore	1	100.0000	88101	PM2.5 - Local Conditions	41860	San Francisco-Oakland-Hayward, CA	06	California	001	Alameda	37.687526	-121.784217
03/14/2014	AQS	060010007	3	10	ug/m3 LC	42	Livermore	1	100.0000	88101	PM2.5 - Local Conditions	41860	San Francisco-Oakland-Hayward, CA	06	California	001	Alameda	37.687526	-121.784217
03/15/2014	AQS	060010007	3	7	ug/m3 LC	29	Livermore	1	100.0000	88101	PM2.5 - Local Conditions	41860	San Francisco-Oakland-Hayward, CA	06	California	001	Alameda	37.687526	-121.784217
03/16/2014	AQS	060010007	3	6.7	ug/m3 LC	28	Livermore	1	100.0000	88101	PM2.5 - Local Conditions	41860	San Francisco-Oakland-Hayward, CA	06	California	001	Alameda	37.687526	-121.784217
03/17/2014	AQS	060010007	3	1.5	ug/m3 LC	6	Livermore	1	100.0000	88101	PM2.5 - Local Conditions	41860	San Francisco-Oakland-Hayward, CA	06	California	001	Alameda	37.687526	-121.784217
03/18/2014	AQS	060010007	3	1.6	ug/m3 LC	7	Livermore	1	100.0000	88101	PM2.5 - Local Conditions	41860	San Francisco-Oakland-Hayward, CA	06	California	001	Alameda	37.687526	-121.784217
03/19/2014	AQS	060010007	3	3.5	ug/m3 LC	15	Livermore	1	100.0000	88101	PM2.5 - Local Conditions	41860	San Francisco-Oakland-Hayward, CA	06	California	001	Alameda	37.687526	-121.784217
03/20/2014	AQS	060010007	3	6.9	ug/m3 LC	29	Livermore	1	100.0000	88101	PM2.5 - Local Conditions	41860	San Francisco-Oakland-Hayward, CA	06	California	001	Alameda	37.687526	-121.784217
03/21/2014	AQS	060010007	3	10.9	ug/m3 LC	45	Livermore	1	100.0000	88101	PM2.5 - Local Conditions	41860	San Francisco-Oakland-Hayward, CA	06	California	001	Alameda	37.687526	-121.784217
03/22/2014	AQS	060010007	3	11.7	ug/m3 LC	49	Livermore	1	100.0000	88101	PM2.5 - Local Conditions	41860	San Francisco-Oakland-Hayward, CA	06	California	001	Alameda	37.687526	-121.784217
03/23/2014	AQS	060010007	3	9.5	ug/m3 LC	40	Livermore	1	100.0000	88101	PM2.5 - Local Conditions	41860	San Francisco-Oakland-Hayward, CA	06	California	001	Alameda	37.687526	-121.784217
03/24/2014	AQS	060010007	3	9	ug/m3 LC	38	Livermore	1	100.0000	88101	PM2.5 - Local Conditions	41860	San Francisco-Oakland-Hayward, CA	06	California	001	Alameda	37.687526	-121.784217
03/25/2014	AQS	060010007	3	4.8	ug/m3 LC	20	Livermore	1	100.0000	88101	PM2.5 - Local Conditions	41860	San Francisco-Oakland-Hayward, CA	06	California	001	Alameda	37.687526	-121.784217
03/26/2014	AQS	060010007	3	3.8	ug/m3 LC	16	Livermore	1	100.0000	88101	PM2.5 - Local Conditions	41860	San Francisco-Oakland-Hayward, CA	06	California	001	Alameda	37.687526	-121.784217
03/27/2014	AQS	060010007	3	7.1	ug/m3 LC	30	Livermore	1	100.0000	88101	PM2.5 - Local Conditions	41860	San Francisco-Oakland-Hayward, CA	06	California	001	Alameda	37.687526	-121.784217
03/28/2014	AQS	060010007	3	4.4	ug/m3 LC	18	Livermore	1	100.0000	88101	PM2.5 - Local Conditions	41860	San Francisco-Oakland-Hayward, CA	06	California	001	Alameda	37.687526	-121.784217
03/29/2014	AQS	060010007	3	2.1	ug/m3 LC	9	Livermore	1	100.0000	88101	PM2.5 - Local Conditions	41860	San Francisco-Oakland-Hayward, CA	06	California	001	Alameda	37.687526	-121.784217
03/30/2014	AQS	060010007	3	3	ug/m3 LC	13	Livermore	1	100.0000	88101	PM2.5 - Local Conditions	41860	San Francisco-Oakland-Hayward, CA	06	California	001	Alameda	37.687526	-121.784217
03/31/2014	AQS	060010007	3	3.6	ug/m3 LC	15	Livermore	1	100.0000	88101	PM2.5 - Local Conditions	41860	San Francisco-Oakland-Hayward, CA	06	California	001	Alameda	37.687526	-121.784217
04/01/2014	AQS	060010007	3	3	ug/m3 LC	13	Livermore	1	100.0000	88101	PM2.5 - Local Conditions	41860	San Francisco-Oakland-Hayward, CA	06	California	001	Alameda	37.687526	-121.784217
04/02/2014	AQS	060010007	3	3.3	ug/m3 LC	14	Livermore	1	100.0000	88101	PM2.5 - Local Conditions	41860	San Francisco-Oakland-Hayward, CA	06	California	001	Alameda	37.687526	-121.784217
04/03/2014	AQS	060010007	3	4	ug/m3 LC	17	Livermore	1	100.0000	88101	PM2.5 - Local Conditions	41860	San Francisco-Oakland-Hayward, CA	06	California	001	Alameda	37.687526	-121.784217
04/04/2014	AQS	060010007	3	1.8	ug/m3 LC	8	Livermore	1	100.0000	88101	PM2.5 - Local Conditions	41860	San Francisco-Oakland-Hayward, CA	06	California	001	Alameda	37.687526	-121.784217
04/05/2014	AQS	060010007	3	5.2	ug/m3 LC	22	Livermore	1	100.0000	88101	PM2.5 - Local Conditions	41860	San Francisco-Oakland-Hayward, CA	06	California	001	Alameda	37.687526	-121.784217
04/06/2014	AQS	060010007	3	6	ug/m3 LC	25	Livermore	1	100.0000	88101	PM2.5 - Local Conditions	41860	San Francisco-Oakland-Hayward, CA	06	California	001	Alameda	37.687526	-121.784217
04/07/2014	AQS	060010007	3	5.6	ug/m3 LC	23	Livermore	1	100.0000	88101	PM2.5 - Local Conditions	41860	San Francisco-Oakland-Hayward, CA	06	California	001	Alameda	37.687526	-121.784217
04/08/2014	AQS	060010007	3	9.3	ug/m3 LC	39	Livermore	1	100.0000	88101	PM2.5 - Local Conditions	41860	San Francisco-Oakland-Hayward, CA	06	California	001	Alameda	37.687526	-121.784217
04/09/2014	AQS	060010007	3	9.2	ug/m3 LC	38	Livermore	1	100.0000	88101	PM2.5 - Local Conditions	41860	San Francisco-Oakland-Hayward, CA	06	California	001	Alameda	37.687526	-121.784217
04/10/2014	AQS	060010007	3	4.8	ug/m3 LC	20	Livermore	1	100.0000	88101	PM2.5 - Local Conditions	41860	San Francisco-Oakland-Hayward, CA	06	California	001	Alameda	37.687526	-121.784217
04/11/2014	AQS	060010007	3	10.3	ug/m3 LC	43	Livermore	1	100.0000	88101	PM2.5 - Local Conditions	41860	San Francisco-Oakland-Hayward, CA	06	California	001	Alameda	37.687526	-121.784217
04/12/2014	AQS	060010007	3	8.6	ug/m3 LC	36	Livermore	1	100.0000	88101	PM2.5 - Local Conditions	41860	San Francisco-Oakland-Hayward, CA	06	California	001	Alameda	37.687526	-121.784217
04/13/2014	AQS	060010007	3	9	ug/m3 LC	38	Livermore	1	100.0000	88101	PM2.5 - Local Conditions	41860	San Francisco-Oakland-Hayward, CA	06	California	001	Alameda	37.687526	-121.784217
04/14/2014	AQS	060010007	3	10.1	ug/m3 LC	42	Livermore	1	100.0000	88101	PM2.5 - Local Conditions	41860	San Francisco-Oakland-Hayward, CA	06	California	001	Alameda	37.687526	-121.784217
04/15/2014	AQS	060010007	3	12.2	ug/m3 LC	51	Livermore	1	100.0000	88101	PM2.5 - Local Conditions	41860	San Francisco-Oakland-Hayward, CA	06	California	001	Alameda	37.687526	-121.784217
04/16/2014	AQS	060010007	3	10	ug/m3 LC	42	Livermore	1	100.0000	88101	PM2.5 - Local Conditions	41860	San Francisco-Oakland-Hayward, CA	06	California	001	Alameda	37.687526	-121.784217
04/17/2014	AQS	060010007	3	10.5	ug/m3 LC	44	Livermore	1	100.0000	88101	PM2.5 - Local Conditions	41860	San Francisco-Oakland-Hayward, CA	06	California	001	Alameda	37.687526	-121.784217
04/18/2014	AQS	060010007	3	7	ug/m3 LC	29	Livermore	1	100.0000	88101	PM2.5 - Local Conditions	41860	San Francisco-Oakland-Hayward, CA	06	California	001	Alameda	37.687526	-121.784217
04/19/2014	AQS	060010007	3	5	ug/m3 LC	21	Livermore	1	100.0000	88101	PM2.5 - Local Conditions	41860	San Francisco-Oakland-Hayward, CA	06	California	001	Alameda	37.687526	-121.784217
04/20/2014	AQS	060010007	3	5.2	ug/m3 LC	22	Livermore	1	100.0000	88101	PM2.5 - Local Conditions	41860	San Francisco-Oakland-Hayward, CA	06	California	001	Alameda	37.687526	-121.784217
04/21/2014	AQS	060010007	3	10.7	ug/m3 LC	45	Livermore	1	100.0000	88101	PM2.5 - Local Conditions	41860	San Francisco-Oakland-Hayward, CA	06	California	001	Alameda	37.687526	-121.784217
04/22/2014	AQS	060010007	3	3.7	ug/m3 LC	15	Livermore	1	100.0000	88101	PM2.5 - Local Conditions	41860	San Francisco-Oakland-Hayward, CA	06	California	001	Alameda	37.687526	-121.784217
04/23/2014	AQS	060010007	3	4.1	ug/m3 LC	17	Livermore	1	100.0000	88101	PM2.5 - Local Conditions	41860	San Francisco-Oakland-Hayward, CA	06	California	001	Alameda	37.687526	-121.784217
04/24/2014	AQS	060010007	3	6	ug/m3 LC	25	Livermore	1	100.0000	88101	PM2.5 - Local Conditions	41860	San Francisco-Oakland-Hayward, CA	06	California	001	Alameda	37.687526	-121.784217
04/25/2014	AQS	060010007	3	2.7	ug/m3 LC	11	Livermore	1	100.0000	88101	PM2.5 - Local Conditions	41860	San Francisco-Oakland-Hayward, CA	06	California	001	Alameda	37.687526	-121.784217
04/26/2014	AQS	060010007	3	2.2	ug/m3 LC	9	Livermore	1	100.0000	88101	PM2.5 - Local Conditions	41860	San Francisco-Oakland-Hayward, CA	06	California	001	Alameda	37.687526	-121.784217
04/27/2014	AQS	060010007	3	3.6	ug/m3 LC	15	Livermore	1	100.0000	88101	PM2.5 - Local Conditions	41860	San Francisco-Oakland-Hayward, CA	06	California	001	Alameda	37.687526	-121.784217
04/28/2014	AQS	060010007	3	7.9	ug/m3 LC	33	Livermore	1	100.0000	88101	PM2.5 - Local Conditions	41860	San Francisco-Oakland-Hayward, CA	06	California	001	Alameda	37.687526	-121.784217
04/29/2014	AQS	060010007	3	7.6	ug/m3 LC	32	Livermore	1	100.0000	88101	PM2.5 - Local Conditions	41860	San Francisco-Oakland-Hayward, CA	06	California	001	Alameda	37.687526	-121.784217
04/30/2014	AQS	060010007	3	9.8	ug/m3 LC	41	Livermore	1	100.0000	88101	PM2.5 - Local Conditions	41860	San Francisco-Oakland-Hayward, CA	06	California	001	Alameda	37.687526	-121.784217
05/01/2014	AQS	060010007	3	10.2	ug/m3 LC	43	Livermore	1	100.0000	88101	PM2.5 - Local Conditions	41860	San Francisco-Oakland-Hayward, CA	06	California	001	Alameda	37.687526	-121.784217
05/02/2014	AQS	060010007	3	5.2	ug/m3 LC	22	Livermore	1	100.0000	88101	PM2.5 - Local Conditions	41860	San Francisco-Oakland-Hayward, CA	06	California	001	Alameda	37.687526	-121.784217
05/03/2014	AQS	060010007	3	3.5	ug/m3 LC	15	Livermore	1	100.0000	88101	PM2.5 - Local Conditions	41860	San Francisco-Oakland-Hayward, CA	06	California	001	Alameda	37.687526	-121.784217
05/04/2014	AQS	060010007	3	1.3	ug/m3 LC	5	Livermore	1	100.0000	88101	PM2.5 - Local Conditions	41860	San Francisco-Oakland-Hayward, CA	06	California	001	Alameda	37.687526	-121.784217
05/05/2014	AQS	060010007	3	4.3	ug/m3 LC	18	Livermore	1	100.0000	88101	PM2.5 - Local Conditions	41860	San Francisco-Oakland-Hayward, CA	06	California	001	Alameda	37.687526	-121.784217
05/06/2014	AQS	060010007	3	5.8	ug/m3 LC	24	Livermore	1	100.0000	88101	PM2.5 - Local Conditions	41860	San Francisco-Oakland-Hayward, CA	06	California	001	Alameda	37.687526	-121.784217
05/07/2014	AQS	060010007	3	6.5	ug/m3 LC	27	Livermore	1	100.0000	88101	PM2.5 - Local Conditions	41860	San Francisco-Oakland-Hayward, CA	06	California	001	Alameda	37.687526	-121.784217
05/08/2014	AQS	060010007	3	3.8	ug/m3 LC	16	Livermore	1	100.0000	88101	PM2.5 - Local Conditions	41860	San Francisco-Oakland-Hayward, CA	06	California	001	Alameda	37.687526	-121.784217
05/09/2014	AQS	060010007	3	0.7	ug/m3 LC	3	Livermore	1	100.0000	88101	PM2.5 - Local Conditions	41860	San Francisco-Oakland-Hayward, CA	06	California	001	Alameda	37.687526	-121.784217
05/10/2014	AQS	060010007	3	1.5	ug/m3 LC	6	Livermore	1	100.0000	88101	PM2.5 - Local Conditions	41860	San Francisco-Oakland-Hayward, CA	06	California	001	Alameda	37.687526	-121.784217
05/11/2014	AQS	060010007	3	0.2	ug/m3 LC	1	Livermore	1	100.0000	88101	PM2.5 - Local Conditions	41860	San Francisco-Oakland-Hayward, CA	06	California	001	Alameda	37.687526	-121.784217
05/12/2014	AQS	060010007	3	1.5	ug/m3 LC	6	Livermore	1	100.0000	88101	PM2.5 - Local Conditions	41860	San Francisco-Oakland-Hayward, CA	06	California	001	Alameda	37.687526	-121.784217
05/13/2014	AQS	060010007	3	4.1	ug/m3 LC	17	Livermore	1	100.0000	88101	PM2.5 - Local Conditions	41860	San Francisco-Oakland-Hayward, CA	06	California	001	Alameda	37.687526	-121.784217
05/14/2014	AQS	060010007	3	6.4	ug/m3 LC	27	Livermore	1	100.0000	88101	PM2.5 - Local Conditions	41860	San Francisco-Oakland-Hayward, CA	06	California	001	Alameda	37.687526	-121.784217
05/15/2014	AQS	060010007	3	5.8	ug/m3 LC	24	Livermore	1	100.0000	88101	PM2.5 - Local Conditions	41860	San Francisco-Oakland-Hayward, CA	06	California	001	Alameda	37.687526	-121.784217
05/16/2014	AQS	060010007	3	4.9	ug/m3 LC	20	Livermore	1	100.0000	88101	PM2.5 - Local Conditions	41860	San Francisco-Oakland-Hayward, CA	06	California	001	Alameda	37.687526	-121.784217
05/17/2014	AQS	060010007	3	4.2	ug/m3 LC	18	Livermore	1	100.0000	88101	PM2.5 - Local Conditions	41860	San Francisco-Oakland-Hayward, CA	06	California	001	Alameda	37.687526	-121.784217
05/18/2014	AQS	060010007	3	1.8	ug/m3 LC	8	Livermore	1	100.0000	88101	PM2.5 - Local Conditions	41860	San Francisco-Oakland-Hayward, CA	06	California	001	Alameda	37.687526	-121.784217
05/19/2014	AQS	060010007	3	0.8	ug/m3 LC	3	Livermore	1	100.0000	88101	PM2.5 - Local Conditions	41860	San Francisco-Oakland-Hayward, CA	06	California	001	Alameda	37.687526	-121.784217
05/20/2014	AQS	060010007	3	1.8	ug/m3 LC	8	Livermore	1	100.0000	88101	PM2.5 - Local Conditions	41860	San Francisco-Oakland-Hayward, CA	06	California	001	Alameda	37.687526	-121.784217
05/21/2014	AQS	060010007	3	6.3	ug/m3 LC	26	Livermore	1	100.0000	88101	PM2.5 - Local Conditions	41860	San Francisco-Oakland-Hayward, CA	06	California	001	Alameda	37.687526	-121.784217
05/22/2014	AQS	060010007	3	7.3	ug/m3 LC	30	Livermore	1	100.0000	88101	PM2.5 - Local Conditions	41860	San Francisco-Oakland-Hayward, CA	06	California	001	Alameda	37.687526	-121.784217
05/23/2014	AQS	060010007	3	3.2	ug/m3 LC	13	Livermore	1	100.0000	88101	PM2.5 - Local Conditions	41860	San Francisco-Oakland-Hayward, CA	06	California	001	Alameda	37.687526	-121.784217
05/24/2014	AQS	060010007	3	5	ug/m3 LC	21	Livermore	1	100.0000	88101	PM2.5 - Local Conditions	41860	San Francisco-Oakland-Hayward, CA	06	California	001	Alameda	37.687526	-121.784217
05/25/2014	AQS	060010007	3	7.5	ug/m3 LC	31	Livermore	1	100.0000	88101	PM2.5 - Local Conditions	41860	San Francisco-Oakland-Hayward, CA	06	California	001	Alameda	37.687526	-121.784217
05/26/2014	AQS	060010007	3	4.6	ug/m3 LC	19	Livermore	1	100.0000	88101	PM2.5 - Local Conditions	41860	San Francisco-Oakland-Hayward, CA	06	California	001	Alameda	37.687526	-121.784217
05/27/2014	AQS	060010007	3	5.8	ug/m3 LC	24	Livermore	1	100.0000	88101	PM2.5 - Local Conditions	41860	San Francisco-Oakland-Hayward, CA	06	California	001	Alameda	37.687526	-121.784217
05/28/2014	AQS	060010007	3	4.9	ug/m3 LC	20	Livermore	1	100.0000	88101	PM2.5 - Local Conditions	41860	San Francisco-Oakland-Hayward, CA	06	California	001	Alameda	37.687526	-121.784217
05/29/2014	AQS	060010007	3	4	ug/m3 LC	17	Livermore	1	100.0000	88101	PM2.5 - Local Conditions	41860	San Francisco-Oakland-Hayward, CA	06	California	001	Alameda	37.687526	-121.784217
05/30/2014	AQS	060010007	3	11.1	ug/m3 LC	46	Livermore	1	100.0000	88101	PM2.5 - Local Conditions	41860	San Francisco-Oakland-Hayward, CA	06	California	001	Alameda	37.687526	-121.784217
05/31/2014	AQS	060010007	3	7.6	ug/m3 LC	32	Livermore	1	100.0000	88101	PM2.5 - Local Conditions	41860	San Francisco-Oakland-Hayward, CA	06	California	001	Alameda	37.687526	-121.784217
06/01/2014	AQS	060010007	3	7	ug/m3 LC	29	Livermore	1	100.0000	88101	PM2.5 - Local Conditions	41860	San Francisco-Oakland-Hayward, CA	06	California	001	Alameda	37.687526	-121.784217
06/02/2014	AQS	060010007	3	3.5	ug/m3 LC	15	Livermore	1	100.0000	88101	PM2.5 - Local Conditions	41860	San Francisco-Oakland-Hayward, CA	06	California	001	Alameda	37.687526	-121.784217
06/03/2014	AQS	060010007	3	1.2	ug/m3 LC	5	Livermore	1	100.0000	88101	PM2.5 - Local Conditions	41860	San Francisco-Oakland-Hayward, CA	06	California	001	Alameda	37.687526	-121.784217
06/04/2014	AQS	060010007	3	6.9	ug/m3 LC	29	Livermore	1	100.0000	88101	PM2.5 - Local Conditions	41860	San Francisco-Oakland-Hayward, CA	06	California	001	Alameda	37.687526	-121.784217
06/05/2014	AQS	060010007	3	8	ug/m3 LC	33	Livermore	1	100.0000	88101	PM2.5 - Local Conditions	41860	San Francisco-Oakland-Hayward, CA	06	California	001	Alameda	37.687526	-121.784217
06/06/2014	AQS	060010007	3	12.2	ug/m3 LC	51	Livermore	1	100.0000	88101	PM2.5 - Local Conditions	41860	San Francisco-Oakland-Hayward, CA	06	California	001	Alameda	37.687526	-121.784217
06/07/2014	AQS	060010007	3	11.7	ug/m3 LC	49	Livermore	1	100.0000	88101	PM2.5 - Local Conditions	41860	San Francisco-Oakland-Hayward, CA	06	California	001	Alameda	37.687526	-121.784217
06/08/2014	AQS	060010007	3	9.6	ug/m3 LC	40	Livermore	1	100.0000	88101	PM2.5 - Local Conditions	41860	San Francisco-Oakland-Hayward, CA	06	California	001	Alameda	37.687526	-121.784217
06/09/2014	AQS	060010007	3	8.5	ug/m3 LC	35	Livermore	1	100.0000	88101	PM2.5 - Local Conditions	41860	San Francisco-Oakland-Hayward, CA	06	California	001	Alameda	37.687526	-121.784217
06/10/2014	AQS	060010007	3	8.5	ug/m3 LC	35	Livermore	1	100.0000	88101	PM2.5 - Local Conditions	41860	San Francisco-Oakland-Hayward, CA	06	California	001	Alameda	37.687526	-121.784217
06/11/2014	AQS	060010007	3	3.2	ug/m3 LC	13	Livermore	1	100.0000	88101	PM2.5 - Local Conditions	41860	San Francisco-Oakland-Hayward, CA	06	California	001	Alameda	37.687526	-121.784217
06/12/2014	AQS	060010007	3	2.8	ug/m3 LC	12	Livermore	1	100.0000	88101	PM2.5 - Local Conditions	41860	San Francisco-Oakland-Hayward, CA	06	California	001	Alameda	37.687526	-121.784217
06/13/2014	AQS	060010007	3	4.9	ug/m3 LC	20	Livermore	1	100.0000	88101	PM2.5 - Local Conditions	41860	San Francisco-Oakland-Hayward, CA	06	California	001	Alameda	37.687526	-121.784217
06/14/2014	AQS	060010007	3	5.5	ug/m3 LC	23	Livermore	1	100.0000	88101	PM2.5 - Local Conditions	41860	San Francisco-Oakland-Hayward, CA	06	California	001	Alameda	37.687526	-121.784217
06/15/2014	AQS	060010007	3	9	ug/m3 LC	38	Livermore	1	100.0000	88101	PM2.5 - Local Conditions	41860	San Francisco-Oakland-Hayward, CA	06	California	001	Alameda	37.687526	-121.784217
06/16/2014	AQS	060010007	3	5.2	ug/m3 LC	22	Livermore	1	100.0000	88101	PM2.5 - Local Conditions	41860	San Francisco-Oakland-Hayward, CA	06	California	001	Alameda	37.687526	-121.784217
06/17/2014	AQS	060010007	3	3.2	ug/m3 LC	13	Livermore	1	100.0000	88101	PM2.5 - Local Conditions	41860	San Francisco-Oakland-Hayward, CA	06	California	001	Alameda	37.687526	-121.784217
06/18/2014	AQS	060010007	3	2.3	ug/m3 LC	10	Livermore	1	100.0000	88101	PM2.5 - Local Conditions	41860	San Francisco-Oakland-Hayward, CA	06	California	001	Alameda	37.687526	-121.784217
06/19/2014	AQS	060010007	3	4.5	ug/m3 LC	19	Livermore	1	100.0000	88101	PM2.5 - Local Conditions	41860	San Francisco-Oakland-Hayward, CA	06	California	001	Alameda	37.687526	-121.784217
06/20/2014	AQS	060010007	3	4.3	ug/m3 LC	18	Livermore	1	100.0000	88101	PM2.5 - Local Conditions	41860	San Francisco-Oakland-Hayward, CA	06	California	001	Alameda	37.687526	-121.784217
06/21/2014	AQS	060010007	3	7.5	ug/m3 LC	31	Livermore	1	100.0000	88101	PM2.5 - Local Conditions	41860	San Francisco-Oakland-Hayward, CA	06	California	001	Alameda	37.687526	-121.784217
06/22/2014	AQS	060010007	3	7.8	ug/m3 LC	33	Livermore	1	100.0000	88101	PM2.5 - Local Conditions	41860	San Francisco-Oakland-Hayward, CA	06	California	001	Alameda	37.687526	-121.784217
06/23/2014	AQS	060010007	3	7	ug/m3 LC	29	Livermore	1	100.0000	88101	PM2.5 - Local Conditions	41860	San Francisco-Oakland-Hayward, CA	06	California	001	Alameda	37.687526	-121.784217
06/24/2014	AQS	060010007	3	4.1	ug/m3 LC	17	Livermore	1	100.0000	88101	PM2.5 - Local Conditions	41860	San Francisco-Oakland-Hayward, CA	06	California	001	Alameda	37.687526	-121.784217
06/25/2014	AQS	060010007	3	-0.7	ug/m3 LC	0	Livermore	1	100.0000	88101	PM2.5 - Local Conditions	41860	San Francisco-Oakland-Hayward, CA	06	California	001	Alameda	37.687526	-121.784217
06/26/2014	AQS	060010007	3	-0.2	ug/m3 LC	0	Livermore	1	100.0000	88101	PM2.5 - Local Conditions	41860	San Francisco-Oakland-Hayward, CA	06	California	001	Alameda	37.687526	-121.784217
06/27/2014	AQS	060010007	3	-0.4	ug/m3 LC	0	Livermore	1	100.0000	88101	PM2.5 - Local Conditions	41860	San Francisco-Oakland-Hayward, CA	06	California	001	Alameda	37.687526	-121.784217
06/28/2014	AQS	060010007	3	1.7	ug/m3 LC	7	Livermore	1	100.0000	88101	PM2.5 - Local Conditions	41860	San Francisco-Oakland-Hayward, CA	06	California	001	Alameda	37.687526	-121.784217
06/29/2014	AQS	060010007	3	2.9	ug/m3 LC	12	Livermore	1	100.0000	88101	PM2.5 - Local Conditions	41860	San Francisco-Oakland-Hayward, CA	06	California	001	Alameda	37.687526	-121.784217
06/30/2014	AQS	060010007	3	6.5	ug/m3 LC	27	Livermore	1	100.0000	88101	PM2.5 - Local Conditions	41860	San Francisco-Oakland-Hayward, CA	06	California	001	Alameda	37.687526	-121.784217
07/01/2014	AQS	060010007	3	6.9	ug/m3 LC	29	Livermore	1	100.0000	88101	PM2.5 - Local Conditions	41860	San Francisco-Oakland-Hayward, CA	06	California	001	Alameda	37.687526	-121.784217
07/02/2014	AQS	060010007	3	4.4	ug/m3 LC	18	Livermore	1	100.0000	88101	PM2.5 - Local Conditions	41860	San Francisco-Oakland-Hayward, CA	06	California	001	Alameda	37.687526	-121.784217
07/03/2014	AQS	060010007	3	6.5	ug/m3 LC	27	Livermore	1	100.0000	88101	PM2.5 - Local Conditions	41860	San Francisco-Oakland-Hayward, CA	06	California	001	Alameda	37.687526	-121.784217
07/04/2014	AQS	060010007	3	9.6	ug/m3 LC	40	Livermore	1	100.0000	88101	PM2.5 - Local Conditions	41860	San Francisco-Oakland-Hayward, CA	06	California	001	Alameda	37.687526	-121.784217
07/05/2014	AQS	060010007	3	5.9	ug/m3 LC	25	Livermore	1	100.0000	88101	PM2.5 - Local Conditions	41860	San Francisco-Oakland-Hayward, CA	06	California	001	Alameda	37.687526	-121.784217
07/06/2014	AQS	060010007	3	1.4	ug/m3 LC	6	Livermore	1	100.0000	88101	PM2.5 - Local Conditions	41860	San Francisco-Oakland-Hayward, CA	06	California	001	Alameda	37.687526	-121.784217
07/07/2014	AQS	060010007	3	5.7	ug/m3 LC	24	Livermore	1	100.0000	88101	PM2.5 - Local Conditions	41860	San Francisco-Oakland-Hayward, CA	06	California	001	Alameda	37.687526	-121.784217
07/08/2014	AQS	060010007	3	3.5	ug/m3 LC	15	Livermore	1	100.0000	88101	PM2.5 - Local Conditions	41860	San Francisco-Oakland-Hayward, CA	06	California	001	Alameda	37.687526	-121.784217
07/09/2014	AQS	060010007	3	3.8	ug/m3 LC	16	Livermore	1	100.0000	88101	PM2.5 - Local Conditions	41860	San Francisco-Oakland-Hayward, CA	06	California	001	Alameda	37.687526	-121.784217
07/10/2014	AQS	060010007	3	0.9	ug/m3 LC	4	Livermore	1	100.0000	88101	PM2.5 - Local Conditions	41860	San Francisco-Oakland-Hayward, CA	06	California	001	Alameda	37.687526	-121.784217
07/11/2014	AQS	060010007	3	0.5	ug/m3 LC	2	Livermore	1	100.0000	88101	PM2.5 - Local Conditions	41860	San Francisco-Oakland-Hayward, CA	06	California	001	Alameda	37.687526	-121.784217
07/12/2014	AQS	060010007	3	1	ug/m3 LC	4	Livermore	1	100.0000	88101	PM2.5 - Local Conditions	41860	San Francisco-Oakland-Hayward, CA	06	California	001	Alameda	37.687526	-121.784217
07/13/2014	AQS	060010007	3	2.2	ug/m3 LC	9	Livermore	1	100.0000	88101	PM2.5 - Local Conditions	41860	San Francisco-Oakland-Hayward, CA	06	California	001	Alameda	37.687526	-121.784217
07/14/2014	AQS	060010007	3	7.2	ug/m3 LC	30	Livermore	1	100.0000	88101	PM2.5 - Local Conditions	41860	San Francisco-Oakland-Hayward, CA	06	California	001	Alameda	37.687526	-121.784217
07/15/2014	AQS	060010007	3	6.3	ug/m3 LC	26	Livermore	1	100.0000	88101	PM2.5 - Local Conditions	41860	San Francisco-Oakland-Hayward, CA	06	California	001	Alameda	37.687526	-121.784217
07/16/2014	AQS	060010007	3	2	ug/m3 LC	8	Livermore	1	100.0000	88101	PM2.5 - Local Conditions	41860	San Francisco-Oakland-Hayward, CA	06	California	001	Alameda	37.687526	-121.784217
07/17/2014	AQS	060010007	3	0.8	ug/m3 LC	3	Livermore	1	100.0000	88101	PM2.5 - Local Conditions	41860	San Francisco-Oakland-Hayward, CA	06	California	001	Alameda	37.687526	-121.784217
07/18/2014	AQS	060010007	3	1	ug/m3 LC	4	Livermore	1	100.0000	88101	PM2.5 - Local Conditions	41860	San Francisco-Oakland-Hayward, CA	06	California	001	Alameda	37.687526	-121.784217
07/19/2014	AQS	060010007	3	1.8	ug/m3 LC	8	Livermore	1	100.0000	88101	PM2.5 - Local Conditions	41860	San Francisco-Oakland-Hayward, CA	06	California	001	Alameda	37.687526	-121.784217
07/20/2014	AQS	060010007	3	1.6	ug/m3 LC	7	Livermore	1	100.0000	88101	PM2.5 - Local Conditions	41860	San Francisco-Oakland-Hayward, CA	06	California	001	Alameda	37.687526	-121.784217
07/21/2014	AQS	060010007	3	0.8	ug/m3 LC	3	Livermore	1	100.0000	88101	PM2.5 - Local Conditions	41860	San Francisco-Oakland-Hayward, CA	06	California	001	Alameda	37.687526	-121.784217
07/22/2014	AQS	060010007	3	0	ug/m3 LC	0	Livermore	1	100.0000	88101	PM2.5 - Local Conditions	41860	San Francisco-Oakland-Hayward, CA	06	California	001	Alameda	37.687526	-121.784217
07/23/2014	AQS	060010007	3	-0.9	ug/m3 LC	0	Livermore	1	100.0000	88101	PM2.5 - Local Conditions	41860	San Francisco-Oakland-Hayward, CA	06	California	001	Alameda	37.687526	-121.784217
07/24/2014	AQS	060010007	3	2.6	ug/m3 LC	11	Livermore	1	100.0000	88101	PM2.5 - Local Conditions	41860	San Francisco-Oakland-Hayward, CA	06	California	001	Alameda	37.687526	-121.784217
07/25/2014	AQS	060010007	3	4.9	ug/m3 LC	20	Livermore	1	100.0000	88101	PM2.5 - Local Conditions	41860	San Francisco-Oakland-Hayward, CA	06	California	001	Alameda	37.687526	-121.784217
07/26/2014	AQS	060010007	3	7	ug/m3 LC	29	Livermore	1	100.0000	88101	PM2.5 - Local Conditions	41860	San Francisco-Oakland-Hayward, CA	06	California	001	Alameda	37.687526	-121.784217
07/27/2014	AQS	060010007	3	7.1	ug/m3 LC	30	Livermore	1	100.0000	88101	PM2.5 - Local Conditions	41860	San Francisco-Oakland-Hayward, CA	06	California	001	Alameda	37.687526	-121.784217
07/28/2014	AQS	060010007	3	5.4	ug/m3 LC	23	Livermore	1	100.0000	88101	PM2.5 - Local Conditions	41860	San Francisco-Oakland-Hayward, CA	06	California	001	Alameda	37.687526	-121.784217
07/29/2014	AQS	060010007	3	3.6	ug/m3 LC	15	Livermore	1	100.0000	88101	PM2.5 - Local Conditions	41860	San Francisco-Oakland-Hayward, CA	06	California	001	Alameda	37.687526	-121.784217
07/30/2014	AQS	060010007	3	5.7	ug/m3 LC	24	Livermore	1	100.0000	88101	PM2.5 - Local Conditions	41860	San Francisco-Oakland-Hayward, CA	06	California	001	Alameda	37.687526	-121.784217
07/31/2014	AQS	060010007	3	4.7	ug/m3 LC	20	Livermore	1	100.0000	88101	PM2.5 - Local Conditions	41860	San Francisco-Oakland-Hayward, CA	06	California	001	Alameda	37.687526	-121.784217
08/01/2014	AQS	060010007	3	5.7	ug/m3 LC	24	Livermore	1	100.0000	88101	PM2.5 - Local Conditions	41860	San Francisco-Oakland-Hayward, CA	06	California	001	Alameda	37.687526	-121.784217
08/02/2014	AQS	060010007	3	7.7	ug/m3 LC	32	Livermore	1	100.0000	88101	PM2.5 - Local Conditions	41860	San Francisco-Oakland-Hayward, CA	06	California	001	Alameda	37.687526	-121.784217
08/03/2014	AQS	060010007	3	6	ug/m3 LC	25	Livermore	1	100.0000	88101	PM2.5 - Local Conditions	41860	San Francisco-Oakland-Hayward, CA	06	California	001	Alameda	37.687526	-121.784217
08/04/2014	AQS	060010007	3	4.3	ug/m3 LC	18	Livermore	1	100.0000	88101	PM2.5 - Local Conditions	41860	San Francisco-Oakland-Hayward, CA	06	California	001	Alameda	37.687526	-121.784217
08/05/2014	AQS	060010007	3	7	ug/m3 LC	29	Livermore	1	100.0000	88101	PM2.5 - Local Conditions	41860	San Francisco-Oakland-Hayward, CA	06	California	001	Alameda	37.687526	-121.784217
08/06/2014	AQS	060010007	3	9.1	ug/m3 LC	38	Livermore	1	100.0000	88101	PM2.5 - Local Conditions	41860	San Francisco-Oakland-Hayward, CA	06	California	001	Alameda	37.687526	-121.784217
08/07/2014	AQS	060010007	3	9	ug/m3 LC	38	Livermore	1	100.0000	88101	PM2.5 - Local Conditions	41860	San Francisco-Oakland-Hayward, CA	06	California	001	Alameda	37.687526	-121.784217
08/12/2014	AQS	060010007	3	6.1	ug/m3 LC	25	Livermore	1	100.0000	88101	PM2.5 - Local Conditions	41860	San Francisco-Oakland-Hayward, CA	06	California	001	Alameda	37.687526	-121.784217
08/13/2014	AQS	060010007	3	3.5	ug/m3 LC	15	Livermore	1	100.0000	88101	PM2.5 - Local Conditions	41860	San Francisco-Oakland-Hayward, CA	06	California	001	Alameda	37.687526	-121.784217
08/14/2014	AQS	060010007	3	3.7	ug/m3 LC	15	Livermore	1	100.0000	88101	PM2.5 - Local Conditions	41860	San Francisco-Oakland-Hayward, CA	06	California	001	Alameda	37.687526	-121.784217
08/15/2014	AQS	060010007	3	6	ug/m3 LC	25	Livermore	1	100.0000	88101	PM2.5 - Local Conditions	41860	San Francisco-Oakland-Hayward, CA	06	California	001	Alameda	37.687526	-121.784217
08/16/2014	AQS	060010007	3	7.3	ug/m3 LC	30	Livermore	1	100.0000	88101	PM2.5 - Local Conditions	41860	San Francisco-Oakland-Hayward, CA	06	California	001	Alameda	37.687526	-121.784217
08/17/2014	AQS	060010007	3	6.5	ug/m3 LC	27	Livermore	1	100.0000	88101	PM2.5 - Local Conditions	41860	San Francisco-Oakland-Hayward, CA	06	California	001	Alameda	37.687526	-121.784217
08/18/2014	AQS	060010007	3	5.5	ug/m3 LC	23	Livermore	1	100.0000	88101	PM2.5 - Local Conditions	41860	San Francisco-Oakland-Hayward, CA	06	California	001	Alameda	37.687526	-121.784217
08/19/2014	AQS	060010007	3	5.2	ug/m3 LC	22	Livermore	1	100.0000	88101	PM2.5 - Local Conditions	41860	San Francisco-Oakland-Hayward, CA	06	California	001	Alameda	37.687526	-121.784217
08/20/2014	AQS	060010007	3	4.3	ug/m3 LC	18	Livermore	1	100.0000	88101	PM2.5 - Local Conditions	41860	San Francisco-Oakland-Hayward, CA	06	California	001	Alameda	37.687526	-121.784217
08/21/2014	AQS	060010007	3	5.8	ug/m3 LC	24	Livermore	1	100.0000	88101	PM2.5 - Local Conditions	41860	San Francisco-Oakland-Hayward, CA	06	California	001	Alameda	37.687526	-121.784217
08/22/2014	AQS	060010007	3	5.1	ug/m3 LC	21	Livermore	1	100.0000	88101	PM2.5 - Local Conditions	41860	San Francisco-Oakland-Hayward, CA	06	California	001	Alameda	37.687526	-121.784217
08/23/2014	AQS	060010007	3	4.6	ug/m3 LC	19	Livermore	1	100.0000	88101	PM2.5 - Local Conditions	41860	San Francisco-Oakland-Hayward, CA	06	California	001	Alameda	37.687526	-121.784217
08/24/2014	AQS	060010007	3	5.6	ug/m3 LC	23	Livermore	1	100.0000	88101	PM2.5 - Local Conditions	41860	San Francisco-Oakland-Hayward, CA	06	California	001	Alameda	37.687526	-121.784217
08/25/2014	AQS	060010007	3	6.6	ug/m3 LC	28	Livermore	1	100.0000	88101	PM2.5 - Local Conditions	41860	San Francisco-Oakland-Hayward, CA	06	California	001	Alameda	37.687526	-121.784217
08/26/2014	AQS	060010007	3	6.8	ug/m3 LC	28	Livermore	1	100.0000	88101	PM2.5 - Local Conditions	41860	San Francisco-Oakland-Hayward, CA	06	California	001	Alameda	37.687526	-121.784217
08/27/2014	AQS	060010007	3	7.2	ug/m3 LC	30	Livermore	1	100.0000	88101	PM2.5 - Local Conditions	41860	San Francisco-Oakland-Hayward, CA	06	California	001	Alameda	37.687526	-121.784217
08/28/2014	AQS	060010007	3	9.7	ug/m3 LC	40	Livermore	1	100.0000	88101	PM2.5 - Local Conditions	41860	San Francisco-Oakland-Hayward, CA	06	California	001	Alameda	37.687526	-121.784217
08/29/2014	AQS	060010007	3	6.6	ug/m3 LC	28	Livermore	1	100.0000	88101	PM2.5 - Local Conditions	41860	San Francisco-Oakland-Hayward, CA	06	California	001	Alameda	37.687526	-121.784217
08/30/2014	AQS	060010007	3	4.2	ug/m3 LC	18	Livermore	1	100.0000	88101	PM2.5 - Local Conditions	41860	San Francisco-Oakland-Hayward, CA	06	California	001	Alameda	37.687526	-121.784217
08/31/2014	AQS	060010007	3	4.3	ug/m3 LC	18	Livermore	1	100.0000	88101	PM2.5 - Local Conditions	41860	San Francisco-Oakland-Hayward, CA	06	California	001	Alameda	37.687526	-121.784217
09/01/2014	AQS	060010007	3	14	ug/m3 LC	55	Livermore	1	100.0000	88101	PM2.5 - Local Conditions	41860	San Francisco-Oakland-Hayward, CA	06	California	001	Alameda	37.687526	-121.784217
09/02/2014	AQS	060010007	3	11.7	ug/m3 LC	49	Livermore	1	100.0000	88101	PM2.5 - Local Conditions	41860	San Francisco-Oakland-Hayward, CA	06	California	001	Alameda	37.687526	-121.784217
09/03/2014	AQS	060010007	3	8.8	ug/m3 LC	37	Livermore	1	100.0000	88101	PM2.5 - Local Conditions	41860	San Francisco-Oakland-Hayward, CA	06	California	001	Alameda	37.687526	-121.784217
09/04/2014	AQS	060010007	3	12.8	ug/m3 LC	52	Livermore	1	100.0000	88101	PM2.5 - Local Conditions	41860	San Francisco-Oakland-Hayward, CA	06	California	001	Alameda	37.687526	-121.784217
09/05/2014	AQS	060010007	3	16.1	ug/m3 LC	59	Livermore	1	100.0000	88101	PM2.5 - Local Conditions	41860	San Francisco-Oakland-Hayward, CA	06	California	001	Alameda	37.687526	-121.784217
09/06/2014	AQS	060010007	3	23.4	ug/m3 LC	75	Livermore	1	100.0000	88101	PM2.5 - Local Conditions	41860	San Francisco-Oakland-Hayward, CA	06	California	001	Alameda	37.687526	-121.784217
09/07/2014	AQS	060010007	3	13.9	ug/m3 LC	55	Livermore	1	100.0000	88101	PM2.5 - Local Conditions	41860	San Francisco-Oakland-Hayward, CA	06	California	001	Alameda	37.687526	-121.784217
09/08/2014	AQS	060010007	3	12.3	ug/m3 LC	51	Livermore	1	100.0000	88101	PM2.5 - Local Conditions	41860	San Francisco-Oakland-Hayward, CA	06	California	001	Alameda	37.687526	-121.784217
09/09/2014	AQS	060010007	3	9.8	ug/m3 LC	41	Livermore	1	100.0000	88101	PM2.5 - Local Conditions	41860	San Francisco-Oakland-Hayward, CA	06	California	001	Alameda	37.687526	-121.784217
09/10/2014	AQS	060010007	3	11.4	ug/m3 LC	48	Livermore	1	100.0000	88101	PM2.5 - Local Conditions	41860	San Francisco-Oakland-Hayward, CA	06	California	001	Alameda	37.687526	-121.784217
09/11/2014	AQS	060010007	3	13.4	ug/m3 LC	54	Livermore	1	100.0000	88101	PM2.5 - Local Conditions	41860	San Francisco-Oakland-Hayward, CA	06	California	001	Alameda	37.687526	-121.784217
09/12/2014	AQS	060010007	3	11.7	ug/m3 LC	49	Livermore	1	100.0000	88101	PM2.5 - Local Conditions	41860	San Francisco-Oakland-Hayward, CA	06	California	001	Alameda	37.687526	-121.784217
09/13/2014	AQS	060010007	3	10.5	ug/m3 LC	44	Livermore	1	100.0000	88101	PM2.5 - Local Conditions	41860	San Francisco-Oakland-Hayward, CA	06	California	001	Alameda	37.687526	-121.784217
09/14/2014	AQS	060010007	3	8	ug/m3 LC	33	Livermore	1	100.0000	88101	PM2.5 - Local Conditions	41860	San Francisco-Oakland-Hayward, CA	06	California	001	Alameda	37.687526	-121.784217
09/15/2014	AQS	060010007	3	9.1	ug/m3 LC	38	Livermore	1	100.0000	88101	PM2.5 - Local Conditions	41860	San Francisco-Oakland-Hayward, CA	06	California	001	Alameda	37.687526	-121.784217
09/16/2014	AQS	060010007	3	7.6	ug/m3 LC	32	Livermore	1	100.0000	88101	PM2.5 - Local Conditions	41860	San Francisco-Oakland-Hayward, CA	06	California	001	Alameda	37.687526	-121.784217
09/17/2014	AQS	060010007	3	6.4	ug/m3 LC	27	Livermore	1	100.0000	88101	PM2.5 - Local Conditions	41860	San Francisco-Oakland-Hayward, CA	06	California	001	Alameda	37.687526	-121.784217
09/18/2014	AQS	060010007	3	3.1	ug/m3 LC	13	Livermore	1	100.0000	88101	PM2.5 - Local Conditions	41860	San Francisco-Oakland-Hayward, CA	06	California	001	Alameda	37.687526	-121.784217
09/19/2014	AQS	060010007	3	7	ug/m3 LC	29	Livermore	1	100.0000	88101	PM2.5 - Local Conditions	41860	San Francisco-Oakland-Hayward, CA	06	California	001	Alameda	37.687526	-121.784217
09/20/2014	AQS	060010007	3	7.3	ug/m3 LC	30	Livermore	1	100.0000	88101	PM2.5 - Local Conditions	41860	San Francisco-Oakland-Hayward, CA	06	California	001	Alameda	37.687526	-121.784217
09/21/2014	AQS	060010007	3	5.4	ug/m3 LC	23	Livermore	1	100.0000	88101	PM2.5 - Local Conditions	41860	San Francisco-Oakland-Hayward, CA	06	California	001	Alameda	37.687526	-121.784217
09/22/2014	AQS	060010007	3	6.5	ug/m3 LC	27	Livermore	1	100.0000	88101	PM2.5 - Local Conditions	41860	San Francisco-Oakland-Hayward, CA	06	California	001	Alameda	37.687526	-121.784217
09/23/2014	AQS	060010007	3	3.5	ug/m3 LC	15	Livermore	1	100.0000	88101	PM2.5 - Local Conditions	41860	San Francisco-Oakland-Hayward, CA	06	California	001	Alameda	37.687526	-121.784217
09/24/2014	AQS	060010007	3	2.4	ug/m3 LC	10	Livermore	1	100.0000	88101	PM2.5 - Local Conditions	41860	San Francisco-Oakland-Hayward, CA	06	California	001	Alameda	37.687526	-121.784217
09/25/2014	AQS	060010007	3	3.2	ug/m3 LC	13	Livermore	1	100.0000	88101	PM2.5 - Local Conditions	41860	San Francisco-Oakland-Hayward, CA	06	California	001	Alameda	37.687526	-121.784217
09/26/2014	AQS	060010007	3	5.3	ug/m3 LC	22	Livermore	1	100.0000	88101	PM2.5 - Local Conditions	41860	San Francisco-Oakland-Hayward, CA	06	California	001	Alameda	37.687526	-121.784217
09/27/2014	AQS	060010007	3	6.6	ug/m3 LC	28	Livermore	1	100.0000	88101	PM2.5 - Local Conditions	41860	San Francisco-Oakland-Hayward, CA	06	California	001	Alameda	37.687526	-121.784217
09/28/2014	AQS	060010007	3	8.4	ug/m3 LC	35	Livermore	1	100.0000	88101	PM2.5 - Local Conditions	41860	San Francisco-Oakland-Hayward, CA	06	California	001	Alameda	37.687526	-121.784217
09/29/2014	AQS	060010007	3	8.6	ug/m3 LC	36	Livermore	1	100.0000	88101	PM2.5 - Local Conditions	41860	San Francisco-Oakland-Hayward, CA	06	California	001	Alameda	37.687526	-121.784217
09/30/2014	AQS	060010007	3	4.8	ug/m3 LC	20	Livermore	1	100.0000	88101	PM2.5 - Local Conditions	41860	San Francisco-Oakland-Hayward, CA	06	California	001	Alameda	37.687526	-121.784217
10/01/2014	AQS	060010007	3	4.1	ug/m3 LC	17	Livermore	1	100.0000	88101	PM2.5 - Local Conditions	41860	San Francisco-Oakland-Hayward, CA	06	California	001	Alameda	37.687526	-121.784217
10/02/2014	AQS	060010007	3	5.6	ug/m3 LC	23	Livermore	1	100.0000	88101	PM2.5 - Local Conditions	41860	San Francisco-Oakland-Hayward, CA	06	California	001	Alameda	37.687526	-121.784217
10/03/2014	AQS	060010007	3	8	ug/m3 LC	33	Livermore	1	100.0000	88101	PM2.5 - Local Conditions	41860	San Francisco-Oakland-Hayward, CA	06	California	001	Alameda	37.687526	-121.784217
10/04/2014	AQS	060010007	3	9	ug/m3 LC	38	Livermore	1	100.0000	88101	PM2.5 - Local Conditions	41860	San Francisco-Oakland-Hayward, CA	06	California	001	Alameda	37.687526	-121.784217
10/05/2014	AQS	060010007	3	8.8	ug/m3 LC	37	Livermore	1	100.0000	88101	PM2.5 - Local Conditions	41860	San Francisco-Oakland-Hayward, CA	06	California	001	Alameda	37.687526	-121.784217
10/06/2014	AQS	060010007	3	8.5	ug/m3 LC	35	Livermore	1	100.0000	88101	PM2.5 - Local Conditions	41860	San Francisco-Oakland-Hayward, CA	06	California	001	Alameda	37.687526	-121.784217
10/07/2014	AQS	060010007	3	7.8	ug/m3 LC	33	Livermore	1	100.0000	88101	PM2.5 - Local Conditions	41860	San Francisco-Oakland-Hayward, CA	06	California	001	Alameda	37.687526	-121.784217
10/08/2014	AQS	060010007	3	7.3	ug/m3 LC	30	Livermore	1	100.0000	88101	PM2.5 - Local Conditions	41860	San Francisco-Oakland-Hayward, CA	06	California	001	Alameda	37.687526	-121.784217
10/09/2014	AQS	060010007	3	6.9	ug/m3 LC	29	Livermore	1	100.0000	88101	PM2.5 - Local Conditions	41860	San Francisco-Oakland-Hayward, CA	06	California	001	Alameda	37.687526	-121.784217
10/10/2014	AQS	060010007	3	8.6	ug/m3 LC	36	Livermore	1	100.0000	88101	PM2.5 - Local Conditions	41860	San Francisco-Oakland-Hayward, CA	06	California	001	Alameda	37.687526	-121.784217
10/11/2014	AQS	060010007	3	6.7	ug/m3 LC	28	Livermore	1	100.0000	88101	PM2.5 - Local Conditions	41860	San Francisco-Oakland-Hayward, CA	06	California	001	Alameda	37.687526	-121.784217
10/12/2014	AQS	060010007	3	4.2	ug/m3 LC	18	Livermore	1	100.0000	88101	PM2.5 - Local Conditions	41860	San Francisco-Oakland-Hayward, CA	06	California	001	Alameda	37.687526	-121.784217
10/13/2014	AQS	060010007	3	6	ug/m3 LC	25	Livermore	1	100.0000	88101	PM2.5 - Local Conditions	41860	San Francisco-Oakland-Hayward, CA	06	California	001	Alameda	37.687526	-121.784217
10/14/2014	AQS	060010007	3	8.7	ug/m3 LC	36	Livermore	1	100.0000	88101	PM2.5 - Local Conditions	41860	San Francisco-Oakland-Hayward, CA	06	California	001	Alameda	37.687526	-121.784217
10/15/2014	AQS	060010007	3	6.2	ug/m3 LC	26	Livermore	1	100.0000	88101	PM2.5 - Local Conditions	41860	San Francisco-Oakland-Hayward, CA	06	California	001	Alameda	37.687526	-121.784217
10/16/2014	AQS	060010007	3	5.5	ug/m3 LC	23	Livermore	1	100.0000	88101	PM2.5 - Local Conditions	41860	San Francisco-Oakland-Hayward, CA	06	California	001	Alameda	37.687526	-121.784217
10/17/2014	AQS	060010007	3	5.5	ug/m3 LC	23	Livermore	1	100.0000	88101	PM2.5 - Local Conditions	41860	San Francisco-Oakland-Hayward, CA	06	California	001	Alameda	37.687526	-121.784217
10/18/2014	AQS	060010007	3	6.5	ug/m3 LC	27	Livermore	1	100.0000	88101	PM2.5 - Local Conditions	41860	San Francisco-Oakland-Hayward, CA	06	California	001	Alameda	37.687526	-121.784217
10/19/2014	AQS	060010007	3	5.5	ug/m3 LC	23	Livermore	1	100.0000	88101	PM2.5 - Local Conditions	41860	San Francisco-Oakland-Hayward, CA	06	California	001	Alameda	37.687526	-121.784217
10/20/2014	AQS	060010007	3	4.3	ug/m3 LC	18	Livermore	1	100.0000	88101	PM2.5 - Local Conditions	41860	San Francisco-Oakland-Hayward, CA	06	California	001	Alameda	37.687526	-121.784217
10/21/2014	AQS	060010007	3	4.1	ug/m3 LC	17	Livermore	1	100.0000	88101	PM2.5 - Local Conditions	41860	San Francisco-Oakland-Hayward, CA	06	California	001	Alameda	37.687526	-121.784217
10/22/2014	AQS	060010007	3	5.7	ug/m3 LC	24	Livermore	1	100.0000	88101	PM2.5 - Local Conditions	41860	San Francisco-Oakland-Hayward, CA	06	California	001	Alameda	37.687526	-121.784217
10/23/2014	AQS	060010007	3	5.9	ug/m3 LC	25	Livermore	1	100.0000	88101	PM2.5 - Local Conditions	41860	San Francisco-Oakland-Hayward, CA	06	California	001	Alameda	37.687526	-121.784217
10/24/2014	AQS	060010007	3	6.9	ug/m3 LC	29	Livermore	1	100.0000	88101	PM2.5 - Local Conditions	41860	San Francisco-Oakland-Hayward, CA	06	California	001	Alameda	37.687526	-121.784217
10/25/2014	AQS	060010007	3	4.9	ug/m3 LC	20	Livermore	1	100.0000	88101	PM2.5 - Local Conditions	41860	San Francisco-Oakland-Hayward, CA	06	California	001	Alameda	37.687526	-121.784217
10/26/2014	AQS	060010007	3	3.7	ug/m3 LC	15	Livermore	1	100.0000	88101	PM2.5 - Local Conditions	41860	San Francisco-Oakland-Hayward, CA	06	California	001	Alameda	37.687526	-121.784217
10/27/2014	AQS	060010007	3	4.7	ug/m3 LC	20	Livermore	1	100.0000	88101	PM2.5 - Local Conditions	41860	San Francisco-Oakland-Hayward, CA	06	California	001	Alameda	37.687526	-121.784217
10/28/2014	AQS	060010007	3	6.4	ug/m3 LC	27	Livermore	1	100.0000	88101	PM2.5 - Local Conditions	41860	San Francisco-Oakland-Hayward, CA	06	California	001	Alameda	37.687526	-121.784217
10/29/2014	AQS	060010007	3	9.5	ug/m3 LC	40	Livermore	1	100.0000	88101	PM2.5 - Local Conditions	41860	San Francisco-Oakland-Hayward, CA	06	California	001	Alameda	37.687526	-121.784217
10/30/2014	AQS	060010007	3	9	ug/m3 LC	38	Livermore	1	100.0000	88101	PM2.5 - Local Conditions	41860	San Francisco-Oakland-Hayward, CA	06	California	001	Alameda	37.687526	-121.784217
10/31/2014	AQS	060010007	3	5	ug/m3 LC	21	Livermore	1	100.0000	88101	PM2.5 - Local Conditions	41860	San Francisco-Oakland-Hayward, CA	06	California	001	Alameda	37.687526	-121.784217
11/01/2014	AQS	060010007	3	4.3	ug/m3 LC	18	Livermore	1	100.0000	88101	PM2.5 - Local Conditions	41860	San Francisco-Oakland-Hayward, CA	06	California	001	Alameda	37.687526	-121.784217
11/02/2014	AQS	060010007	3	5.8	ug/m3 LC	24	Livermore	1	100.0000	88101	PM2.5 - Local Conditions	41860	San Francisco-Oakland-Hayward, CA	06	California	001	Alameda	37.687526	-121.784217
11/03/2014	AQS	060010007	3	5.7	ug/m3 LC	24	Livermore	1	100.0000	88101	PM2.5 - Local Conditions	41860	San Francisco-Oakland-Hayward, CA	06	California	001	Alameda	37.687526	-121.784217
11/04/2014	AQS	060010007	3	8.7	ug/m3 LC	36	Livermore	1	100.0000	88101	PM2.5 - Local Conditions	41860	San Francisco-Oakland-Hayward, CA	06	California	001	Alameda	37.687526	-121.784217
11/05/2014	AQS	060010007	3	14	ug/m3 LC	55	Livermore	1	100.0000	88101	PM2.5 - Local Conditions	41860	San Francisco-Oakland-Hayward, CA	06	California	001	Alameda	37.687526	-121.784217
11/06/2014	AQS	060010007	3	14.7	ug/m3 LC	56	Livermore	1	100.0000	88101	PM2.5 - Local Conditions	41860	San Francisco-Oakland-Hayward, CA	06	California	001	Alameda	37.687526	-121.784217
11/07/2014	AQS	060010007	3	13.6	ug/m3 LC	54	Livermore	1	100.0000	88101	PM2.5 - Local Conditions	41860	San Francisco-Oakland-Hayward, CA	06	California	001	Alameda	37.687526	-121.784217
11/08/2014	AQS	060010007	3	14.7	ug/m3 LC	56	Livermore	1	100.0000	88101	PM2.5 - Local Conditions	41860	San Francisco-Oakland-Hayward, CA	06	California	001	Alameda	37.687526	-121.784217
11/09/2014	AQS	060010007	3	12.5	ug/m3 LC	52	Livermore	1	100.0000	88101	PM2.5 - Local Conditions	41860	San Francisco-Oakland-Hayward, CA	06	California	001	Alameda	37.687526	-121.784217
11/10/2014	AQS	060010007	3	12	ug/m3 LC	50	Livermore	1	100.0000	88101	PM2.5 - Local Conditions	41860	San Francisco-Oakland-Hayward, CA	06	California	001	Alameda	37.687526	-121.784217
11/11/2014	AQS	060010007	3	6	ug/m3 LC	25	Livermore	1	100.0000	88101	PM2.5 - Local Conditions	41860	San Francisco-Oakland-Hayward, CA	06	California	001	Alameda	37.687526	-121.784217
11/12/2014	AQS	060010007	3	7.1	ug/m3 LC	30	Livermore	1	100.0000	88101	PM2.5 - Local Conditions	41860	San Francisco-Oakland-Hayward, CA	06	California	001	Alameda	37.687526	-121.784217
11/13/2014	AQS	060010007	3	4.5	ug/m3 LC	19	Livermore	1	100.0000	88101	PM2.5 - Local Conditions	41860	San Francisco-Oakland-Hayward, CA	06	California	001	Alameda	37.687526	-121.784217
11/14/2014	AQS	060010007	3	6.3	ug/m3 LC	26	Livermore	1	100.0000	88101	PM2.5 - Local Conditions	41860	San Francisco-Oakland-Hayward, CA	06	California	001	Alameda	37.687526	-121.784217
11/15/2014	AQS	060010007	3	9.4	ug/m3 LC	39	Livermore	1	100.0000	88101	PM2.5 - Local Conditions	41860	San Francisco-Oakland-Hayward, CA	06	California	001	Alameda	37.687526	-121.784217
11/16/2014	AQS	060010007	3	9.1	ug/m3 LC	38	Livermore	1	100.0000	88101	PM2.5 - Local Conditions	41860	San Francisco-Oakland-Hayward, CA	06	California	001	Alameda	37.687526	-121.784217
11/17/2014	AQS	060010007	3	8.7	ug/m3 LC	36	Livermore	1	100.0000	88101	PM2.5 - Local Conditions	41860	San Francisco-Oakland-Hayward, CA	06	California	001	Alameda	37.687526	-121.784217
11/18/2014	AQS	060010007	3	17.9	ug/m3 LC	63	Livermore	1	100.0000	88101	PM2.5 - Local Conditions	41860	San Francisco-Oakland-Hayward, CA	06	California	001	Alameda	37.687526	-121.784217
11/19/2014	AQS	060010007	3	10.2	ug/m3 LC	43	Livermore	1	100.0000	88101	PM2.5 - Local Conditions	41860	San Francisco-Oakland-Hayward, CA	06	California	001	Alameda	37.687526	-121.784217
11/20/2014	AQS	060010007	3	10.4	ug/m3 LC	43	Livermore	1	100.0000	88101	PM2.5 - Local Conditions	41860	San Francisco-Oakland-Hayward, CA	06	California	001	Alameda	37.687526	-121.784217
11/21/2014	AQS	060010007	3	11.3	ug/m3 LC	47	Livermore	1	100.0000	88101	PM2.5 - Local Conditions	41860	San Francisco-Oakland-Hayward, CA	06	California	001	Alameda	37.687526	-121.784217
11/22/2014	AQS	060010007	3	6.4	ug/m3 LC	27	Livermore	1	100.0000	88101	PM2.5 - Local Conditions	41860	San Francisco-Oakland-Hayward, CA	06	California	001	Alameda	37.687526	-121.784217
11/23/2014	AQS	060010007	3	11.4	ug/m3 LC	48	Livermore	1	100.0000	88101	PM2.5 - Local Conditions	41860	San Francisco-Oakland-Hayward, CA	06	California	001	Alameda	37.687526	-121.784217
11/24/2014	AQS	060010007	3	11.2	ug/m3 LC	47	Livermore	1	100.0000	88101	PM2.5 - Local Conditions	41860	San Francisco-Oakland-Hayward, CA	06	California	001	Alameda	37.687526	-121.784217
11/25/2014	AQS	060010007	3	15.8	ug/m3 LC	59	Livermore	1	100.0000	88101	PM2.5 - Local Conditions	41860	San Francisco-Oakland-Hayward, CA	06	California	001	Alameda	37.687526	-121.784217
11/26/2014	AQS	060010007	3	23	ug/m3 LC	74	Livermore	1	100.0000	88101	PM2.5 - Local Conditions	41860	San Francisco-Oakland-Hayward, CA	06	California	001	Alameda	37.687526	-121.784217
11/27/2014	AQS	060010007	3	23.5	ug/m3 LC	75	Livermore	1	100.0000	88101	PM2.5 - Local Conditions	41860	San Francisco-Oakland-Hayward, CA	06	California	001	Alameda	37.687526	-121.784217
11/28/2014	AQS	060010007	3	16.2	ug/m3 LC	60	Livermore	1	100.0000	88101	PM2.5 - Local Conditions	41860	San Francisco-Oakland-Hayward, CA	06	California	001	Alameda	37.687526	-121.784217
11/29/2014	AQS	060010007	3	9.3	ug/m3 LC	39	Livermore	1	100.0000	88101	PM2.5 - Local Conditions	41860	San Francisco-Oakland-Hayward, CA	06	California	001	Alameda	37.687526	-121.784217
11/30/2014	AQS	060010007	3	13.3	ug/m3 LC	54	Livermore	1	100.0000	88101	PM2.5 - Local Conditions	41860	San Francisco-Oakland-Hayward, CA	06	California	001	Alameda	37.687526	-121.784217
12/01/2014	AQS	060010007	3	9.6	ug/m3 LC	40	Livermore	1	100.0000	88101	PM2.5 - Local Conditions	41860	San Francisco-Oakland-Hayward, CA	06	California	001	Alameda	37.687526	-121.784217
12/02/2014	AQS	060010007	3	5.5	ug/m3 LC	23	Livermore	1	100.0000	88101	PM2.5 - Local Conditions	41860	San Francisco-Oakland-Hayward, CA	06	California	001	Alameda	37.687526	-121.784217
12/03/2014	AQS	060010007	3	4.2	ug/m3 LC	18	Livermore	1	100.0000	88101	PM2.5 - Local Conditions	41860	San Francisco-Oakland-Hayward, CA	06	California	001	Alameda	37.687526	-121.784217
12/04/2014	AQS	060010007	3	5.7	ug/m3 LC	24	Livermore	1	100.0000	88101	PM2.5 - Local Conditions	41860	San Francisco-Oakland-Hayward, CA	06	California	001	Alameda	37.687526	-121.784217
12/05/2014	AQS	060010007	3	5.3	ug/m3 LC	22	Livermore	1	100.0000	88101	PM2.5 - Local Conditions	41860	San Francisco-Oakland-Hayward, CA	06	California	001	Alameda	37.687526	-121.784217
12/06/2014	AQS	060010007	3	3.9	ug/m3 LC	16	Livermore	1	100.0000	88101	PM2.5 - Local Conditions	41860	San Francisco-Oakland-Hayward, CA	06	California	001	Alameda	37.687526	-121.784217
12/07/2014	AQS	060010007	3	9.3	ug/m3 LC	39	Livermore	1	100.0000	88101	PM2.5 - Local Conditions	41860	San Francisco-Oakland-Hayward, CA	06	California	001	Alameda	37.687526	-121.784217
12/08/2014	AQS	060010007	3	8.4	ug/m3 LC	35	Livermore	1	100.0000	88101	PM2.5 - Local Conditions	41860	San Francisco-Oakland-Hayward, CA	06	California	001	Alameda	37.687526	-121.784217
12/09/2014	AQS	060010007	3	10.2	ug/m3 LC	43	Livermore	1	100.0000	88101	PM2.5 - Local Conditions	41860	San Francisco-Oakland-Hayward, CA	06	California	001	Alameda	37.687526	-121.784217
12/10/2014	AQS	060010007	3	5.7	ug/m3 LC	24	Livermore	1	100.0000	88101	PM2.5 - Local Conditions	41860	San Francisco-Oakland-Hayward, CA	06	California	001	Alameda	37.687526	-121.784217
12/11/2014	AQS	060010007	3	2.6	ug/m3 LC	11	Livermore	1	100.0000	88101	PM2.5 - Local Conditions	41860	San Francisco-Oakland-Hayward, CA	06	California	001	Alameda	37.687526	-121.784217
12/12/2014	AQS	060010007	3	7.6	ug/m3 LC	32	Livermore	1	100.0000	88101	PM2.5 - Local Conditions	41860	San Francisco-Oakland-Hayward, CA	06	California	001	Alameda	37.687526	-121.784217
12/13/2014	AQS	060010007	3	14.4	ug/m3 LC	56	Livermore	1	100.0000	88101	PM2.5 - Local Conditions	41860	San Francisco-Oakland-Hayward, CA	06	California	001	Alameda	37.687526	-121.784217
12/14/2014	AQS	060010007	3	10.2	ug/m3 LC	43	Livermore	1	100.0000	88101	PM2.5 - Local Conditions	41860	San Francisco-Oakland-Hayward, CA	06	California	001	Alameda	37.687526	-121.784217
12/15/2014	AQS	060010007	3	6.5	ug/m3 LC	27	Livermore	1	100.0000	88101	PM2.5 - Local Conditions	41860	San Francisco-Oakland-Hayward, CA	06	California	001	Alameda	37.687526	-121.784217
12/16/2014	AQS	060010007	3	5.2	ug/m3 LC	22	Livermore	1	100.0000	88101	PM2.5 - Local Conditions	41860	San Francisco-Oakland-Hayward, CA	06	California	001	Alameda	37.687526	-121.784217
12/17/2014	AQS	060010007	3	7.1	ug/m3 LC	30	Livermore	1	100.0000	88101	PM2.5 - Local Conditions	41860	San Francisco-Oakland-Hayward, CA	06	California	001	Alameda	37.687526	-121.784217
12/18/2014	AQS	060010007	3	6.9	ug/m3 LC	29	Livermore	1	100.0000	88101	PM2.5 - Local Conditions	41860	San Francisco-Oakland-Hayward, CA	06	California	001	Alameda	37.687526	-121.784217
12/19/2014	AQS	060010007	3	6.5	ug/m3 LC	27	Livermore	1	100.0000	88101	PM2.5 - Local Conditions	41860	San Francisco-Oakland-Hayward, CA	06	California	001	Alameda	37.687526	-121.784217
12/23/2014	AQS	060010007	3	6.7	ug/m3 LC	28	Livermore	1	100.0000	88101	PM2.5 - Local Conditions	41860	San Francisco-Oakland-Hayward, CA	06	California	001	Alameda	37.687526	-121.784217
12/24/2014	AQS	060010007	3	6	ug/m3 LC	25	Livermore	1	100.0000	88101	PM2.5 - Local Conditions	41860	San Francisco-Oakland-Hayward, CA	06	California	001	Alameda	37.687526	-121.784217
12/25/2014	AQS	060010007	3	6.1	ug/m3 LC	25	Livermore	1	100.0000	88101	PM2.5 - Local Conditions	41860	San Francisco-Oakland-Hayward, CA	06	California	001	Alameda	37.687526	-121.784217
12/26/2014	AQS	060010007	3	6.7	ug/m3 LC	28	Livermore	1	100.0000	88101	PM2.5 - Local Conditions	41860	San Francisco-Oakland-Hayward, CA	06	California	001	Alameda	37.687526	-121.784217
12/27/2014	AQS	060010007	3	13.3	ug/m3 LC	54	Livermore	1	100.0000	88101	PM2.5 - Local Conditions	41860	San Francisco-Oakland-Hayward, CA	06	California	001	Alameda	37.687526	-121.784217
12/28/2014	AQS	060010007	3	20.1	ug/m3 LC	68	Livermore	1	100.0000	88101	PM2.5 - Local Conditions	41860	San Francisco-Oakland-Hayward, CA	06	California	001	Alameda	37.687526	-121.784217
12/29/2014	AQS	060010007	3	8.7	ug/m3 LC	36	Livermore	1	100.0000	88101	PM2.5 - Local Conditions	41860	San Francisco-Oakland-Hayward, CA	06	California	001	Alameda	37.687526	-121.784217
12/30/2014	AQS	060010007	3	4.2	ug/m3 LC	18	Livermore	1	100.0000	88101	PM2.5 - Local Conditions	41860	San Francisco-Oakland-Hayward, CA	06	California	001	Alameda	37.687526	-121.784217
12/31/2014	AQS	060010007	3	6.4	ug/m3 LC	27	Livermore	1	100.0000	88101	PM2.5 - Local Conditions	41860	San Francisco-Oakland-Hayward, CA	06	California	001	Alameda	37.687526	-121.784217
01/05/2014	AQS	060010007	5	14	ug/m3 LC	55	Livermore	1	100.0000	88502	Acceptable PM2.5 AQI & Speciation Mass	41860	San Francisco-Oakland-Hayward, CA	06	California	001	Alameda	37.687526	-121.784217
01/11/2014	AQS	060010007	5	15.1	ug/m3 LC	57	Livermore	1	100.0000	88502	Acceptable PM2.5 AQI & Speciation Mass	41860	San Francisco-Oakland-Hayward, CA	06	California	001	Alameda	37.687526	-121.784217
01/17/2014	AQS	060010007	5	30.5	ug/m3 LC	90	Livermore	1	100.0000	88502	Acceptable PM2.5 AQI & Speciation Mass	41860	San Francisco-Oakland-Hayward, CA	06	California	001	Alameda	37.687526	-121.784217
01/23/2014	AQS	060010007	5	36.2	ug/m3 LC	103	Livermore	1	100.0000	88502	Acceptable PM2.5 AQI & Speciation Mass	41860	San Francisco-Oakland-Hayward, CA	06	California	001	Alameda	37.687526	-121.784217
01/29/2014	AQS	060010007	5	2.4	ug/m3 LC	10	Livermore	1	100.0000	88502	Acceptable PM2.5 AQI & Speciation Mass	41860	San Francisco-Oakland-Hayward, CA	06	California	001	Alameda	37.687526	-121.784217
02/04/2014	AQS	060010007	5	5.1	ug/m3 LC	21	Livermore	1	100.0000	88502	Acceptable PM2.5 AQI & Speciation Mass	41860	San Francisco-Oakland-Hayward, CA	06	California	001	Alameda	37.687526	-121.784217
02/10/2014	AQS	060010007	5	3.2	ug/m3 LC	13	Livermore	1	100.0000	88502	Acceptable PM2.5 AQI & Speciation Mass	41860	San Francisco-Oakland-Hayward, CA	06	California	001	Alameda	37.687526	-121.784217
02/16/2014	AQS	060010007	5	4.2	ug/m3 LC	18	Livermore	1	100.0000	88502	Acceptable PM2.5 AQI & Speciation Mass	41860	San Francisco-Oakland-Hayward, CA	06	California	001	Alameda	37.687526	-121.784217
02/22/2014	AQS	060010007	5	5.9	ug/m3 LC	25	Livermore	1	100.0000	88502	Acceptable PM2.5 AQI & Speciation Mass	41860	San Francisco-Oakland-Hayward, CA	06	California	001	Alameda	37.687526	-121.784217
02/28/2014	AQS	060010007	5	0.6	ug/m3 LC	3	Livermore	1	100.0000	88502	Acceptable PM2.5 AQI & Speciation Mass	41860	San Francisco-Oakland-Hayward, CA	06	California	001	Alameda	37.687526	-121.784217
03/06/2014	AQS	060010007	5	5	ug/m3 LC	21	Livermore	1	100.0000	88502	Acceptable PM2.5 AQI & Speciation Mass	41860	San Francisco-Oakland-Hayward, CA	06	California	001	Alameda	37.687526	-121.784217
03/12/2014	AQS	060010007	5	1.6	ug/m3 LC	7	Livermore	1	100.0000	88502	Acceptable PM2.5 AQI & Speciation Mass	41860	San Francisco-Oakland-Hayward, CA	06	California	001	Alameda	37.687526	-121.784217
03/18/2014	AQS	060010007	5	1.5	ug/m3 LC	6	Livermore	1	100.0000	88502	Acceptable PM2.5 AQI & Speciation Mass	41860	San Francisco-Oakland-Hayward, CA	06	California	001	Alameda	37.687526	-121.784217
03/24/2014	AQS	060010007	5	8.8	ug/m3 LC	37	Livermore	1	100.0000	88502	Acceptable PM2.5 AQI & Speciation Mass	41860	San Francisco-Oakland-Hayward, CA	06	California	001	Alameda	37.687526	-121.784217
03/30/2014	AQS	060010007	5	3	ug/m3 LC	13	Livermore	1	100.0000	88502	Acceptable PM2.5 AQI & Speciation Mass	41860	San Francisco-Oakland-Hayward, CA	06	California	001	Alameda	37.687526	-121.784217
04/05/2014	AQS	060010007	5	4.9	ug/m3 LC	20	Livermore	1	100.0000	88502	Acceptable PM2.5 AQI & Speciation Mass	41860	San Francisco-Oakland-Hayward, CA	06	California	001	Alameda	37.687526	-121.784217
04/11/2014	AQS	060010007	5	8.5	ug/m3 LC	35	Livermore	1	100.0000	88502	Acceptable PM2.5 AQI & Speciation Mass	41860	San Francisco-Oakland-Hayward, CA	06	California	001	Alameda	37.687526	-121.784217
04/17/2014	AQS	060010007	5	9.5	ug/m3 LC	40	Livermore	1	100.0000	88502	Acceptable PM2.5 AQI & Speciation Mass	41860	San Francisco-Oakland-Hayward, CA	06	California	001	Alameda	37.687526	-121.784217
04/23/2014	AQS	060010007	5	2.5	ug/m3 LC	10	Livermore	1	100.0000	88502	Acceptable PM2.5 AQI & Speciation Mass	41860	San Francisco-Oakland-Hayward, CA	06	California	001	Alameda	37.687526	-121.784217
04/29/2014	AQS	060010007	5	6.3	ug/m3 LC	26	Livermore	1	100.0000	88502	Acceptable PM2.5 AQI & Speciation Mass	41860	San Francisco-Oakland-Hayward, CA	06	California	001	Alameda	37.687526	-121.784217
05/05/2014	AQS	060010007	5	2.5	ug/m3 LC	10	Livermore	1	100.0000	88502	Acceptable PM2.5 AQI & Speciation Mass	41860	San Francisco-Oakland-Hayward, CA	06	California	001	Alameda	37.687526	-121.784217
05/11/2014	AQS	060010007	5	2.1	ug/m3 LC	9	Livermore	1	100.0000	88502	Acceptable PM2.5 AQI & Speciation Mass	41860	San Francisco-Oakland-Hayward, CA	06	California	001	Alameda	37.687526	-121.784217
05/17/2014	AQS	060010007	5	4.5	ug/m3 LC	19	Livermore	1	100.0000	88502	Acceptable PM2.5 AQI & Speciation Mass	41860	San Francisco-Oakland-Hayward, CA	06	California	001	Alameda	37.687526	-121.784217
05/23/2014	AQS	060010007	5	4.4	ug/m3 LC	18	Livermore	1	100.0000	88502	Acceptable PM2.5 AQI & Speciation Mass	41860	San Francisco-Oakland-Hayward, CA	06	California	001	Alameda	37.687526	-121.784217
05/29/2014	AQS	060010007	5	5.2	ug/m3 LC	22	Livermore	1	100.0000	88502	Acceptable PM2.5 AQI & Speciation Mass	41860	San Francisco-Oakland-Hayward, CA	06	California	001	Alameda	37.687526	-121.784217
06/04/2014	AQS	060010007	5	7.3	ug/m3 LC	30	Livermore	1	100.0000	88502	Acceptable PM2.5 AQI & Speciation Mass	41860	San Francisco-Oakland-Hayward, CA	06	California	001	Alameda	37.687526	-121.784217
06/10/2014	AQS	060010007	5	9.5	ug/m3 LC	40	Livermore	1	100.0000	88502	Acceptable PM2.5 AQI & Speciation Mass	41860	San Francisco-Oakland-Hayward, CA	06	California	001	Alameda	37.687526	-121.784217
06/16/2014	AQS	060010007	5	4.6	ug/m3 LC	19	Livermore	1	100.0000	88502	Acceptable PM2.5 AQI & Speciation Mass	41860	San Francisco-Oakland-Hayward, CA	06	California	001	Alameda	37.687526	-121.784217
06/22/2014	AQS	060010007	5	7.8	ug/m3 LC	33	Livermore	1	100.0000	88502	Acceptable PM2.5 AQI & Speciation Mass	41860	San Francisco-Oakland-Hayward, CA	06	California	001	Alameda	37.687526	-121.784217
06/28/2014	AQS	060010007	5	2.1	ug/m3 LC	9	Livermore	1	100.0000	88502	Acceptable PM2.5 AQI & Speciation Mass	41860	San Francisco-Oakland-Hayward, CA	06	California	001	Alameda	37.687526	-121.784217
07/04/2014	AQS	060010007	5	10.9	ug/m3 LC	45	Livermore	1	100.0000	88502	Acceptable PM2.5 AQI & Speciation Mass	41860	San Francisco-Oakland-Hayward, CA	06	California	001	Alameda	37.687526	-121.784217
07/10/2014	AQS	060010007	5	2.8	ug/m3 LC	12	Livermore	1	100.0000	88502	Acceptable PM2.5 AQI & Speciation Mass	41860	San Francisco-Oakland-Hayward, CA	06	California	001	Alameda	37.687526	-121.784217
07/16/2014	AQS	060010007	5	4.7	ug/m3 LC	20	Livermore	1	100.0000	88502	Acceptable PM2.5 AQI & Speciation Mass	41860	San Francisco-Oakland-Hayward, CA	06	California	001	Alameda	37.687526	-121.784217
07/22/2014	AQS	060010007	5	3.2	ug/m3 LC	13	Livermore	1	100.0000	88502	Acceptable PM2.5 AQI & Speciation Mass	41860	San Francisco-Oakland-Hayward, CA	06	California	001	Alameda	37.687526	-121.784217
07/28/2014	AQS	060010007	5	6.8	ug/m3 LC	28	Livermore	1	100.0000	88502	Acceptable PM2.5 AQI & Speciation Mass	41860	San Francisco-Oakland-Hayward, CA	06	California	001	Alameda	37.687526	-121.784217
08/03/2014	AQS	060010007	5	5.8	ug/m3 LC	24	Livermore	1	100.0000	88502	Acceptable PM2.5 AQI & Speciation Mass	41860	San Francisco-Oakland-Hayward, CA	06	California	001	Alameda	37.687526	-121.784217
08/09/2014	AQS	060010007	5	8.9	ug/m3 LC	37	Livermore	1	100.0000	88502	Acceptable PM2.5 AQI & Speciation Mass	41860	San Francisco-Oakland-Hayward, CA	06	California	001	Alameda	37.687526	-121.784217
08/15/2014	AQS	060010007	5	4.2	ug/m3 LC	18	Livermore	1	100.0000	88502	Acceptable PM2.5 AQI & Speciation Mass	41860	San Francisco-Oakland-Hayward, CA	06	California	001	Alameda	37.687526	-121.784217
08/21/2014	AQS	060010007	5	3.3	ug/m3 LC	14	Livermore	1	100.0000	88502	Acceptable PM2.5 AQI & Speciation Mass	41860	San Francisco-Oakland-Hayward, CA	06	California	001	Alameda	37.687526	-121.784217
08/27/2014	AQS	060010007	5	6.2	ug/m3 LC	26	Livermore	1	100.0000	88502	Acceptable PM2.5 AQI & Speciation Mass	41860	San Francisco-Oakland-Hayward, CA	06	California	001	Alameda	37.687526	-121.784217
09/02/2014	AQS	060010007	5	8.8	ug/m3 LC	37	Livermore	1	100.0000	88502	Acceptable PM2.5 AQI & Speciation Mass	41860	San Francisco-Oakland-Hayward, CA	06	California	001	Alameda	37.687526	-121.784217
09/08/2014	AQS	060010007	5	9.1	ug/m3 LC	38	Livermore	1	100.0000	88502	Acceptable PM2.5 AQI & Speciation Mass	41860	San Francisco-Oakland-Hayward, CA	06	California	001	Alameda	37.687526	-121.784217
09/14/2014	AQS	060010007	5	7	ug/m3 LC	29	Livermore	1	100.0000	88502	Acceptable PM2.5 AQI & Speciation Mass	41860	San Francisco-Oakland-Hayward, CA	06	California	001	Alameda	37.687526	-121.784217
09/20/2014	AQS	060010007	5	6.1	ug/m3 LC	25	Livermore	1	100.0000	88502	Acceptable PM2.5 AQI & Speciation Mass	41860	San Francisco-Oakland-Hayward, CA	06	California	001	Alameda	37.687526	-121.784217
09/26/2014	AQS	060010007	5	4.1	ug/m3 LC	17	Livermore	1	100.0000	88502	Acceptable PM2.5 AQI & Speciation Mass	41860	San Francisco-Oakland-Hayward, CA	06	California	001	Alameda	37.687526	-121.784217
10/02/2014	AQS	060010007	5	5.3	ug/m3 LC	22	Livermore	1	100.0000	88502	Acceptable PM2.5 AQI & Speciation Mass	41860	San Francisco-Oakland-Hayward, CA	06	California	001	Alameda	37.687526	-121.784217
10/08/2014	AQS	060010007	5	5.6	ug/m3 LC	23	Livermore	1	100.0000	88502	Acceptable PM2.5 AQI & Speciation Mass	41860	San Francisco-Oakland-Hayward, CA	06	California	001	Alameda	37.687526	-121.784217
10/14/2014	AQS	060010007	5	6.7	ug/m3 LC	28	Livermore	1	100.0000	88502	Acceptable PM2.5 AQI & Speciation Mass	41860	San Francisco-Oakland-Hayward, CA	06	California	001	Alameda	37.687526	-121.784217
10/20/2014	AQS	060010007	5	1.9	ug/m3 LC	8	Livermore	1	100.0000	88502	Acceptable PM2.5 AQI & Speciation Mass	41860	San Francisco-Oakland-Hayward, CA	06	California	001	Alameda	37.687526	-121.784217
10/26/2014	AQS	060010007	5	3.3	ug/m3 LC	14	Livermore	1	100.0000	88502	Acceptable PM2.5 AQI & Speciation Mass	41860	San Francisco-Oakland-Hayward, CA	06	California	001	Alameda	37.687526	-121.784217
11/01/2014	AQS	060010007	5	3.3	ug/m3 LC	14	Livermore	1	100.0000	88502	Acceptable PM2.5 AQI & Speciation Mass	41860	San Francisco-Oakland-Hayward, CA	06	California	001	Alameda	37.687526	-121.784217
11/07/2014	AQS	060010007	5	10	ug/m3 LC	42	Livermore	1	100.0000	88502	Acceptable PM2.5 AQI & Speciation Mass	41860	San Francisco-Oakland-Hayward, CA	06	California	001	Alameda	37.687526	-121.784217
11/13/2014	AQS	060010007	5	2.4	ug/m3 LC	10	Livermore	1	100.0000	88502	Acceptable PM2.5 AQI & Speciation Mass	41860	San Francisco-Oakland-Hayward, CA	06	California	001	Alameda	37.687526	-121.784217
11/19/2014	AQS	060010007	5	9.4	ug/m3 LC	39	Livermore	1	100.0000	88502	Acceptable PM2.5 AQI & Speciation Mass	41860	San Francisco-Oakland-Hayward, CA	06	California	001	Alameda	37.687526	-121.784217
11/25/2014	AQS	060010007	5	15.9	ug/m3 LC	59	Livermore	1	100.0000	88502	Acceptable PM2.5 AQI & Speciation Mass	41860	San Francisco-Oakland-Hayward, CA	06	California	001	Alameda	37.687526	-121.784217
12/01/2014	AQS	060010007	5	10.3	ug/m3 LC	43	Livermore	1	100.0000	88502	Acceptable PM2.5 AQI & Speciation Mass	41860	San Francisco-Oakland-Hayward, CA	06	California	001	Alameda	37.687526	-121.784217
12/07/2014	AQS	060010007	5	11	ug/m3 LC	46	Livermore	1	100.0000	88502	Acceptable PM2.5 AQI & Speciation Mass	41860	San Francisco-Oakland-Hayward, CA	06	California	001	Alameda	37.687526	-121.784217
12/13/2014	AQS	060010007	5	16.8	ug/m3 LC	61	Livermore	1	100.0000	88502	Acceptable PM2.5 AQI & Speciation Mass	41860	San Francisco-Oakland-Hayward, CA	06	California	001	Alameda	37.687526	-121.784217
12/19/2014	AQS	060010007	5	5.8	ug/m3 LC	24	Livermore	1	100.0000	88502	Acceptable PM2.5 AQI & Speciation Mass	41860	San Francisco-Oakland-Hayward, CA	06	California	001	Alameda	37.687526	-121.784217
12/25/2014	AQS	060010007	5	5.6	ug/m3 LC	23	Livermore	1	100.0000	88502	Acceptable PM2.5 AQI & Speciation Mass	41860	San Francisco-Oakland-Hayward, CA	06	California	001	Alameda	37.687526	-121.784217
12/31/2014	AQS	060010007	5	6.4	ug/m3 LC	27	Livermore	1	100.0000	88502	Acceptable PM2.5 AQI & Speciation Mass	41860	San Francisco-Oakland-Hayward, CA	06	California	001	Alameda	37.687526	-121.784217
01/01/2014	AQS	060010009	3	24.9	ug/m3 LC	78	Oakland	1	100.0000	88101	PM2.5 - Local Conditions	41860	San Francisco-Oakland-Hayward, CA	06	California	001	Alameda	37.743065	-122.169935
01/02/2014	AQS	060010009	3	18	ug/m3 LC	63	Oakland	1	100.0000	88101	PM2.5 - Local Conditions	41860	San Francisco-Oakland-Hayward, CA	06	California	001	Alameda	37.743065	-122.169935
01/03/2014	AQS	060010009	3	18.1	ug/m3 LC	64	Oakland	1	100.0000	88101	PM2.5 - Local Conditions	41860	San Francisco-Oakland-Hayward, CA	06	California	001	Alameda	37.743065	-122.169935
01/04/2014	AQS	060010009	3	15.9	ug/m3 LC	59	Oakland	1	100.0000	88101	PM2.5 - Local Conditions	41860	San Francisco-Oakland-Hayward, CA	06	California	001	Alameda	37.743065	-122.169935
01/05/2014	AQS	060010009	3	8.4	ug/m3 LC	35	Oakland	1	100.0000	88101	PM2.5 - Local Conditions	41860	San Francisco-Oakland-Hayward, CA	06	California	001	Alameda	37.743065	-122.169935
01/06/2014	AQS	060010009	3	26.9	ug/m3 LC	82	Oakland	1	100.0000	88101	PM2.5 - Local Conditions	41860	San Francisco-Oakland-Hayward, CA	06	California	001	Alameda	37.743065	-122.169935
01/07/2014	AQS	060010009	3	29.7	ug/m3 LC	88	Oakland	1	100.0000	88101	PM2.5 - Local Conditions	41860	San Francisco-Oakland-Hayward, CA	06	California	001	Alameda	37.743065	-122.169935
01/08/2014	AQS	060010009	3	6.7	ug/m3 LC	28	Oakland	1	100.0000	88101	PM2.5 - Local Conditions	41860	San Francisco-Oakland-Hayward, CA	06	California	001	Alameda	37.743065	-122.169935
01/09/2014	AQS	060010009	3	7.2	ug/m3 LC	30	Oakland	1	100.0000	88101	PM2.5 - Local Conditions	41860	San Francisco-Oakland-Hayward, CA	06	California	001	Alameda	37.743065	-122.169935
01/10/2014	AQS	060010009	3	10.4	ug/m3 LC	43	Oakland	1	100.0000	88101	PM2.5 - Local Conditions	41860	San Francisco-Oakland-Hayward, CA	06	California	001	Alameda	37.743065	-122.169935
01/11/2014	AQS	060010009	3	10.9	ug/m3 LC	45	Oakland	1	100.0000	88101	PM2.5 - Local Conditions	41860	San Francisco-Oakland-Hayward, CA	06	California	001	Alameda	37.743065	-122.169935
01/12/2014	AQS	060010009	3	7.7	ug/m3 LC	32	Oakland	1	100.0000	88101	PM2.5 - Local Conditions	41860	San Francisco-Oakland-Hayward, CA	06	California	001	Alameda	37.743065	-122.169935
01/13/2014	AQS	060010009	3	4.5	ug/m3 LC	19	Oakland	1	100.0000	88101	PM2.5 - Local Conditions	41860	San Francisco-Oakland-Hayward, CA	06	California	001	Alameda	37.743065	-122.169935
01/14/2014	AQS	060010009	3	9.2	ug/m3 LC	38	Oakland	1	100.0000	88101	PM2.5 - Local Conditions	41860	San Francisco-Oakland-Hayward, CA	06	California	001	Alameda	37.743065	-122.169935
01/15/2014	AQS	060010009	3	10.8	ug/m3 LC	45	Oakland	1	100.0000	88101	PM2.5 - Local Conditions	41860	San Francisco-Oakland-Hayward, CA	06	California	001	Alameda	37.743065	-122.169935
01/16/2014	AQS	060010009	3	10.7	ug/m3 LC	45	Oakland	1	100.0000	88101	PM2.5 - Local Conditions	41860	San Francisco-Oakland-Hayward, CA	06	California	001	Alameda	37.743065	-122.169935
01/17/2014	AQS	060010009	3	20.5	ug/m3 LC	69	Oakland	1	100.0000	88101	PM2.5 - Local Conditions	41860	San Francisco-Oakland-Hayward, CA	06	California	001	Alameda	37.743065	-122.169935
01/18/2014	AQS	060010009	3	18	ug/m3 LC	63	Oakland	1	100.0000	88101	PM2.5 - Local Conditions	41860	San Francisco-Oakland-Hayward, CA	06	California	001	Alameda	37.743065	-122.169935
01/19/2014	AQS	060010009	3	23.6	ug/m3 LC	75	Oakland	1	100.0000	88101	PM2.5 - Local Conditions	41860	San Francisco-Oakland-Hayward, CA	06	California	001	Alameda	37.743065	-122.169935
01/20/2014	AQS	060010009	3	21.6	ug/m3 LC	71	Oakland	1	100.0000	88101	PM2.5 - Local Conditions	41860	San Francisco-Oakland-Hayward, CA	06	California	001	Alameda	37.743065	-122.169935
01/21/2014	AQS	060010009	3	11.8	ug/m3 LC	49	Oakland	1	100.0000	88101	PM2.5 - Local Conditions	41860	San Francisco-Oakland-Hayward, CA	06	California	001	Alameda	37.743065	-122.169935
01/22/2014	AQS	060010009	3	12.3	ug/m3 LC	51	Oakland	1	100.0000	88101	PM2.5 - Local Conditions	41860	San Francisco-Oakland-Hayward, CA	06	California	001	Alameda	37.743065	-122.169935
01/23/2014	AQS	060010009	3	24.6	ug/m3 LC	77	Oakland	1	100.0000	88101	PM2.5 - Local Conditions	41860	San Francisco-Oakland-Hayward, CA	06	California	001	Alameda	37.743065	-122.169935
01/24/2014	AQS	060010009	3	37.6	ug/m3 LC	106	Oakland	1	100.0000	88101	PM2.5 - Local Conditions	41860	San Francisco-Oakland-Hayward, CA	06	California	001	Alameda	37.743065	-122.169935
01/25/2014	AQS	060010009	3	17.6	ug/m3 LC	63	Oakland	1	100.0000	88101	PM2.5 - Local Conditions	41860	San Francisco-Oakland-Hayward, CA	06	California	001	Alameda	37.743065	-122.169935
01/26/2014	AQS	060010009	3	14.2	ug/m3 LC	55	Oakland	1	100.0000	88101	PM2.5 - Local Conditions	41860	San Francisco-Oakland-Hayward, CA	06	California	001	Alameda	37.743065	-122.169935
01/27/2014	AQS	060010009	3	12.1	ug/m3 LC	51	Oakland	1	100.0000	88101	PM2.5 - Local Conditions	41860	San Francisco-Oakland-Hayward, CA	06	California	001	Alameda	37.743065	-122.169935
01/28/2014	AQS	060010009	3	9	ug/m3 LC	38	Oakland	1	100.0000	88101	PM2.5 - Local Conditions	41860	San Francisco-Oakland-Hayward, CA	06	California	001	Alameda	37.743065	-122.169935
01/29/2014	AQS	060010009	3	5.3	ug/m3 LC	22	Oakland	1	100.0000	88101	PM2.5 - Local Conditions	41860	San Francisco-Oakland-Hayward, CA	06	California	001	Alameda	37.743065	-122.169935
01/30/2014	AQS	060010009	3	4.5	ug/m3 LC	19	Oakland	1	100.0000	88101	PM2.5 - Local Conditions	41860	San Francisco-Oakland-Hayward, CA	06	California	001	Alameda	37.743065	-122.169935
01/31/2014	AQS	060010009	3	5.4	ug/m3 LC	23	Oakland	1	100.0000	88101	PM2.5 - Local Conditions	41860	San Francisco-Oakland-Hayward, CA	06	California	001	Alameda	37.743065	-122.169935
02/01/2014	AQS	060010009	3	5.4	ug/m3 LC	23	Oakland	1	100.0000	88101	PM2.5 - Local Conditions	41860	San Francisco-Oakland-Hayward, CA	06	California	001	Alameda	37.743065	-122.169935
02/02/2014	AQS	060010009	3	4.3	ug/m3 LC	18	Oakland	1	100.0000	88101	PM2.5 - Local Conditions	41860	San Francisco-Oakland-Hayward, CA	06	California	001	Alameda	37.743065	-122.169935
02/03/2014	AQS	060010009	3	7.5	ug/m3 LC	31	Oakland	1	100.0000	88101	PM2.5 - Local Conditions	41860	San Francisco-Oakland-Hayward, CA	06	California	001	Alameda	37.743065	-122.169935
02/04/2014	AQS	060010009	3	6	ug/m3 LC	25	Oakland	1	100.0000	88101	PM2.5 - Local Conditions	41860	San Francisco-Oakland-Hayward, CA	06	California	001	Alameda	37.743065	-122.169935
02/05/2014	AQS	060010009	3	4.7	ug/m3 LC	20	Oakland	1	100.0000	88101	PM2.5 - Local Conditions	41860	San Francisco-Oakland-Hayward, CA	06	California	001	Alameda	37.743065	-122.169935
02/06/2014	AQS	060010009	3	5.7	ug/m3 LC	24	Oakland	1	100.0000	88101	PM2.5 - Local Conditions	41860	San Francisco-Oakland-Hayward, CA	06	California	001	Alameda	37.743065	-122.169935
02/07/2014	AQS	060010009	3	6.2	ug/m3 LC	26	Oakland	1	100.0000	88101	PM2.5 - Local Conditions	41860	San Francisco-Oakland-Hayward, CA	06	California	001	Alameda	37.743065	-122.169935
02/08/2014	AQS	060010009	3	2.1	ug/m3 LC	9	Oakland	1	100.0000	88101	PM2.5 - Local Conditions	41860	San Francisco-Oakland-Hayward, CA	06	California	001	Alameda	37.743065	-122.169935
02/09/2014	AQS	060010009	3	2	ug/m3 LC	8	Oakland	1	100.0000	88101	PM2.5 - Local Conditions	41860	San Francisco-Oakland-Hayward, CA	06	California	001	Alameda	37.743065	-122.169935
02/10/2014	AQS	060010009	3	3.3	ug/m3 LC	14	Oakland	1	100.0000	88101	PM2.5 - Local Conditions	41860	San Francisco-Oakland-Hayward, CA	06	California	001	Alameda	37.743065	-122.169935
02/11/2014	AQS	060010009	3	7	ug/m3 LC	29	Oakland	1	100.0000	88101	PM2.5 - Local Conditions	41860	San Francisco-Oakland-Hayward, CA	06	California	001	Alameda	37.743065	-122.169935
02/12/2014	AQS	060010009	3	11.7	ug/m3 LC	49	Oakland	1	100.0000	88101	PM2.5 - Local Conditions	41860	San Francisco-Oakland-Hayward, CA	06	California	001	Alameda	37.743065	-122.169935
02/13/2014	AQS	060010009	3	10.6	ug/m3 LC	44	Oakland	1	100.0000	88101	PM2.5 - Local Conditions	41860	San Francisco-Oakland-Hayward, CA	06	California	001	Alameda	37.743065	-122.169935
02/14/2014	AQS	060010009	3	4	ug/m3 LC	17	Oakland	1	100.0000	88101	PM2.5 - Local Conditions	41860	San Francisco-Oakland-Hayward, CA	06	California	001	Alameda	37.743065	-122.169935
02/15/2014	AQS	060010009	3	4.2	ug/m3 LC	18	Oakland	1	100.0000	88101	PM2.5 - Local Conditions	41860	San Francisco-Oakland-Hayward, CA	06	California	001	Alameda	37.743065	-122.169935
02/16/2014	AQS	060010009	3	6.2	ug/m3 LC	26	Oakland	1	100.0000	88101	PM2.5 - Local Conditions	41860	San Francisco-Oakland-Hayward, CA	06	California	001	Alameda	37.743065	-122.169935
02/17/2014	AQS	060010009	3	6.2	ug/m3 LC	26	Oakland	1	100.0000	88101	PM2.5 - Local Conditions	41860	San Francisco-Oakland-Hayward, CA	06	California	001	Alameda	37.743065	-122.169935
02/18/2014	AQS	060010009	3	7.4	ug/m3 LC	31	Oakland	1	100.0000	88101	PM2.5 - Local Conditions	41860	San Francisco-Oakland-Hayward, CA	06	California	001	Alameda	37.743065	-122.169935
02/19/2014	AQS	060010009	3	5.5	ug/m3 LC	23	Oakland	1	100.0000	88101	PM2.5 - Local Conditions	41860	San Francisco-Oakland-Hayward, CA	06	California	001	Alameda	37.743065	-122.169935
02/20/2014	AQS	060010009	3	5.6	ug/m3 LC	23	Oakland	1	100.0000	88101	PM2.5 - Local Conditions	41860	San Francisco-Oakland-Hayward, CA	06	California	001	Alameda	37.743065	-122.169935
02/21/2014	AQS	060010009	3	7.1	ug/m3 LC	30	Oakland	1	100.0000	88101	PM2.5 - Local Conditions	41860	San Francisco-Oakland-Hayward, CA	06	California	001	Alameda	37.743065	-122.169935
02/22/2014	AQS	060010009	3	8.1	ug/m3 LC	34	Oakland	1	100.0000	88101	PM2.5 - Local Conditions	41860	San Francisco-Oakland-Hayward, CA	06	California	001	Alameda	37.743065	-122.169935
02/23/2014	AQS	060010009	3	9.7	ug/m3 LC	40	Oakland	1	100.0000	88101	PM2.5 - Local Conditions	41860	San Francisco-Oakland-Hayward, CA	06	California	001	Alameda	37.743065	-122.169935
02/24/2014	AQS	060010009	3	11.2	ug/m3 LC	47	Oakland	1	100.0000	88101	PM2.5 - Local Conditions	41860	San Francisco-Oakland-Hayward, CA	06	California	001	Alameda	37.743065	-122.169935
02/25/2014	AQS	060010009	3	11.2	ug/m3 LC	47	Oakland	1	100.0000	88101	PM2.5 - Local Conditions	41860	San Francisco-Oakland-Hayward, CA	06	California	001	Alameda	37.743065	-122.169935
02/26/2014	AQS	060010009	3	5.7	ug/m3 LC	24	Oakland	1	100.0000	88101	PM2.5 - Local Conditions	41860	San Francisco-Oakland-Hayward, CA	06	California	001	Alameda	37.743065	-122.169935
02/27/2014	AQS	060010009	3	3.3	ug/m3 LC	14	Oakland	1	100.0000	88101	PM2.5 - Local Conditions	41860	San Francisco-Oakland-Hayward, CA	06	California	001	Alameda	37.743065	-122.169935
02/28/2014	AQS	060010009	3	2.7	ug/m3 LC	11	Oakland	1	100.0000	88101	PM2.5 - Local Conditions	41860	San Francisco-Oakland-Hayward, CA	06	California	001	Alameda	37.743065	-122.169935
03/01/2014	AQS	060010009	3	3.5	ug/m3 LC	15	Oakland	1	100.0000	88101	PM2.5 - Local Conditions	41860	San Francisco-Oakland-Hayward, CA	06	California	001	Alameda	37.743065	-122.169935
03/02/2014	AQS	060010009	3	1.9	ug/m3 LC	8	Oakland	1	100.0000	88101	PM2.5 - Local Conditions	41860	San Francisco-Oakland-Hayward, CA	06	California	001	Alameda	37.743065	-122.169935
03/03/2014	AQS	060010009	3	5.6	ug/m3 LC	23	Oakland	1	100.0000	88101	PM2.5 - Local Conditions	41860	San Francisco-Oakland-Hayward, CA	06	California	001	Alameda	37.743065	-122.169935
03/04/2014	AQS	060010009	3	5.7	ug/m3 LC	24	Oakland	1	100.0000	88101	PM2.5 - Local Conditions	41860	San Francisco-Oakland-Hayward, CA	06	California	001	Alameda	37.743065	-122.169935
03/05/2014	AQS	060010009	3	8	ug/m3 LC	33	Oakland	1	100.0000	88101	PM2.5 - Local Conditions	41860	San Francisco-Oakland-Hayward, CA	06	California	001	Alameda	37.743065	-122.169935
03/06/2014	AQS	060010009	3	6.1	ug/m3 LC	25	Oakland	1	100.0000	88101	PM2.5 - Local Conditions	41860	San Francisco-Oakland-Hayward, CA	06	California	001	Alameda	37.743065	-122.169935
03/07/2014	AQS	060010009	3	6.3	ug/m3 LC	26	Oakland	1	100.0000	88101	PM2.5 - Local Conditions	41860	San Francisco-Oakland-Hayward, CA	06	California	001	Alameda	37.743065	-122.169935
03/08/2014	AQS	060010009	3	10.4	ug/m3 LC	43	Oakland	1	100.0000	88101	PM2.5 - Local Conditions	41860	San Francisco-Oakland-Hayward, CA	06	California	001	Alameda	37.743065	-122.169935
03/09/2014	AQS	060010009	3	9.3	ug/m3 LC	39	Oakland	1	100.0000	88101	PM2.5 - Local Conditions	41860	San Francisco-Oakland-Hayward, CA	06	California	001	Alameda	37.743065	-122.169935
03/10/2014	AQS	060010009	3	2.6	ug/m3 LC	11	Oakland	1	100.0000	88101	PM2.5 - Local Conditions	41860	San Francisco-Oakland-Hayward, CA	06	California	001	Alameda	37.743065	-122.169935
03/11/2014	AQS	060010009	3	2.9	ug/m3 LC	12	Oakland	1	100.0000	88101	PM2.5 - Local Conditions	41860	San Francisco-Oakland-Hayward, CA	06	California	001	Alameda	37.743065	-122.169935
03/12/2014	AQS	060010009	3	2.2	ug/m3 LC	9	Oakland	1	100.0000	88101	PM2.5 - Local Conditions	41860	San Francisco-Oakland-Hayward, CA	06	California	001	Alameda	37.743065	-122.169935
03/13/2014	AQS	060010009	3	5.7	ug/m3 LC	24	Oakland	1	100.0000	88101	PM2.5 - Local Conditions	41860	San Francisco-Oakland-Hayward, CA	06	California	001	Alameda	37.743065	-122.169935
03/14/2014	AQS	060010009	3	9.7	ug/m3 LC	40	Oakland	1	100.0000	88101	PM2.5 - Local Conditions	41860	San Francisco-Oakland-Hayward, CA	06	California	001	Alameda	37.743065	-122.169935
03/15/2014	AQS	060010009	3	8.3	ug/m3 LC	35	Oakland	1	100.0000	88101	PM2.5 - Local Conditions	41860	San Francisco-Oakland-Hayward, CA	06	California	001	Alameda	37.743065	-122.169935
03/16/2014	AQS	060010009	3	8.3	ug/m3 LC	35	Oakland	1	100.0000	88101	PM2.5 - Local Conditions	41860	San Francisco-Oakland-Hayward, CA	06	California	001	Alameda	37.743065	-122.169935
03/17/2014	AQS	060010009	3	6.2	ug/m3 LC	26	Oakland	1	100.0000	88101	PM2.5 - Local Conditions	41860	San Francisco-Oakland-Hayward, CA	06	California	001	Alameda	37.743065	-122.169935
03/18/2014	AQS	060010009	3	6.4	ug/m3 LC	27	Oakland	1	100.0000	88101	PM2.5 - Local Conditions	41860	San Francisco-Oakland-Hayward, CA	06	California	001	Alameda	37.743065	-122.169935
03/19/2014	AQS	060010009	3	5.5	ug/m3 LC	23	Oakland	1	100.0000	88101	PM2.5 - Local Conditions	41860	San Francisco-Oakland-Hayward, CA	06	California	001	Alameda	37.743065	-122.169935
03/20/2014	AQS	060010009	3	9.7	ug/m3 LC	40	Oakland	1	100.0000	88101	PM2.5 - Local Conditions	41860	San Francisco-Oakland-Hayward, CA	06	California	001	Alameda	37.743065	-122.169935
03/21/2014	AQS	060010009	3	12.5	ug/m3 LC	52	Oakland	1	100.0000	88101	PM2.5 - Local Conditions	41860	San Francisco-Oakland-Hayward, CA	06	California	001	Alameda	37.743065	-122.169935
03/22/2014	AQS	060010009	3	12.1	ug/m3 LC	51	Oakland	1	100.0000	88101	PM2.5 - Local Conditions	41860	San Francisco-Oakland-Hayward, CA	06	California	001	Alameda	37.743065	-122.169935
03/23/2014	AQS	060010009	3	12.2	ug/m3 LC	51	Oakland	1	100.0000	88101	PM2.5 - Local Conditions	41860	San Francisco-Oakland-Hayward, CA	06	California	001	Alameda	37.743065	-122.169935
03/24/2014	AQS	060010009	3	12.1	ug/m3 LC	51	Oakland	1	100.0000	88101	PM2.5 - Local Conditions	41860	San Francisco-Oakland-Hayward, CA	06	California	001	Alameda	37.743065	-122.169935
03/25/2014	AQS	060010009	3	5	ug/m3 LC	21	Oakland	1	100.0000	88101	PM2.5 - Local Conditions	41860	San Francisco-Oakland-Hayward, CA	06	California	001	Alameda	37.743065	-122.169935
03/26/2014	AQS	060010009	3	3.7	ug/m3 LC	15	Oakland	1	100.0000	88101	PM2.5 - Local Conditions	41860	San Francisco-Oakland-Hayward, CA	06	California	001	Alameda	37.743065	-122.169935
03/27/2014	AQS	060010009	3	7.6	ug/m3 LC	32	Oakland	1	100.0000	88101	PM2.5 - Local Conditions	41860	San Francisco-Oakland-Hayward, CA	06	California	001	Alameda	37.743065	-122.169935
03/28/2014	AQS	060010009	3	4.6	ug/m3 LC	19	Oakland	1	100.0000	88101	PM2.5 - Local Conditions	41860	San Francisco-Oakland-Hayward, CA	06	California	001	Alameda	37.743065	-122.169935
03/29/2014	AQS	060010009	3	3.1	ug/m3 LC	13	Oakland	1	100.0000	88101	PM2.5 - Local Conditions	41860	San Francisco-Oakland-Hayward, CA	06	California	001	Alameda	37.743065	-122.169935
03/30/2014	AQS	060010009	3	4	ug/m3 LC	17	Oakland	1	100.0000	88101	PM2.5 - Local Conditions	41860	San Francisco-Oakland-Hayward, CA	06	California	001	Alameda	37.743065	-122.169935
03/31/2014	AQS	060010009	3	5.1	ug/m3 LC	21	Oakland	1	100.0000	88101	PM2.5 - Local Conditions	41860	San Francisco-Oakland-Hayward, CA	06	California	001	Alameda	37.743065	-122.169935
04/01/2014	AQS	060010009	3	3.1	ug/m3 LC	13	Oakland	1	100.0000	88101	PM2.5 - Local Conditions	41860	San Francisco-Oakland-Hayward, CA	06	California	001	Alameda	37.743065	-122.169935
04/02/2014	AQS	060010009	3	2	ug/m3 LC	8	Oakland	1	100.0000	88101	PM2.5 - Local Conditions	41860	San Francisco-Oakland-Hayward, CA	06	California	001	Alameda	37.743065	-122.169935
04/03/2014	AQS	060010009	3	5.4	ug/m3 LC	23	Oakland	1	100.0000	88101	PM2.5 - Local Conditions	41860	San Francisco-Oakland-Hayward, CA	06	California	001	Alameda	37.743065	-122.169935
04/04/2014	AQS	060010009	3	3.8	ug/m3 LC	16	Oakland	1	100.0000	88101	PM2.5 - Local Conditions	41860	San Francisco-Oakland-Hayward, CA	06	California	001	Alameda	37.743065	-122.169935
04/05/2014	AQS	060010009	3	6	ug/m3 LC	25	Oakland	1	100.0000	88101	PM2.5 - Local Conditions	41860	San Francisco-Oakland-Hayward, CA	06	California	001	Alameda	37.743065	-122.169935
04/06/2014	AQS	060010009	3	8.8	ug/m3 LC	37	Oakland	1	100.0000	88101	PM2.5 - Local Conditions	41860	San Francisco-Oakland-Hayward, CA	06	California	001	Alameda	37.743065	-122.169935
04/07/2014	AQS	060010009	3	8.7	ug/m3 LC	36	Oakland	1	100.0000	88101	PM2.5 - Local Conditions	41860	San Francisco-Oakland-Hayward, CA	06	California	001	Alameda	37.743065	-122.169935
04/08/2014	AQS	060010009	3	11.4	ug/m3 LC	48	Oakland	1	100.0000	88101	PM2.5 - Local Conditions	41860	San Francisco-Oakland-Hayward, CA	06	California	001	Alameda	37.743065	-122.169935
04/09/2014	AQS	060010009	3	6	ug/m3 LC	25	Oakland	1	100.0000	88101	PM2.5 - Local Conditions	41860	San Francisco-Oakland-Hayward, CA	06	California	001	Alameda	37.743065	-122.169935
04/10/2014	AQS	060010009	3	11.2	ug/m3 LC	47	Oakland	1	100.0000	88101	PM2.5 - Local Conditions	41860	San Francisco-Oakland-Hayward, CA	06	California	001	Alameda	37.743065	-122.169935
04/11/2014	AQS	060010009	3	9.9	ug/m3 LC	41	Oakland	1	100.0000	88101	PM2.5 - Local Conditions	41860	San Francisco-Oakland-Hayward, CA	06	California	001	Alameda	37.743065	-122.169935
04/12/2014	AQS	060010009	3	8.7	ug/m3 LC	36	Oakland	1	100.0000	88101	PM2.5 - Local Conditions	41860	San Francisco-Oakland-Hayward, CA	06	California	001	Alameda	37.743065	-122.169935
04/13/2014	AQS	060010009	3	9.9	ug/m3 LC	41	Oakland	1	100.0000	88101	PM2.5 - Local Conditions	41860	San Francisco-Oakland-Hayward, CA	06	California	001	Alameda	37.743065	-122.169935
04/14/2014	AQS	060010009	3	11.3	ug/m3 LC	47	Oakland	1	100.0000	88101	PM2.5 - Local Conditions	41860	San Francisco-Oakland-Hayward, CA	06	California	001	Alameda	37.743065	-122.169935
04/15/2014	AQS	060010009	3	12.7	ug/m3 LC	52	Oakland	1	100.0000	88101	PM2.5 - Local Conditions	41860	San Francisco-Oakland-Hayward, CA	06	California	001	Alameda	37.743065	-122.169935
04/16/2014	AQS	060010009	3	14.3	ug/m3 LC	56	Oakland	1	100.0000	88101	PM2.5 - Local Conditions	41860	San Francisco-Oakland-Hayward, CA	06	California	001	Alameda	37.743065	-122.169935
04/17/2014	AQS	060010009	3	11	ug/m3 LC	46	Oakland	1	100.0000	88101	PM2.5 - Local Conditions	41860	San Francisco-Oakland-Hayward, CA	06	California	001	Alameda	37.743065	-122.169935
04/18/2014	AQS	060010009	3	7.2	ug/m3 LC	30	Oakland	1	100.0000	88101	PM2.5 - Local Conditions	41860	San Francisco-Oakland-Hayward, CA	06	California	001	Alameda	37.743065	-122.169935
04/19/2014	AQS	060010009	3	5.1	ug/m3 LC	21	Oakland	1	100.0000	88101	PM2.5 - Local Conditions	41860	San Francisco-Oakland-Hayward, CA	06	California	001	Alameda	37.743065	-122.169935
04/20/2014	AQS	060010009	3	8.3	ug/m3 LC	35	Oakland	1	100.0000	88101	PM2.5 - Local Conditions	41860	San Francisco-Oakland-Hayward, CA	06	California	001	Alameda	37.743065	-122.169935
04/21/2014	AQS	060010009	3	12.8	ug/m3 LC	52	Oakland	1	100.0000	88101	PM2.5 - Local Conditions	41860	San Francisco-Oakland-Hayward, CA	06	California	001	Alameda	37.743065	-122.169935
04/22/2014	AQS	060010009	3	3.4	ug/m3 LC	14	Oakland	1	100.0000	88101	PM2.5 - Local Conditions	41860	San Francisco-Oakland-Hayward, CA	06	California	001	Alameda	37.743065	-122.169935
04/23/2014	AQS	060010009	3	4.1	ug/m3 LC	17	Oakland	1	100.0000	88101	PM2.5 - Local Conditions	41860	San Francisco-Oakland-Hayward, CA	06	California	001	Alameda	37.743065	-122.169935
04/24/2014	AQS	060010009	3	6.3	ug/m3 LC	26	Oakland	1	100.0000	88101	PM2.5 - Local Conditions	41860	San Francisco-Oakland-Hayward, CA	06	California	001	Alameda	37.743065	-122.169935
04/25/2014	AQS	060010009	3	2.8	ug/m3 LC	12	Oakland	1	100.0000	88101	PM2.5 - Local Conditions	41860	San Francisco-Oakland-Hayward, CA	06	California	001	Alameda	37.743065	-122.169935
04/26/2014	AQS	060010009	3	3.1	ug/m3 LC	13	Oakland	1	100.0000	88101	PM2.5 - Local Conditions	41860	San Francisco-Oakland-Hayward, CA	06	California	001	Alameda	37.743065	-122.169935
04/27/2014	AQS	060010009	3	4.9	ug/m3 LC	20	Oakland	1	100.0000	88101	PM2.5 - Local Conditions	41860	San Francisco-Oakland-Hayward, CA	06	California	001	Alameda	37.743065	-122.169935
04/28/2014	AQS	060010009	3	8.9	ug/m3 LC	37	Oakland	1	100.0000	88101	PM2.5 - Local Conditions	41860	San Francisco-Oakland-Hayward, CA	06	California	001	Alameda	37.743065	-122.169935
04/29/2014	AQS	060010009	3	8.7	ug/m3 LC	36	Oakland	1	100.0000	88101	PM2.5 - Local Conditions	41860	San Francisco-Oakland-Hayward, CA	06	California	001	Alameda	37.743065	-122.169935
04/30/2014	AQS	060010009	3	6.7	ug/m3 LC	28	Oakland	1	100.0000	88101	PM2.5 - Local Conditions	41860	San Francisco-Oakland-Hayward, CA	06	California	001	Alameda	37.743065	-122.169935
05/01/2014	AQS	060010009	3	9.1	ug/m3 LC	38	Oakland	1	100.0000	88101	PM2.5 - Local Conditions	41860	San Francisco-Oakland-Hayward, CA	06	California	001	Alameda	37.743065	-122.169935
05/02/2014	AQS	060010009	3	6.6	ug/m3 LC	28	Oakland	1	100.0000	88101	PM2.5 - Local Conditions	41860	San Francisco-Oakland-Hayward, CA	06	California	001	Alameda	37.743065	-122.169935
05/03/2014	AQS	060010009	3	4.2	ug/m3 LC	18	Oakland	1	100.0000	88101	PM2.5 - Local Conditions	41860	San Francisco-Oakland-Hayward, CA	06	California	001	Alameda	37.743065	-122.169935
05/04/2014	AQS	060010009	3	2.3	ug/m3 LC	10	Oakland	1	100.0000	88101	PM2.5 - Local Conditions	41860	San Francisco-Oakland-Hayward, CA	06	California	001	Alameda	37.743065	-122.169935
05/05/2014	AQS	060010009	3	4.2	ug/m3 LC	18	Oakland	1	100.0000	88101	PM2.5 - Local Conditions	41860	San Francisco-Oakland-Hayward, CA	06	California	001	Alameda	37.743065	-122.169935
05/06/2014	AQS	060010009	3	7	ug/m3 LC	29	Oakland	1	100.0000	88101	PM2.5 - Local Conditions	41860	San Francisco-Oakland-Hayward, CA	06	California	001	Alameda	37.743065	-122.169935
05/07/2014	AQS	060010009	3	8.9	ug/m3 LC	37	Oakland	1	100.0000	88101	PM2.5 - Local Conditions	41860	San Francisco-Oakland-Hayward, CA	06	California	001	Alameda	37.743065	-122.169935
05/08/2014	AQS	060010009	3	4.6	ug/m3 LC	19	Oakland	1	100.0000	88101	PM2.5 - Local Conditions	41860	San Francisco-Oakland-Hayward, CA	06	California	001	Alameda	37.743065	-122.169935
05/09/2014	AQS	060010009	3	3.3	ug/m3 LC	14	Oakland	1	100.0000	88101	PM2.5 - Local Conditions	41860	San Francisco-Oakland-Hayward, CA	06	California	001	Alameda	37.743065	-122.169935
05/10/2014	AQS	060010009	3	4.7	ug/m3 LC	20	Oakland	1	100.0000	88101	PM2.5 - Local Conditions	41860	San Francisco-Oakland-Hayward, CA	06	California	001	Alameda	37.743065	-122.169935
05/11/2014	AQS	060010009	3	4.5	ug/m3 LC	19	Oakland	1	100.0000	88101	PM2.5 - Local Conditions	41860	San Francisco-Oakland-Hayward, CA	06	California	001	Alameda	37.743065	-122.169935
05/12/2014	AQS	060010009	3	6.7	ug/m3 LC	28	Oakland	1	100.0000	88101	PM2.5 - Local Conditions	41860	San Francisco-Oakland-Hayward, CA	06	California	001	Alameda	37.743065	-122.169935
05/13/2014	AQS	060010009	3	8.2	ug/m3 LC	34	Oakland	1	100.0000	88101	PM2.5 - Local Conditions	41860	San Francisco-Oakland-Hayward, CA	06	California	001	Alameda	37.743065	-122.169935
05/14/2014	AQS	060010009	3	9.5	ug/m3 LC	40	Oakland	1	100.0000	88101	PM2.5 - Local Conditions	41860	San Francisco-Oakland-Hayward, CA	06	California	001	Alameda	37.743065	-122.169935
05/15/2014	AQS	060010009	3	7.6	ug/m3 LC	32	Oakland	1	100.0000	88101	PM2.5 - Local Conditions	41860	San Francisco-Oakland-Hayward, CA	06	California	001	Alameda	37.743065	-122.169935
05/16/2014	AQS	060010009	3	8.5	ug/m3 LC	35	Oakland	1	100.0000	88101	PM2.5 - Local Conditions	41860	San Francisco-Oakland-Hayward, CA	06	California	001	Alameda	37.743065	-122.169935
05/17/2014	AQS	060010009	3	6.5	ug/m3 LC	27	Oakland	1	100.0000	88101	PM2.5 - Local Conditions	41860	San Francisco-Oakland-Hayward, CA	06	California	001	Alameda	37.743065	-122.169935
05/18/2014	AQS	060010009	3	4.7	ug/m3 LC	20	Oakland	1	100.0000	88101	PM2.5 - Local Conditions	41860	San Francisco-Oakland-Hayward, CA	06	California	001	Alameda	37.743065	-122.169935
05/19/2014	AQS	060010009	3	2	ug/m3 LC	8	Oakland	1	100.0000	88101	PM2.5 - Local Conditions	41860	San Francisco-Oakland-Hayward, CA	06	California	001	Alameda	37.743065	-122.169935
05/20/2014	AQS	060010009	3	4.7	ug/m3 LC	20	Oakland	1	100.0000	88101	PM2.5 - Local Conditions	41860	San Francisco-Oakland-Hayward, CA	06	California	001	Alameda	37.743065	-122.169935
05/21/2014	AQS	060010009	3	10	ug/m3 LC	42	Oakland	1	100.0000	88101	PM2.5 - Local Conditions	41860	San Francisco-Oakland-Hayward, CA	06	California	001	Alameda	37.743065	-122.169935
05/22/2014	AQS	060010009	3	5	ug/m3 LC	21	Oakland	1	100.0000	88101	PM2.5 - Local Conditions	41860	San Francisco-Oakland-Hayward, CA	06	California	001	Alameda	37.743065	-122.169935
05/23/2014	AQS	060010009	3	4	ug/m3 LC	17	Oakland	1	100.0000	88101	PM2.5 - Local Conditions	41860	San Francisco-Oakland-Hayward, CA	06	California	001	Alameda	37.743065	-122.169935
05/24/2014	AQS	060010009	3	6.9	ug/m3 LC	29	Oakland	1	100.0000	88101	PM2.5 - Local Conditions	41860	San Francisco-Oakland-Hayward, CA	06	California	001	Alameda	37.743065	-122.169935
05/25/2014	AQS	060010009	3	13	ug/m3 LC	53	Oakland	1	100.0000	88101	PM2.5 - Local Conditions	41860	San Francisco-Oakland-Hayward, CA	06	California	001	Alameda	37.743065	-122.169935
05/26/2014	AQS	060010009	3	7.2	ug/m3 LC	30	Oakland	1	100.0000	88101	PM2.5 - Local Conditions	41860	San Francisco-Oakland-Hayward, CA	06	California	001	Alameda	37.743065	-122.169935
05/27/2014	AQS	060010009	3	10	ug/m3 LC	42	Oakland	1	100.0000	88101	PM2.5 - Local Conditions	41860	San Francisco-Oakland-Hayward, CA	06	California	001	Alameda	37.743065	-122.169935
05/28/2014	AQS	060010009	3	7.6	ug/m3 LC	32	Oakland	1	100.0000	88101	PM2.5 - Local Conditions	41860	San Francisco-Oakland-Hayward, CA	06	California	001	Alameda	37.743065	-122.169935
05/29/2014	AQS	060010009	3	7.8	ug/m3 LC	33	Oakland	1	100.0000	88101	PM2.5 - Local Conditions	41860	San Francisco-Oakland-Hayward, CA	06	California	001	Alameda	37.743065	-122.169935
05/30/2014	AQS	060010009	3	14.1	ug/m3 LC	55	Oakland	1	100.0000	88101	PM2.5 - Local Conditions	41860	San Francisco-Oakland-Hayward, CA	06	California	001	Alameda	37.743065	-122.169935
05/31/2014	AQS	060010009	3	9.2	ug/m3 LC	38	Oakland	1	100.0000	88101	PM2.5 - Local Conditions	41860	San Francisco-Oakland-Hayward, CA	06	California	001	Alameda	37.743065	-122.169935
06/01/2014	AQS	060010009	3	11.1	ug/m3 LC	46	Oakland	1	100.0000	88101	PM2.5 - Local Conditions	41860	San Francisco-Oakland-Hayward, CA	06	California	001	Alameda	37.743065	-122.169935
06/02/2014	AQS	060010009	3	3.4	ug/m3 LC	14	Oakland	1	100.0000	88101	PM2.5 - Local Conditions	41860	San Francisco-Oakland-Hayward, CA	06	California	001	Alameda	37.743065	-122.169935
06/03/2014	AQS	060010009	3	5.4	ug/m3 LC	23	Oakland	1	100.0000	88101	PM2.5 - Local Conditions	41860	San Francisco-Oakland-Hayward, CA	06	California	001	Alameda	37.743065	-122.169935
06/04/2014	AQS	060010009	3	12.7	ug/m3 LC	52	Oakland	1	100.0000	88101	PM2.5 - Local Conditions	41860	San Francisco-Oakland-Hayward, CA	06	California	001	Alameda	37.743065	-122.169935
06/05/2014	AQS	060010009	3	15.1	ug/m3 LC	57	Oakland	1	100.0000	88101	PM2.5 - Local Conditions	41860	San Francisco-Oakland-Hayward, CA	06	California	001	Alameda	37.743065	-122.169935
06/10/2014	AQS	060010009	3	6	ug/m3 LC	25	Oakland	1	100.0000	88101	PM2.5 - Local Conditions	41860	San Francisco-Oakland-Hayward, CA	06	California	001	Alameda	37.743065	-122.169935
06/11/2014	AQS	060010009	3	6.4	ug/m3 LC	27	Oakland	1	100.0000	88101	PM2.5 - Local Conditions	41860	San Francisco-Oakland-Hayward, CA	06	California	001	Alameda	37.743065	-122.169935
06/12/2014	AQS	060010009	3	4.9	ug/m3 LC	20	Oakland	1	100.0000	88101	PM2.5 - Local Conditions	41860	San Francisco-Oakland-Hayward, CA	06	California	001	Alameda	37.743065	-122.169935
06/13/2014	AQS	060010009	3	10.6	ug/m3 LC	44	Oakland	1	100.0000	88101	PM2.5 - Local Conditions	41860	San Francisco-Oakland-Hayward, CA	06	California	001	Alameda	37.743065	-122.169935
06/14/2014	AQS	060010009	3	13.2	ug/m3 LC	53	Oakland	1	100.0000	88101	PM2.5 - Local Conditions	41860	San Francisco-Oakland-Hayward, CA	06	California	001	Alameda	37.743065	-122.169935
06/15/2014	AQS	060010009	3	14.3	ug/m3 LC	56	Oakland	1	100.0000	88101	PM2.5 - Local Conditions	41860	San Francisco-Oakland-Hayward, CA	06	California	001	Alameda	37.743065	-122.169935
06/16/2014	AQS	060010009	3	9.6	ug/m3 LC	40	Oakland	1	100.0000	88101	PM2.5 - Local Conditions	41860	San Francisco-Oakland-Hayward, CA	06	California	001	Alameda	37.743065	-122.169935
06/17/2014	AQS	060010009	3	8.9	ug/m3 LC	37	Oakland	1	100.0000	88101	PM2.5 - Local Conditions	41860	San Francisco-Oakland-Hayward, CA	06	California	001	Alameda	37.743065	-122.169935
06/18/2014	AQS	060010009	3	9.8	ug/m3 LC	41	Oakland	1	100.0000	88101	PM2.5 - Local Conditions	41860	San Francisco-Oakland-Hayward, CA	06	California	001	Alameda	37.743065	-122.169935
06/19/2014	AQS	060010009	3	10.1	ug/m3 LC	42	Oakland	1	100.0000	88101	PM2.5 - Local Conditions	41860	San Francisco-Oakland-Hayward, CA	06	California	001	Alameda	37.743065	-122.169935
06/20/2014	AQS	060010009	3	8.2	ug/m3 LC	34	Oakland	1	100.0000	88101	PM2.5 - Local Conditions	41860	San Francisco-Oakland-Hayward, CA	06	California	001	Alameda	37.743065	-122.169935
06/21/2014	AQS	060010009	3	12.5	ug/m3 LC	52	Oakland	1	100.0000	88101	PM2.5 - Local Conditions	41860	San Francisco-Oakland-Hayward, CA	06	California	001	Alameda	37.743065	-122.169935
06/22/2014	AQS	060010009	3	11.3	ug/m3 LC	47	Oakland	1	100.0000	88101	PM2.5 - Local Conditions	41860	San Francisco-Oakland-Hayward, CA	06	California	001	Alameda	37.743065	-122.169935
06/23/2014	AQS	060010009	3	11.2	ug/m3 LC	47	Oakland	1	100.0000	88101	PM2.5 - Local Conditions	41860	San Francisco-Oakland-Hayward, CA	06	California	001	Alameda	37.743065	-122.169935
06/24/2014	AQS	060010009	3	8.1	ug/m3 LC	34	Oakland	1	100.0000	88101	PM2.5 - Local Conditions	41860	San Francisco-Oakland-Hayward, CA	06	California	001	Alameda	37.743065	-122.169935
06/25/2014	AQS	060010009	3	3.1	ug/m3 LC	13	Oakland	1	100.0000	88101	PM2.5 - Local Conditions	41860	San Francisco-Oakland-Hayward, CA	06	California	001	Alameda	37.743065	-122.169935
06/26/2014	AQS	060010009	3	3.2	ug/m3 LC	13	Oakland	1	100.0000	88101	PM2.5 - Local Conditions	41860	San Francisco-Oakland-Hayward, CA	06	California	001	Alameda	37.743065	-122.169935
06/27/2014	AQS	060010009	3	3.6	ug/m3 LC	15	Oakland	1	100.0000	88101	PM2.5 - Local Conditions	41860	San Francisco-Oakland-Hayward, CA	06	California	001	Alameda	37.743065	-122.169935
06/28/2014	AQS	060010009	3	4.7	ug/m3 LC	20	Oakland	1	100.0000	88101	PM2.5 - Local Conditions	41860	San Francisco-Oakland-Hayward, CA	06	California	001	Alameda	37.743065	-122.169935
06/29/2014	AQS	060010009	3	10	ug/m3 LC	42	Oakland	1	100.0000	88101	PM2.5 - Local Conditions	41860	San Francisco-Oakland-Hayward, CA	06	California	001	Alameda	37.743065	-122.169935
06/30/2014	AQS	060010009	3	15.8	ug/m3 LC	59	Oakland	1	100.0000	88101	PM2.5 - Local Conditions	41860	San Francisco-Oakland-Hayward, CA	06	California	001	Alameda	37.743065	-122.169935
07/01/2014	AQS	060010009	3	6.6	ug/m3 LC	28	Oakland	1	100.0000	88101	PM2.5 - Local Conditions	41860	San Francisco-Oakland-Hayward, CA	06	California	001	Alameda	37.743065	-122.169935
07/02/2014	AQS	060010009	3	5.5	ug/m3 LC	23	Oakland	1	100.0000	88101	PM2.5 - Local Conditions	41860	San Francisco-Oakland-Hayward, CA	06	California	001	Alameda	37.743065	-122.169935
07/03/2014	AQS	060010009	3	10.2	ug/m3 LC	43	Oakland	1	100.0000	88101	PM2.5 - Local Conditions	41860	San Francisco-Oakland-Hayward, CA	06	California	001	Alameda	37.743065	-122.169935
07/04/2014	AQS	060010009	3	16	ug/m3 LC	59	Oakland	1	100.0000	88101	PM2.5 - Local Conditions	41860	San Francisco-Oakland-Hayward, CA	06	California	001	Alameda	37.743065	-122.169935
07/05/2014	AQS	060010009	3	10.2	ug/m3 LC	43	Oakland	1	100.0000	88101	PM2.5 - Local Conditions	41860	San Francisco-Oakland-Hayward, CA	06	California	001	Alameda	37.743065	-122.169935
07/06/2014	AQS	060010009	3	7.6	ug/m3 LC	32	Oakland	1	100.0000	88101	PM2.5 - Local Conditions	41860	San Francisco-Oakland-Hayward, CA	06	California	001	Alameda	37.743065	-122.169935
07/07/2014	AQS	060010009	3	7.7	ug/m3 LC	32	Oakland	1	100.0000	88101	PM2.5 - Local Conditions	41860	San Francisco-Oakland-Hayward, CA	06	California	001	Alameda	37.743065	-122.169935
07/08/2014	AQS	060010009	3	4.3	ug/m3 LC	18	Oakland	1	100.0000	88101	PM2.5 - Local Conditions	41860	San Francisco-Oakland-Hayward, CA	06	California	001	Alameda	37.743065	-122.169935
07/09/2014	AQS	060010009	3	5.8	ug/m3 LC	24	Oakland	1	100.0000	88101	PM2.5 - Local Conditions	41860	San Francisco-Oakland-Hayward, CA	06	California	001	Alameda	37.743065	-122.169935
07/10/2014	AQS	060010009	3	3.8	ug/m3 LC	16	Oakland	1	100.0000	88101	PM2.5 - Local Conditions	41860	San Francisco-Oakland-Hayward, CA	06	California	001	Alameda	37.743065	-122.169935
07/11/2014	AQS	060010009	3	2.6	ug/m3 LC	11	Oakland	1	100.0000	88101	PM2.5 - Local Conditions	41860	San Francisco-Oakland-Hayward, CA	06	California	001	Alameda	37.743065	-122.169935
07/12/2014	AQS	060010009	3	2.7	ug/m3 LC	11	Oakland	1	100.0000	88101	PM2.5 - Local Conditions	41860	San Francisco-Oakland-Hayward, CA	06	California	001	Alameda	37.743065	-122.169935
07/13/2014	AQS	060010009	3	6.2	ug/m3 LC	26	Oakland	1	100.0000	88101	PM2.5 - Local Conditions	41860	San Francisco-Oakland-Hayward, CA	06	California	001	Alameda	37.743065	-122.169935
07/14/2014	AQS	060010009	3	14.3	ug/m3 LC	56	Oakland	1	100.0000	88101	PM2.5 - Local Conditions	41860	San Francisco-Oakland-Hayward, CA	06	California	001	Alameda	37.743065	-122.169935
07/15/2014	AQS	060010009	3	7.5	ug/m3 LC	31	Oakland	1	100.0000	88101	PM2.5 - Local Conditions	41860	San Francisco-Oakland-Hayward, CA	06	California	001	Alameda	37.743065	-122.169935
07/16/2014	AQS	060010009	3	4.9	ug/m3 LC	20	Oakland	1	100.0000	88101	PM2.5 - Local Conditions	41860	San Francisco-Oakland-Hayward, CA	06	California	001	Alameda	37.743065	-122.169935
07/17/2014	AQS	060010009	3	4.2	ug/m3 LC	18	Oakland	1	100.0000	88101	PM2.5 - Local Conditions	41860	San Francisco-Oakland-Hayward, CA	06	California	001	Alameda	37.743065	-122.169935
07/18/2014	AQS	060010009	3	2.7	ug/m3 LC	11	Oakland	1	100.0000	88101	PM2.5 - Local Conditions	41860	San Francisco-Oakland-Hayward, CA	06	California	001	Alameda	37.743065	-122.169935
07/19/2014	AQS	060010009	3	4.5	ug/m3 LC	19	Oakland	1	100.0000	88101	PM2.5 - Local Conditions	41860	San Francisco-Oakland-Hayward, CA	06	California	001	Alameda	37.743065	-122.169935
07/20/2014	AQS	060010009	3	3.4	ug/m3 LC	14	Oakland	1	100.0000	88101	PM2.5 - Local Conditions	41860	San Francisco-Oakland-Hayward, CA	06	California	001	Alameda	37.743065	-122.169935
07/21/2014	AQS	060010009	3	2.6	ug/m3 LC	11	Oakland	1	100.0000	88101	PM2.5 - Local Conditions	41860	San Francisco-Oakland-Hayward, CA	06	California	001	Alameda	37.743065	-122.169935
07/22/2014	AQS	060010009	3	3	ug/m3 LC	13	Oakland	1	100.0000	88101	PM2.5 - Local Conditions	41860	San Francisco-Oakland-Hayward, CA	06	California	001	Alameda	37.743065	-122.169935
07/23/2014	AQS	060010009	3	3.5	ug/m3 LC	15	Oakland	1	100.0000	88101	PM2.5 - Local Conditions	41860	San Francisco-Oakland-Hayward, CA	06	California	001	Alameda	37.743065	-122.169935
07/24/2014	AQS	060010009	3	7.9	ug/m3 LC	33	Oakland	1	100.0000	88101	PM2.5 - Local Conditions	41860	San Francisco-Oakland-Hayward, CA	06	California	001	Alameda	37.743065	-122.169935
07/25/2014	AQS	060010009	3	14.6	ug/m3 LC	56	Oakland	1	100.0000	88101	PM2.5 - Local Conditions	41860	San Francisco-Oakland-Hayward, CA	06	California	001	Alameda	37.743065	-122.169935
07/26/2014	AQS	060010009	3	14.2	ug/m3 LC	55	Oakland	1	100.0000	88101	PM2.5 - Local Conditions	41860	San Francisco-Oakland-Hayward, CA	06	California	001	Alameda	37.743065	-122.169935
07/27/2014	AQS	060010009	3	12.2	ug/m3 LC	51	Oakland	1	100.0000	88101	PM2.5 - Local Conditions	41860	San Francisco-Oakland-Hayward, CA	06	California	001	Alameda	37.743065	-122.169935
07/28/2014	AQS	060010009	3	8.9	ug/m3 LC	37	Oakland	1	100.0000	88101	PM2.5 - Local Conditions	41860	San Francisco-Oakland-Hayward, CA	06	California	001	Alameda	37.743065	-122.169935
07/29/2014	AQS	060010009	3	8.3	ug/m3 LC	35	Oakland	1	100.0000	88101	PM2.5 - Local Conditions	41860	San Francisco-Oakland-Hayward, CA	06	California	001	Alameda	37.743065	-122.169935
07/30/2014	AQS	060010009	3	7.5	ug/m3 LC	31	Oakland	1	100.0000	88101	PM2.5 - Local Conditions	41860	San Francisco-Oakland-Hayward, CA	06	California	001	Alameda	37.743065	-122.169935
07/31/2014	AQS	060010009	3	8.2	ug/m3 LC	34	Oakland	1	100.0000	88101	PM2.5 - Local Conditions	41860	San Francisco-Oakland-Hayward, CA	06	California	001	Alameda	37.743065	-122.169935
08/01/2014	AQS	060010009	3	10.7	ug/m3 LC	45	Oakland	1	100.0000	88101	PM2.5 - Local Conditions	41860	San Francisco-Oakland-Hayward, CA	06	California	001	Alameda	37.743065	-122.169935
08/02/2014	AQS	060010009	3	7.9	ug/m3 LC	33	Oakland	1	100.0000	88101	PM2.5 - Local Conditions	41860	San Francisco-Oakland-Hayward, CA	06	California	001	Alameda	37.743065	-122.169935
08/03/2014	AQS	060010009	3	6.3	ug/m3 LC	26	Oakland	1	100.0000	88101	PM2.5 - Local Conditions	41860	San Francisco-Oakland-Hayward, CA	06	California	001	Alameda	37.743065	-122.169935
08/04/2014	AQS	060010009	3	6	ug/m3 LC	25	Oakland	1	100.0000	88101	PM2.5 - Local Conditions	41860	San Francisco-Oakland-Hayward, CA	06	California	001	Alameda	37.743065	-122.169935
08/05/2014	AQS	060010009	3	6.8	ug/m3 LC	28	Oakland	1	100.0000	88101	PM2.5 - Local Conditions	41860	San Francisco-Oakland-Hayward, CA	06	California	001	Alameda	37.743065	-122.169935
08/06/2014	AQS	060010009	3	7.9	ug/m3 LC	33	Oakland	1	100.0000	88101	PM2.5 - Local Conditions	41860	San Francisco-Oakland-Hayward, CA	06	California	001	Alameda	37.743065	-122.169935
08/07/2014	AQS	060010009	3	9	ug/m3 LC	38	Oakland	1	100.0000	88101	PM2.5 - Local Conditions	41860	San Francisco-Oakland-Hayward, CA	06	California	001	Alameda	37.743065	-122.169935
08/08/2014	AQS	060010009	3	14.8	ug/m3 LC	57	Oakland	1	100.0000	88101	PM2.5 - Local Conditions	41860	San Francisco-Oakland-Hayward, CA	06	California	001	Alameda	37.743065	-122.169935
08/09/2014	AQS	060010009	3	10.2	ug/m3 LC	43	Oakland	1	100.0000	88101	PM2.5 - Local Conditions	41860	San Francisco-Oakland-Hayward, CA	06	California	001	Alameda	37.743065	-122.169935
08/10/2014	AQS	060010009	3	5.3	ug/m3 LC	22	Oakland	1	100.0000	88101	PM2.5 - Local Conditions	41860	San Francisco-Oakland-Hayward, CA	06	California	001	Alameda	37.743065	-122.169935
08/11/2014	AQS	060010009	3	7.6	ug/m3 LC	32	Oakland	1	100.0000	88101	PM2.5 - Local Conditions	41860	San Francisco-Oakland-Hayward, CA	06	California	001	Alameda	37.743065	-122.169935
08/12/2014	AQS	060010009	3	5.2	ug/m3 LC	22	Oakland	1	100.0000	88101	PM2.5 - Local Conditions	41860	San Francisco-Oakland-Hayward, CA	06	California	001	Alameda	37.743065	-122.169935
08/13/2014	AQS	060010009	3	4.7	ug/m3 LC	20	Oakland	1	100.0000	88101	PM2.5 - Local Conditions	41860	San Francisco-Oakland-Hayward, CA	06	California	001	Alameda	37.743065	-122.169935
08/14/2014	AQS	060010009	3	4	ug/m3 LC	17	Oakland	1	100.0000	88101	PM2.5 - Local Conditions	41860	San Francisco-Oakland-Hayward, CA	06	California	001	Alameda	37.743065	-122.169935
08/15/2014	AQS	060010009	3	8	ug/m3 LC	33	Oakland	1	100.0000	88101	PM2.5 - Local Conditions	41860	San Francisco-Oakland-Hayward, CA	06	California	001	Alameda	37.743065	-122.169935
08/16/2014	AQS	060010009	3	10	ug/m3 LC	42	Oakland	1	100.0000	88101	PM2.5 - Local Conditions	41860	San Francisco-Oakland-Hayward, CA	06	California	001	Alameda	37.743065	-122.169935
08/17/2014	AQS	060010009	3	5.5	ug/m3 LC	23	Oakland	1	100.0000	88101	PM2.5 - Local Conditions	41860	San Francisco-Oakland-Hayward, CA	06	California	001	Alameda	37.743065	-122.169935
08/18/2014	AQS	060010009	3	6	ug/m3 LC	25	Oakland	1	100.0000	88101	PM2.5 - Local Conditions	41860	San Francisco-Oakland-Hayward, CA	06	California	001	Alameda	37.743065	-122.169935
08/19/2014	AQS	060010009	3	3.6	ug/m3 LC	15	Oakland	1	100.0000	88101	PM2.5 - Local Conditions	41860	San Francisco-Oakland-Hayward, CA	06	California	001	Alameda	37.743065	-122.169935
08/20/2014	AQS	060010009	3	3.8	ug/m3 LC	16	Oakland	1	100.0000	88101	PM2.5 - Local Conditions	41860	San Francisco-Oakland-Hayward, CA	06	California	001	Alameda	37.743065	-122.169935
08/21/2014	AQS	060010009	3	6.1	ug/m3 LC	25	Oakland	1	100.0000	88101	PM2.5 - Local Conditions	41860	San Francisco-Oakland-Hayward, CA	06	California	001	Alameda	37.743065	-122.169935
08/22/2014	AQS	060010009	3	5.5	ug/m3 LC	23	Oakland	1	100.0000	88101	PM2.5 - Local Conditions	41860	San Francisco-Oakland-Hayward, CA	06	California	001	Alameda	37.743065	-122.169935
08/23/2014	AQS	060010009	3	5.4	ug/m3 LC	23	Oakland	1	100.0000	88101	PM2.5 - Local Conditions	41860	San Francisco-Oakland-Hayward, CA	06	California	001	Alameda	37.743065	-122.169935
08/24/2014	AQS	060010009	3	5.2	ug/m3 LC	22	Oakland	1	100.0000	88101	PM2.5 - Local Conditions	41860	San Francisco-Oakland-Hayward, CA	06	California	001	Alameda	37.743065	-122.169935
08/25/2014	AQS	060010009	3	5.8	ug/m3 LC	24	Oakland	1	100.0000	88101	PM2.5 - Local Conditions	41860	San Francisco-Oakland-Hayward, CA	06	California	001	Alameda	37.743065	-122.169935
08/26/2014	AQS	060010009	3	7.2	ug/m3 LC	30	Oakland	1	100.0000	88101	PM2.5 - Local Conditions	41860	San Francisco-Oakland-Hayward, CA	06	California	001	Alameda	37.743065	-122.169935
08/27/2014	AQS	060010009	3	9	ug/m3 LC	38	Oakland	1	100.0000	88101	PM2.5 - Local Conditions	41860	San Francisco-Oakland-Hayward, CA	06	California	001	Alameda	37.743065	-122.169935
08/28/2014	AQS	060010009	3	8.1	ug/m3 LC	34	Oakland	1	100.0000	88101	PM2.5 - Local Conditions	41860	San Francisco-Oakland-Hayward, CA	06	California	001	Alameda	37.743065	-122.169935
08/29/2014	AQS	060010009	3	6.1	ug/m3 LC	25	Oakland	1	100.0000	88101	PM2.5 - Local Conditions	41860	San Francisco-Oakland-Hayward, CA	06	California	001	Alameda	37.743065	-122.169935
08/30/2014	AQS	060010009	3	7.4	ug/m3 LC	31	Oakland	1	100.0000	88101	PM2.5 - Local Conditions	41860	San Francisco-Oakland-Hayward, CA	06	California	001	Alameda	37.743065	-122.169935
08/31/2014	AQS	060010009	3	7.8	ug/m3 LC	33	Oakland	1	100.0000	88101	PM2.5 - Local Conditions	41860	San Francisco-Oakland-Hayward, CA	06	California	001	Alameda	37.743065	-122.169935
09/01/2014	AQS	060010009	3	12.3	ug/m3 LC	51	Oakland	1	100.0000	88101	PM2.5 - Local Conditions	41860	San Francisco-Oakland-Hayward, CA	06	California	001	Alameda	37.743065	-122.169935
09/02/2014	AQS	060010009	3	7.4	ug/m3 LC	31	Oakland	1	100.0000	88101	PM2.5 - Local Conditions	41860	San Francisco-Oakland-Hayward, CA	06	California	001	Alameda	37.743065	-122.169935
09/03/2014	AQS	060010009	3	9.1	ug/m3 LC	38	Oakland	1	100.0000	88101	PM2.5 - Local Conditions	41860	San Francisco-Oakland-Hayward, CA	06	California	001	Alameda	37.743065	-122.169935
09/04/2014	AQS	060010009	3	12.2	ug/m3 LC	51	Oakland	1	100.0000	88101	PM2.5 - Local Conditions	41860	San Francisco-Oakland-Hayward, CA	06	California	001	Alameda	37.743065	-122.169935
09/05/2014	AQS	060010009	3	17.6	ug/m3 LC	63	Oakland	1	100.0000	88101	PM2.5 - Local Conditions	41860	San Francisco-Oakland-Hayward, CA	06	California	001	Alameda	37.743065	-122.169935
09/06/2014	AQS	060010009	3	22.3	ug/m3 LC	72	Oakland	1	100.0000	88101	PM2.5 - Local Conditions	41860	San Francisco-Oakland-Hayward, CA	06	California	001	Alameda	37.743065	-122.169935
09/07/2014	AQS	060010009	3	14.3	ug/m3 LC	56	Oakland	1	100.0000	88101	PM2.5 - Local Conditions	41860	San Francisco-Oakland-Hayward, CA	06	California	001	Alameda	37.743065	-122.169935
09/08/2014	AQS	060010009	3	10.8	ug/m3 LC	45	Oakland	1	100.0000	88101	PM2.5 - Local Conditions	41860	San Francisco-Oakland-Hayward, CA	06	California	001	Alameda	37.743065	-122.169935
09/09/2014	AQS	060010009	3	9.2	ug/m3 LC	38	Oakland	1	100.0000	88101	PM2.5 - Local Conditions	41860	San Francisco-Oakland-Hayward, CA	06	California	001	Alameda	37.743065	-122.169935
09/10/2014	AQS	060010009	3	12.3	ug/m3 LC	51	Oakland	1	100.0000	88101	PM2.5 - Local Conditions	41860	San Francisco-Oakland-Hayward, CA	06	California	001	Alameda	37.743065	-122.169935
09/11/2014	AQS	060010009	3	12.6	ug/m3 LC	52	Oakland	1	100.0000	88101	PM2.5 - Local Conditions	41860	San Francisco-Oakland-Hayward, CA	06	California	001	Alameda	37.743065	-122.169935
09/12/2014	AQS	060010009	3	12	ug/m3 LC	50	Oakland	1	100.0000	88101	PM2.5 - Local Conditions	41860	San Francisco-Oakland-Hayward, CA	06	California	001	Alameda	37.743065	-122.169935
09/13/2014	AQS	060010009	3	9.7	ug/m3 LC	40	Oakland	1	100.0000	88101	PM2.5 - Local Conditions	41860	San Francisco-Oakland-Hayward, CA	06	California	001	Alameda	37.743065	-122.169935
09/14/2014	AQS	060010009	3	11.7	ug/m3 LC	49	Oakland	1	100.0000	88101	PM2.5 - Local Conditions	41860	San Francisco-Oakland-Hayward, CA	06	California	001	Alameda	37.743065	-122.169935
09/15/2014	AQS	060010009	3	9.3	ug/m3 LC	39	Oakland	1	100.0000	88101	PM2.5 - Local Conditions	41860	San Francisco-Oakland-Hayward, CA	06	California	001	Alameda	37.743065	-122.169935
09/16/2014	AQS	060010009	3	8.5	ug/m3 LC	35	Oakland	1	100.0000	88101	PM2.5 - Local Conditions	41860	San Francisco-Oakland-Hayward, CA	06	California	001	Alameda	37.743065	-122.169935
09/17/2014	AQS	060010009	3	5.5	ug/m3 LC	23	Oakland	1	100.0000	88101	PM2.5 - Local Conditions	41860	San Francisco-Oakland-Hayward, CA	06	California	001	Alameda	37.743065	-122.169935
09/18/2014	AQS	060010009	3	4.2	ug/m3 LC	18	Oakland	1	100.0000	88101	PM2.5 - Local Conditions	41860	San Francisco-Oakland-Hayward, CA	06	California	001	Alameda	37.743065	-122.169935
09/19/2014	AQS	060010009	3	9.3	ug/m3 LC	39	Oakland	1	100.0000	88101	PM2.5 - Local Conditions	41860	San Francisco-Oakland-Hayward, CA	06	California	001	Alameda	37.743065	-122.169935
09/20/2014	AQS	060010009	3	6.3	ug/m3 LC	26	Oakland	1	100.0000	88101	PM2.5 - Local Conditions	41860	San Francisco-Oakland-Hayward, CA	06	California	001	Alameda	37.743065	-122.169935
09/21/2014	AQS	060010009	3	4.4	ug/m3 LC	18	Oakland	1	100.0000	88101	PM2.5 - Local Conditions	41860	San Francisco-Oakland-Hayward, CA	06	California	001	Alameda	37.743065	-122.169935
09/22/2014	AQS	060010009	3	6.1	ug/m3 LC	25	Oakland	1	100.0000	88101	PM2.5 - Local Conditions	41860	San Francisco-Oakland-Hayward, CA	06	California	001	Alameda	37.743065	-122.169935
09/23/2014	AQS	060010009	3	4.2	ug/m3 LC	18	Oakland	1	100.0000	88101	PM2.5 - Local Conditions	41860	San Francisco-Oakland-Hayward, CA	06	California	001	Alameda	37.743065	-122.169935
09/24/2014	AQS	060010009	3	2.6	ug/m3 LC	11	Oakland	1	100.0000	88101	PM2.5 - Local Conditions	41860	San Francisco-Oakland-Hayward, CA	06	California	001	Alameda	37.743065	-122.169935
09/25/2014	AQS	060010009	3	3.9	ug/m3 LC	16	Oakland	1	100.0000	88101	PM2.5 - Local Conditions	41860	San Francisco-Oakland-Hayward, CA	06	California	001	Alameda	37.743065	-122.169935
09/26/2014	AQS	060010009	3	6.7	ug/m3 LC	28	Oakland	1	100.0000	88101	PM2.5 - Local Conditions	41860	San Francisco-Oakland-Hayward, CA	06	California	001	Alameda	37.743065	-122.169935
09/27/2014	AQS	060010009	3	8.2	ug/m3 LC	34	Oakland	1	100.0000	88101	PM2.5 - Local Conditions	41860	San Francisco-Oakland-Hayward, CA	06	California	001	Alameda	37.743065	-122.169935
09/28/2014	AQS	060010009	3	9	ug/m3 LC	38	Oakland	1	100.0000	88101	PM2.5 - Local Conditions	41860	San Francisco-Oakland-Hayward, CA	06	California	001	Alameda	37.743065	-122.169935
09/29/2014	AQS	060010009	3	10.1	ug/m3 LC	42	Oakland	1	100.0000	88101	PM2.5 - Local Conditions	41860	San Francisco-Oakland-Hayward, CA	06	California	001	Alameda	37.743065	-122.169935
09/30/2014	AQS	060010009	3	6.7	ug/m3 LC	28	Oakland	1	100.0000	88101	PM2.5 - Local Conditions	41860	San Francisco-Oakland-Hayward, CA	06	California	001	Alameda	37.743065	-122.169935
10/01/2014	AQS	060010009	3	6.5	ug/m3 LC	27	Oakland	1	100.0000	88101	PM2.5 - Local Conditions	41860	San Francisco-Oakland-Hayward, CA	06	California	001	Alameda	37.743065	-122.169935
10/02/2014	AQS	060010009	3	7.3	ug/m3 LC	30	Oakland	1	100.0000	88101	PM2.5 - Local Conditions	41860	San Francisco-Oakland-Hayward, CA	06	California	001	Alameda	37.743065	-122.169935
10/03/2014	AQS	060010009	3	12.2	ug/m3 LC	51	Oakland	1	100.0000	88101	PM2.5 - Local Conditions	41860	San Francisco-Oakland-Hayward, CA	06	California	001	Alameda	37.743065	-122.169935
10/04/2014	AQS	060010009	3	11.8	ug/m3 LC	49	Oakland	1	100.0000	88101	PM2.5 - Local Conditions	41860	San Francisco-Oakland-Hayward, CA	06	California	001	Alameda	37.743065	-122.169935
10/05/2014	AQS	060010009	3	11.3	ug/m3 LC	47	Oakland	1	100.0000	88101	PM2.5 - Local Conditions	41860	San Francisco-Oakland-Hayward, CA	06	California	001	Alameda	37.743065	-122.169935
10/06/2014	AQS	060010009	3	12.6	ug/m3 LC	52	Oakland	1	100.0000	88101	PM2.5 - Local Conditions	41860	San Francisco-Oakland-Hayward, CA	06	California	001	Alameda	37.743065	-122.169935
10/07/2014	AQS	060010009	3	11.2	ug/m3 LC	47	Oakland	1	100.0000	88101	PM2.5 - Local Conditions	41860	San Francisco-Oakland-Hayward, CA	06	California	001	Alameda	37.743065	-122.169935
10/08/2014	AQS	060010009	3	10.7	ug/m3 LC	45	Oakland	1	100.0000	88101	PM2.5 - Local Conditions	41860	San Francisco-Oakland-Hayward, CA	06	California	001	Alameda	37.743065	-122.169935
10/09/2014	AQS	060010009	3	7.5	ug/m3 LC	31	Oakland	1	100.0000	88101	PM2.5 - Local Conditions	41860	San Francisco-Oakland-Hayward, CA	06	California	001	Alameda	37.743065	-122.169935
10/10/2014	AQS	060010009	3	6.9	ug/m3 LC	29	Oakland	1	100.0000	88101	PM2.5 - Local Conditions	41860	San Francisco-Oakland-Hayward, CA	06	California	001	Alameda	37.743065	-122.169935
10/11/2014	AQS	060010009	3	8.3	ug/m3 LC	35	Oakland	1	100.0000	88101	PM2.5 - Local Conditions	41860	San Francisco-Oakland-Hayward, CA	06	California	001	Alameda	37.743065	-122.169935
10/12/2014	AQS	060010009	3	9.9	ug/m3 LC	41	Oakland	1	100.0000	88101	PM2.5 - Local Conditions	41860	San Francisco-Oakland-Hayward, CA	06	California	001	Alameda	37.743065	-122.169935
10/13/2014	AQS	060010009	3	9.8	ug/m3 LC	41	Oakland	1	100.0000	88101	PM2.5 - Local Conditions	41860	San Francisco-Oakland-Hayward, CA	06	California	001	Alameda	37.743065	-122.169935
10/14/2014	AQS	060010009	3	9.7	ug/m3 LC	40	Oakland	1	100.0000	88101	PM2.5 - Local Conditions	41860	San Francisco-Oakland-Hayward, CA	06	California	001	Alameda	37.743065	-122.169935
10/15/2014	AQS	060010009	3	5.7	ug/m3 LC	24	Oakland	1	100.0000	88101	PM2.5 - Local Conditions	41860	San Francisco-Oakland-Hayward, CA	06	California	001	Alameda	37.743065	-122.169935
10/16/2014	AQS	060010009	3	6.7	ug/m3 LC	28	Oakland	1	100.0000	88101	PM2.5 - Local Conditions	41860	San Francisco-Oakland-Hayward, CA	06	California	001	Alameda	37.743065	-122.169935
10/17/2014	AQS	060010009	3	6.7	ug/m3 LC	28	Oakland	1	100.0000	88101	PM2.5 - Local Conditions	41860	San Francisco-Oakland-Hayward, CA	06	California	001	Alameda	37.743065	-122.169935
10/18/2014	AQS	060010009	3	6.2	ug/m3 LC	26	Oakland	1	100.0000	88101	PM2.5 - Local Conditions	41860	San Francisco-Oakland-Hayward, CA	06	California	001	Alameda	37.743065	-122.169935
10/19/2014	AQS	060010009	3	4.8	ug/m3 LC	20	Oakland	1	100.0000	88101	PM2.5 - Local Conditions	41860	San Francisco-Oakland-Hayward, CA	06	California	001	Alameda	37.743065	-122.169935
10/20/2014	AQS	060010009	3	3.8	ug/m3 LC	16	Oakland	1	100.0000	88101	PM2.5 - Local Conditions	41860	San Francisco-Oakland-Hayward, CA	06	California	001	Alameda	37.743065	-122.169935
10/21/2014	AQS	060010009	3	5.5	ug/m3 LC	23	Oakland	1	100.0000	88101	PM2.5 - Local Conditions	41860	San Francisco-Oakland-Hayward, CA	06	California	001	Alameda	37.743065	-122.169935
10/22/2014	AQS	060010009	3	7.1	ug/m3 LC	30	Oakland	1	100.0000	88101	PM2.5 - Local Conditions	41860	San Francisco-Oakland-Hayward, CA	06	California	001	Alameda	37.743065	-122.169935
10/23/2014	AQS	060010009	3	8.3	ug/m3 LC	35	Oakland	1	100.0000	88101	PM2.5 - Local Conditions	41860	San Francisco-Oakland-Hayward, CA	06	California	001	Alameda	37.743065	-122.169935
10/24/2014	AQS	060010009	3	7	ug/m3 LC	29	Oakland	1	100.0000	88101	PM2.5 - Local Conditions	41860	San Francisco-Oakland-Hayward, CA	06	California	001	Alameda	37.743065	-122.169935
10/25/2014	AQS	060010009	3	6	ug/m3 LC	25	Oakland	1	100.0000	88101	PM2.5 - Local Conditions	41860	San Francisco-Oakland-Hayward, CA	06	California	001	Alameda	37.743065	-122.169935
10/26/2014	AQS	060010009	3	6.9	ug/m3 LC	29	Oakland	1	100.0000	88101	PM2.5 - Local Conditions	41860	San Francisco-Oakland-Hayward, CA	06	California	001	Alameda	37.743065	-122.169935
10/27/2014	AQS	060010009	3	7.6	ug/m3 LC	32	Oakland	1	100.0000	88101	PM2.5 - Local Conditions	41860	San Francisco-Oakland-Hayward, CA	06	California	001	Alameda	37.743065	-122.169935
10/28/2014	AQS	060010009	3	7.2	ug/m3 LC	30	Oakland	1	100.0000	88101	PM2.5 - Local Conditions	41860	San Francisco-Oakland-Hayward, CA	06	California	001	Alameda	37.743065	-122.169935
10/29/2014	AQS	060010009	3	11.1	ug/m3 LC	46	Oakland	1	100.0000	88101	PM2.5 - Local Conditions	41860	San Francisco-Oakland-Hayward, CA	06	California	001	Alameda	37.743065	-122.169935
10/30/2014	AQS	060010009	3	10.9	ug/m3 LC	45	Oakland	1	100.0000	88101	PM2.5 - Local Conditions	41860	San Francisco-Oakland-Hayward, CA	06	California	001	Alameda	37.743065	-122.169935
10/31/2014	AQS	060010009	3	6.4	ug/m3 LC	27	Oakland	1	100.0000	88101	PM2.5 - Local Conditions	41860	San Francisco-Oakland-Hayward, CA	06	California	001	Alameda	37.743065	-122.169935
11/01/2014	AQS	060010009	3	6.3	ug/m3 LC	26	Oakland	1	100.0000	88101	PM2.5 - Local Conditions	41860	San Francisco-Oakland-Hayward, CA	06	California	001	Alameda	37.743065	-122.169935
11/02/2014	AQS	060010009	3	7.2	ug/m3 LC	30	Oakland	1	100.0000	88101	PM2.5 - Local Conditions	41860	San Francisco-Oakland-Hayward, CA	06	California	001	Alameda	37.743065	-122.169935
11/03/2014	AQS	060010009	3	7.2	ug/m3 LC	30	Oakland	1	100.0000	88101	PM2.5 - Local Conditions	41860	San Francisco-Oakland-Hayward, CA	06	California	001	Alameda	37.743065	-122.169935
11/04/2014	AQS	060010009	3	10.2	ug/m3 LC	43	Oakland	1	100.0000	88101	PM2.5 - Local Conditions	41860	San Francisco-Oakland-Hayward, CA	06	California	001	Alameda	37.743065	-122.169935
11/05/2014	AQS	060010009	3	12.7	ug/m3 LC	52	Oakland	1	100.0000	88101	PM2.5 - Local Conditions	41860	San Francisco-Oakland-Hayward, CA	06	California	001	Alameda	37.743065	-122.169935
11/06/2014	AQS	060010009	3	16.2	ug/m3 LC	60	Oakland	1	100.0000	88101	PM2.5 - Local Conditions	41860	San Francisco-Oakland-Hayward, CA	06	California	001	Alameda	37.743065	-122.169935
11/07/2014	AQS	060010009	3	13	ug/m3 LC	53	Oakland	1	100.0000	88101	PM2.5 - Local Conditions	41860	San Francisco-Oakland-Hayward, CA	06	California	001	Alameda	37.743065	-122.169935
11/08/2014	AQS	060010009	3	16.7	ug/m3 LC	61	Oakland	1	100.0000	88101	PM2.5 - Local Conditions	41860	San Francisco-Oakland-Hayward, CA	06	California	001	Alameda	37.743065	-122.169935
11/09/2014	AQS	060010009	3	13.9	ug/m3 LC	55	Oakland	1	100.0000	88101	PM2.5 - Local Conditions	41860	San Francisco-Oakland-Hayward, CA	06	California	001	Alameda	37.743065	-122.169935
11/10/2014	AQS	060010009	3	16	ug/m3 LC	59	Oakland	1	100.0000	88101	PM2.5 - Local Conditions	41860	San Francisco-Oakland-Hayward, CA	06	California	001	Alameda	37.743065	-122.169935
11/11/2014	AQS	060010009	3	6.1	ug/m3 LC	25	Oakland	1	100.0000	88101	PM2.5 - Local Conditions	41860	San Francisco-Oakland-Hayward, CA	06	California	001	Alameda	37.743065	-122.169935
11/12/2014	AQS	060010009	3	8.4	ug/m3 LC	35	Oakland	1	100.0000	88101	PM2.5 - Local Conditions	41860	San Francisco-Oakland-Hayward, CA	06	California	001	Alameda	37.743065	-122.169935
11/13/2014	AQS	060010009	3	3.1	ug/m3 LC	13	Oakland	1	100.0000	88101	PM2.5 - Local Conditions	41860	San Francisco-Oakland-Hayward, CA	06	California	001	Alameda	37.743065	-122.169935
11/14/2014	AQS	060010009	3	8.5	ug/m3 LC	35	Oakland	1	100.0000	88101	PM2.5 - Local Conditions	41860	San Francisco-Oakland-Hayward, CA	06	California	001	Alameda	37.743065	-122.169935
11/15/2014	AQS	060010009	3	9.7	ug/m3 LC	40	Oakland	1	100.0000	88101	PM2.5 - Local Conditions	41860	San Francisco-Oakland-Hayward, CA	06	California	001	Alameda	37.743065	-122.169935
11/16/2014	AQS	060010009	3	7.1	ug/m3 LC	30	Oakland	1	100.0000	88101	PM2.5 - Local Conditions	41860	San Francisco-Oakland-Hayward, CA	06	California	001	Alameda	37.743065	-122.169935
11/17/2014	AQS	060010009	3	9.1	ug/m3 LC	38	Oakland	1	100.0000	88101	PM2.5 - Local Conditions	41860	San Francisco-Oakland-Hayward, CA	06	California	001	Alameda	37.743065	-122.169935
11/18/2014	AQS	060010009	3	20.5	ug/m3 LC	69	Oakland	1	100.0000	88101	PM2.5 - Local Conditions	41860	San Francisco-Oakland-Hayward, CA	06	California	001	Alameda	37.743065	-122.169935
11/19/2014	AQS	060010009	3	11.5	ug/m3 LC	48	Oakland	1	100.0000	88101	PM2.5 - Local Conditions	41860	San Francisco-Oakland-Hayward, CA	06	California	001	Alameda	37.743065	-122.169935
11/20/2014	AQS	060010009	3	11.2	ug/m3 LC	47	Oakland	1	100.0000	88101	PM2.5 - Local Conditions	41860	San Francisco-Oakland-Hayward, CA	06	California	001	Alameda	37.743065	-122.169935
11/21/2014	AQS	060010009	3	15.8	ug/m3 LC	59	Oakland	1	100.0000	88101	PM2.5 - Local Conditions	41860	San Francisco-Oakland-Hayward, CA	06	California	001	Alameda	37.743065	-122.169935
11/22/2014	AQS	060010009	3	8.9	ug/m3 LC	37	Oakland	1	100.0000	88101	PM2.5 - Local Conditions	41860	San Francisco-Oakland-Hayward, CA	06	California	001	Alameda	37.743065	-122.169935
11/23/2014	AQS	060010009	3	9.5	ug/m3 LC	40	Oakland	1	100.0000	88101	PM2.5 - Local Conditions	41860	San Francisco-Oakland-Hayward, CA	06	California	001	Alameda	37.743065	-122.169935
11/24/2014	AQS	060010009	3	9.1	ug/m3 LC	38	Oakland	1	100.0000	88101	PM2.5 - Local Conditions	41860	San Francisco-Oakland-Hayward, CA	06	California	001	Alameda	37.743065	-122.169935
11/25/2014	AQS	060010009	3	14.5	ug/m3 LC	56	Oakland	1	100.0000	88101	PM2.5 - Local Conditions	41860	San Francisco-Oakland-Hayward, CA	06	California	001	Alameda	37.743065	-122.169935
11/26/2014	AQS	060010009	3	24.3	ug/m3 LC	77	Oakland	1	100.0000	88101	PM2.5 - Local Conditions	41860	San Francisco-Oakland-Hayward, CA	06	California	001	Alameda	37.743065	-122.169935
11/27/2014	AQS	060010009	3	32.5	ug/m3 LC	94	Oakland	1	100.0000	88101	PM2.5 - Local Conditions	41860	San Francisco-Oakland-Hayward, CA	06	California	001	Alameda	37.743065	-122.169935
11/28/2014	AQS	060010009	3	16.6	ug/m3 LC	60	Oakland	1	100.0000	88101	PM2.5 - Local Conditions	41860	San Francisco-Oakland-Hayward, CA	06	California	001	Alameda	37.743065	-122.169935
11/29/2014	AQS	060010009	3	7.1	ug/m3 LC	30	Oakland	1	100.0000	88101	PM2.5 - Local Conditions	41860	San Francisco-Oakland-Hayward, CA	06	California	001	Alameda	37.743065	-122.169935
11/30/2014	AQS	060010009	3	5.3	ug/m3 LC	22	Oakland	1	100.0000	88101	PM2.5 - Local Conditions	41860	San Francisco-Oakland-Hayward, CA	06	California	001	Alameda	37.743065	-122.169935
12/01/2014	AQS	060010009	3	6.7	ug/m3 LC	28	Oakland	1	100.0000	88101	PM2.5 - Local Conditions	41860	San Francisco-Oakland-Hayward, CA	06	California	001	Alameda	37.743065	-122.169935
12/02/2014	AQS	060010009	3	3.8	ug/m3 LC	16	Oakland	1	100.0000	88101	PM2.5 - Local Conditions	41860	San Francisco-Oakland-Hayward, CA	06	California	001	Alameda	37.743065	-122.169935
12/03/2014	AQS	060010009	3	3.7	ug/m3 LC	15	Oakland	1	100.0000	88101	PM2.5 - Local Conditions	41860	San Francisco-Oakland-Hayward, CA	06	California	001	Alameda	37.743065	-122.169935
12/04/2014	AQS	060010009	3	4.7	ug/m3 LC	20	Oakland	1	100.0000	88101	PM2.5 - Local Conditions	41860	San Francisco-Oakland-Hayward, CA	06	California	001	Alameda	37.743065	-122.169935
12/05/2014	AQS	060010009	3	4.3	ug/m3 LC	18	Oakland	1	100.0000	88101	PM2.5 - Local Conditions	41860	San Francisco-Oakland-Hayward, CA	06	California	001	Alameda	37.743065	-122.169935
12/06/2014	AQS	060010009	3	4.6	ug/m3 LC	19	Oakland	1	100.0000	88101	PM2.5 - Local Conditions	41860	San Francisco-Oakland-Hayward, CA	06	California	001	Alameda	37.743065	-122.169935
12/07/2014	AQS	060010009	3	10.7	ug/m3 LC	45	Oakland	1	100.0000	88101	PM2.5 - Local Conditions	41860	San Francisco-Oakland-Hayward, CA	06	California	001	Alameda	37.743065	-122.169935
12/08/2014	AQS	060010009	3	8.7	ug/m3 LC	36	Oakland	1	100.0000	88101	PM2.5 - Local Conditions	41860	San Francisco-Oakland-Hayward, CA	06	California	001	Alameda	37.743065	-122.169935
12/09/2014	AQS	060010009	3	13.6	ug/m3 LC	54	Oakland	1	100.0000	88101	PM2.5 - Local Conditions	41860	San Francisco-Oakland-Hayward, CA	06	California	001	Alameda	37.743065	-122.169935
12/10/2014	AQS	060010009	3	10.7	ug/m3 LC	45	Oakland	1	100.0000	88101	PM2.5 - Local Conditions	41860	San Francisco-Oakland-Hayward, CA	06	California	001	Alameda	37.743065	-122.169935
12/11/2014	AQS	060010009	3	4.3	ug/m3 LC	18	Oakland	1	100.0000	88101	PM2.5 - Local Conditions	41860	San Francisco-Oakland-Hayward, CA	06	California	001	Alameda	37.743065	-122.169935
12/12/2014	AQS	060010009	3	5.5	ug/m3 LC	23	Oakland	1	100.0000	88101	PM2.5 - Local Conditions	41860	San Francisco-Oakland-Hayward, CA	06	California	001	Alameda	37.743065	-122.169935
12/13/2014	AQS	060010009	3	7.5	ug/m3 LC	31	Oakland	1	100.0000	88101	PM2.5 - Local Conditions	41860	San Francisco-Oakland-Hayward, CA	06	California	001	Alameda	37.743065	-122.169935
12/14/2014	AQS	060010009	3	7.8	ug/m3 LC	33	Oakland	1	100.0000	88101	PM2.5 - Local Conditions	41860	San Francisco-Oakland-Hayward, CA	06	California	001	Alameda	37.743065	-122.169935
12/15/2014	AQS	060010009	3	5.1	ug/m3 LC	21	Oakland	1	100.0000	88101	PM2.5 - Local Conditions	41860	San Francisco-Oakland-Hayward, CA	06	California	001	Alameda	37.743065	-122.169935
12/16/2014	AQS	060010009	3	4.6	ug/m3 LC	19	Oakland	1	100.0000	88101	PM2.5 - Local Conditions	41860	San Francisco-Oakland-Hayward, CA	06	California	001	Alameda	37.743065	-122.169935
12/17/2014	AQS	060010009	3	7.2	ug/m3 LC	30	Oakland	1	100.0000	88101	PM2.5 - Local Conditions	41860	San Francisco-Oakland-Hayward, CA	06	California	001	Alameda	37.743065	-122.169935
12/20/2014	AQS	060010009	3	7.8	ug/m3 LC	33	Oakland	1	100.0000	88101	PM2.5 - Local Conditions	41860	San Francisco-Oakland-Hayward, CA	06	California	001	Alameda	37.743065	-122.169935
12/21/2014	AQS	060010009	3	5.9	ug/m3 LC	25	Oakland	1	100.0000	88101	PM2.5 - Local Conditions	41860	San Francisco-Oakland-Hayward, CA	06	California	001	Alameda	37.743065	-122.169935
12/22/2014	AQS	060010009	3	7.6	ug/m3 LC	32	Oakland	1	100.0000	88101	PM2.5 - Local Conditions	41860	San Francisco-Oakland-Hayward, CA	06	California	001	Alameda	37.743065	-122.169935
12/23/2014	AQS	060010009	3	6.2	ug/m3 LC	26	Oakland	1	100.0000	88101	PM2.5 - Local Conditions	41860	San Francisco-Oakland-Hayward, CA	06	California	001	Alameda	37.743065	-122.169935
12/24/2014	AQS	060010009	3	6.2	ug/m3 LC	26	Oakland	1	100.0000	88101	PM2.5 - Local Conditions	41860	San Francisco-Oakland-Hayward, CA	06	California	001	Alameda	37.743065	-122.169935
12/25/2014	AQS	060010009	3	4.9	ug/m3 LC	20	Oakland	1	100.0000	88101	PM2.5 - Local Conditions	41860	San Francisco-Oakland-Hayward, CA	06	California	001	Alameda	37.743065	-122.169935
12/26/2014	AQS	060010009	3	6.7	ug/m3 LC	28	Oakland	1	100.0000	88101	PM2.5 - Local Conditions	41860	San Francisco-Oakland-Hayward, CA	06	California	001	Alameda	37.743065	-122.169935
12/27/2014	AQS	060010009	3	9	ug/m3 LC	38	Oakland	1	100.0000	88101	PM2.5 - Local Conditions	41860	San Francisco-Oakland-Hayward, CA	06	California	001	Alameda	37.743065	-122.169935
12/28/2014	AQS	060010009	3	19.9	ug/m3 LC	67	Oakland	1	100.0000	88101	PM2.5 - Local Conditions	41860	San Francisco-Oakland-Hayward, CA	06	California	001	Alameda	37.743065	-122.169935
12/29/2014	AQS	060010009	3	9	ug/m3 LC	38	Oakland	1	100.0000	88101	PM2.5 - Local Conditions	41860	San Francisco-Oakland-Hayward, CA	06	California	001	Alameda	37.743065	-122.169935
12/30/2014	AQS	060010009	3	6	ug/m3 LC	25	Oakland	1	100.0000	88101	PM2.5 - Local Conditions	41860	San Francisco-Oakland-Hayward, CA	06	California	001	Alameda	37.743065	-122.169935
12/31/2014	AQS	060010009	3	9	ug/m3 LC	38	Oakland	1	100.0000	88101	PM2.5 - Local Conditions	41860	San Francisco-Oakland-Hayward, CA	06	California	001	Alameda	37.743065	-122.169935
01/01/2014	AQS	060010011	3	38.8	ug/m3 LC	109	Oakland West	1	100.0000	88101	PM2.5 - Local Conditions	41860	San Francisco-Oakland-Hayward, CA	06	California	001	Alameda	37.814781	-122.282347
01/02/2014	AQS	060010011	3	25.7	ug/m3 LC	80	Oakland West	1	100.0000	88101	PM2.5 - Local Conditions	41860	San Francisco-Oakland-Hayward, CA	06	California	001	Alameda	37.814781	-122.282347
01/03/2014	AQS	060010011	3	25.7	ug/m3 LC	80	Oakland West	1	100.0000	88101	PM2.5 - Local Conditions	41860	San Francisco-Oakland-Hayward, CA	06	California	001	Alameda	37.814781	-122.282347
01/04/2014	AQS	060010011	3	19.5	ug/m3 LC	67	Oakland West	1	100.0000	88101	PM2.5 - Local Conditions	41860	San Francisco-Oakland-Hayward, CA	06	California	001	Alameda	37.814781	-122.282347
01/05/2014	AQS	060010011	3	11.8	ug/m3 LC	49	Oakland West	1	100.0000	88101	PM2.5 - Local Conditions	41860	San Francisco-Oakland-Hayward, CA	06	California	001	Alameda	37.814781	-122.282347
01/06/2014	AQS	060010011	3	25.8	ug/m3 LC	80	Oakland West	1	100.0000	88101	PM2.5 - Local Conditions	41860	San Francisco-Oakland-Hayward, CA	06	California	001	Alameda	37.814781	-122.282347
01/07/2014	AQS	060010011	3	25.2	ug/m3 LC	79	Oakland West	1	100.0000	88101	PM2.5 - Local Conditions	41860	San Francisco-Oakland-Hayward, CA	06	California	001	Alameda	37.814781	-122.282347
01/08/2014	AQS	060010011	3	8.2	ug/m3 LC	34	Oakland West	1	100.0000	88101	PM2.5 - Local Conditions	41860	San Francisco-Oakland-Hayward, CA	06	California	001	Alameda	37.814781	-122.282347
01/09/2014	AQS	060010011	3	8.7	ug/m3 LC	36	Oakland West	1	100.0000	88101	PM2.5 - Local Conditions	41860	San Francisco-Oakland-Hayward, CA	06	California	001	Alameda	37.814781	-122.282347
01/10/2014	AQS	060010011	3	10.4	ug/m3 LC	43	Oakland West	1	100.0000	88101	PM2.5 - Local Conditions	41860	San Francisco-Oakland-Hayward, CA	06	California	001	Alameda	37.814781	-122.282347
01/11/2014	AQS	060010011	3	10.8	ug/m3 LC	45	Oakland West	1	100.0000	88101	PM2.5 - Local Conditions	41860	San Francisco-Oakland-Hayward, CA	06	California	001	Alameda	37.814781	-122.282347
01/12/2014	AQS	060010011	3	10	ug/m3 LC	42	Oakland West	1	100.0000	88101	PM2.5 - Local Conditions	41860	San Francisco-Oakland-Hayward, CA	06	California	001	Alameda	37.814781	-122.282347
01/13/2014	AQS	060010011	3	8.1	ug/m3 LC	34	Oakland West	1	100.0000	88101	PM2.5 - Local Conditions	41860	San Francisco-Oakland-Hayward, CA	06	California	001	Alameda	37.814781	-122.282347
01/14/2014	AQS	060010011	3	14.7	ug/m3 LC	56	Oakland West	1	100.0000	88101	PM2.5 - Local Conditions	41860	San Francisco-Oakland-Hayward, CA	06	California	001	Alameda	37.814781	-122.282347
01/15/2014	AQS	060010011	3	15	ug/m3 LC	57	Oakland West	1	100.0000	88101	PM2.5 - Local Conditions	41860	San Francisco-Oakland-Hayward, CA	06	California	001	Alameda	37.814781	-122.282347
01/16/2014	AQS	060010011	3	22.2	ug/m3 LC	72	Oakland West	1	100.0000	88101	PM2.5 - Local Conditions	41860	San Francisco-Oakland-Hayward, CA	06	California	001	Alameda	37.814781	-122.282347
01/17/2014	AQS	060010011	3	33.8	ug/m3 LC	97	Oakland West	1	100.0000	88101	PM2.5 - Local Conditions	41860	San Francisco-Oakland-Hayward, CA	06	California	001	Alameda	37.814781	-122.282347
01/18/2014	AQS	060010011	3	23.4	ug/m3 LC	75	Oakland West	1	100.0000	88101	PM2.5 - Local Conditions	41860	San Francisco-Oakland-Hayward, CA	06	California	001	Alameda	37.814781	-122.282347
01/19/2014	AQS	060010011	3	27.2	ug/m3 LC	83	Oakland West	1	100.0000	88101	PM2.5 - Local Conditions	41860	San Francisco-Oakland-Hayward, CA	06	California	001	Alameda	37.814781	-122.282347
01/20/2014	AQS	060010011	3	25.5	ug/m3 LC	79	Oakland West	1	100.0000	88101	PM2.5 - Local Conditions	41860	San Francisco-Oakland-Hayward, CA	06	California	001	Alameda	37.814781	-122.282347
01/21/2014	AQS	060010011	3	18.9	ug/m3 LC	65	Oakland West	1	100.0000	88101	PM2.5 - Local Conditions	41860	San Francisco-Oakland-Hayward, CA	06	California	001	Alameda	37.814781	-122.282347
01/22/2014	AQS	060010011	3	17.4	ug/m3 LC	62	Oakland West	1	100.0000	88101	PM2.5 - Local Conditions	41860	San Francisco-Oakland-Hayward, CA	06	California	001	Alameda	37.814781	-122.282347
01/23/2014	AQS	060010011	3	14.2	ug/m3 LC	55	Oakland West	1	100.0000	88101	PM2.5 - Local Conditions	41860	San Francisco-Oakland-Hayward, CA	06	California	001	Alameda	37.814781	-122.282347
01/24/2014	AQS	060010011	3	30.9	ug/m3 LC	91	Oakland West	1	100.0000	88101	PM2.5 - Local Conditions	41860	San Francisco-Oakland-Hayward, CA	06	California	001	Alameda	37.814781	-122.282347
01/25/2014	AQS	060010011	3	25.4	ug/m3 LC	79	Oakland West	1	100.0000	88101	PM2.5 - Local Conditions	41860	San Francisco-Oakland-Hayward, CA	06	California	001	Alameda	37.814781	-122.282347
01/26/2014	AQS	060010011	3	17.7	ug/m3 LC	63	Oakland West	1	100.0000	88101	PM2.5 - Local Conditions	41860	San Francisco-Oakland-Hayward, CA	06	California	001	Alameda	37.814781	-122.282347
01/27/2014	AQS	060010011	3	12.6	ug/m3 LC	52	Oakland West	1	100.0000	88101	PM2.5 - Local Conditions	41860	San Francisco-Oakland-Hayward, CA	06	California	001	Alameda	37.814781	-122.282347
01/28/2014	AQS	060010011	3	7.7	ug/m3 LC	32	Oakland West	1	100.0000	88101	PM2.5 - Local Conditions	41860	San Francisco-Oakland-Hayward, CA	06	California	001	Alameda	37.814781	-122.282347
01/29/2014	AQS	060010011	3	6	ug/m3 LC	25	Oakland West	1	100.0000	88101	PM2.5 - Local Conditions	41860	San Francisco-Oakland-Hayward, CA	06	California	001	Alameda	37.814781	-122.282347
01/30/2014	AQS	060010011	3	7	ug/m3 LC	29	Oakland West	1	100.0000	88101	PM2.5 - Local Conditions	41860	San Francisco-Oakland-Hayward, CA	06	California	001	Alameda	37.814781	-122.282347
01/31/2014	AQS	060010011	3	5.9	ug/m3 LC	25	Oakland West	1	100.0000	88101	PM2.5 - Local Conditions	41860	San Francisco-Oakland-Hayward, CA	06	California	001	Alameda	37.814781	-122.282347
02/01/2014	AQS	060010011	3	5.2	ug/m3 LC	22	Oakland West	1	100.0000	88101	PM2.5 - Local Conditions	41860	San Francisco-Oakland-Hayward, CA	06	California	001	Alameda	37.814781	-122.282347
02/02/2014	AQS	060010011	3	5.6	ug/m3 LC	23	Oakland West	1	100.0000	88101	PM2.5 - Local Conditions	41860	San Francisco-Oakland-Hayward, CA	06	California	001	Alameda	37.814781	-122.282347
02/03/2014	AQS	060010011	3	7	ug/m3 LC	29	Oakland West	1	100.0000	88101	PM2.5 - Local Conditions	41860	San Francisco-Oakland-Hayward, CA	06	California	001	Alameda	37.814781	-122.282347
02/04/2014	AQS	060010011	3	7.2	ug/m3 LC	30	Oakland West	1	100.0000	88101	PM2.5 - Local Conditions	41860	San Francisco-Oakland-Hayward, CA	06	California	001	Alameda	37.814781	-122.282347
02/05/2014	AQS	060010011	3	5.4	ug/m3 LC	23	Oakland West	1	100.0000	88101	PM2.5 - Local Conditions	41860	San Francisco-Oakland-Hayward, CA	06	California	001	Alameda	37.814781	-122.282347
02/06/2014	AQS	060010011	3	8.3	ug/m3 LC	35	Oakland West	1	100.0000	88101	PM2.5 - Local Conditions	41860	San Francisco-Oakland-Hayward, CA	06	California	001	Alameda	37.814781	-122.282347
02/07/2014	AQS	060010011	3	6.8	ug/m3 LC	28	Oakland West	1	100.0000	88101	PM2.5 - Local Conditions	41860	San Francisco-Oakland-Hayward, CA	06	California	001	Alameda	37.814781	-122.282347
02/08/2014	AQS	060010011	3	2.1	ug/m3 LC	9	Oakland West	1	100.0000	88101	PM2.5 - Local Conditions	41860	San Francisco-Oakland-Hayward, CA	06	California	001	Alameda	37.814781	-122.282347
02/09/2014	AQS	060010011	3	1.5	ug/m3 LC	6	Oakland West	1	100.0000	88101	PM2.5 - Local Conditions	41860	San Francisco-Oakland-Hayward, CA	06	California	001	Alameda	37.814781	-122.282347
02/10/2014	AQS	060010011	3	5.3	ug/m3 LC	22	Oakland West	1	100.0000	88101	PM2.5 - Local Conditions	41860	San Francisco-Oakland-Hayward, CA	06	California	001	Alameda	37.814781	-122.282347
02/11/2014	AQS	060010011	3	8.1	ug/m3 LC	34	Oakland West	1	100.0000	88101	PM2.5 - Local Conditions	41860	San Francisco-Oakland-Hayward, CA	06	California	001	Alameda	37.814781	-122.282347
02/12/2014	AQS	060010011	3	9.4	ug/m3 LC	39	Oakland West	1	100.0000	88101	PM2.5 - Local Conditions	41860	San Francisco-Oakland-Hayward, CA	06	California	001	Alameda	37.814781	-122.282347
02/13/2014	AQS	060010011	3	9.3	ug/m3 LC	39	Oakland West	1	100.0000	88101	PM2.5 - Local Conditions	41860	San Francisco-Oakland-Hayward, CA	06	California	001	Alameda	37.814781	-122.282347
02/14/2014	AQS	060010011	3	2.7	ug/m3 LC	11	Oakland West	1	100.0000	88101	PM2.5 - Local Conditions	41860	San Francisco-Oakland-Hayward, CA	06	California	001	Alameda	37.814781	-122.282347
02/15/2014	AQS	060010011	3	5.4	ug/m3 LC	23	Oakland West	1	100.0000	88101	PM2.5 - Local Conditions	41860	San Francisco-Oakland-Hayward, CA	06	California	001	Alameda	37.814781	-122.282347
02/16/2014	AQS	060010011	3	6.2	ug/m3 LC	26	Oakland West	1	100.0000	88101	PM2.5 - Local Conditions	41860	San Francisco-Oakland-Hayward, CA	06	California	001	Alameda	37.814781	-122.282347
02/17/2014	AQS	060010011	3	7.7	ug/m3 LC	32	Oakland West	1	100.0000	88101	PM2.5 - Local Conditions	41860	San Francisco-Oakland-Hayward, CA	06	California	001	Alameda	37.814781	-122.282347
02/18/2014	AQS	060010011	3	8.8	ug/m3 LC	37	Oakland West	1	100.0000	88101	PM2.5 - Local Conditions	41860	San Francisco-Oakland-Hayward, CA	06	California	001	Alameda	37.814781	-122.282347
02/19/2014	AQS	060010011	3	6.6	ug/m3 LC	28	Oakland West	1	100.0000	88101	PM2.5 - Local Conditions	41860	San Francisco-Oakland-Hayward, CA	06	California	001	Alameda	37.814781	-122.282347
02/20/2014	AQS	060010011	3	7.2	ug/m3 LC	30	Oakland West	1	100.0000	88101	PM2.5 - Local Conditions	41860	San Francisco-Oakland-Hayward, CA	06	California	001	Alameda	37.814781	-122.282347
02/21/2014	AQS	060010011	3	10.2	ug/m3 LC	43	Oakland West	1	100.0000	88101	PM2.5 - Local Conditions	41860	San Francisco-Oakland-Hayward, CA	06	California	001	Alameda	37.814781	-122.282347
02/22/2014	AQS	060010011	3	11.2	ug/m3 LC	47	Oakland West	1	100.0000	88101	PM2.5 - Local Conditions	41860	San Francisco-Oakland-Hayward, CA	06	California	001	Alameda	37.814781	-122.282347
02/23/2014	AQS	060010011	3	8.5	ug/m3 LC	35	Oakland West	1	100.0000	88101	PM2.5 - Local Conditions	41860	San Francisco-Oakland-Hayward, CA	06	California	001	Alameda	37.814781	-122.282347
02/24/2014	AQS	060010011	3	12.7	ug/m3 LC	52	Oakland West	1	100.0000	88101	PM2.5 - Local Conditions	41860	San Francisco-Oakland-Hayward, CA	06	California	001	Alameda	37.814781	-122.282347
02/25/2014	AQS	060010011	3	11.6	ug/m3 LC	48	Oakland West	1	100.0000	88101	PM2.5 - Local Conditions	41860	San Francisco-Oakland-Hayward, CA	06	California	001	Alameda	37.814781	-122.282347
02/26/2014	AQS	060010011	3	7.2	ug/m3 LC	30	Oakland West	1	100.0000	88101	PM2.5 - Local Conditions	41860	San Francisco-Oakland-Hayward, CA	06	California	001	Alameda	37.814781	-122.282347
02/27/2014	AQS	060010011	3	5.6	ug/m3 LC	23	Oakland West	1	100.0000	88101	PM2.5 - Local Conditions	41860	San Francisco-Oakland-Hayward, CA	06	California	001	Alameda	37.814781	-122.282347
02/28/2014	AQS	060010011	3	4.7	ug/m3 LC	20	Oakland West	1	100.0000	88101	PM2.5 - Local Conditions	41860	San Francisco-Oakland-Hayward, CA	06	California	001	Alameda	37.814781	-122.282347
03/01/2014	AQS	060010011	3	4.7	ug/m3 LC	20	Oakland West	1	100.0000	88101	PM2.5 - Local Conditions	41860	San Francisco-Oakland-Hayward, CA	06	California	001	Alameda	37.814781	-122.282347
03/02/2014	AQS	060010011	3	5.2	ug/m3 LC	22	Oakland West	1	100.0000	88101	PM2.5 - Local Conditions	41860	San Francisco-Oakland-Hayward, CA	06	California	001	Alameda	37.814781	-122.282347
03/03/2014	AQS	060010011	3	6	ug/m3 LC	25	Oakland West	1	100.0000	88101	PM2.5 - Local Conditions	41860	San Francisco-Oakland-Hayward, CA	06	California	001	Alameda	37.814781	-122.282347
03/04/2014	AQS	060010011	3	5.1	ug/m3 LC	21	Oakland West	1	100.0000	88101	PM2.5 - Local Conditions	41860	San Francisco-Oakland-Hayward, CA	06	California	001	Alameda	37.814781	-122.282347
03/05/2014	AQS	060010011	3	8.3	ug/m3 LC	35	Oakland West	1	100.0000	88101	PM2.5 - Local Conditions	41860	San Francisco-Oakland-Hayward, CA	06	California	001	Alameda	37.814781	-122.282347
03/06/2014	AQS	060010011	3	8.8	ug/m3 LC	37	Oakland West	1	100.0000	88101	PM2.5 - Local Conditions	41860	San Francisco-Oakland-Hayward, CA	06	California	001	Alameda	37.814781	-122.282347
03/07/2014	AQS	060010011	3	9.2	ug/m3 LC	38	Oakland West	1	100.0000	88101	PM2.5 - Local Conditions	41860	San Francisco-Oakland-Hayward, CA	06	California	001	Alameda	37.814781	-122.282347
03/08/2014	AQS	060010011	3	12	ug/m3 LC	50	Oakland West	1	100.0000	88101	PM2.5 - Local Conditions	41860	San Francisco-Oakland-Hayward, CA	06	California	001	Alameda	37.814781	-122.282347
03/09/2014	AQS	060010011	3	10.2	ug/m3 LC	43	Oakland West	1	100.0000	88101	PM2.5 - Local Conditions	41860	San Francisco-Oakland-Hayward, CA	06	California	001	Alameda	37.814781	-122.282347
03/10/2014	AQS	060010011	3	5	ug/m3 LC	21	Oakland West	1	100.0000	88101	PM2.5 - Local Conditions	41860	San Francisco-Oakland-Hayward, CA	06	California	001	Alameda	37.814781	-122.282347
03/11/2014	AQS	060010011	3	3.2	ug/m3 LC	13	Oakland West	1	100.0000	88101	PM2.5 - Local Conditions	41860	San Francisco-Oakland-Hayward, CA	06	California	001	Alameda	37.814781	-122.282347
03/12/2014	AQS	060010011	3	3.8	ug/m3 LC	16	Oakland West	1	100.0000	88101	PM2.5 - Local Conditions	41860	San Francisco-Oakland-Hayward, CA	06	California	001	Alameda	37.814781	-122.282347
03/13/2014	AQS	060010011	3	8.5	ug/m3 LC	35	Oakland West	1	100.0000	88101	PM2.5 - Local Conditions	41860	San Francisco-Oakland-Hayward, CA	06	California	001	Alameda	37.814781	-122.282347
03/14/2014	AQS	060010011	3	11.8	ug/m3 LC	49	Oakland West	1	100.0000	88101	PM2.5 - Local Conditions	41860	San Francisco-Oakland-Hayward, CA	06	California	001	Alameda	37.814781	-122.282347
03/15/2014	AQS	060010011	3	10.3	ug/m3 LC	43	Oakland West	1	100.0000	88101	PM2.5 - Local Conditions	41860	San Francisco-Oakland-Hayward, CA	06	California	001	Alameda	37.814781	-122.282347
03/16/2014	AQS	060010011	3	9.7	ug/m3 LC	40	Oakland West	1	100.0000	88101	PM2.5 - Local Conditions	41860	San Francisco-Oakland-Hayward, CA	06	California	001	Alameda	37.814781	-122.282347
03/17/2014	AQS	060010011	3	7.5	ug/m3 LC	31	Oakland West	1	100.0000	88101	PM2.5 - Local Conditions	41860	San Francisco-Oakland-Hayward, CA	06	California	001	Alameda	37.814781	-122.282347
03/18/2014	AQS	060010011	3	8.5	ug/m3 LC	35	Oakland West	1	100.0000	88101	PM2.5 - Local Conditions	41860	San Francisco-Oakland-Hayward, CA	06	California	001	Alameda	37.814781	-122.282347
03/19/2014	AQS	060010011	3	10.9	ug/m3 LC	45	Oakland West	1	100.0000	88101	PM2.5 - Local Conditions	41860	San Francisco-Oakland-Hayward, CA	06	California	001	Alameda	37.814781	-122.282347
03/20/2014	AQS	060010011	3	13.7	ug/m3 LC	54	Oakland West	1	100.0000	88101	PM2.5 - Local Conditions	41860	San Francisco-Oakland-Hayward, CA	06	California	001	Alameda	37.814781	-122.282347
03/21/2014	AQS	060010011	3	15.2	ug/m3 LC	58	Oakland West	1	100.0000	88101	PM2.5 - Local Conditions	41860	San Francisco-Oakland-Hayward, CA	06	California	001	Alameda	37.814781	-122.282347
03/22/2014	AQS	060010011	3	15.3	ug/m3 LC	58	Oakland West	1	100.0000	88101	PM2.5 - Local Conditions	41860	San Francisco-Oakland-Hayward, CA	06	California	001	Alameda	37.814781	-122.282347
03/23/2014	AQS	060010011	3	12.4	ug/m3 LC	52	Oakland West	1	100.0000	88101	PM2.5 - Local Conditions	41860	San Francisco-Oakland-Hayward, CA	06	California	001	Alameda	37.814781	-122.282347
03/24/2014	AQS	060010011	3	12.2	ug/m3 LC	51	Oakland West	1	100.0000	88101	PM2.5 - Local Conditions	41860	San Francisco-Oakland-Hayward, CA	06	California	001	Alameda	37.814781	-122.282347
03/25/2014	AQS	060010011	3	7.9	ug/m3 LC	33	Oakland West	1	100.0000	88101	PM2.5 - Local Conditions	41860	San Francisco-Oakland-Hayward, CA	06	California	001	Alameda	37.814781	-122.282347
03/26/2014	AQS	060010011	3	7.1	ug/m3 LC	30	Oakland West	1	100.0000	88101	PM2.5 - Local Conditions	41860	San Francisco-Oakland-Hayward, CA	06	California	001	Alameda	37.814781	-122.282347
03/27/2014	AQS	060010011	3	6.9	ug/m3 LC	29	Oakland West	1	100.0000	88101	PM2.5 - Local Conditions	41860	San Francisco-Oakland-Hayward, CA	06	California	001	Alameda	37.814781	-122.282347
03/28/2014	AQS	060010011	3	2.8	ug/m3 LC	12	Oakland West	1	100.0000	88101	PM2.5 - Local Conditions	41860	San Francisco-Oakland-Hayward, CA	06	California	001	Alameda	37.814781	-122.282347
03/29/2014	AQS	060010011	3	1.6	ug/m3 LC	7	Oakland West	1	100.0000	88101	PM2.5 - Local Conditions	41860	San Francisco-Oakland-Hayward, CA	06	California	001	Alameda	37.814781	-122.282347
03/30/2014	AQS	060010011	3	3.6	ug/m3 LC	15	Oakland West	1	100.0000	88101	PM2.5 - Local Conditions	41860	San Francisco-Oakland-Hayward, CA	06	California	001	Alameda	37.814781	-122.282347
04/02/2014	AQS	060010011	3	2.6	ug/m3 LC	11	Oakland West	1	100.0000	88101	PM2.5 - Local Conditions	41860	San Francisco-Oakland-Hayward, CA	06	California	001	Alameda	37.814781	-122.282347
04/03/2014	AQS	060010011	3	6.2	ug/m3 LC	26	Oakland West	1	100.0000	88101	PM2.5 - Local Conditions	41860	San Francisco-Oakland-Hayward, CA	06	California	001	Alameda	37.814781	-122.282347
04/04/2014	AQS	060010011	3	2	ug/m3 LC	8	Oakland West	1	100.0000	88101	PM2.5 - Local Conditions	41860	San Francisco-Oakland-Hayward, CA	06	California	001	Alameda	37.814781	-122.282347
04/05/2014	AQS	060010011	3	5.5	ug/m3 LC	23	Oakland West	1	100.0000	88101	PM2.5 - Local Conditions	41860	San Francisco-Oakland-Hayward, CA	06	California	001	Alameda	37.814781	-122.282347
04/06/2014	AQS	060010011	3	8.6	ug/m3 LC	36	Oakland West	1	100.0000	88101	PM2.5 - Local Conditions	41860	San Francisco-Oakland-Hayward, CA	06	California	001	Alameda	37.814781	-122.282347
04/08/2014	AQS	060010011	3	7.7	ug/m3 LC	32	Oakland West	1	100.0000	88101	PM2.5 - Local Conditions	41860	San Francisco-Oakland-Hayward, CA	06	California	001	Alameda	37.814781	-122.282347
04/10/2014	AQS	060010011	3	9.9	ug/m3 LC	41	Oakland West	1	100.0000	88101	PM2.5 - Local Conditions	41860	San Francisco-Oakland-Hayward, CA	06	California	001	Alameda	37.814781	-122.282347
04/11/2014	AQS	060010011	3	13.1	ug/m3 LC	53	Oakland West	1	100.0000	88101	PM2.5 - Local Conditions	41860	San Francisco-Oakland-Hayward, CA	06	California	001	Alameda	37.814781	-122.282347
04/12/2014	AQS	060010011	3	13.1	ug/m3 LC	53	Oakland West	1	100.0000	88101	PM2.5 - Local Conditions	41860	San Francisco-Oakland-Hayward, CA	06	California	001	Alameda	37.814781	-122.282347
04/13/2014	AQS	060010011	3	15.4	ug/m3 LC	58	Oakland West	1	100.0000	88101	PM2.5 - Local Conditions	41860	San Francisco-Oakland-Hayward, CA	06	California	001	Alameda	37.814781	-122.282347
04/14/2014	AQS	060010011	3	13.4	ug/m3 LC	54	Oakland West	1	100.0000	88101	PM2.5 - Local Conditions	41860	San Francisco-Oakland-Hayward, CA	06	California	001	Alameda	37.814781	-122.282347
04/15/2014	AQS	060010011	3	14.6	ug/m3 LC	56	Oakland West	1	100.0000	88101	PM2.5 - Local Conditions	41860	San Francisco-Oakland-Hayward, CA	06	California	001	Alameda	37.814781	-122.282347
04/16/2014	AQS	060010011	3	17.7	ug/m3 LC	63	Oakland West	1	100.0000	88101	PM2.5 - Local Conditions	41860	San Francisco-Oakland-Hayward, CA	06	California	001	Alameda	37.814781	-122.282347
04/17/2014	AQS	060010011	3	13.8	ug/m3 LC	55	Oakland West	1	100.0000	88101	PM2.5 - Local Conditions	41860	San Francisco-Oakland-Hayward, CA	06	California	001	Alameda	37.814781	-122.282347
04/18/2014	AQS	060010011	3	11.5	ug/m3 LC	48	Oakland West	1	100.0000	88101	PM2.5 - Local Conditions	41860	San Francisco-Oakland-Hayward, CA	06	California	001	Alameda	37.814781	-122.282347
04/19/2014	AQS	060010011	3	7.4	ug/m3 LC	31	Oakland West	1	100.0000	88101	PM2.5 - Local Conditions	41860	San Francisco-Oakland-Hayward, CA	06	California	001	Alameda	37.814781	-122.282347
04/20/2014	AQS	060010011	3	12.1	ug/m3 LC	51	Oakland West	1	100.0000	88101	PM2.5 - Local Conditions	41860	San Francisco-Oakland-Hayward, CA	06	California	001	Alameda	37.814781	-122.282347
04/21/2014	AQS	060010011	3	16.7	ug/m3 LC	61	Oakland West	1	100.0000	88101	PM2.5 - Local Conditions	41860	San Francisco-Oakland-Hayward, CA	06	California	001	Alameda	37.814781	-122.282347
04/22/2014	AQS	060010011	3	5.4	ug/m3 LC	23	Oakland West	1	100.0000	88101	PM2.5 - Local Conditions	41860	San Francisco-Oakland-Hayward, CA	06	California	001	Alameda	37.814781	-122.282347
04/23/2014	AQS	060010011	3	5.7	ug/m3 LC	24	Oakland West	1	100.0000	88101	PM2.5 - Local Conditions	41860	San Francisco-Oakland-Hayward, CA	06	California	001	Alameda	37.814781	-122.282347
04/24/2014	AQS	060010011	3	8.2	ug/m3 LC	34	Oakland West	1	100.0000	88101	PM2.5 - Local Conditions	41860	San Francisco-Oakland-Hayward, CA	06	California	001	Alameda	37.814781	-122.282347
04/25/2014	AQS	060010011	3	5	ug/m3 LC	21	Oakland West	1	100.0000	88101	PM2.5 - Local Conditions	41860	San Francisco-Oakland-Hayward, CA	06	California	001	Alameda	37.814781	-122.282347
04/26/2014	AQS	060010011	3	4.7	ug/m3 LC	20	Oakland West	1	100.0000	88101	PM2.5 - Local Conditions	41860	San Francisco-Oakland-Hayward, CA	06	California	001	Alameda	37.814781	-122.282347
04/27/2014	AQS	060010011	3	7	ug/m3 LC	29	Oakland West	1	100.0000	88101	PM2.5 - Local Conditions	41860	San Francisco-Oakland-Hayward, CA	06	California	001	Alameda	37.814781	-122.282347
04/28/2014	AQS	060010011	3	10.9	ug/m3 LC	45	Oakland West	1	100.0000	88101	PM2.5 - Local Conditions	41860	San Francisco-Oakland-Hayward, CA	06	California	001	Alameda	37.814781	-122.282347
04/29/2014	AQS	060010011	3	10.9	ug/m3 LC	45	Oakland West	1	100.0000	88101	PM2.5 - Local Conditions	41860	San Francisco-Oakland-Hayward, CA	06	California	001	Alameda	37.814781	-122.282347
04/30/2014	AQS	060010011	3	13.5	ug/m3 LC	54	Oakland West	1	100.0000	88101	PM2.5 - Local Conditions	41860	San Francisco-Oakland-Hayward, CA	06	California	001	Alameda	37.814781	-122.282347
05/01/2014	AQS	060010011	3	14.1	ug/m3 LC	55	Oakland West	1	100.0000	88101	PM2.5 - Local Conditions	41860	San Francisco-Oakland-Hayward, CA	06	California	001	Alameda	37.814781	-122.282347
05/02/2014	AQS	060010011	3	8.7	ug/m3 LC	36	Oakland West	1	100.0000	88101	PM2.5 - Local Conditions	41860	San Francisco-Oakland-Hayward, CA	06	California	001	Alameda	37.814781	-122.282347
05/03/2014	AQS	060010011	3	6.1	ug/m3 LC	25	Oakland West	1	100.0000	88101	PM2.5 - Local Conditions	41860	San Francisco-Oakland-Hayward, CA	06	California	001	Alameda	37.814781	-122.282347
05/04/2014	AQS	060010011	3	5.5	ug/m3 LC	23	Oakland West	1	100.0000	88101	PM2.5 - Local Conditions	41860	San Francisco-Oakland-Hayward, CA	06	California	001	Alameda	37.814781	-122.282347
05/05/2014	AQS	060010011	3	7.2	ug/m3 LC	30	Oakland West	1	100.0000	88101	PM2.5 - Local Conditions	41860	San Francisco-Oakland-Hayward, CA	06	California	001	Alameda	37.814781	-122.282347
05/06/2014	AQS	060010011	3	8.5	ug/m3 LC	35	Oakland West	1	100.0000	88101	PM2.5 - Local Conditions	41860	San Francisco-Oakland-Hayward, CA	06	California	001	Alameda	37.814781	-122.282347
05/07/2014	AQS	060010011	3	13	ug/m3 LC	53	Oakland West	1	100.0000	88101	PM2.5 - Local Conditions	41860	San Francisco-Oakland-Hayward, CA	06	California	001	Alameda	37.814781	-122.282347
05/08/2014	AQS	060010011	3	7.9	ug/m3 LC	33	Oakland West	1	100.0000	88101	PM2.5 - Local Conditions	41860	San Francisco-Oakland-Hayward, CA	06	California	001	Alameda	37.814781	-122.282347
05/09/2014	AQS	060010011	3	5.9	ug/m3 LC	25	Oakland West	1	100.0000	88101	PM2.5 - Local Conditions	41860	San Francisco-Oakland-Hayward, CA	06	California	001	Alameda	37.814781	-122.282347
05/10/2014	AQS	060010011	3	5.8	ug/m3 LC	24	Oakland West	1	100.0000	88101	PM2.5 - Local Conditions	41860	San Francisco-Oakland-Hayward, CA	06	California	001	Alameda	37.814781	-122.282347
05/11/2014	AQS	060010011	3	5.5	ug/m3 LC	23	Oakland West	1	100.0000	88101	PM2.5 - Local Conditions	41860	San Francisco-Oakland-Hayward, CA	06	California	001	Alameda	37.814781	-122.282347
05/12/2014	AQS	060010011	3	10.6	ug/m3 LC	44	Oakland West	1	100.0000	88101	PM2.5 - Local Conditions	41860	San Francisco-Oakland-Hayward, CA	06	California	001	Alameda	37.814781	-122.282347
05/13/2014	AQS	060010011	3	12.8	ug/m3 LC	52	Oakland West	1	100.0000	88101	PM2.5 - Local Conditions	41860	San Francisco-Oakland-Hayward, CA	06	California	001	Alameda	37.814781	-122.282347
05/14/2014	AQS	060010011	3	12	ug/m3 LC	50	Oakland West	1	100.0000	88101	PM2.5 - Local Conditions	41860	San Francisco-Oakland-Hayward, CA	06	California	001	Alameda	37.814781	-122.282347
05/15/2014	AQS	060010011	3	13.2	ug/m3 LC	53	Oakland West	1	100.0000	88101	PM2.5 - Local Conditions	41860	San Francisco-Oakland-Hayward, CA	06	California	001	Alameda	37.814781	-122.282347
05/16/2014	AQS	060010011	3	12.8	ug/m3 LC	52	Oakland West	1	100.0000	88101	PM2.5 - Local Conditions	41860	San Francisco-Oakland-Hayward, CA	06	California	001	Alameda	37.814781	-122.282347
05/17/2014	AQS	060010011	3	10.4	ug/m3 LC	43	Oakland West	1	100.0000	88101	PM2.5 - Local Conditions	41860	San Francisco-Oakland-Hayward, CA	06	California	001	Alameda	37.814781	-122.282347
05/18/2014	AQS	060010011	3	7.5	ug/m3 LC	31	Oakland West	1	100.0000	88101	PM2.5 - Local Conditions	41860	San Francisco-Oakland-Hayward, CA	06	California	001	Alameda	37.814781	-122.282347
05/19/2014	AQS	060010011	3	5.3	ug/m3 LC	22	Oakland West	1	100.0000	88101	PM2.5 - Local Conditions	41860	San Francisco-Oakland-Hayward, CA	06	California	001	Alameda	37.814781	-122.282347
05/20/2014	AQS	060010011	3	7	ug/m3 LC	29	Oakland West	1	100.0000	88101	PM2.5 - Local Conditions	41860	San Francisco-Oakland-Hayward, CA	06	California	001	Alameda	37.814781	-122.282347
05/21/2014	AQS	060010011	3	13.1	ug/m3 LC	53	Oakland West	1	100.0000	88101	PM2.5 - Local Conditions	41860	San Francisco-Oakland-Hayward, CA	06	California	001	Alameda	37.814781	-122.282347
05/22/2014	AQS	060010011	3	8.4	ug/m3 LC	35	Oakland West	1	100.0000	88101	PM2.5 - Local Conditions	41860	San Francisco-Oakland-Hayward, CA	06	California	001	Alameda	37.814781	-122.282347
05/23/2014	AQS	060010011	3	6.6	ug/m3 LC	28	Oakland West	1	100.0000	88101	PM2.5 - Local Conditions	41860	San Francisco-Oakland-Hayward, CA	06	California	001	Alameda	37.814781	-122.282347
05/24/2014	AQS	060010011	3	10.9	ug/m3 LC	45	Oakland West	1	100.0000	88101	PM2.5 - Local Conditions	41860	San Francisco-Oakland-Hayward, CA	06	California	001	Alameda	37.814781	-122.282347
05/25/2014	AQS	060010011	3	15	ug/m3 LC	57	Oakland West	1	100.0000	88101	PM2.5 - Local Conditions	41860	San Francisco-Oakland-Hayward, CA	06	California	001	Alameda	37.814781	-122.282347
05/26/2014	AQS	060010011	3	11.1	ug/m3 LC	46	Oakland West	1	100.0000	88101	PM2.5 - Local Conditions	41860	San Francisco-Oakland-Hayward, CA	06	California	001	Alameda	37.814781	-122.282347
05/27/2014	AQS	060010011	3	15	ug/m3 LC	57	Oakland West	1	100.0000	88101	PM2.5 - Local Conditions	41860	San Francisco-Oakland-Hayward, CA	06	California	001	Alameda	37.814781	-122.282347
05/28/2014	AQS	060010011	3	9.4	ug/m3 LC	39	Oakland West	1	100.0000	88101	PM2.5 - Local Conditions	41860	San Francisco-Oakland-Hayward, CA	06	California	001	Alameda	37.814781	-122.282347
05/29/2014	AQS	060010011	3	15.5	ug/m3 LC	58	Oakland West	1	100.0000	88101	PM2.5 - Local Conditions	41860	San Francisco-Oakland-Hayward, CA	06	California	001	Alameda	37.814781	-122.282347
05/30/2014	AQS	060010011	3	17.4	ug/m3 LC	62	Oakland West	1	100.0000	88101	PM2.5 - Local Conditions	41860	San Francisco-Oakland-Hayward, CA	06	California	001	Alameda	37.814781	-122.282347
05/31/2014	AQS	060010011	3	11.3	ug/m3 LC	47	Oakland West	1	100.0000	88101	PM2.5 - Local Conditions	41860	San Francisco-Oakland-Hayward, CA	06	California	001	Alameda	37.814781	-122.282347
06/01/2014	AQS	060010011	3	12.4	ug/m3 LC	52	Oakland West	1	100.0000	88101	PM2.5 - Local Conditions	41860	San Francisco-Oakland-Hayward, CA	06	California	001	Alameda	37.814781	-122.282347
06/02/2014	AQS	060010011	3	5.5	ug/m3 LC	23	Oakland West	1	100.0000	88101	PM2.5 - Local Conditions	41860	San Francisco-Oakland-Hayward, CA	06	California	001	Alameda	37.814781	-122.282347
06/03/2014	AQS	060010011	3	8.6	ug/m3 LC	36	Oakland West	1	100.0000	88101	PM2.5 - Local Conditions	41860	San Francisco-Oakland-Hayward, CA	06	California	001	Alameda	37.814781	-122.282347
06/04/2014	AQS	060010011	3	15	ug/m3 LC	57	Oakland West	1	100.0000	88101	PM2.5 - Local Conditions	41860	San Francisco-Oakland-Hayward, CA	06	California	001	Alameda	37.814781	-122.282347
06/05/2014	AQS	060010011	3	16.2	ug/m3 LC	60	Oakland West	1	100.0000	88101	PM2.5 - Local Conditions	41860	San Francisco-Oakland-Hayward, CA	06	California	001	Alameda	37.814781	-122.282347
06/06/2014	AQS	060010011	3	11.9	ug/m3 LC	50	Oakland West	1	100.0000	88101	PM2.5 - Local Conditions	41860	San Francisco-Oakland-Hayward, CA	06	California	001	Alameda	37.814781	-122.282347
06/07/2014	AQS	060010011	3	18.5	ug/m3 LC	64	Oakland West	1	100.0000	88101	PM2.5 - Local Conditions	41860	San Francisco-Oakland-Hayward, CA	06	California	001	Alameda	37.814781	-122.282347
06/08/2014	AQS	060010011	3	15	ug/m3 LC	57	Oakland West	1	100.0000	88101	PM2.5 - Local Conditions	41860	San Francisco-Oakland-Hayward, CA	06	California	001	Alameda	37.814781	-122.282347
06/09/2014	AQS	060010011	3	17.1	ug/m3 LC	62	Oakland West	1	100.0000	88101	PM2.5 - Local Conditions	41860	San Francisco-Oakland-Hayward, CA	06	California	001	Alameda	37.814781	-122.282347
06/10/2014	AQS	060010011	3	6.4	ug/m3 LC	27	Oakland West	1	100.0000	88101	PM2.5 - Local Conditions	41860	San Francisco-Oakland-Hayward, CA	06	California	001	Alameda	37.814781	-122.282347
06/11/2014	AQS	060010011	3	10.6	ug/m3 LC	44	Oakland West	1	100.0000	88101	PM2.5 - Local Conditions	41860	San Francisco-Oakland-Hayward, CA	06	California	001	Alameda	37.814781	-122.282347
06/12/2014	AQS	060010011	3	6	ug/m3 LC	25	Oakland West	1	100.0000	88101	PM2.5 - Local Conditions	41860	San Francisco-Oakland-Hayward, CA	06	California	001	Alameda	37.814781	-122.282347
06/13/2014	AQS	060010011	3	11.3	ug/m3 LC	47	Oakland West	1	100.0000	88101	PM2.5 - Local Conditions	41860	San Francisco-Oakland-Hayward, CA	06	California	001	Alameda	37.814781	-122.282347
06/14/2014	AQS	060010011	3	15.4	ug/m3 LC	58	Oakland West	1	100.0000	88101	PM2.5 - Local Conditions	41860	San Francisco-Oakland-Hayward, CA	06	California	001	Alameda	37.814781	-122.282347
06/15/2014	AQS	060010011	3	14.3	ug/m3 LC	56	Oakland West	1	100.0000	88101	PM2.5 - Local Conditions	41860	San Francisco-Oakland-Hayward, CA	06	California	001	Alameda	37.814781	-122.282347
06/16/2014	AQS	060010011	3	11.7	ug/m3 LC	49	Oakland West	1	100.0000	88101	PM2.5 - Local Conditions	41860	San Francisco-Oakland-Hayward, CA	06	California	001	Alameda	37.814781	-122.282347
06/17/2014	AQS	060010011	3	10.4	ug/m3 LC	43	Oakland West	1	100.0000	88101	PM2.5 - Local Conditions	41860	San Francisco-Oakland-Hayward, CA	06	California	001	Alameda	37.814781	-122.282347
06/18/2014	AQS	060010011	3	13.8	ug/m3 LC	55	Oakland West	1	100.0000	88101	PM2.5 - Local Conditions	41860	San Francisco-Oakland-Hayward, CA	06	California	001	Alameda	37.814781	-122.282347
06/19/2014	AQS	060010011	3	10.3	ug/m3 LC	43	Oakland West	1	100.0000	88101	PM2.5 - Local Conditions	41860	San Francisco-Oakland-Hayward, CA	06	California	001	Alameda	37.814781	-122.282347
06/20/2014	AQS	060010011	3	9.8	ug/m3 LC	41	Oakland West	1	100.0000	88101	PM2.5 - Local Conditions	41860	San Francisco-Oakland-Hayward, CA	06	California	001	Alameda	37.814781	-122.282347
06/21/2014	AQS	060010011	3	14.2	ug/m3 LC	55	Oakland West	1	100.0000	88101	PM2.5 - Local Conditions	41860	San Francisco-Oakland-Hayward, CA	06	California	001	Alameda	37.814781	-122.282347
06/22/2014	AQS	060010011	3	12.7	ug/m3 LC	52	Oakland West	1	100.0000	88101	PM2.5 - Local Conditions	41860	San Francisco-Oakland-Hayward, CA	06	California	001	Alameda	37.814781	-122.282347
06/23/2014	AQS	060010011	3	12.8	ug/m3 LC	52	Oakland West	1	100.0000	88101	PM2.5 - Local Conditions	41860	San Francisco-Oakland-Hayward, CA	06	California	001	Alameda	37.814781	-122.282347
06/24/2014	AQS	060010011	3	9.7	ug/m3 LC	40	Oakland West	1	100.0000	88101	PM2.5 - Local Conditions	41860	San Francisco-Oakland-Hayward, CA	06	California	001	Alameda	37.814781	-122.282347
06/25/2014	AQS	060010011	3	2.6	ug/m3 LC	11	Oakland West	1	100.0000	88101	PM2.5 - Local Conditions	41860	San Francisco-Oakland-Hayward, CA	06	California	001	Alameda	37.814781	-122.282347
06/26/2014	AQS	060010011	3	3.5	ug/m3 LC	15	Oakland West	1	100.0000	88101	PM2.5 - Local Conditions	41860	San Francisco-Oakland-Hayward, CA	06	California	001	Alameda	37.814781	-122.282347
06/27/2014	AQS	060010011	3	2.7	ug/m3 LC	11	Oakland West	1	100.0000	88101	PM2.5 - Local Conditions	41860	San Francisco-Oakland-Hayward, CA	06	California	001	Alameda	37.814781	-122.282347
06/28/2014	AQS	060010011	3	7	ug/m3 LC	29	Oakland West	1	100.0000	88101	PM2.5 - Local Conditions	41860	San Francisco-Oakland-Hayward, CA	06	California	001	Alameda	37.814781	-122.282347
06/29/2014	AQS	060010011	3	11.2	ug/m3 LC	47	Oakland West	1	100.0000	88101	PM2.5 - Local Conditions	41860	San Francisco-Oakland-Hayward, CA	06	California	001	Alameda	37.814781	-122.282347
06/30/2014	AQS	060010011	3	18.9	ug/m3 LC	65	Oakland West	1	100.0000	88101	PM2.5 - Local Conditions	41860	San Francisco-Oakland-Hayward, CA	06	California	001	Alameda	37.814781	-122.282347
07/01/2014	AQS	060010011	3	6.1	ug/m3 LC	25	Oakland West	1	100.0000	88101	PM2.5 - Local Conditions	41860	San Francisco-Oakland-Hayward, CA	06	California	001	Alameda	37.814781	-122.282347
07/02/2014	AQS	060010011	3	7.8	ug/m3 LC	33	Oakland West	1	100.0000	88101	PM2.5 - Local Conditions	41860	San Francisco-Oakland-Hayward, CA	06	California	001	Alameda	37.814781	-122.282347
07/03/2014	AQS	060010011	3	11.5	ug/m3 LC	48	Oakland West	1	100.0000	88101	PM2.5 - Local Conditions	41860	San Francisco-Oakland-Hayward, CA	06	California	001	Alameda	37.814781	-122.282347
07/04/2014	AQS	060010011	3	11.8	ug/m3 LC	49	Oakland West	1	100.0000	88101	PM2.5 - Local Conditions	41860	San Francisco-Oakland-Hayward, CA	06	California	001	Alameda	37.814781	-122.282347
07/05/2014	AQS	060010011	3	9.1	ug/m3 LC	38	Oakland West	1	100.0000	88101	PM2.5 - Local Conditions	41860	San Francisco-Oakland-Hayward, CA	06	California	001	Alameda	37.814781	-122.282347
07/06/2014	AQS	060010011	3	6.6	ug/m3 LC	28	Oakland West	1	100.0000	88101	PM2.5 - Local Conditions	41860	San Francisco-Oakland-Hayward, CA	06	California	001	Alameda	37.814781	-122.282347
07/07/2014	AQS	060010011	3	6.2	ug/m3 LC	26	Oakland West	1	100.0000	88101	PM2.5 - Local Conditions	41860	San Francisco-Oakland-Hayward, CA	06	California	001	Alameda	37.814781	-122.282347
07/08/2014	AQS	060010011	3	4.4	ug/m3 LC	18	Oakland West	1	100.0000	88101	PM2.5 - Local Conditions	41860	San Francisco-Oakland-Hayward, CA	06	California	001	Alameda	37.814781	-122.282347
07/09/2014	AQS	060010011	3	6.1	ug/m3 LC	25	Oakland West	1	100.0000	88101	PM2.5 - Local Conditions	41860	San Francisco-Oakland-Hayward, CA	06	California	001	Alameda	37.814781	-122.282347
07/10/2014	AQS	060010011	3	4	ug/m3 LC	17	Oakland West	1	100.0000	88101	PM2.5 - Local Conditions	41860	San Francisco-Oakland-Hayward, CA	06	California	001	Alameda	37.814781	-122.282347
07/11/2014	AQS	060010011	3	3.2	ug/m3 LC	13	Oakland West	1	100.0000	88101	PM2.5 - Local Conditions	41860	San Francisco-Oakland-Hayward, CA	06	California	001	Alameda	37.814781	-122.282347
07/12/2014	AQS	060010011	3	3.6	ug/m3 LC	15	Oakland West	1	100.0000	88101	PM2.5 - Local Conditions	41860	San Francisco-Oakland-Hayward, CA	06	California	001	Alameda	37.814781	-122.282347
07/13/2014	AQS	060010011	3	7.7	ug/m3 LC	32	Oakland West	1	100.0000	88101	PM2.5 - Local Conditions	41860	San Francisco-Oakland-Hayward, CA	06	California	001	Alameda	37.814781	-122.282347
07/14/2014	AQS	060010011	3	15.2	ug/m3 LC	58	Oakland West	1	100.0000	88101	PM2.5 - Local Conditions	41860	San Francisco-Oakland-Hayward, CA	06	California	001	Alameda	37.814781	-122.282347
07/15/2014	AQS	060010011	3	8.2	ug/m3 LC	34	Oakland West	1	100.0000	88101	PM2.5 - Local Conditions	41860	San Francisco-Oakland-Hayward, CA	06	California	001	Alameda	37.814781	-122.282347
07/16/2014	AQS	060010011	3	5.1	ug/m3 LC	21	Oakland West	1	100.0000	88101	PM2.5 - Local Conditions	41860	San Francisco-Oakland-Hayward, CA	06	California	001	Alameda	37.814781	-122.282347
07/17/2014	AQS	060010011	3	4.3	ug/m3 LC	18	Oakland West	1	100.0000	88101	PM2.5 - Local Conditions	41860	San Francisco-Oakland-Hayward, CA	06	California	001	Alameda	37.814781	-122.282347
07/18/2014	AQS	060010011	3	3.5	ug/m3 LC	15	Oakland West	1	100.0000	88101	PM2.5 - Local Conditions	41860	San Francisco-Oakland-Hayward, CA	06	California	001	Alameda	37.814781	-122.282347
07/19/2014	AQS	060010011	3	3.6	ug/m3 LC	15	Oakland West	1	100.0000	88101	PM2.5 - Local Conditions	41860	San Francisco-Oakland-Hayward, CA	06	California	001	Alameda	37.814781	-122.282347
07/20/2014	AQS	060010011	3	3.2	ug/m3 LC	13	Oakland West	1	100.0000	88101	PM2.5 - Local Conditions	41860	San Francisco-Oakland-Hayward, CA	06	California	001	Alameda	37.814781	-122.282347
07/21/2014	AQS	060010011	3	2.4	ug/m3 LC	10	Oakland West	1	100.0000	88101	PM2.5 - Local Conditions	41860	San Francisco-Oakland-Hayward, CA	06	California	001	Alameda	37.814781	-122.282347
07/22/2014	AQS	060010011	3	2.6	ug/m3 LC	11	Oakland West	1	100.0000	88101	PM2.5 - Local Conditions	41860	San Francisco-Oakland-Hayward, CA	06	California	001	Alameda	37.814781	-122.282347
07/23/2014	AQS	060010011	3	2.5	ug/m3 LC	10	Oakland West	1	100.0000	88101	PM2.5 - Local Conditions	41860	San Francisco-Oakland-Hayward, CA	06	California	001	Alameda	37.814781	-122.282347
07/24/2014	AQS	060010011	3	8.3	ug/m3 LC	35	Oakland West	1	100.0000	88101	PM2.5 - Local Conditions	41860	San Francisco-Oakland-Hayward, CA	06	California	001	Alameda	37.814781	-122.282347
07/25/2014	AQS	060010011	3	16.4	ug/m3 LC	60	Oakland West	1	100.0000	88101	PM2.5 - Local Conditions	41860	San Francisco-Oakland-Hayward, CA	06	California	001	Alameda	37.814781	-122.282347
07/26/2014	AQS	060010011	3	14.5	ug/m3 LC	56	Oakland West	1	100.0000	88101	PM2.5 - Local Conditions	41860	San Francisco-Oakland-Hayward, CA	06	California	001	Alameda	37.814781	-122.282347
07/27/2014	AQS	060010011	3	10.9	ug/m3 LC	45	Oakland West	1	100.0000	88101	PM2.5 - Local Conditions	41860	San Francisco-Oakland-Hayward, CA	06	California	001	Alameda	37.814781	-122.282347
07/28/2014	AQS	060010011	3	6.9	ug/m3 LC	29	Oakland West	1	100.0000	88101	PM2.5 - Local Conditions	41860	San Francisco-Oakland-Hayward, CA	06	California	001	Alameda	37.814781	-122.282347
07/29/2014	AQS	060010011	3	6.6	ug/m3 LC	28	Oakland West	1	100.0000	88101	PM2.5 - Local Conditions	41860	San Francisco-Oakland-Hayward, CA	06	California	001	Alameda	37.814781	-122.282347
07/30/2014	AQS	060010011	3	7	ug/m3 LC	29	Oakland West	1	100.0000	88101	PM2.5 - Local Conditions	41860	San Francisco-Oakland-Hayward, CA	06	California	001	Alameda	37.814781	-122.282347
07/31/2014	AQS	060010011	3	7.6	ug/m3 LC	32	Oakland West	1	100.0000	88101	PM2.5 - Local Conditions	41860	San Francisco-Oakland-Hayward, CA	06	California	001	Alameda	37.814781	-122.282347
08/01/2014	AQS	060010011	3	11.2	ug/m3 LC	47	Oakland West	1	100.0000	88101	PM2.5 - Local Conditions	41860	San Francisco-Oakland-Hayward, CA	06	California	001	Alameda	37.814781	-122.282347
08/02/2014	AQS	060010011	3	8.7	ug/m3 LC	36	Oakland West	1	100.0000	88101	PM2.5 - Local Conditions	41860	San Francisco-Oakland-Hayward, CA	06	California	001	Alameda	37.814781	-122.282347
08/03/2014	AQS	060010011	3	8.2	ug/m3 LC	34	Oakland West	1	100.0000	88101	PM2.5 - Local Conditions	41860	San Francisco-Oakland-Hayward, CA	06	California	001	Alameda	37.814781	-122.282347
08/04/2014	AQS	060010011	3	4.3	ug/m3 LC	18	Oakland West	1	100.0000	88101	PM2.5 - Local Conditions	41860	San Francisco-Oakland-Hayward, CA	06	California	001	Alameda	37.814781	-122.282347
08/05/2014	AQS	060010011	3	5.2	ug/m3 LC	22	Oakland West	1	100.0000	88101	PM2.5 - Local Conditions	41860	San Francisco-Oakland-Hayward, CA	06	California	001	Alameda	37.814781	-122.282347
08/06/2014	AQS	060010011	3	9	ug/m3 LC	38	Oakland West	1	100.0000	88101	PM2.5 - Local Conditions	41860	San Francisco-Oakland-Hayward, CA	06	California	001	Alameda	37.814781	-122.282347
08/07/2014	AQS	060010011	3	9.7	ug/m3 LC	40	Oakland West	1	100.0000	88101	PM2.5 - Local Conditions	41860	San Francisco-Oakland-Hayward, CA	06	California	001	Alameda	37.814781	-122.282347
08/08/2014	AQS	060010011	3	15.7	ug/m3 LC	59	Oakland West	1	100.0000	88101	PM2.5 - Local Conditions	41860	San Francisco-Oakland-Hayward, CA	06	California	001	Alameda	37.814781	-122.282347
08/09/2014	AQS	060010011	3	11.2	ug/m3 LC	47	Oakland West	1	100.0000	88101	PM2.5 - Local Conditions	41860	San Francisco-Oakland-Hayward, CA	06	California	001	Alameda	37.814781	-122.282347
08/10/2014	AQS	060010011	3	4.7	ug/m3 LC	20	Oakland West	1	100.0000	88101	PM2.5 - Local Conditions	41860	San Francisco-Oakland-Hayward, CA	06	California	001	Alameda	37.814781	-122.282347
08/11/2014	AQS	060010011	3	6.7	ug/m3 LC	28	Oakland West	1	100.0000	88101	PM2.5 - Local Conditions	41860	San Francisco-Oakland-Hayward, CA	06	California	001	Alameda	37.814781	-122.282347
08/12/2014	AQS	060010011	3	5	ug/m3 LC	21	Oakland West	1	100.0000	88101	PM2.5 - Local Conditions	41860	San Francisco-Oakland-Hayward, CA	06	California	001	Alameda	37.814781	-122.282347
08/13/2014	AQS	060010011	3	4.7	ug/m3 LC	20	Oakland West	1	100.0000	88101	PM2.5 - Local Conditions	41860	San Francisco-Oakland-Hayward, CA	06	California	001	Alameda	37.814781	-122.282347
08/14/2014	AQS	060010011	3	3.6	ug/m3 LC	15	Oakland West	1	100.0000	88101	PM2.5 - Local Conditions	41860	San Francisco-Oakland-Hayward, CA	06	California	001	Alameda	37.814781	-122.282347
08/15/2014	AQS	060010011	3	6.8	ug/m3 LC	28	Oakland West	1	100.0000	88101	PM2.5 - Local Conditions	41860	San Francisco-Oakland-Hayward, CA	06	California	001	Alameda	37.814781	-122.282347
08/16/2014	AQS	060010011	3	6.3	ug/m3 LC	26	Oakland West	1	100.0000	88101	PM2.5 - Local Conditions	41860	San Francisco-Oakland-Hayward, CA	06	California	001	Alameda	37.814781	-122.282347
08/17/2014	AQS	060010011	3	3.8	ug/m3 LC	16	Oakland West	1	100.0000	88101	PM2.5 - Local Conditions	41860	San Francisco-Oakland-Hayward, CA	06	California	001	Alameda	37.814781	-122.282347
08/18/2014	AQS	060010011	3	4.7	ug/m3 LC	20	Oakland West	1	100.0000	88101	PM2.5 - Local Conditions	41860	San Francisco-Oakland-Hayward, CA	06	California	001	Alameda	37.814781	-122.282347
08/19/2014	AQS	060010011	3	3	ug/m3 LC	13	Oakland West	1	100.0000	88101	PM2.5 - Local Conditions	41860	San Francisco-Oakland-Hayward, CA	06	California	001	Alameda	37.814781	-122.282347
08/20/2014	AQS	060010011	3	3.6	ug/m3 LC	15	Oakland West	1	100.0000	88101	PM2.5 - Local Conditions	41860	San Francisco-Oakland-Hayward, CA	06	California	001	Alameda	37.814781	-122.282347
08/21/2014	AQS	060010011	3	3.7	ug/m3 LC	15	Oakland West	1	100.0000	88101	PM2.5 - Local Conditions	41860	San Francisco-Oakland-Hayward, CA	06	California	001	Alameda	37.814781	-122.282347
08/22/2014	AQS	060010011	3	4.5	ug/m3 LC	19	Oakland West	1	100.0000	88101	PM2.5 - Local Conditions	41860	San Francisco-Oakland-Hayward, CA	06	California	001	Alameda	37.814781	-122.282347
08/23/2014	AQS	060010011	3	5.3	ug/m3 LC	22	Oakland West	1	100.0000	88101	PM2.5 - Local Conditions	41860	San Francisco-Oakland-Hayward, CA	06	California	001	Alameda	37.814781	-122.282347
08/24/2014	AQS	060010011	3	4.1	ug/m3 LC	17	Oakland West	1	100.0000	88101	PM2.5 - Local Conditions	41860	San Francisco-Oakland-Hayward, CA	06	California	001	Alameda	37.814781	-122.282347
08/25/2014	AQS	060010011	3	6.7	ug/m3 LC	28	Oakland West	1	100.0000	88101	PM2.5 - Local Conditions	41860	San Francisco-Oakland-Hayward, CA	06	California	001	Alameda	37.814781	-122.282347
08/26/2014	AQS	060010011	3	5.5	ug/m3 LC	23	Oakland West	1	100.0000	88101	PM2.5 - Local Conditions	41860	San Francisco-Oakland-Hayward, CA	06	California	001	Alameda	37.814781	-122.282347
08/27/2014	AQS	060010011	3	7.8	ug/m3 LC	33	Oakland West	1	100.0000	88101	PM2.5 - Local Conditions	41860	San Francisco-Oakland-Hayward, CA	06	California	001	Alameda	37.814781	-122.282347
08/28/2014	AQS	060010011	3	6.1	ug/m3 LC	25	Oakland West	1	100.0000	88101	PM2.5 - Local Conditions	41860	San Francisco-Oakland-Hayward, CA	06	California	001	Alameda	37.814781	-122.282347
08/29/2014	AQS	060010011	3	5	ug/m3 LC	21	Oakland West	1	100.0000	88101	PM2.5 - Local Conditions	41860	San Francisco-Oakland-Hayward, CA	06	California	001	Alameda	37.814781	-122.282347
08/30/2014	AQS	060010011	3	7	ug/m3 LC	29	Oakland West	1	100.0000	88101	PM2.5 - Local Conditions	41860	San Francisco-Oakland-Hayward, CA	06	California	001	Alameda	37.814781	-122.282347
08/31/2014	AQS	060010011	3	8.6	ug/m3 LC	36	Oakland West	1	100.0000	88101	PM2.5 - Local Conditions	41860	San Francisco-Oakland-Hayward, CA	06	California	001	Alameda	37.814781	-122.282347
09/01/2014	AQS	060010011	3	12.4	ug/m3 LC	52	Oakland West	1	100.0000	88101	PM2.5 - Local Conditions	41860	San Francisco-Oakland-Hayward, CA	06	California	001	Alameda	37.814781	-122.282347
09/02/2014	AQS	060010011	3	6.9	ug/m3 LC	29	Oakland West	1	100.0000	88101	PM2.5 - Local Conditions	41860	San Francisco-Oakland-Hayward, CA	06	California	001	Alameda	37.814781	-122.282347
09/03/2014	AQS	060010011	3	8.6	ug/m3 LC	36	Oakland West	1	100.0000	88101	PM2.5 - Local Conditions	41860	San Francisco-Oakland-Hayward, CA	06	California	001	Alameda	37.814781	-122.282347
09/04/2014	AQS	060010011	3	10.7	ug/m3 LC	45	Oakland West	1	100.0000	88101	PM2.5 - Local Conditions	41860	San Francisco-Oakland-Hayward, CA	06	California	001	Alameda	37.814781	-122.282347
09/05/2014	AQS	060010011	3	18.3	ug/m3 LC	64	Oakland West	1	100.0000	88101	PM2.5 - Local Conditions	41860	San Francisco-Oakland-Hayward, CA	06	California	001	Alameda	37.814781	-122.282347
09/06/2014	AQS	060010011	3	20.7	ug/m3 LC	69	Oakland West	1	100.0000	88101	PM2.5 - Local Conditions	41860	San Francisco-Oakland-Hayward, CA	06	California	001	Alameda	37.814781	-122.282347
09/07/2014	AQS	060010011	3	12.8	ug/m3 LC	52	Oakland West	1	100.0000	88101	PM2.5 - Local Conditions	41860	San Francisco-Oakland-Hayward, CA	06	California	001	Alameda	37.814781	-122.282347
09/08/2014	AQS	060010011	3	11.9	ug/m3 LC	50	Oakland West	1	100.0000	88101	PM2.5 - Local Conditions	41860	San Francisco-Oakland-Hayward, CA	06	California	001	Alameda	37.814781	-122.282347
09/09/2014	AQS	060010011	3	10.2	ug/m3 LC	43	Oakland West	1	100.0000	88101	PM2.5 - Local Conditions	41860	San Francisco-Oakland-Hayward, CA	06	California	001	Alameda	37.814781	-122.282347
09/10/2014	AQS	060010011	3	13.4	ug/m3 LC	54	Oakland West	1	100.0000	88101	PM2.5 - Local Conditions	41860	San Francisco-Oakland-Hayward, CA	06	California	001	Alameda	37.814781	-122.282347
09/11/2014	AQS	060010011	3	12.5	ug/m3 LC	52	Oakland West	1	100.0000	88101	PM2.5 - Local Conditions	41860	San Francisco-Oakland-Hayward, CA	06	California	001	Alameda	37.814781	-122.282347
09/12/2014	AQS	060010011	3	11.1	ug/m3 LC	46	Oakland West	1	100.0000	88101	PM2.5 - Local Conditions	41860	San Francisco-Oakland-Hayward, CA	06	California	001	Alameda	37.814781	-122.282347
09/13/2014	AQS	060010011	3	8.8	ug/m3 LC	37	Oakland West	1	100.0000	88101	PM2.5 - Local Conditions	41860	San Francisco-Oakland-Hayward, CA	06	California	001	Alameda	37.814781	-122.282347
09/14/2014	AQS	060010011	3	11.5	ug/m3 LC	48	Oakland West	1	100.0000	88101	PM2.5 - Local Conditions	41860	San Francisco-Oakland-Hayward, CA	06	California	001	Alameda	37.814781	-122.282347
09/15/2014	AQS	060010011	3	9	ug/m3 LC	38	Oakland West	1	100.0000	88101	PM2.5 - Local Conditions	41860	San Francisco-Oakland-Hayward, CA	06	California	001	Alameda	37.814781	-122.282347
09/16/2014	AQS	060010011	3	8.2	ug/m3 LC	34	Oakland West	1	100.0000	88101	PM2.5 - Local Conditions	41860	San Francisco-Oakland-Hayward, CA	06	California	001	Alameda	37.814781	-122.282347
09/17/2014	AQS	060010011	3	5.6	ug/m3 LC	23	Oakland West	1	100.0000	88101	PM2.5 - Local Conditions	41860	San Francisco-Oakland-Hayward, CA	06	California	001	Alameda	37.814781	-122.282347
09/18/2014	AQS	060010011	3	4.8	ug/m3 LC	20	Oakland West	1	100.0000	88101	PM2.5 - Local Conditions	41860	San Francisco-Oakland-Hayward, CA	06	California	001	Alameda	37.814781	-122.282347
09/19/2014	AQS	060010011	3	7	ug/m3 LC	29	Oakland West	1	100.0000	88101	PM2.5 - Local Conditions	41860	San Francisco-Oakland-Hayward, CA	06	California	001	Alameda	37.814781	-122.282347
09/20/2014	AQS	060010011	3	3	ug/m3 LC	13	Oakland West	1	100.0000	88101	PM2.5 - Local Conditions	41860	San Francisco-Oakland-Hayward, CA	06	California	001	Alameda	37.814781	-122.282347
09/21/2014	AQS	060010011	3	2.8	ug/m3 LC	12	Oakland West	1	100.0000	88101	PM2.5 - Local Conditions	41860	San Francisco-Oakland-Hayward, CA	06	California	001	Alameda	37.814781	-122.282347
09/22/2014	AQS	060010011	3	5.6	ug/m3 LC	23	Oakland West	1	100.0000	88101	PM2.5 - Local Conditions	41860	San Francisco-Oakland-Hayward, CA	06	California	001	Alameda	37.814781	-122.282347
09/23/2014	AQS	060010011	3	2.5	ug/m3 LC	10	Oakland West	1	100.0000	88101	PM2.5 - Local Conditions	41860	San Francisco-Oakland-Hayward, CA	06	California	001	Alameda	37.814781	-122.282347
09/24/2014	AQS	060010011	3	0.8	ug/m3 LC	3	Oakland West	1	100.0000	88101	PM2.5 - Local Conditions	41860	San Francisco-Oakland-Hayward, CA	06	California	001	Alameda	37.814781	-122.282347
09/25/2014	AQS	060010011	3	3.4	ug/m3 LC	14	Oakland West	1	100.0000	88101	PM2.5 - Local Conditions	41860	San Francisco-Oakland-Hayward, CA	06	California	001	Alameda	37.814781	-122.282347
09/26/2014	AQS	060010011	3	5.4	ug/m3 LC	23	Oakland West	1	100.0000	88101	PM2.5 - Local Conditions	41860	San Francisco-Oakland-Hayward, CA	06	California	001	Alameda	37.814781	-122.282347
09/27/2014	AQS	060010011	3	9.1	ug/m3 LC	38	Oakland West	1	100.0000	88101	PM2.5 - Local Conditions	41860	San Francisco-Oakland-Hayward, CA	06	California	001	Alameda	37.814781	-122.282347
09/28/2014	AQS	060010011	3	9.3	ug/m3 LC	39	Oakland West	1	100.0000	88101	PM2.5 - Local Conditions	41860	San Francisco-Oakland-Hayward, CA	06	California	001	Alameda	37.814781	-122.282347
09/29/2014	AQS	060010011	3	10.1	ug/m3 LC	42	Oakland West	1	100.0000	88101	PM2.5 - Local Conditions	41860	San Francisco-Oakland-Hayward, CA	06	California	001	Alameda	37.814781	-122.282347
09/30/2014	AQS	060010011	3	7.8	ug/m3 LC	33	Oakland West	1	100.0000	88101	PM2.5 - Local Conditions	41860	San Francisco-Oakland-Hayward, CA	06	California	001	Alameda	37.814781	-122.282347
10/01/2014	AQS	060010011	3	10.2	ug/m3 LC	43	Oakland West	1	100.0000	88101	PM2.5 - Local Conditions	41860	San Francisco-Oakland-Hayward, CA	06	California	001	Alameda	37.814781	-122.282347
10/02/2014	AQS	060010011	3	11.5	ug/m3 LC	48	Oakland West	1	100.0000	88101	PM2.5 - Local Conditions	41860	San Francisco-Oakland-Hayward, CA	06	California	001	Alameda	37.814781	-122.282347
10/03/2014	AQS	060010011	3	12	ug/m3 LC	50	Oakland West	1	100.0000	88101	PM2.5 - Local Conditions	41860	San Francisco-Oakland-Hayward, CA	06	California	001	Alameda	37.814781	-122.282347
10/04/2014	AQS	060010011	3	10	ug/m3 LC	42	Oakland West	1	100.0000	88101	PM2.5 - Local Conditions	41860	San Francisco-Oakland-Hayward, CA	06	California	001	Alameda	37.814781	-122.282347
10/05/2014	AQS	060010011	3	9	ug/m3 LC	38	Oakland West	1	100.0000	88101	PM2.5 - Local Conditions	41860	San Francisco-Oakland-Hayward, CA	06	California	001	Alameda	37.814781	-122.282347
10/06/2014	AQS	060010011	3	7.3	ug/m3 LC	30	Oakland West	1	100.0000	88101	PM2.5 - Local Conditions	41860	San Francisco-Oakland-Hayward, CA	06	California	001	Alameda	37.814781	-122.282347
10/07/2014	AQS	060010011	3	11	ug/m3 LC	46	Oakland West	1	100.0000	88101	PM2.5 - Local Conditions	41860	San Francisco-Oakland-Hayward, CA	06	California	001	Alameda	37.814781	-122.282347
10/08/2014	AQS	060010011	3	12	ug/m3 LC	50	Oakland West	1	100.0000	88101	PM2.5 - Local Conditions	41860	San Francisco-Oakland-Hayward, CA	06	California	001	Alameda	37.814781	-122.282347
10/09/2014	AQS	060010011	3	9.7	ug/m3 LC	40	Oakland West	1	100.0000	88101	PM2.5 - Local Conditions	41860	San Francisco-Oakland-Hayward, CA	06	California	001	Alameda	37.814781	-122.282347
10/10/2014	AQS	060010011	3	8.7	ug/m3 LC	36	Oakland West	1	100.0000	88101	PM2.5 - Local Conditions	41860	San Francisco-Oakland-Hayward, CA	06	California	001	Alameda	37.814781	-122.282347
10/11/2014	AQS	060010011	3	8.3	ug/m3 LC	35	Oakland West	1	100.0000	88101	PM2.5 - Local Conditions	41860	San Francisco-Oakland-Hayward, CA	06	California	001	Alameda	37.814781	-122.282347
10/12/2014	AQS	060010011	3	15	ug/m3 LC	57	Oakland West	1	100.0000	88101	PM2.5 - Local Conditions	41860	San Francisco-Oakland-Hayward, CA	06	California	001	Alameda	37.814781	-122.282347
10/13/2014	AQS	060010011	3	12.7	ug/m3 LC	52	Oakland West	1	100.0000	88101	PM2.5 - Local Conditions	41860	San Francisco-Oakland-Hayward, CA	06	California	001	Alameda	37.814781	-122.282347
10/14/2014	AQS	060010011	3	10.9	ug/m3 LC	45	Oakland West	1	100.0000	88101	PM2.5 - Local Conditions	41860	San Francisco-Oakland-Hayward, CA	06	California	001	Alameda	37.814781	-122.282347
10/15/2014	AQS	060010011	3	7	ug/m3 LC	29	Oakland West	1	100.0000	88101	PM2.5 - Local Conditions	41860	San Francisco-Oakland-Hayward, CA	06	California	001	Alameda	37.814781	-122.282347
10/16/2014	AQS	060010011	3	8.1	ug/m3 LC	34	Oakland West	1	100.0000	88101	PM2.5 - Local Conditions	41860	San Francisco-Oakland-Hayward, CA	06	California	001	Alameda	37.814781	-122.282347
10/17/2014	AQS	060010011	3	6.8	ug/m3 LC	28	Oakland West	1	100.0000	88101	PM2.5 - Local Conditions	41860	San Francisco-Oakland-Hayward, CA	06	California	001	Alameda	37.814781	-122.282347
10/18/2014	AQS	060010011	3	6.8	ug/m3 LC	28	Oakland West	1	100.0000	88101	PM2.5 - Local Conditions	41860	San Francisco-Oakland-Hayward, CA	06	California	001	Alameda	37.814781	-122.282347
10/19/2014	AQS	060010011	3	5.2	ug/m3 LC	22	Oakland West	1	100.0000	88101	PM2.5 - Local Conditions	41860	San Francisco-Oakland-Hayward, CA	06	California	001	Alameda	37.814781	-122.282347
10/20/2014	AQS	060010011	3	3.8	ug/m3 LC	16	Oakland West	1	100.0000	88101	PM2.5 - Local Conditions	41860	San Francisco-Oakland-Hayward, CA	06	California	001	Alameda	37.814781	-122.282347
10/21/2014	AQS	060010011	3	4.1	ug/m3 LC	17	Oakland West	1	100.0000	88101	PM2.5 - Local Conditions	41860	San Francisco-Oakland-Hayward, CA	06	California	001	Alameda	37.814781	-122.282347
10/22/2014	AQS	060010011	3	7.1	ug/m3 LC	30	Oakland West	1	100.0000	88101	PM2.5 - Local Conditions	41860	San Francisco-Oakland-Hayward, CA	06	California	001	Alameda	37.814781	-122.282347
10/23/2014	AQS	060010011	3	8.9	ug/m3 LC	37	Oakland West	1	100.0000	88101	PM2.5 - Local Conditions	41860	San Francisco-Oakland-Hayward, CA	06	California	001	Alameda	37.814781	-122.282347
10/24/2014	AQS	060010011	3	6.8	ug/m3 LC	28	Oakland West	1	100.0000	88101	PM2.5 - Local Conditions	41860	San Francisco-Oakland-Hayward, CA	06	California	001	Alameda	37.814781	-122.282347
10/25/2014	AQS	060010011	3	6.7	ug/m3 LC	28	Oakland West	1	100.0000	88101	PM2.5 - Local Conditions	41860	San Francisco-Oakland-Hayward, CA	06	California	001	Alameda	37.814781	-122.282347
10/26/2014	AQS	060010011	3	6.6	ug/m3 LC	28	Oakland West	1	100.0000	88101	PM2.5 - Local Conditions	41860	San Francisco-Oakland-Hayward, CA	06	California	001	Alameda	37.814781	-122.282347
10/27/2014	AQS	060010011	3	9	ug/m3 LC	38	Oakland West	1	100.0000	88101	PM2.5 - Local Conditions	41860	San Francisco-Oakland-Hayward, CA	06	California	001	Alameda	37.814781	-122.282347
10/28/2014	AQS	060010011	3	8.3	ug/m3 LC	35	Oakland West	1	100.0000	88101	PM2.5 - Local Conditions	41860	San Francisco-Oakland-Hayward, CA	06	California	001	Alameda	37.814781	-122.282347
10/29/2014	AQS	060010011	3	11.5	ug/m3 LC	48	Oakland West	1	100.0000	88101	PM2.5 - Local Conditions	41860	San Francisco-Oakland-Hayward, CA	06	California	001	Alameda	37.814781	-122.282347
10/30/2014	AQS	060010011	3	11.3	ug/m3 LC	47	Oakland West	1	100.0000	88101	PM2.5 - Local Conditions	41860	San Francisco-Oakland-Hayward, CA	06	California	001	Alameda	37.814781	-122.282347
10/31/2014	AQS	060010011	3	5.2	ug/m3 LC	22	Oakland West	1	100.0000	88101	PM2.5 - Local Conditions	41860	San Francisco-Oakland-Hayward, CA	06	California	001	Alameda	37.814781	-122.282347
11/01/2014	AQS	060010011	3	6.5	ug/m3 LC	27	Oakland West	1	100.0000	88101	PM2.5 - Local Conditions	41860	San Francisco-Oakland-Hayward, CA	06	California	001	Alameda	37.814781	-122.282347
11/02/2014	AQS	060010011	3	8.5	ug/m3 LC	35	Oakland West	1	100.0000	88101	PM2.5 - Local Conditions	41860	San Francisco-Oakland-Hayward, CA	06	California	001	Alameda	37.814781	-122.282347
11/08/2014	AQS	060010011	3	12.8	ug/m3 LC	52	Oakland West	1	100.0000	88101	PM2.5 - Local Conditions	41860	San Francisco-Oakland-Hayward, CA	06	California	001	Alameda	37.814781	-122.282347
11/09/2014	AQS	060010011	3	8.1	ug/m3 LC	34	Oakland West	1	100.0000	88101	PM2.5 - Local Conditions	41860	San Francisco-Oakland-Hayward, CA	06	California	001	Alameda	37.814781	-122.282347
11/10/2014	AQS	060010011	3	12.4	ug/m3 LC	52	Oakland West	1	100.0000	88101	PM2.5 - Local Conditions	41860	San Francisco-Oakland-Hayward, CA	06	California	001	Alameda	37.814781	-122.282347
11/11/2014	AQS	060010011	3	7.5	ug/m3 LC	31	Oakland West	1	100.0000	88101	PM2.5 - Local Conditions	41860	San Francisco-Oakland-Hayward, CA	06	California	001	Alameda	37.814781	-122.282347
11/12/2014	AQS	060010011	3	6.7	ug/m3 LC	28	Oakland West	1	100.0000	88101	PM2.5 - Local Conditions	41860	San Francisco-Oakland-Hayward, CA	06	California	001	Alameda	37.814781	-122.282347
11/13/2014	AQS	060010011	3	4.2	ug/m3 LC	18	Oakland West	1	100.0000	88101	PM2.5 - Local Conditions	41860	San Francisco-Oakland-Hayward, CA	06	California	001	Alameda	37.814781	-122.282347
11/14/2014	AQS	060010011	3	8	ug/m3 LC	33	Oakland West	1	100.0000	88101	PM2.5 - Local Conditions	41860	San Francisco-Oakland-Hayward, CA	06	California	001	Alameda	37.814781	-122.282347
11/15/2014	AQS	060010011	3	9.7	ug/m3 LC	40	Oakland West	1	100.0000	88101	PM2.5 - Local Conditions	41860	San Francisco-Oakland-Hayward, CA	06	California	001	Alameda	37.814781	-122.282347
11/16/2014	AQS	060010011	3	5	ug/m3 LC	21	Oakland West	1	100.0000	88101	PM2.5 - Local Conditions	41860	San Francisco-Oakland-Hayward, CA	06	California	001	Alameda	37.814781	-122.282347
11/17/2014	AQS	060010011	3	6.2	ug/m3 LC	26	Oakland West	1	100.0000	88101	PM2.5 - Local Conditions	41860	San Francisco-Oakland-Hayward, CA	06	California	001	Alameda	37.814781	-122.282347
11/18/2014	AQS	060010011	3	17.5	ug/m3 LC	62	Oakland West	1	100.0000	88101	PM2.5 - Local Conditions	41860	San Francisco-Oakland-Hayward, CA	06	California	001	Alameda	37.814781	-122.282347
11/19/2014	AQS	060010011	3	9.3	ug/m3 LC	39	Oakland West	1	100.0000	88101	PM2.5 - Local Conditions	41860	San Francisco-Oakland-Hayward, CA	06	California	001	Alameda	37.814781	-122.282347
11/20/2014	AQS	060010011	3	10.1	ug/m3 LC	42	Oakland West	1	100.0000	88101	PM2.5 - Local Conditions	41860	San Francisco-Oakland-Hayward, CA	06	California	001	Alameda	37.814781	-122.282347
11/21/2014	AQS	060010011	3	12.6	ug/m3 LC	52	Oakland West	1	100.0000	88101	PM2.5 - Local Conditions	41860	San Francisco-Oakland-Hayward, CA	06	California	001	Alameda	37.814781	-122.282347
11/22/2014	AQS	060010011	3	6.5	ug/m3 LC	27	Oakland West	1	100.0000	88101	PM2.5 - Local Conditions	41860	San Francisco-Oakland-Hayward, CA	06	California	001	Alameda	37.814781	-122.282347
11/23/2014	AQS	060010011	3	8.5	ug/m3 LC	35	Oakland West	1	100.0000	88101	PM2.5 - Local Conditions	41860	San Francisco-Oakland-Hayward, CA	06	California	001	Alameda	37.814781	-122.282347
11/24/2014	AQS	060010011	3	14.2	ug/m3 LC	55	Oakland West	1	100.0000	88101	PM2.5 - Local Conditions	41860	San Francisco-Oakland-Hayward, CA	06	California	001	Alameda	37.814781	-122.282347
11/25/2014	AQS	060010011	3	17.5	ug/m3 LC	62	Oakland West	1	100.0000	88101	PM2.5 - Local Conditions	41860	San Francisco-Oakland-Hayward, CA	06	California	001	Alameda	37.814781	-122.282347
11/26/2014	AQS	060010011	3	20.7	ug/m3 LC	69	Oakland West	1	100.0000	88101	PM2.5 - Local Conditions	41860	San Francisco-Oakland-Hayward, CA	06	California	001	Alameda	37.814781	-122.282347
11/27/2014	AQS	060010011	3	26.1	ug/m3 LC	80	Oakland West	1	100.0000	88101	PM2.5 - Local Conditions	41860	San Francisco-Oakland-Hayward, CA	06	California	001	Alameda	37.814781	-122.282347
11/28/2014	AQS	060010011	3	14.5	ug/m3 LC	56	Oakland West	1	100.0000	88101	PM2.5 - Local Conditions	41860	San Francisco-Oakland-Hayward, CA	06	California	001	Alameda	37.814781	-122.282347
11/29/2014	AQS	060010011	3	7.3	ug/m3 LC	30	Oakland West	1	100.0000	88101	PM2.5 - Local Conditions	41860	San Francisco-Oakland-Hayward, CA	06	California	001	Alameda	37.814781	-122.282347
11/30/2014	AQS	060010011	3	5.7	ug/m3 LC	24	Oakland West	1	100.0000	88101	PM2.5 - Local Conditions	41860	San Francisco-Oakland-Hayward, CA	06	California	001	Alameda	37.814781	-122.282347
12/01/2014	AQS	060010011	3	11.5	ug/m3 LC	48	Oakland West	1	100.0000	88101	PM2.5 - Local Conditions	41860	San Francisco-Oakland-Hayward, CA	06	California	001	Alameda	37.814781	-122.282347
12/02/2014	AQS	060010011	3	3.5	ug/m3 LC	15	Oakland West	1	100.0000	88101	PM2.5 - Local Conditions	41860	San Francisco-Oakland-Hayward, CA	06	California	001	Alameda	37.814781	-122.282347
12/03/2014	AQS	060010011	3	2.3	ug/m3 LC	10	Oakland West	1	100.0000	88101	PM2.5 - Local Conditions	41860	San Francisco-Oakland-Hayward, CA	06	California	001	Alameda	37.814781	-122.282347
12/04/2014	AQS	060010011	3	5.2	ug/m3 LC	22	Oakland West	1	100.0000	88101	PM2.5 - Local Conditions	41860	San Francisco-Oakland-Hayward, CA	06	California	001	Alameda	37.814781	-122.282347
12/05/2014	AQS	060010011	3	5.5	ug/m3 LC	23	Oakland West	1	100.0000	88101	PM2.5 - Local Conditions	41860	San Francisco-Oakland-Hayward, CA	06	California	001	Alameda	37.814781	-122.282347
12/06/2014	AQS	060010011	3	3.7	ug/m3 LC	15	Oakland West	1	100.0000	88101	PM2.5 - Local Conditions	41860	San Francisco-Oakland-Hayward, CA	06	California	001	Alameda	37.814781	-122.282347
12/07/2014	AQS	060010011	3	10.2	ug/m3 LC	43	Oakland West	1	100.0000	88101	PM2.5 - Local Conditions	41860	San Francisco-Oakland-Hayward, CA	06	California	001	Alameda	37.814781	-122.282347
12/08/2014	AQS	060010011	3	8.8	ug/m3 LC	37	Oakland West	1	100.0000	88101	PM2.5 - Local Conditions	41860	San Francisco-Oakland-Hayward, CA	06	California	001	Alameda	37.814781	-122.282347
12/09/2014	AQS	060010011	3	13.6	ug/m3 LC	54	Oakland West	1	100.0000	88101	PM2.5 - Local Conditions	41860	San Francisco-Oakland-Hayward, CA	06	California	001	Alameda	37.814781	-122.282347
12/10/2014	AQS	060010011	3	10.6	ug/m3 LC	44	Oakland West	1	100.0000	88101	PM2.5 - Local Conditions	41860	San Francisco-Oakland-Hayward, CA	06	California	001	Alameda	37.814781	-122.282347
12/11/2014	AQS	060010011	3	5.9	ug/m3 LC	25	Oakland West	1	100.0000	88101	PM2.5 - Local Conditions	41860	San Francisco-Oakland-Hayward, CA	06	California	001	Alameda	37.814781	-122.282347
12/12/2014	AQS	060010011	3	8.1	ug/m3 LC	34	Oakland West	1	100.0000	88101	PM2.5 - Local Conditions	41860	San Francisco-Oakland-Hayward, CA	06	California	001	Alameda	37.814781	-122.282347
12/13/2014	AQS	060010011	3	11.7	ug/m3 LC	49	Oakland West	1	100.0000	88101	PM2.5 - Local Conditions	41860	San Francisco-Oakland-Hayward, CA	06	California	001	Alameda	37.814781	-122.282347
12/14/2014	AQS	060010011	3	8.9	ug/m3 LC	37	Oakland West	1	100.0000	88101	PM2.5 - Local Conditions	41860	San Francisco-Oakland-Hayward, CA	06	California	001	Alameda	37.814781	-122.282347
12/15/2014	AQS	060010011	3	6.4	ug/m3 LC	27	Oakland West	1	100.0000	88101	PM2.5 - Local Conditions	41860	San Francisco-Oakland-Hayward, CA	06	California	001	Alameda	37.814781	-122.282347
12/16/2014	AQS	060010011	3	5.5	ug/m3 LC	23	Oakland West	1	100.0000	88101	PM2.5 - Local Conditions	41860	San Francisco-Oakland-Hayward, CA	06	California	001	Alameda	37.814781	-122.282347
12/17/2014	AQS	060010011	3	7.2	ug/m3 LC	30	Oakland West	1	100.0000	88101	PM2.5 - Local Conditions	41860	San Francisco-Oakland-Hayward, CA	06	California	001	Alameda	37.814781	-122.282347
12/18/2014	AQS	060010011	3	10.1	ug/m3 LC	42	Oakland West	1	100.0000	88101	PM2.5 - Local Conditions	41860	San Francisco-Oakland-Hayward, CA	06	California	001	Alameda	37.814781	-122.282347
12/19/2014	AQS	060010011	3	5.7	ug/m3 LC	24	Oakland West	1	100.0000	88101	PM2.5 - Local Conditions	41860	San Francisco-Oakland-Hayward, CA	06	California	001	Alameda	37.814781	-122.282347
12/20/2014	AQS	060010011	3	12.4	ug/m3 LC	52	Oakland West	1	100.0000	88101	PM2.5 - Local Conditions	41860	San Francisco-Oakland-Hayward, CA	06	California	001	Alameda	37.814781	-122.282347
12/21/2014	AQS	060010011	3	4.4	ug/m3 LC	18	Oakland West	1	100.0000	88101	PM2.5 - Local Conditions	41860	San Francisco-Oakland-Hayward, CA	06	California	001	Alameda	37.814781	-122.282347
12/22/2014	AQS	060010011	3	10.8	ug/m3 LC	45	Oakland West	1	100.0000	88101	PM2.5 - Local Conditions	41860	San Francisco-Oakland-Hayward, CA	06	California	001	Alameda	37.814781	-122.282347
12/23/2014	AQS	060010011	3	9.6	ug/m3 LC	40	Oakland West	1	100.0000	88101	PM2.5 - Local Conditions	41860	San Francisco-Oakland-Hayward, CA	06	California	001	Alameda	37.814781	-122.282347
12/24/2014	AQS	060010011	3	4.8	ug/m3 LC	20	Oakland West	1	100.0000	88101	PM2.5 - Local Conditions	41860	San Francisco-Oakland-Hayward, CA	06	California	001	Alameda	37.814781	-122.282347
12/25/2014	AQS	060010011	3	3.7	ug/m3 LC	15	Oakland West	1	100.0000	88101	PM2.5 - Local Conditions	41860	San Francisco-Oakland-Hayward, CA	06	California	001	Alameda	37.814781	-122.282347
12/26/2014	AQS	060010011	3	7.2	ug/m3 LC	30	Oakland West	1	100.0000	88101	PM2.5 - Local Conditions	41860	San Francisco-Oakland-Hayward, CA	06	California	001	Alameda	37.814781	-122.282347
12/27/2014	AQS	060010011	3	14.2	ug/m3 LC	55	Oakland West	1	100.0000	88101	PM2.5 - Local Conditions	41860	San Francisco-Oakland-Hayward, CA	06	California	001	Alameda	37.814781	-122.282347
12/28/2014	AQS	060010011	3	17.5	ug/m3 LC	62	Oakland West	1	100.0000	88101	PM2.5 - Local Conditions	41860	San Francisco-Oakland-Hayward, CA	06	California	001	Alameda	37.814781	-122.282347
12/29/2014	AQS	060010011	3	8.8	ug/m3 LC	37	Oakland West	1	100.0000	88101	PM2.5 - Local Conditions	41860	San Francisco-Oakland-Hayward, CA	06	California	001	Alameda	37.814781	-122.282347
12/30/2014	AQS	060010011	3	5.4	ug/m3 LC	23	Oakland West	1	100.0000	88101	PM2.5 - Local Conditions	41860	San Francisco-Oakland-Hayward, CA	06	California	001	Alameda	37.814781	-122.282347
12/31/2014	AQS	060010011	3	11.9	ug/m3 LC	50	Oakland West	1	100.0000	88101	PM2.5 - Local Conditions	41860	San Francisco-Oakland-Hayward, CA	06	California	001	Alameda	37.814781	-122.282347
01/05/2014	AQS	060010011	5	8.8	ug/m3 LC	37	Oakland West	1	100.0000	88502	Acceptable PM2.5 AQI & Speciation Mass	41860	San Francisco-Oakland-Hayward, CA	06	California	001	Alameda	37.814781	-122.282347
01/11/2014	AQS	060010011	5	9.5	ug/m3 LC	40	Oakland West	1	100.0000	88502	Acceptable PM2.5 AQI & Speciation Mass	41860	San Francisco-Oakland-Hayward, CA	06	California	001	Alameda	37.814781	-122.282347
01/17/2014	AQS	060010011	5	35.4	ug/m3 LC	100	Oakland West	1	100.0000	88502	Acceptable PM2.5 AQI & Speciation Mass	41860	San Francisco-Oakland-Hayward, CA	06	California	001	Alameda	37.814781	-122.282347
01/23/2014	AQS	060010011	5	13.4	ug/m3 LC	54	Oakland West	1	100.0000	88502	Acceptable PM2.5 AQI & Speciation Mass	41860	San Francisco-Oakland-Hayward, CA	06	California	001	Alameda	37.814781	-122.282347
01/29/2014	AQS	060010011	5	4.3	ug/m3 LC	18	Oakland West	1	100.0000	88502	Acceptable PM2.5 AQI & Speciation Mass	41860	San Francisco-Oakland-Hayward, CA	06	California	001	Alameda	37.814781	-122.282347
02/04/2014	AQS	060010011	5	5	ug/m3 LC	21	Oakland West	1	100.0000	88502	Acceptable PM2.5 AQI & Speciation Mass	41860	San Francisco-Oakland-Hayward, CA	06	California	001	Alameda	37.814781	-122.282347
02/10/2014	AQS	060010011	5	3.4	ug/m3 LC	14	Oakland West	1	100.0000	88502	Acceptable PM2.5 AQI & Speciation Mass	41860	San Francisco-Oakland-Hayward, CA	06	California	001	Alameda	37.814781	-122.282347
02/16/2014	AQS	060010011	5	3.8	ug/m3 LC	16	Oakland West	1	100.0000	88502	Acceptable PM2.5 AQI & Speciation Mass	41860	San Francisco-Oakland-Hayward, CA	06	California	001	Alameda	37.814781	-122.282347
02/22/2014	AQS	060010011	5	9.3	ug/m3 LC	39	Oakland West	1	100.0000	88502	Acceptable PM2.5 AQI & Speciation Mass	41860	San Francisco-Oakland-Hayward, CA	06	California	001	Alameda	37.814781	-122.282347
02/28/2014	AQS	060010011	5	2	ug/m3 LC	8	Oakland West	1	100.0000	88502	Acceptable PM2.5 AQI & Speciation Mass	41860	San Francisco-Oakland-Hayward, CA	06	California	001	Alameda	37.814781	-122.282347
03/06/2014	AQS	060010011	5	6.5	ug/m3 LC	27	Oakland West	1	100.0000	88502	Acceptable PM2.5 AQI & Speciation Mass	41860	San Francisco-Oakland-Hayward, CA	06	California	001	Alameda	37.814781	-122.282347
03/12/2014	AQS	060010011	5	1.6	ug/m3 LC	7	Oakland West	1	100.0000	88502	Acceptable PM2.5 AQI & Speciation Mass	41860	San Francisco-Oakland-Hayward, CA	06	California	001	Alameda	37.814781	-122.282347
03/18/2014	AQS	060010011	5	6.4	ug/m3 LC	27	Oakland West	1	100.0000	88502	Acceptable PM2.5 AQI & Speciation Mass	41860	San Francisco-Oakland-Hayward, CA	06	California	001	Alameda	37.814781	-122.282347
03/24/2014	AQS	060010011	5	8.3	ug/m3 LC	35	Oakland West	1	100.0000	88502	Acceptable PM2.5 AQI & Speciation Mass	41860	San Francisco-Oakland-Hayward, CA	06	California	001	Alameda	37.814781	-122.282347
03/30/2014	AQS	060010011	5	3.3	ug/m3 LC	14	Oakland West	1	100.0000	88502	Acceptable PM2.5 AQI & Speciation Mass	41860	San Francisco-Oakland-Hayward, CA	06	California	001	Alameda	37.814781	-122.282347
04/05/2014	AQS	060010011	5	4.6	ug/m3 LC	19	Oakland West	1	100.0000	88502	Acceptable PM2.5 AQI & Speciation Mass	41860	San Francisco-Oakland-Hayward, CA	06	California	001	Alameda	37.814781	-122.282347
04/11/2014	AQS	060010011	5	8	ug/m3 LC	33	Oakland West	1	100.0000	88502	Acceptable PM2.5 AQI & Speciation Mass	41860	San Francisco-Oakland-Hayward, CA	06	California	001	Alameda	37.814781	-122.282347
04/17/2014	AQS	060010011	5	10.2	ug/m3 LC	43	Oakland West	1	100.0000	88502	Acceptable PM2.5 AQI & Speciation Mass	41860	San Francisco-Oakland-Hayward, CA	06	California	001	Alameda	37.814781	-122.282347
04/23/2014	AQS	060010011	5	3.2	ug/m3 LC	13	Oakland West	1	100.0000	88502	Acceptable PM2.5 AQI & Speciation Mass	41860	San Francisco-Oakland-Hayward, CA	06	California	001	Alameda	37.814781	-122.282347
04/29/2014	AQS	060010011	5	9.4	ug/m3 LC	39	Oakland West	1	100.0000	88502	Acceptable PM2.5 AQI & Speciation Mass	41860	San Francisco-Oakland-Hayward, CA	06	California	001	Alameda	37.814781	-122.282347
05/05/2014	AQS	060010011	5	3.5	ug/m3 LC	15	Oakland West	1	100.0000	88502	Acceptable PM2.5 AQI & Speciation Mass	41860	San Francisco-Oakland-Hayward, CA	06	California	001	Alameda	37.814781	-122.282347
05/11/2014	AQS	060010011	5	4.3	ug/m3 LC	18	Oakland West	1	100.0000	88502	Acceptable PM2.5 AQI & Speciation Mass	41860	San Francisco-Oakland-Hayward, CA	06	California	001	Alameda	37.814781	-122.282347
05/17/2014	AQS	060010011	5	6.8	ug/m3 LC	28	Oakland West	1	100.0000	88502	Acceptable PM2.5 AQI & Speciation Mass	41860	San Francisco-Oakland-Hayward, CA	06	California	001	Alameda	37.814781	-122.282347
05/23/2014	AQS	060010011	5	3.6	ug/m3 LC	15	Oakland West	1	100.0000	88502	Acceptable PM2.5 AQI & Speciation Mass	41860	San Francisco-Oakland-Hayward, CA	06	California	001	Alameda	37.814781	-122.282347
05/29/2014	AQS	060010011	5	9	ug/m3 LC	38	Oakland West	1	100.0000	88502	Acceptable PM2.5 AQI & Speciation Mass	41860	San Francisco-Oakland-Hayward, CA	06	California	001	Alameda	37.814781	-122.282347
06/04/2014	AQS	060010011	5	11.1	ug/m3 LC	46	Oakland West	1	100.0000	88502	Acceptable PM2.5 AQI & Speciation Mass	41860	San Francisco-Oakland-Hayward, CA	06	California	001	Alameda	37.814781	-122.282347
06/22/2014	AQS	060010011	5	8.7	ug/m3 LC	36	Oakland West	1	100.0000	88502	Acceptable PM2.5 AQI & Speciation Mass	41860	San Francisco-Oakland-Hayward, CA	06	California	001	Alameda	37.814781	-122.282347
06/28/2014	AQS	060010011	5	4.4	ug/m3 LC	18	Oakland West	1	100.0000	88502	Acceptable PM2.5 AQI & Speciation Mass	41860	San Francisco-Oakland-Hayward, CA	06	California	001	Alameda	37.814781	-122.282347
07/04/2014	AQS	060010011	5	9.3	ug/m3 LC	39	Oakland West	1	100.0000	88502	Acceptable PM2.5 AQI & Speciation Mass	41860	San Francisco-Oakland-Hayward, CA	06	California	001	Alameda	37.814781	-122.282347
07/10/2014	AQS	060010011	5	1.9	ug/m3 LC	8	Oakland West	1	100.0000	88502	Acceptable PM2.5 AQI & Speciation Mass	41860	San Francisco-Oakland-Hayward, CA	06	California	001	Alameda	37.814781	-122.282347
07/16/2014	AQS	060010011	5	6	ug/m3 LC	25	Oakland West	1	100.0000	88502	Acceptable PM2.5 AQI & Speciation Mass	41860	San Francisco-Oakland-Hayward, CA	06	California	001	Alameda	37.814781	-122.282347
07/22/2014	AQS	060010011	5	1.8	ug/m3 LC	8	Oakland West	1	100.0000	88502	Acceptable PM2.5 AQI & Speciation Mass	41860	San Francisco-Oakland-Hayward, CA	06	California	001	Alameda	37.814781	-122.282347
07/28/2014	AQS	060010011	5	5.2	ug/m3 LC	22	Oakland West	1	100.0000	88502	Acceptable PM2.5 AQI & Speciation Mass	41860	San Francisco-Oakland-Hayward, CA	06	California	001	Alameda	37.814781	-122.282347
08/03/2014	AQS	060010011	5	4.6	ug/m3 LC	19	Oakland West	1	100.0000	88502	Acceptable PM2.5 AQI & Speciation Mass	41860	San Francisco-Oakland-Hayward, CA	06	California	001	Alameda	37.814781	-122.282347
08/09/2014	AQS	060010011	5	8.2	ug/m3 LC	34	Oakland West	1	100.0000	88502	Acceptable PM2.5 AQI & Speciation Mass	41860	San Francisco-Oakland-Hayward, CA	06	California	001	Alameda	37.814781	-122.282347
08/15/2014	AQS	060010011	5	4.5	ug/m3 LC	19	Oakland West	1	100.0000	88502	Acceptable PM2.5 AQI & Speciation Mass	41860	San Francisco-Oakland-Hayward, CA	06	California	001	Alameda	37.814781	-122.282347
08/21/2014	AQS	060010011	5	3.7	ug/m3 LC	15	Oakland West	1	100.0000	88502	Acceptable PM2.5 AQI & Speciation Mass	41860	San Francisco-Oakland-Hayward, CA	06	California	001	Alameda	37.814781	-122.282347
08/27/2014	AQS	060010011	5	6.5	ug/m3 LC	27	Oakland West	1	100.0000	88502	Acceptable PM2.5 AQI & Speciation Mass	41860	San Francisco-Oakland-Hayward, CA	06	California	001	Alameda	37.814781	-122.282347
09/02/2014	AQS	060010011	5	4.8	ug/m3 LC	20	Oakland West	1	100.0000	88502	Acceptable PM2.5 AQI & Speciation Mass	41860	San Francisco-Oakland-Hayward, CA	06	California	001	Alameda	37.814781	-122.282347
09/08/2014	AQS	060010011	5	8.4	ug/m3 LC	35	Oakland West	1	100.0000	88502	Acceptable PM2.5 AQI & Speciation Mass	41860	San Francisco-Oakland-Hayward, CA	06	California	001	Alameda	37.814781	-122.282347
09/14/2014	AQS	060010011	5	8.6	ug/m3 LC	36	Oakland West	1	100.0000	88502	Acceptable PM2.5 AQI & Speciation Mass	41860	San Francisco-Oakland-Hayward, CA	06	California	001	Alameda	37.814781	-122.282347
09/20/2014	AQS	060010011	5	3.1	ug/m3 LC	13	Oakland West	1	100.0000	88502	Acceptable PM2.5 AQI & Speciation Mass	41860	San Francisco-Oakland-Hayward, CA	06	California	001	Alameda	37.814781	-122.282347
09/26/2014	AQS	060010011	5	5.1	ug/m3 LC	21	Oakland West	1	100.0000	88502	Acceptable PM2.5 AQI & Speciation Mass	41860	San Francisco-Oakland-Hayward, CA	06	California	001	Alameda	37.814781	-122.282347
10/02/2014	AQS	060010011	5	8.4	ug/m3 LC	35	Oakland West	1	100.0000	88502	Acceptable PM2.5 AQI & Speciation Mass	41860	San Francisco-Oakland-Hayward, CA	06	California	001	Alameda	37.814781	-122.282347
10/08/2014	AQS	060010011	5	8.1	ug/m3 LC	34	Oakland West	1	100.0000	88502	Acceptable PM2.5 AQI & Speciation Mass	41860	San Francisco-Oakland-Hayward, CA	06	California	001	Alameda	37.814781	-122.282347
10/14/2014	AQS	060010011	5	7.3	ug/m3 LC	30	Oakland West	1	100.0000	88502	Acceptable PM2.5 AQI & Speciation Mass	41860	San Francisco-Oakland-Hayward, CA	06	California	001	Alameda	37.814781	-122.282347
10/20/2014	AQS	060010011	5	3.5	ug/m3 LC	15	Oakland West	1	100.0000	88502	Acceptable PM2.5 AQI & Speciation Mass	41860	San Francisco-Oakland-Hayward, CA	06	California	001	Alameda	37.814781	-122.282347
10/26/2014	AQS	060010011	5	4.3	ug/m3 LC	18	Oakland West	1	100.0000	88502	Acceptable PM2.5 AQI & Speciation Mass	41860	San Francisco-Oakland-Hayward, CA	06	California	001	Alameda	37.814781	-122.282347
11/01/2014	AQS	060010011	5	4.2	ug/m3 LC	18	Oakland West	1	100.0000	88502	Acceptable PM2.5 AQI & Speciation Mass	41860	San Francisco-Oakland-Hayward, CA	06	California	001	Alameda	37.814781	-122.282347
11/07/2014	AQS	060010011	5	7.9	ug/m3 LC	33	Oakland West	1	100.0000	88502	Acceptable PM2.5 AQI & Speciation Mass	41860	San Francisco-Oakland-Hayward, CA	06	California	001	Alameda	37.814781	-122.282347
11/13/2014	AQS	060010011	5	5.4	ug/m3 LC	23	Oakland West	1	100.0000	88502	Acceptable PM2.5 AQI & Speciation Mass	41860	San Francisco-Oakland-Hayward, CA	06	California	001	Alameda	37.814781	-122.282347
11/19/2014	AQS	060010011	5	7.7	ug/m3 LC	32	Oakland West	1	100.0000	88502	Acceptable PM2.5 AQI & Speciation Mass	41860	San Francisco-Oakland-Hayward, CA	06	California	001	Alameda	37.814781	-122.282347
11/25/2014	AQS	060010011	5	13.4	ug/m3 LC	54	Oakland West	1	100.0000	88502	Acceptable PM2.5 AQI & Speciation Mass	41860	San Francisco-Oakland-Hayward, CA	06	California	001	Alameda	37.814781	-122.282347
12/01/2014	AQS	060010011	5	12.4	ug/m3 LC	52	Oakland West	1	100.0000	88502	Acceptable PM2.5 AQI & Speciation Mass	41860	San Francisco-Oakland-Hayward, CA	06	California	001	Alameda	37.814781	-122.282347
12/07/2014	AQS	060010011	5	11.8	ug/m3 LC	49	Oakland West	1	100.0000	88502	Acceptable PM2.5 AQI & Speciation Mass	41860	San Francisco-Oakland-Hayward, CA	06	California	001	Alameda	37.814781	-122.282347
12/13/2014	AQS	060010011	5	11.5	ug/m3 LC	48	Oakland West	1	100.0000	88502	Acceptable PM2.5 AQI & Speciation Mass	41860	San Francisco-Oakland-Hayward, CA	06	California	001	Alameda	37.814781	-122.282347
12/19/2014	AQS	060010011	5	5.6	ug/m3 LC	23	Oakland West	1	100.0000	88502	Acceptable PM2.5 AQI & Speciation Mass	41860	San Francisco-Oakland-Hayward, CA	06	California	001	Alameda	37.814781	-122.282347
12/25/2014	AQS	060010011	5	2.4	ug/m3 LC	10	Oakland West	1	100.0000	88502	Acceptable PM2.5 AQI & Speciation Mass	41860	San Francisco-Oakland-Hayward, CA	06	California	001	Alameda	37.814781	-122.282347
12/31/2014	AQS	060010011	5	10.8	ug/m3 LC	45	Oakland West	1	100.0000	88502	Acceptable PM2.5 AQI & Speciation Mass	41860	San Francisco-Oakland-Hayward, CA	06	California	001	Alameda	37.814781	-122.282347
02/01/2014	AQS	060010012	3	5.1	ug/m3 LC	21	Laney College	1	100.0000	88101	PM2.5 - Local Conditions	41860	San Francisco-Oakland-Hayward, CA	06	California	001	Alameda	37.793624	-122.263376
02/02/2014	AQS	060010012	3	4.6	ug/m3 LC	19	Laney College	1	100.0000	88101	PM2.5 - Local Conditions	41860	San Francisco-Oakland-Hayward, CA	06	California	001	Alameda	37.793624	-122.263376
02/03/2014	AQS	060010012	3	7	ug/m3 LC	29	Laney College	1	100.0000	88101	PM2.5 - Local Conditions	41860	San Francisco-Oakland-Hayward, CA	06	California	001	Alameda	37.793624	-122.263376
02/04/2014	AQS	060010012	3	7.3	ug/m3 LC	30	Laney College	1	100.0000	88101	PM2.5 - Local Conditions	41860	San Francisco-Oakland-Hayward, CA	06	California	001	Alameda	37.793624	-122.263376
02/05/2014	AQS	060010012	3	6	ug/m3 LC	25	Laney College	1	100.0000	88101	PM2.5 - Local Conditions	41860	San Francisco-Oakland-Hayward, CA	06	California	001	Alameda	37.793624	-122.263376
02/06/2014	AQS	060010012	3	7.7	ug/m3 LC	32	Laney College	1	100.0000	88101	PM2.5 - Local Conditions	41860	San Francisco-Oakland-Hayward, CA	06	California	001	Alameda	37.793624	-122.263376
02/07/2014	AQS	060010012	3	8.1	ug/m3 LC	34	Laney College	1	100.0000	88101	PM2.5 - Local Conditions	41860	San Francisco-Oakland-Hayward, CA	06	California	001	Alameda	37.793624	-122.263376
02/08/2014	AQS	060010012	3	1.8	ug/m3 LC	8	Laney College	1	100.0000	88101	PM2.5 - Local Conditions	41860	San Francisco-Oakland-Hayward, CA	06	California	001	Alameda	37.793624	-122.263376
02/09/2014	AQS	060010012	3	3.5	ug/m3 LC	15	Laney College	1	100.0000	88101	PM2.5 - Local Conditions	41860	San Francisco-Oakland-Hayward, CA	06	California	001	Alameda	37.793624	-122.263376
02/10/2014	AQS	060010012	3	6.6	ug/m3 LC	28	Laney College	1	100.0000	88101	PM2.5 - Local Conditions	41860	San Francisco-Oakland-Hayward, CA	06	California	001	Alameda	37.793624	-122.263376
02/11/2014	AQS	060010012	3	9.2	ug/m3 LC	38	Laney College	1	100.0000	88101	PM2.5 - Local Conditions	41860	San Francisco-Oakland-Hayward, CA	06	California	001	Alameda	37.793624	-122.263376
02/12/2014	AQS	060010012	3	12	ug/m3 LC	50	Laney College	1	100.0000	88101	PM2.5 - Local Conditions	41860	San Francisco-Oakland-Hayward, CA	06	California	001	Alameda	37.793624	-122.263376
02/13/2014	AQS	060010012	3	9.3	ug/m3 LC	39	Laney College	1	100.0000	88101	PM2.5 - Local Conditions	41860	San Francisco-Oakland-Hayward, CA	06	California	001	Alameda	37.793624	-122.263376
02/14/2014	AQS	060010012	3	5.6	ug/m3 LC	23	Laney College	1	100.0000	88101	PM2.5 - Local Conditions	41860	San Francisco-Oakland-Hayward, CA	06	California	001	Alameda	37.793624	-122.263376
02/15/2014	AQS	060010012	3	6.3	ug/m3 LC	26	Laney College	1	100.0000	88101	PM2.5 - Local Conditions	41860	San Francisco-Oakland-Hayward, CA	06	California	001	Alameda	37.793624	-122.263376
02/16/2014	AQS	060010012	3	5	ug/m3 LC	21	Laney College	1	100.0000	88101	PM2.5 - Local Conditions	41860	San Francisco-Oakland-Hayward, CA	06	California	001	Alameda	37.793624	-122.263376
02/17/2014	AQS	060010012	3	5.5	ug/m3 LC	23	Laney College	1	100.0000	88101	PM2.5 - Local Conditions	41860	San Francisco-Oakland-Hayward, CA	06	California	001	Alameda	37.793624	-122.263376
02/18/2014	AQS	060010012	3	15	ug/m3 LC	57	Laney College	1	100.0000	88101	PM2.5 - Local Conditions	41860	San Francisco-Oakland-Hayward, CA	06	California	001	Alameda	37.793624	-122.263376
02/19/2014	AQS	060010012	3	6.5	ug/m3 LC	27	Laney College	1	100.0000	88101	PM2.5 - Local Conditions	41860	San Francisco-Oakland-Hayward, CA	06	California	001	Alameda	37.793624	-122.263376
02/20/2014	AQS	060010012	3	10.1	ug/m3 LC	42	Laney College	1	100.0000	88101	PM2.5 - Local Conditions	41860	San Francisco-Oakland-Hayward, CA	06	California	001	Alameda	37.793624	-122.263376
02/21/2014	AQS	060010012	3	10.2	ug/m3 LC	43	Laney College	1	100.0000	88101	PM2.5 - Local Conditions	41860	San Francisco-Oakland-Hayward, CA	06	California	001	Alameda	37.793624	-122.263376
02/22/2014	AQS	060010012	3	10.1	ug/m3 LC	42	Laney College	1	100.0000	88101	PM2.5 - Local Conditions	41860	San Francisco-Oakland-Hayward, CA	06	California	001	Alameda	37.793624	-122.263376
02/23/2014	AQS	060010012	3	8.5	ug/m3 LC	35	Laney College	1	100.0000	88101	PM2.5 - Local Conditions	41860	San Francisco-Oakland-Hayward, CA	06	California	001	Alameda	37.793624	-122.263376
02/24/2014	AQS	060010012	3	11.1	ug/m3 LC	46	Laney College	1	100.0000	88101	PM2.5 - Local Conditions	41860	San Francisco-Oakland-Hayward, CA	06	California	001	Alameda	37.793624	-122.263376
02/25/2014	AQS	060010012	3	11.7	ug/m3 LC	49	Laney College	1	100.0000	88101	PM2.5 - Local Conditions	41860	San Francisco-Oakland-Hayward, CA	06	California	001	Alameda	37.793624	-122.263376
02/26/2014	AQS	060010012	3	6.5	ug/m3 LC	27	Laney College	1	100.0000	88101	PM2.5 - Local Conditions	41860	San Francisco-Oakland-Hayward, CA	06	California	001	Alameda	37.793624	-122.263376
02/27/2014	AQS	060010012	3	5.7	ug/m3 LC	24	Laney College	1	100.0000	88101	PM2.5 - Local Conditions	41860	San Francisco-Oakland-Hayward, CA	06	California	001	Alameda	37.793624	-122.263376
02/28/2014	AQS	060010012	3	3.2	ug/m3 LC	13	Laney College	1	100.0000	88101	PM2.5 - Local Conditions	41860	San Francisco-Oakland-Hayward, CA	06	California	001	Alameda	37.793624	-122.263376
03/01/2014	AQS	060010012	3	2.9	ug/m3 LC	12	Laney College	1	100.0000	88101	PM2.5 - Local Conditions	41860	San Francisco-Oakland-Hayward, CA	06	California	001	Alameda	37.793624	-122.263376
03/02/2014	AQS	060010012	3	5	ug/m3 LC	21	Laney College	1	100.0000	88101	PM2.5 - Local Conditions	41860	San Francisco-Oakland-Hayward, CA	06	California	001	Alameda	37.793624	-122.263376
03/03/2014	AQS	060010012	3	6.1	ug/m3 LC	25	Laney College	1	100.0000	88101	PM2.5 - Local Conditions	41860	San Francisco-Oakland-Hayward, CA	06	California	001	Alameda	37.793624	-122.263376
03/04/2014	AQS	060010012	3	3.7	ug/m3 LC	15	Laney College	1	100.0000	88101	PM2.5 - Local Conditions	41860	San Francisco-Oakland-Hayward, CA	06	California	001	Alameda	37.793624	-122.263376
03/05/2014	AQS	060010012	3	9.7	ug/m3 LC	40	Laney College	1	100.0000	88101	PM2.5 - Local Conditions	41860	San Francisco-Oakland-Hayward, CA	06	California	001	Alameda	37.793624	-122.263376
03/06/2014	AQS	060010012	3	9.4	ug/m3 LC	39	Laney College	1	100.0000	88101	PM2.5 - Local Conditions	41860	San Francisco-Oakland-Hayward, CA	06	California	001	Alameda	37.793624	-122.263376
03/07/2014	AQS	060010012	3	7.9	ug/m3 LC	33	Laney College	1	100.0000	88101	PM2.5 - Local Conditions	41860	San Francisco-Oakland-Hayward, CA	06	California	001	Alameda	37.793624	-122.263376
03/08/2014	AQS	060010012	3	10.2	ug/m3 LC	43	Laney College	1	100.0000	88101	PM2.5 - Local Conditions	41860	San Francisco-Oakland-Hayward, CA	06	California	001	Alameda	37.793624	-122.263376
03/09/2014	AQS	060010012	3	9.1	ug/m3 LC	38	Laney College	1	100.0000	88101	PM2.5 - Local Conditions	41860	San Francisco-Oakland-Hayward, CA	06	California	001	Alameda	37.793624	-122.263376
03/10/2014	AQS	060010012	3	3.8	ug/m3 LC	16	Laney College	1	100.0000	88101	PM2.5 - Local Conditions	41860	San Francisco-Oakland-Hayward, CA	06	California	001	Alameda	37.793624	-122.263376
03/11/2014	AQS	060010012	3	1.5	ug/m3 LC	6	Laney College	1	100.0000	88101	PM2.5 - Local Conditions	41860	San Francisco-Oakland-Hayward, CA	06	California	001	Alameda	37.793624	-122.263376
03/12/2014	AQS	060010012	3	2.1	ug/m3 LC	9	Laney College	1	100.0000	88101	PM2.5 - Local Conditions	41860	San Francisco-Oakland-Hayward, CA	06	California	001	Alameda	37.793624	-122.263376
03/13/2014	AQS	060010012	3	9.7	ug/m3 LC	40	Laney College	1	100.0000	88101	PM2.5 - Local Conditions	41860	San Francisco-Oakland-Hayward, CA	06	California	001	Alameda	37.793624	-122.263376
03/14/2014	AQS	060010012	3	12.3	ug/m3 LC	51	Laney College	1	100.0000	88101	PM2.5 - Local Conditions	41860	San Francisco-Oakland-Hayward, CA	06	California	001	Alameda	37.793624	-122.263376
03/15/2014	AQS	060010012	3	7.3	ug/m3 LC	30	Laney College	1	100.0000	88101	PM2.5 - Local Conditions	41860	San Francisco-Oakland-Hayward, CA	06	California	001	Alameda	37.793624	-122.263376
03/16/2014	AQS	060010012	3	9.4	ug/m3 LC	39	Laney College	1	100.0000	88101	PM2.5 - Local Conditions	41860	San Francisco-Oakland-Hayward, CA	06	California	001	Alameda	37.793624	-122.263376
03/17/2014	AQS	060010012	3	6.7	ug/m3 LC	28	Laney College	1	100.0000	88101	PM2.5 - Local Conditions	41860	San Francisco-Oakland-Hayward, CA	06	California	001	Alameda	37.793624	-122.263376
03/18/2014	AQS	060010012	3	7.9	ug/m3 LC	33	Laney College	1	100.0000	88101	PM2.5 - Local Conditions	41860	San Francisco-Oakland-Hayward, CA	06	California	001	Alameda	37.793624	-122.263376
03/19/2014	AQS	060010012	3	10.5	ug/m3 LC	44	Laney College	1	100.0000	88101	PM2.5 - Local Conditions	41860	San Francisco-Oakland-Hayward, CA	06	California	001	Alameda	37.793624	-122.263376
03/20/2014	AQS	060010012	3	11.4	ug/m3 LC	48	Laney College	1	100.0000	88101	PM2.5 - Local Conditions	41860	San Francisco-Oakland-Hayward, CA	06	California	001	Alameda	37.793624	-122.263376
03/21/2014	AQS	060010012	3	13.9	ug/m3 LC	55	Laney College	1	100.0000	88101	PM2.5 - Local Conditions	41860	San Francisco-Oakland-Hayward, CA	06	California	001	Alameda	37.793624	-122.263376
03/22/2014	AQS	060010012	3	12.7	ug/m3 LC	52	Laney College	1	100.0000	88101	PM2.5 - Local Conditions	41860	San Francisco-Oakland-Hayward, CA	06	California	001	Alameda	37.793624	-122.263376
03/23/2014	AQS	060010012	3	11.1	ug/m3 LC	46	Laney College	1	100.0000	88101	PM2.5 - Local Conditions	41860	San Francisco-Oakland-Hayward, CA	06	California	001	Alameda	37.793624	-122.263376
03/24/2014	AQS	060010012	3	10.7	ug/m3 LC	45	Laney College	1	100.0000	88101	PM2.5 - Local Conditions	41860	San Francisco-Oakland-Hayward, CA	06	California	001	Alameda	37.793624	-122.263376
03/25/2014	AQS	060010012	3	6.2	ug/m3 LC	26	Laney College	1	100.0000	88101	PM2.5 - Local Conditions	41860	San Francisco-Oakland-Hayward, CA	06	California	001	Alameda	37.793624	-122.263376
03/26/2014	AQS	060010012	3	6	ug/m3 LC	25	Laney College	1	100.0000	88101	PM2.5 - Local Conditions	41860	San Francisco-Oakland-Hayward, CA	06	California	001	Alameda	37.793624	-122.263376
03/27/2014	AQS	060010012	3	8.3	ug/m3 LC	35	Laney College	1	100.0000	88101	PM2.5 - Local Conditions	41860	San Francisco-Oakland-Hayward, CA	06	California	001	Alameda	37.793624	-122.263376
03/28/2014	AQS	060010012	3	8.8	ug/m3 LC	37	Laney College	1	100.0000	88101	PM2.5 - Local Conditions	41860	San Francisco-Oakland-Hayward, CA	06	California	001	Alameda	37.793624	-122.263376
03/29/2014	AQS	060010012	3	4.4	ug/m3 LC	18	Laney College	1	100.0000	88101	PM2.5 - Local Conditions	41860	San Francisco-Oakland-Hayward, CA	06	California	001	Alameda	37.793624	-122.263376
03/30/2014	AQS	060010012	3	3.7	ug/m3 LC	15	Laney College	1	100.0000	88101	PM2.5 - Local Conditions	41860	San Francisco-Oakland-Hayward, CA	06	California	001	Alameda	37.793624	-122.263376
03/31/2014	AQS	060010012	3	5.2	ug/m3 LC	22	Laney College	1	100.0000	88101	PM2.5 - Local Conditions	41860	San Francisco-Oakland-Hayward, CA	06	California	001	Alameda	37.793624	-122.263376
04/01/2014	AQS	060010012	3	4.7	ug/m3 LC	20	Laney College	1	100.0000	88101	PM2.5 - Local Conditions	41860	San Francisco-Oakland-Hayward, CA	06	California	001	Alameda	37.793624	-122.263376
04/02/2014	AQS	060010012	3	2.3	ug/m3 LC	10	Laney College	1	100.0000	88101	PM2.5 - Local Conditions	41860	San Francisco-Oakland-Hayward, CA	06	California	001	Alameda	37.793624	-122.263376
04/03/2014	AQS	060010012	3	6.9	ug/m3 LC	29	Laney College	1	100.0000	88101	PM2.5 - Local Conditions	41860	San Francisco-Oakland-Hayward, CA	06	California	001	Alameda	37.793624	-122.263376
04/04/2014	AQS	060010012	3	4.4	ug/m3 LC	18	Laney College	1	100.0000	88101	PM2.5 - Local Conditions	41860	San Francisco-Oakland-Hayward, CA	06	California	001	Alameda	37.793624	-122.263376
04/05/2014	AQS	060010012	3	5.3	ug/m3 LC	22	Laney College	1	100.0000	88101	PM2.5 - Local Conditions	41860	San Francisco-Oakland-Hayward, CA	06	California	001	Alameda	37.793624	-122.263376
04/06/2014	AQS	060010012	3	9.7	ug/m3 LC	40	Laney College	1	100.0000	88101	PM2.5 - Local Conditions	41860	San Francisco-Oakland-Hayward, CA	06	California	001	Alameda	37.793624	-122.263376
04/07/2014	AQS	060010012	3	10.7	ug/m3 LC	45	Laney College	1	100.0000	88101	PM2.5 - Local Conditions	41860	San Francisco-Oakland-Hayward, CA	06	California	001	Alameda	37.793624	-122.263376
04/08/2014	AQS	060010012	3	9.9	ug/m3 LC	41	Laney College	1	100.0000	88101	PM2.5 - Local Conditions	41860	San Francisco-Oakland-Hayward, CA	06	California	001	Alameda	37.793624	-122.263376
04/09/2014	AQS	060010012	3	5.4	ug/m3 LC	23	Laney College	1	100.0000	88101	PM2.5 - Local Conditions	41860	San Francisco-Oakland-Hayward, CA	06	California	001	Alameda	37.793624	-122.263376
04/10/2014	AQS	060010012	3	8.2	ug/m3 LC	34	Laney College	1	100.0000	88101	PM2.5 - Local Conditions	41860	San Francisco-Oakland-Hayward, CA	06	California	001	Alameda	37.793624	-122.263376
04/11/2014	AQS	060010012	3	11.1	ug/m3 LC	46	Laney College	1	100.0000	88101	PM2.5 - Local Conditions	41860	San Francisco-Oakland-Hayward, CA	06	California	001	Alameda	37.793624	-122.263376
04/12/2014	AQS	060010012	3	9	ug/m3 LC	38	Laney College	1	100.0000	88101	PM2.5 - Local Conditions	41860	San Francisco-Oakland-Hayward, CA	06	California	001	Alameda	37.793624	-122.263376
04/13/2014	AQS	060010012	3	11.3	ug/m3 LC	47	Laney College	1	100.0000	88101	PM2.5 - Local Conditions	41860	San Francisco-Oakland-Hayward, CA	06	California	001	Alameda	37.793624	-122.263376
04/14/2014	AQS	060010012	3	13	ug/m3 LC	53	Laney College	1	100.0000	88101	PM2.5 - Local Conditions	41860	San Francisco-Oakland-Hayward, CA	06	California	001	Alameda	37.793624	-122.263376
04/15/2014	AQS	060010012	3	15.2	ug/m3 LC	58	Laney College	1	100.0000	88101	PM2.5 - Local Conditions	41860	San Francisco-Oakland-Hayward, CA	06	California	001	Alameda	37.793624	-122.263376
04/16/2014	AQS	060010012	3	16.5	ug/m3 LC	60	Laney College	1	100.0000	88101	PM2.5 - Local Conditions	41860	San Francisco-Oakland-Hayward, CA	06	California	001	Alameda	37.793624	-122.263376
04/17/2014	AQS	060010012	3	13.4	ug/m3 LC	54	Laney College	1	100.0000	88101	PM2.5 - Local Conditions	41860	San Francisco-Oakland-Hayward, CA	06	California	001	Alameda	37.793624	-122.263376
04/18/2014	AQS	060010012	3	9.6	ug/m3 LC	40	Laney College	1	100.0000	88101	PM2.5 - Local Conditions	41860	San Francisco-Oakland-Hayward, CA	06	California	001	Alameda	37.793624	-122.263376
04/19/2014	AQS	060010012	3	5.8	ug/m3 LC	24	Laney College	1	100.0000	88101	PM2.5 - Local Conditions	41860	San Francisco-Oakland-Hayward, CA	06	California	001	Alameda	37.793624	-122.263376
04/20/2014	AQS	060010012	3	10.3	ug/m3 LC	43	Laney College	1	100.0000	88101	PM2.5 - Local Conditions	41860	San Francisco-Oakland-Hayward, CA	06	California	001	Alameda	37.793624	-122.263376
04/21/2014	AQS	060010012	3	16.2	ug/m3 LC	60	Laney College	1	100.0000	88101	PM2.5 - Local Conditions	41860	San Francisco-Oakland-Hayward, CA	06	California	001	Alameda	37.793624	-122.263376
04/22/2014	AQS	060010012	3	4.3	ug/m3 LC	18	Laney College	1	100.0000	88101	PM2.5 - Local Conditions	41860	San Francisco-Oakland-Hayward, CA	06	California	001	Alameda	37.793624	-122.263376
04/23/2014	AQS	060010012	3	3.1	ug/m3 LC	13	Laney College	1	100.0000	88101	PM2.5 - Local Conditions	41860	San Francisco-Oakland-Hayward, CA	06	California	001	Alameda	37.793624	-122.263376
04/24/2014	AQS	060010012	3	7.1	ug/m3 LC	30	Laney College	1	100.0000	88101	PM2.5 - Local Conditions	41860	San Francisco-Oakland-Hayward, CA	06	California	001	Alameda	37.793624	-122.263376
04/25/2014	AQS	060010012	3	5.2	ug/m3 LC	22	Laney College	1	100.0000	88101	PM2.5 - Local Conditions	41860	San Francisco-Oakland-Hayward, CA	06	California	001	Alameda	37.793624	-122.263376
04/26/2014	AQS	060010012	3	3.2	ug/m3 LC	13	Laney College	1	100.0000	88101	PM2.5 - Local Conditions	41860	San Francisco-Oakland-Hayward, CA	06	California	001	Alameda	37.793624	-122.263376
04/27/2014	AQS	060010012	3	5.3	ug/m3 LC	22	Laney College	1	100.0000	88101	PM2.5 - Local Conditions	41860	San Francisco-Oakland-Hayward, CA	06	California	001	Alameda	37.793624	-122.263376
04/28/2014	AQS	060010012	3	10	ug/m3 LC	42	Laney College	1	100.0000	88101	PM2.5 - Local Conditions	41860	San Francisco-Oakland-Hayward, CA	06	California	001	Alameda	37.793624	-122.263376
04/29/2014	AQS	060010012	3	11.5	ug/m3 LC	48	Laney College	1	100.0000	88101	PM2.5 - Local Conditions	41860	San Francisco-Oakland-Hayward, CA	06	California	001	Alameda	37.793624	-122.263376
04/30/2014	AQS	060010012	3	15	ug/m3 LC	57	Laney College	1	100.0000	88101	PM2.5 - Local Conditions	41860	San Francisco-Oakland-Hayward, CA	06	California	001	Alameda	37.793624	-122.263376
05/01/2014	AQS	060010012	3	11.3	ug/m3 LC	47	Laney College	1	100.0000	88101	PM2.5 - Local Conditions	41860	San Francisco-Oakland-Hayward, CA	06	California	001	Alameda	37.793624	-122.263376
05/02/2014	AQS	060010012	3	8.7	ug/m3 LC	36	Laney College	1	100.0000	88101	PM2.5 - Local Conditions	41860	San Francisco-Oakland-Hayward, CA	06	California	001	Alameda	37.793624	-122.263376
05/03/2014	AQS	060010012	3	4	ug/m3 LC	17	Laney College	1	100.0000	88101	PM2.5 - Local Conditions	41860	San Francisco-Oakland-Hayward, CA	06	California	001	Alameda	37.793624	-122.263376
05/04/2014	AQS	060010012	3	3.5	ug/m3 LC	15	Laney College	1	100.0000	88101	PM2.5 - Local Conditions	41860	San Francisco-Oakland-Hayward, CA	06	California	001	Alameda	37.793624	-122.263376
05/05/2014	AQS	060010012	3	5.6	ug/m3 LC	23	Laney College	1	100.0000	88101	PM2.5 - Local Conditions	41860	San Francisco-Oakland-Hayward, CA	06	California	001	Alameda	37.793624	-122.263376
05/06/2014	AQS	060010012	3	7.7	ug/m3 LC	32	Laney College	1	100.0000	88101	PM2.5 - Local Conditions	41860	San Francisco-Oakland-Hayward, CA	06	California	001	Alameda	37.793624	-122.263376
05/07/2014	AQS	060010012	3	11.1	ug/m3 LC	46	Laney College	1	100.0000	88101	PM2.5 - Local Conditions	41860	San Francisco-Oakland-Hayward, CA	06	California	001	Alameda	37.793624	-122.263376
05/08/2014	AQS	060010012	3	6.7	ug/m3 LC	28	Laney College	1	100.0000	88101	PM2.5 - Local Conditions	41860	San Francisco-Oakland-Hayward, CA	06	California	001	Alameda	37.793624	-122.263376
05/09/2014	AQS	060010012	3	5.2	ug/m3 LC	22	Laney College	1	100.0000	88101	PM2.5 - Local Conditions	41860	San Francisco-Oakland-Hayward, CA	06	California	001	Alameda	37.793624	-122.263376
05/10/2014	AQS	060010012	3	3.1	ug/m3 LC	13	Laney College	1	100.0000	88101	PM2.5 - Local Conditions	41860	San Francisco-Oakland-Hayward, CA	06	California	001	Alameda	37.793624	-122.263376
05/11/2014	AQS	060010012	3	2.8	ug/m3 LC	12	Laney College	1	100.0000	88101	PM2.5 - Local Conditions	41860	San Francisco-Oakland-Hayward, CA	06	California	001	Alameda	37.793624	-122.263376
05/12/2014	AQS	060010012	3	9.2	ug/m3 LC	38	Laney College	1	100.0000	88101	PM2.5 - Local Conditions	41860	San Francisco-Oakland-Hayward, CA	06	California	001	Alameda	37.793624	-122.263376
05/13/2014	AQS	060010012	3	10.5	ug/m3 LC	44	Laney College	1	100.0000	88101	PM2.5 - Local Conditions	41860	San Francisco-Oakland-Hayward, CA	06	California	001	Alameda	37.793624	-122.263376
05/14/2014	AQS	060010012	3	11.5	ug/m3 LC	48	Laney College	1	100.0000	88101	PM2.5 - Local Conditions	41860	San Francisco-Oakland-Hayward, CA	06	California	001	Alameda	37.793624	-122.263376
05/15/2014	AQS	060010012	3	12	ug/m3 LC	50	Laney College	1	100.0000	88101	PM2.5 - Local Conditions	41860	San Francisco-Oakland-Hayward, CA	06	California	001	Alameda	37.793624	-122.263376
05/16/2014	AQS	060010012	3	9.9	ug/m3 LC	41	Laney College	1	100.0000	88101	PM2.5 - Local Conditions	41860	San Francisco-Oakland-Hayward, CA	06	California	001	Alameda	37.793624	-122.263376
05/17/2014	AQS	060010012	3	7.7	ug/m3 LC	32	Laney College	1	100.0000	88101	PM2.5 - Local Conditions	41860	San Francisco-Oakland-Hayward, CA	06	California	001	Alameda	37.793624	-122.263376
05/18/2014	AQS	060010012	3	6.2	ug/m3 LC	26	Laney College	1	100.0000	88101	PM2.5 - Local Conditions	41860	San Francisco-Oakland-Hayward, CA	06	California	001	Alameda	37.793624	-122.263376
05/19/2014	AQS	060010012	3	4.9	ug/m3 LC	20	Laney College	1	100.0000	88101	PM2.5 - Local Conditions	41860	San Francisco-Oakland-Hayward, CA	06	California	001	Alameda	37.793624	-122.263376
05/20/2014	AQS	060010012	3	6	ug/m3 LC	25	Laney College	1	100.0000	88101	PM2.5 - Local Conditions	41860	San Francisco-Oakland-Hayward, CA	06	California	001	Alameda	37.793624	-122.263376
05/21/2014	AQS	060010012	3	11.3	ug/m3 LC	47	Laney College	1	100.0000	88101	PM2.5 - Local Conditions	41860	San Francisco-Oakland-Hayward, CA	06	California	001	Alameda	37.793624	-122.263376
05/22/2014	AQS	060010012	3	7.5	ug/m3 LC	31	Laney College	1	100.0000	88101	PM2.5 - Local Conditions	41860	San Francisco-Oakland-Hayward, CA	06	California	001	Alameda	37.793624	-122.263376
05/23/2014	AQS	060010012	3	5.9	ug/m3 LC	25	Laney College	1	100.0000	88101	PM2.5 - Local Conditions	41860	San Francisco-Oakland-Hayward, CA	06	California	001	Alameda	37.793624	-122.263376
05/24/2014	AQS	060010012	3	8.6	ug/m3 LC	36	Laney College	1	100.0000	88101	PM2.5 - Local Conditions	41860	San Francisco-Oakland-Hayward, CA	06	California	001	Alameda	37.793624	-122.263376
05/25/2014	AQS	060010012	3	11.5	ug/m3 LC	48	Laney College	1	100.0000	88101	PM2.5 - Local Conditions	41860	San Francisco-Oakland-Hayward, CA	06	California	001	Alameda	37.793624	-122.263376
05/26/2014	AQS	060010012	3	8.3	ug/m3 LC	35	Laney College	1	100.0000	88101	PM2.5 - Local Conditions	41860	San Francisco-Oakland-Hayward, CA	06	California	001	Alameda	37.793624	-122.263376
05/27/2014	AQS	060010012	3	12.7	ug/m3 LC	52	Laney College	1	100.0000	88101	PM2.5 - Local Conditions	41860	San Francisco-Oakland-Hayward, CA	06	California	001	Alameda	37.793624	-122.263376
05/28/2014	AQS	060010012	3	7.7	ug/m3 LC	32	Laney College	1	100.0000	88101	PM2.5 - Local Conditions	41860	San Francisco-Oakland-Hayward, CA	06	California	001	Alameda	37.793624	-122.263376
05/29/2014	AQS	060010012	3	12.7	ug/m3 LC	52	Laney College	1	100.0000	88101	PM2.5 - Local Conditions	41860	San Francisco-Oakland-Hayward, CA	06	California	001	Alameda	37.793624	-122.263376
05/30/2014	AQS	060010012	3	15.8	ug/m3 LC	59	Laney College	1	100.0000	88101	PM2.5 - Local Conditions	41860	San Francisco-Oakland-Hayward, CA	06	California	001	Alameda	37.793624	-122.263376
05/31/2014	AQS	060010012	3	7.5	ug/m3 LC	31	Laney College	1	100.0000	88101	PM2.5 - Local Conditions	41860	San Francisco-Oakland-Hayward, CA	06	California	001	Alameda	37.793624	-122.263376
06/01/2014	AQS	060010012	3	10.5	ug/m3 LC	44	Laney College	1	100.0000	88101	PM2.5 - Local Conditions	41860	San Francisco-Oakland-Hayward, CA	06	California	001	Alameda	37.793624	-122.263376
06/02/2014	AQS	060010012	3	5.9	ug/m3 LC	25	Laney College	1	100.0000	88101	PM2.5 - Local Conditions	41860	San Francisco-Oakland-Hayward, CA	06	California	001	Alameda	37.793624	-122.263376
06/03/2014	AQS	060010012	3	6.6	ug/m3 LC	28	Laney College	1	100.0000	88101	PM2.5 - Local Conditions	41860	San Francisco-Oakland-Hayward, CA	06	California	001	Alameda	37.793624	-122.263376
06/04/2014	AQS	060010012	3	12.2	ug/m3 LC	51	Laney College	1	100.0000	88101	PM2.5 - Local Conditions	41860	San Francisco-Oakland-Hayward, CA	06	California	001	Alameda	37.793624	-122.263376
06/05/2014	AQS	060010012	3	16.1	ug/m3 LC	59	Laney College	1	100.0000	88101	PM2.5 - Local Conditions	41860	San Francisco-Oakland-Hayward, CA	06	California	001	Alameda	37.793624	-122.263376
06/06/2014	AQS	060010012	3	10.7	ug/m3 LC	45	Laney College	1	100.0000	88101	PM2.5 - Local Conditions	41860	San Francisco-Oakland-Hayward, CA	06	California	001	Alameda	37.793624	-122.263376
06/07/2014	AQS	060010012	3	16	ug/m3 LC	59	Laney College	1	100.0000	88101	PM2.5 - Local Conditions	41860	San Francisco-Oakland-Hayward, CA	06	California	001	Alameda	37.793624	-122.263376
06/08/2014	AQS	060010012	3	14.3	ug/m3 LC	56	Laney College	1	100.0000	88101	PM2.5 - Local Conditions	41860	San Francisco-Oakland-Hayward, CA	06	California	001	Alameda	37.793624	-122.263376
06/09/2014	AQS	060010012	3	16.6	ug/m3 LC	60	Laney College	1	100.0000	88101	PM2.5 - Local Conditions	41860	San Francisco-Oakland-Hayward, CA	06	California	001	Alameda	37.793624	-122.263376
06/10/2014	AQS	060010012	3	6.3	ug/m3 LC	26	Laney College	1	100.0000	88101	PM2.5 - Local Conditions	41860	San Francisco-Oakland-Hayward, CA	06	California	001	Alameda	37.793624	-122.263376
06/11/2014	AQS	060010012	3	9.2	ug/m3 LC	38	Laney College	1	100.0000	88101	PM2.5 - Local Conditions	41860	San Francisco-Oakland-Hayward, CA	06	California	001	Alameda	37.793624	-122.263376
06/12/2014	AQS	060010012	3	7	ug/m3 LC	29	Laney College	1	100.0000	88101	PM2.5 - Local Conditions	41860	San Francisco-Oakland-Hayward, CA	06	California	001	Alameda	37.793624	-122.263376
06/13/2014	AQS	060010012	3	11.7	ug/m3 LC	49	Laney College	1	100.0000	88101	PM2.5 - Local Conditions	41860	San Francisco-Oakland-Hayward, CA	06	California	001	Alameda	37.793624	-122.263376
06/14/2014	AQS	060010012	3	14.5	ug/m3 LC	56	Laney College	1	100.0000	88101	PM2.5 - Local Conditions	41860	San Francisco-Oakland-Hayward, CA	06	California	001	Alameda	37.793624	-122.263376
06/15/2014	AQS	060010012	3	13.9	ug/m3 LC	55	Laney College	1	100.0000	88101	PM2.5 - Local Conditions	41860	San Francisco-Oakland-Hayward, CA	06	California	001	Alameda	37.793624	-122.263376
06/16/2014	AQS	060010012	3	11.5	ug/m3 LC	48	Laney College	1	100.0000	88101	PM2.5 - Local Conditions	41860	San Francisco-Oakland-Hayward, CA	06	California	001	Alameda	37.793624	-122.263376
06/17/2014	AQS	060010012	3	11	ug/m3 LC	46	Laney College	1	100.0000	88101	PM2.5 - Local Conditions	41860	San Francisco-Oakland-Hayward, CA	06	California	001	Alameda	37.793624	-122.263376
06/18/2014	AQS	060010012	3	14.1	ug/m3 LC	55	Laney College	1	100.0000	88101	PM2.5 - Local Conditions	41860	San Francisco-Oakland-Hayward, CA	06	California	001	Alameda	37.793624	-122.263376
06/19/2014	AQS	060010012	3	10.9	ug/m3 LC	45	Laney College	1	100.0000	88101	PM2.5 - Local Conditions	41860	San Francisco-Oakland-Hayward, CA	06	California	001	Alameda	37.793624	-122.263376
06/20/2014	AQS	060010012	3	11.2	ug/m3 LC	47	Laney College	1	100.0000	88101	PM2.5 - Local Conditions	41860	San Francisco-Oakland-Hayward, CA	06	California	001	Alameda	37.793624	-122.263376
06/21/2014	AQS	060010012	3	12.1	ug/m3 LC	51	Laney College	1	100.0000	88101	PM2.5 - Local Conditions	41860	San Francisco-Oakland-Hayward, CA	06	California	001	Alameda	37.793624	-122.263376
06/22/2014	AQS	060010012	3	11.6	ug/m3 LC	48	Laney College	1	100.0000	88101	PM2.5 - Local Conditions	41860	San Francisco-Oakland-Hayward, CA	06	California	001	Alameda	37.793624	-122.263376
06/23/2014	AQS	060010012	3	12.7	ug/m3 LC	52	Laney College	1	100.0000	88101	PM2.5 - Local Conditions	41860	San Francisco-Oakland-Hayward, CA	06	California	001	Alameda	37.793624	-122.263376
06/24/2014	AQS	060010012	3	10.6	ug/m3 LC	44	Laney College	1	100.0000	88101	PM2.5 - Local Conditions	41860	San Francisco-Oakland-Hayward, CA	06	California	001	Alameda	37.793624	-122.263376
06/25/2014	AQS	060010012	3	4.5	ug/m3 LC	19	Laney College	1	100.0000	88101	PM2.5 - Local Conditions	41860	San Francisco-Oakland-Hayward, CA	06	California	001	Alameda	37.793624	-122.263376
06/26/2014	AQS	060010012	3	7.2	ug/m3 LC	30	Laney College	1	100.0000	88101	PM2.5 - Local Conditions	41860	San Francisco-Oakland-Hayward, CA	06	California	001	Alameda	37.793624	-122.263376
06/27/2014	AQS	060010012	3	4.2	ug/m3 LC	18	Laney College	1	100.0000	88101	PM2.5 - Local Conditions	41860	San Francisco-Oakland-Hayward, CA	06	California	001	Alameda	37.793624	-122.263376
06/28/2014	AQS	060010012	3	6.3	ug/m3 LC	26	Laney College	1	100.0000	88101	PM2.5 - Local Conditions	41860	San Francisco-Oakland-Hayward, CA	06	California	001	Alameda	37.793624	-122.263376
06/29/2014	AQS	060010012	3	11.1	ug/m3 LC	46	Laney College	1	100.0000	88101	PM2.5 - Local Conditions	41860	San Francisco-Oakland-Hayward, CA	06	California	001	Alameda	37.793624	-122.263376
06/30/2014	AQS	060010012	3	16.5	ug/m3 LC	60	Laney College	1	100.0000	88101	PM2.5 - Local Conditions	41860	San Francisco-Oakland-Hayward, CA	06	California	001	Alameda	37.793624	-122.263376
07/01/2014	AQS	060010012	3	6.7	ug/m3 LC	28	Laney College	1	100.0000	88101	PM2.5 - Local Conditions	41860	San Francisco-Oakland-Hayward, CA	06	California	001	Alameda	37.793624	-122.263376
07/02/2014	AQS	060010012	3	6.6	ug/m3 LC	28	Laney College	1	100.0000	88101	PM2.5 - Local Conditions	41860	San Francisco-Oakland-Hayward, CA	06	California	001	Alameda	37.793624	-122.263376
07/03/2014	AQS	060010012	3	10.7	ug/m3 LC	45	Laney College	1	100.0000	88101	PM2.5 - Local Conditions	41860	San Francisco-Oakland-Hayward, CA	06	California	001	Alameda	37.793624	-122.263376
07/04/2014	AQS	060010012	3	9.5	ug/m3 LC	40	Laney College	1	100.0000	88101	PM2.5 - Local Conditions	41860	San Francisco-Oakland-Hayward, CA	06	California	001	Alameda	37.793624	-122.263376
07/05/2014	AQS	060010012	3	7.7	ug/m3 LC	32	Laney College	1	100.0000	88101	PM2.5 - Local Conditions	41860	San Francisco-Oakland-Hayward, CA	06	California	001	Alameda	37.793624	-122.263376
07/06/2014	AQS	060010012	3	5.6	ug/m3 LC	23	Laney College	1	100.0000	88101	PM2.5 - Local Conditions	41860	San Francisco-Oakland-Hayward, CA	06	California	001	Alameda	37.793624	-122.263376
07/07/2014	AQS	060010012	3	4.9	ug/m3 LC	20	Laney College	1	100.0000	88101	PM2.5 - Local Conditions	41860	San Francisco-Oakland-Hayward, CA	06	California	001	Alameda	37.793624	-122.263376
07/08/2014	AQS	060010012	3	4.5	ug/m3 LC	19	Laney College	1	100.0000	88101	PM2.5 - Local Conditions	41860	San Francisco-Oakland-Hayward, CA	06	California	001	Alameda	37.793624	-122.263376
07/09/2014	AQS	060010012	3	11.2	ug/m3 LC	47	Laney College	1	100.0000	88101	PM2.5 - Local Conditions	41860	San Francisco-Oakland-Hayward, CA	06	California	001	Alameda	37.793624	-122.263376
07/10/2014	AQS	060010012	3	6.2	ug/m3 LC	26	Laney College	1	100.0000	88101	PM2.5 - Local Conditions	41860	San Francisco-Oakland-Hayward, CA	06	California	001	Alameda	37.793624	-122.263376
07/11/2014	AQS	060010012	3	23.8	ug/m3 LC	76	Laney College	1	100.0000	88101	PM2.5 - Local Conditions	41860	San Francisco-Oakland-Hayward, CA	06	California	001	Alameda	37.793624	-122.263376
07/12/2014	AQS	060010012	3	3.7	ug/m3 LC	15	Laney College	1	100.0000	88101	PM2.5 - Local Conditions	41860	San Francisco-Oakland-Hayward, CA	06	California	001	Alameda	37.793624	-122.263376
07/13/2014	AQS	060010012	3	4.9	ug/m3 LC	20	Laney College	1	100.0000	88101	PM2.5 - Local Conditions	41860	San Francisco-Oakland-Hayward, CA	06	California	001	Alameda	37.793624	-122.263376
07/14/2014	AQS	060010012	3	19.9	ug/m3 LC	67	Laney College	1	100.0000	88101	PM2.5 - Local Conditions	41860	San Francisco-Oakland-Hayward, CA	06	California	001	Alameda	37.793624	-122.263376
07/15/2014	AQS	060010012	3	9.2	ug/m3 LC	38	Laney College	1	100.0000	88101	PM2.5 - Local Conditions	41860	San Francisco-Oakland-Hayward, CA	06	California	001	Alameda	37.793624	-122.263376
07/16/2014	AQS	060010012	3	6.2	ug/m3 LC	26	Laney College	1	100.0000	88101	PM2.5 - Local Conditions	41860	San Francisco-Oakland-Hayward, CA	06	California	001	Alameda	37.793624	-122.263376
07/17/2014	AQS	060010012	3	3.8	ug/m3 LC	16	Laney College	1	100.0000	88101	PM2.5 - Local Conditions	41860	San Francisco-Oakland-Hayward, CA	06	California	001	Alameda	37.793624	-122.263376
07/18/2014	AQS	060010012	3	2.5	ug/m3 LC	10	Laney College	1	100.0000	88101	PM2.5 - Local Conditions	41860	San Francisco-Oakland-Hayward, CA	06	California	001	Alameda	37.793624	-122.263376
07/19/2014	AQS	060010012	3	2.9	ug/m3 LC	12	Laney College	1	100.0000	88101	PM2.5 - Local Conditions	41860	San Francisco-Oakland-Hayward, CA	06	California	001	Alameda	37.793624	-122.263376
07/20/2014	AQS	060010012	3	1.6	ug/m3 LC	7	Laney College	1	100.0000	88101	PM2.5 - Local Conditions	41860	San Francisco-Oakland-Hayward, CA	06	California	001	Alameda	37.793624	-122.263376
07/21/2014	AQS	060010012	3	2.7	ug/m3 LC	11	Laney College	1	100.0000	88101	PM2.5 - Local Conditions	41860	San Francisco-Oakland-Hayward, CA	06	California	001	Alameda	37.793624	-122.263376
07/22/2014	AQS	060010012	3	2.6	ug/m3 LC	11	Laney College	1	100.0000	88101	PM2.5 - Local Conditions	41860	San Francisco-Oakland-Hayward, CA	06	California	001	Alameda	37.793624	-122.263376
07/23/2014	AQS	060010012	3	7.7	ug/m3 LC	32	Laney College	1	100.0000	88101	PM2.5 - Local Conditions	41860	San Francisco-Oakland-Hayward, CA	06	California	001	Alameda	37.793624	-122.263376
07/24/2014	AQS	060010012	3	8.7	ug/m3 LC	36	Laney College	1	100.0000	88101	PM2.5 - Local Conditions	41860	San Francisco-Oakland-Hayward, CA	06	California	001	Alameda	37.793624	-122.263376
07/25/2014	AQS	060010012	3	14.6	ug/m3 LC	56	Laney College	1	100.0000	88101	PM2.5 - Local Conditions	41860	San Francisco-Oakland-Hayward, CA	06	California	001	Alameda	37.793624	-122.263376
07/26/2014	AQS	060010012	3	12.8	ug/m3 LC	52	Laney College	1	100.0000	88101	PM2.5 - Local Conditions	41860	San Francisco-Oakland-Hayward, CA	06	California	001	Alameda	37.793624	-122.263376
07/27/2014	AQS	060010012	3	11.1	ug/m3 LC	46	Laney College	1	100.0000	88101	PM2.5 - Local Conditions	41860	San Francisco-Oakland-Hayward, CA	06	California	001	Alameda	37.793624	-122.263376
07/28/2014	AQS	060010012	3	7.7	ug/m3 LC	32	Laney College	1	100.0000	88101	PM2.5 - Local Conditions	41860	San Francisco-Oakland-Hayward, CA	06	California	001	Alameda	37.793624	-122.263376
07/29/2014	AQS	060010012	3	7	ug/m3 LC	29	Laney College	1	100.0000	88101	PM2.5 - Local Conditions	41860	San Francisco-Oakland-Hayward, CA	06	California	001	Alameda	37.793624	-122.263376
07/30/2014	AQS	060010012	3	7.1	ug/m3 LC	30	Laney College	1	100.0000	88101	PM2.5 - Local Conditions	41860	San Francisco-Oakland-Hayward, CA	06	California	001	Alameda	37.793624	-122.263376
07/31/2014	AQS	060010012	3	8.7	ug/m3 LC	36	Laney College	1	100.0000	88101	PM2.5 - Local Conditions	41860	San Francisco-Oakland-Hayward, CA	06	California	001	Alameda	37.793624	-122.263376
08/01/2014	AQS	060010012	3	12.5	ug/m3 LC	52	Laney College	1	100.0000	88101	PM2.5 - Local Conditions	41860	San Francisco-Oakland-Hayward, CA	06	California	001	Alameda	37.793624	-122.263376
08/02/2014	AQS	060010012	3	8.2	ug/m3 LC	34	Laney College	1	100.0000	88101	PM2.5 - Local Conditions	41860	San Francisco-Oakland-Hayward, CA	06	California	001	Alameda	37.793624	-122.263376
08/03/2014	AQS	060010012	3	6.2	ug/m3 LC	26	Laney College	1	100.0000	88101	PM2.5 - Local Conditions	41860	San Francisco-Oakland-Hayward, CA	06	California	001	Alameda	37.793624	-122.263376
08/04/2014	AQS	060010012	3	4.6	ug/m3 LC	19	Laney College	1	100.0000	88101	PM2.5 - Local Conditions	41860	San Francisco-Oakland-Hayward, CA	06	California	001	Alameda	37.793624	-122.263376
08/05/2014	AQS	060010012	3	6.8	ug/m3 LC	28	Laney College	1	100.0000	88101	PM2.5 - Local Conditions	41860	San Francisco-Oakland-Hayward, CA	06	California	001	Alameda	37.793624	-122.263376
08/06/2014	AQS	060010012	3	9.4	ug/m3 LC	39	Laney College	1	100.0000	88101	PM2.5 - Local Conditions	41860	San Francisco-Oakland-Hayward, CA	06	California	001	Alameda	37.793624	-122.263376
08/07/2014	AQS	060010012	3	9.9	ug/m3 LC	41	Laney College	1	100.0000	88101	PM2.5 - Local Conditions	41860	San Francisco-Oakland-Hayward, CA	06	California	001	Alameda	37.793624	-122.263376
08/08/2014	AQS	060010012	3	16.1	ug/m3 LC	59	Laney College	1	100.0000	88101	PM2.5 - Local Conditions	41860	San Francisco-Oakland-Hayward, CA	06	California	001	Alameda	37.793624	-122.263376
08/09/2014	AQS	060010012	3	9.7	ug/m3 LC	40	Laney College	1	100.0000	88101	PM2.5 - Local Conditions	41860	San Francisco-Oakland-Hayward, CA	06	California	001	Alameda	37.793624	-122.263376
08/10/2014	AQS	060010012	3	4	ug/m3 LC	17	Laney College	1	100.0000	88101	PM2.5 - Local Conditions	41860	San Francisco-Oakland-Hayward, CA	06	California	001	Alameda	37.793624	-122.263376
08/11/2014	AQS	060010012	3	8.8	ug/m3 LC	37	Laney College	1	100.0000	88101	PM2.5 - Local Conditions	41860	San Francisco-Oakland-Hayward, CA	06	California	001	Alameda	37.793624	-122.263376
08/12/2014	AQS	060010012	3	8.1	ug/m3 LC	34	Laney College	1	100.0000	88101	PM2.5 - Local Conditions	41860	San Francisco-Oakland-Hayward, CA	06	California	001	Alameda	37.793624	-122.263376
08/13/2014	AQS	060010012	3	10.1	ug/m3 LC	42	Laney College	1	100.0000	88101	PM2.5 - Local Conditions	41860	San Francisco-Oakland-Hayward, CA	06	California	001	Alameda	37.793624	-122.263376
08/14/2014	AQS	060010012	3	5.5	ug/m3 LC	23	Laney College	1	100.0000	88101	PM2.5 - Local Conditions	41860	San Francisco-Oakland-Hayward, CA	06	California	001	Alameda	37.793624	-122.263376
08/15/2014	AQS	060010012	3	6.9	ug/m3 LC	29	Laney College	1	100.0000	88101	PM2.5 - Local Conditions	41860	San Francisco-Oakland-Hayward, CA	06	California	001	Alameda	37.793624	-122.263376
08/16/2014	AQS	060010012	3	7.9	ug/m3 LC	33	Laney College	1	100.0000	88101	PM2.5 - Local Conditions	41860	San Francisco-Oakland-Hayward, CA	06	California	001	Alameda	37.793624	-122.263376
08/17/2014	AQS	060010012	3	5	ug/m3 LC	21	Laney College	1	100.0000	88101	PM2.5 - Local Conditions	41860	San Francisco-Oakland-Hayward, CA	06	California	001	Alameda	37.793624	-122.263376
08/18/2014	AQS	060010012	3	5.4	ug/m3 LC	23	Laney College	1	100.0000	88101	PM2.5 - Local Conditions	41860	San Francisco-Oakland-Hayward, CA	06	California	001	Alameda	37.793624	-122.263376
08/19/2014	AQS	060010012	3	4.6	ug/m3 LC	19	Laney College	1	100.0000	88101	PM2.5 - Local Conditions	41860	San Francisco-Oakland-Hayward, CA	06	California	001	Alameda	37.793624	-122.263376
08/20/2014	AQS	060010012	3	4.2	ug/m3 LC	18	Laney College	1	100.0000	88101	PM2.5 - Local Conditions	41860	San Francisco-Oakland-Hayward, CA	06	California	001	Alameda	37.793624	-122.263376
08/21/2014	AQS	060010012	3	5.9	ug/m3 LC	25	Laney College	1	100.0000	88101	PM2.5 - Local Conditions	41860	San Francisco-Oakland-Hayward, CA	06	California	001	Alameda	37.793624	-122.263376
08/22/2014	AQS	060010012	3	5.9	ug/m3 LC	25	Laney College	1	100.0000	88101	PM2.5 - Local Conditions	41860	San Francisco-Oakland-Hayward, CA	06	California	001	Alameda	37.793624	-122.263376
08/23/2014	AQS	060010012	3	4.7	ug/m3 LC	20	Laney College	1	100.0000	88101	PM2.5 - Local Conditions	41860	San Francisco-Oakland-Hayward, CA	06	California	001	Alameda	37.793624	-122.263376
08/24/2014	AQS	060010012	3	3.7	ug/m3 LC	15	Laney College	1	100.0000	88101	PM2.5 - Local Conditions	41860	San Francisco-Oakland-Hayward, CA	06	California	001	Alameda	37.793624	-122.263376
08/25/2014	AQS	060010012	3	6.2	ug/m3 LC	26	Laney College	1	100.0000	88101	PM2.5 - Local Conditions	41860	San Francisco-Oakland-Hayward, CA	06	California	001	Alameda	37.793624	-122.263376
08/26/2014	AQS	060010012	3	6.7	ug/m3 LC	28	Laney College	1	100.0000	88101	PM2.5 - Local Conditions	41860	San Francisco-Oakland-Hayward, CA	06	California	001	Alameda	37.793624	-122.263376
08/27/2014	AQS	060010012	3	8.5	ug/m3 LC	35	Laney College	1	100.0000	88101	PM2.5 - Local Conditions	41860	San Francisco-Oakland-Hayward, CA	06	California	001	Alameda	37.793624	-122.263376
08/28/2014	AQS	060010012	3	7.6	ug/m3 LC	32	Laney College	1	100.0000	88101	PM2.5 - Local Conditions	41860	San Francisco-Oakland-Hayward, CA	06	California	001	Alameda	37.793624	-122.263376
08/29/2014	AQS	060010012	3	6	ug/m3 LC	25	Laney College	1	100.0000	88101	PM2.5 - Local Conditions	41860	San Francisco-Oakland-Hayward, CA	06	California	001	Alameda	37.793624	-122.263376
08/30/2014	AQS	060010012	3	6.7	ug/m3 LC	28	Laney College	1	100.0000	88101	PM2.5 - Local Conditions	41860	San Francisco-Oakland-Hayward, CA	06	California	001	Alameda	37.793624	-122.263376
08/31/2014	AQS	060010012	3	7.5	ug/m3 LC	31	Laney College	1	100.0000	88101	PM2.5 - Local Conditions	41860	San Francisco-Oakland-Hayward, CA	06	California	001	Alameda	37.793624	-122.263376
09/01/2014	AQS	060010012	3	12.2	ug/m3 LC	51	Laney College	1	100.0000	88101	PM2.5 - Local Conditions	41860	San Francisco-Oakland-Hayward, CA	06	California	001	Alameda	37.793624	-122.263376
09/02/2014	AQS	060010012	3	7.4	ug/m3 LC	31	Laney College	1	100.0000	88101	PM2.5 - Local Conditions	41860	San Francisco-Oakland-Hayward, CA	06	California	001	Alameda	37.793624	-122.263376
09/03/2014	AQS	060010012	3	9.9	ug/m3 LC	41	Laney College	1	100.0000	88101	PM2.5 - Local Conditions	41860	San Francisco-Oakland-Hayward, CA	06	California	001	Alameda	37.793624	-122.263376
09/04/2014	AQS	060010012	3	12.6	ug/m3 LC	52	Laney College	1	100.0000	88101	PM2.5 - Local Conditions	41860	San Francisco-Oakland-Hayward, CA	06	California	001	Alameda	37.793624	-122.263376
09/05/2014	AQS	060010012	3	20.2	ug/m3 LC	68	Laney College	1	100.0000	88101	PM2.5 - Local Conditions	41860	San Francisco-Oakland-Hayward, CA	06	California	001	Alameda	37.793624	-122.263376
09/06/2014	AQS	060010012	3	20.6	ug/m3 LC	69	Laney College	1	100.0000	88101	PM2.5 - Local Conditions	41860	San Francisco-Oakland-Hayward, CA	06	California	001	Alameda	37.793624	-122.263376
09/07/2014	AQS	060010012	3	12.9	ug/m3 LC	53	Laney College	1	100.0000	88101	PM2.5 - Local Conditions	41860	San Francisco-Oakland-Hayward, CA	06	California	001	Alameda	37.793624	-122.263376
09/08/2014	AQS	060010012	3	12	ug/m3 LC	50	Laney College	1	100.0000	88101	PM2.5 - Local Conditions	41860	San Francisco-Oakland-Hayward, CA	06	California	001	Alameda	37.793624	-122.263376
09/09/2014	AQS	060010012	3	10.2	ug/m3 LC	43	Laney College	1	100.0000	88101	PM2.5 - Local Conditions	41860	San Francisco-Oakland-Hayward, CA	06	California	001	Alameda	37.793624	-122.263376
09/10/2014	AQS	060010012	3	12.1	ug/m3 LC	51	Laney College	1	100.0000	88101	PM2.5 - Local Conditions	41860	San Francisco-Oakland-Hayward, CA	06	California	001	Alameda	37.793624	-122.263376
09/11/2014	AQS	060010012	3	12.2	ug/m3 LC	51	Laney College	1	100.0000	88101	PM2.5 - Local Conditions	41860	San Francisco-Oakland-Hayward, CA	06	California	001	Alameda	37.793624	-122.263376
09/12/2014	AQS	060010012	3	11	ug/m3 LC	46	Laney College	1	100.0000	88101	PM2.5 - Local Conditions	41860	San Francisco-Oakland-Hayward, CA	06	California	001	Alameda	37.793624	-122.263376
09/13/2014	AQS	060010012	3	9.2	ug/m3 LC	38	Laney College	1	100.0000	88101	PM2.5 - Local Conditions	41860	San Francisco-Oakland-Hayward, CA	06	California	001	Alameda	37.793624	-122.263376
09/14/2014	AQS	060010012	3	10.6	ug/m3 LC	44	Laney College	1	100.0000	88101	PM2.5 - Local Conditions	41860	San Francisco-Oakland-Hayward, CA	06	California	001	Alameda	37.793624	-122.263376
09/15/2014	AQS	060010012	3	8.9	ug/m3 LC	37	Laney College	1	100.0000	88101	PM2.5 - Local Conditions	41860	San Francisco-Oakland-Hayward, CA	06	California	001	Alameda	37.793624	-122.263376
09/16/2014	AQS	060010012	3	8.7	ug/m3 LC	36	Laney College	1	100.0000	88101	PM2.5 - Local Conditions	41860	San Francisco-Oakland-Hayward, CA	06	California	001	Alameda	37.793624	-122.263376
09/17/2014	AQS	060010012	3	5.8	ug/m3 LC	24	Laney College	1	100.0000	88101	PM2.5 - Local Conditions	41860	San Francisco-Oakland-Hayward, CA	06	California	001	Alameda	37.793624	-122.263376
09/18/2014	AQS	060010012	3	4.9	ug/m3 LC	20	Laney College	1	100.0000	88101	PM2.5 - Local Conditions	41860	San Francisco-Oakland-Hayward, CA	06	California	001	Alameda	37.793624	-122.263376
09/19/2014	AQS	060010012	3	7.8	ug/m3 LC	33	Laney College	1	100.0000	88101	PM2.5 - Local Conditions	41860	San Francisco-Oakland-Hayward, CA	06	California	001	Alameda	37.793624	-122.263376
09/20/2014	AQS	060010012	3	4.2	ug/m3 LC	18	Laney College	1	100.0000	88101	PM2.5 - Local Conditions	41860	San Francisco-Oakland-Hayward, CA	06	California	001	Alameda	37.793624	-122.263376
09/21/2014	AQS	060010012	3	3.4	ug/m3 LC	14	Laney College	1	100.0000	88101	PM2.5 - Local Conditions	41860	San Francisco-Oakland-Hayward, CA	06	California	001	Alameda	37.793624	-122.263376
09/22/2014	AQS	060010012	3	6.7	ug/m3 LC	28	Laney College	1	100.0000	88101	PM2.5 - Local Conditions	41860	San Francisco-Oakland-Hayward, CA	06	California	001	Alameda	37.793624	-122.263376
09/23/2014	AQS	060010012	3	4.3	ug/m3 LC	18	Laney College	1	100.0000	88101	PM2.5 - Local Conditions	41860	San Francisco-Oakland-Hayward, CA	06	California	001	Alameda	37.793624	-122.263376
09/24/2014	AQS	060010012	3	2	ug/m3 LC	8	Laney College	1	100.0000	88101	PM2.5 - Local Conditions	41860	San Francisco-Oakland-Hayward, CA	06	California	001	Alameda	37.793624	-122.263376
09/25/2014	AQS	060010012	3	3.8	ug/m3 LC	16	Laney College	1	100.0000	88101	PM2.5 - Local Conditions	41860	San Francisco-Oakland-Hayward, CA	06	California	001	Alameda	37.793624	-122.263376
09/26/2014	AQS	060010012	3	5.9	ug/m3 LC	25	Laney College	1	100.0000	88101	PM2.5 - Local Conditions	41860	San Francisco-Oakland-Hayward, CA	06	California	001	Alameda	37.793624	-122.263376
09/27/2014	AQS	060010012	3	7.8	ug/m3 LC	33	Laney College	1	100.0000	88101	PM2.5 - Local Conditions	41860	San Francisco-Oakland-Hayward, CA	06	California	001	Alameda	37.793624	-122.263376
09/28/2014	AQS	060010012	3	9.5	ug/m3 LC	40	Laney College	1	100.0000	88101	PM2.5 - Local Conditions	41860	San Francisco-Oakland-Hayward, CA	06	California	001	Alameda	37.793624	-122.263376
09/29/2014	AQS	060010012	3	10	ug/m3 LC	42	Laney College	1	100.0000	88101	PM2.5 - Local Conditions	41860	San Francisco-Oakland-Hayward, CA	06	California	001	Alameda	37.793624	-122.263376
09/30/2014	AQS	060010012	3	7.1	ug/m3 LC	30	Laney College	1	100.0000	88101	PM2.5 - Local Conditions	41860	San Francisco-Oakland-Hayward, CA	06	California	001	Alameda	37.793624	-122.263376
10/01/2014	AQS	060010012	3	9.1	ug/m3 LC	38	Laney College	1	100.0000	88101	PM2.5 - Local Conditions	41860	San Francisco-Oakland-Hayward, CA	06	California	001	Alameda	37.793624	-122.263376
10/02/2014	AQS	060010012	3	8.4	ug/m3 LC	35	Laney College	1	100.0000	88101	PM2.5 - Local Conditions	41860	San Francisco-Oakland-Hayward, CA	06	California	001	Alameda	37.793624	-122.263376
10/03/2014	AQS	060010012	3	12.7	ug/m3 LC	52	Laney College	1	100.0000	88101	PM2.5 - Local Conditions	41860	San Francisco-Oakland-Hayward, CA	06	California	001	Alameda	37.793624	-122.263376
10/04/2014	AQS	060010012	3	9.5	ug/m3 LC	40	Laney College	1	100.0000	88101	PM2.5 - Local Conditions	41860	San Francisco-Oakland-Hayward, CA	06	California	001	Alameda	37.793624	-122.263376
10/05/2014	AQS	060010012	3	8.3	ug/m3 LC	35	Laney College	1	100.0000	88101	PM2.5 - Local Conditions	41860	San Francisco-Oakland-Hayward, CA	06	California	001	Alameda	37.793624	-122.263376
10/06/2014	AQS	060010012	3	8.9	ug/m3 LC	37	Laney College	1	100.0000	88101	PM2.5 - Local Conditions	41860	San Francisco-Oakland-Hayward, CA	06	California	001	Alameda	37.793624	-122.263376
10/07/2014	AQS	060010012	3	11.7	ug/m3 LC	49	Laney College	1	100.0000	88101	PM2.5 - Local Conditions	41860	San Francisco-Oakland-Hayward, CA	06	California	001	Alameda	37.793624	-122.263376
10/08/2014	AQS	060010012	3	10.5	ug/m3 LC	44	Laney College	1	100.0000	88101	PM2.5 - Local Conditions	41860	San Francisco-Oakland-Hayward, CA	06	California	001	Alameda	37.793624	-122.263376
10/09/2014	AQS	060010012	3	8.1	ug/m3 LC	34	Laney College	1	100.0000	88101	PM2.5 - Local Conditions	41860	San Francisco-Oakland-Hayward, CA	06	California	001	Alameda	37.793624	-122.263376
10/10/2014	AQS	060010012	3	7.7	ug/m3 LC	32	Laney College	1	100.0000	88101	PM2.5 - Local Conditions	41860	San Francisco-Oakland-Hayward, CA	06	California	001	Alameda	37.793624	-122.263376
10/11/2014	AQS	060010012	3	7	ug/m3 LC	29	Laney College	1	100.0000	88101	PM2.5 - Local Conditions	41860	San Francisco-Oakland-Hayward, CA	06	California	001	Alameda	37.793624	-122.263376
10/12/2014	AQS	060010012	3	10.8	ug/m3 LC	45	Laney College	1	100.0000	88101	PM2.5 - Local Conditions	41860	San Francisco-Oakland-Hayward, CA	06	California	001	Alameda	37.793624	-122.263376
10/13/2014	AQS	060010012	3	10.4	ug/m3 LC	43	Laney College	1	100.0000	88101	PM2.5 - Local Conditions	41860	San Francisco-Oakland-Hayward, CA	06	California	001	Alameda	37.793624	-122.263376
10/14/2014	AQS	060010012	3	9.6	ug/m3 LC	40	Laney College	1	100.0000	88101	PM2.5 - Local Conditions	41860	San Francisco-Oakland-Hayward, CA	06	California	001	Alameda	37.793624	-122.263376
10/15/2014	AQS	060010012	3	6.1	ug/m3 LC	25	Laney College	1	100.0000	88101	PM2.5 - Local Conditions	41860	San Francisco-Oakland-Hayward, CA	06	California	001	Alameda	37.793624	-122.263376
10/16/2014	AQS	060010012	3	6.7	ug/m3 LC	28	Laney College	1	100.0000	88101	PM2.5 - Local Conditions	41860	San Francisco-Oakland-Hayward, CA	06	California	001	Alameda	37.793624	-122.263376
10/17/2014	AQS	060010012	3	6	ug/m3 LC	25	Laney College	1	100.0000	88101	PM2.5 - Local Conditions	41860	San Francisco-Oakland-Hayward, CA	06	California	001	Alameda	37.793624	-122.263376
10/18/2014	AQS	060010012	3	6.4	ug/m3 LC	27	Laney College	1	100.0000	88101	PM2.5 - Local Conditions	41860	San Francisco-Oakland-Hayward, CA	06	California	001	Alameda	37.793624	-122.263376
10/19/2014	AQS	060010012	3	4.8	ug/m3 LC	20	Laney College	1	100.0000	88101	PM2.5 - Local Conditions	41860	San Francisco-Oakland-Hayward, CA	06	California	001	Alameda	37.793624	-122.263376
10/20/2014	AQS	060010012	3	4.5	ug/m3 LC	19	Laney College	1	100.0000	88101	PM2.5 - Local Conditions	41860	San Francisco-Oakland-Hayward, CA	06	California	001	Alameda	37.793624	-122.263376
10/21/2014	AQS	060010012	3	5.4	ug/m3 LC	23	Laney College	1	100.0000	88101	PM2.5 - Local Conditions	41860	San Francisco-Oakland-Hayward, CA	06	California	001	Alameda	37.793624	-122.263376
10/22/2014	AQS	060010012	3	8.5	ug/m3 LC	35	Laney College	1	100.0000	88101	PM2.5 - Local Conditions	41860	San Francisco-Oakland-Hayward, CA	06	California	001	Alameda	37.793624	-122.263376
10/23/2014	AQS	060010012	3	8.2	ug/m3 LC	34	Laney College	1	100.0000	88101	PM2.5 - Local Conditions	41860	San Francisco-Oakland-Hayward, CA	06	California	001	Alameda	37.793624	-122.263376
10/24/2014	AQS	060010012	3	8.1	ug/m3 LC	34	Laney College	1	100.0000	88101	PM2.5 - Local Conditions	41860	San Francisco-Oakland-Hayward, CA	06	California	001	Alameda	37.793624	-122.263376
10/25/2014	AQS	060010012	3	5.9	ug/m3 LC	25	Laney College	1	100.0000	88101	PM2.5 - Local Conditions	41860	San Francisco-Oakland-Hayward, CA	06	California	001	Alameda	37.793624	-122.263376
10/26/2014	AQS	060010012	3	4.8	ug/m3 LC	20	Laney College	1	100.0000	88101	PM2.5 - Local Conditions	41860	San Francisco-Oakland-Hayward, CA	06	California	001	Alameda	37.793624	-122.263376
10/27/2014	AQS	060010012	3	7.5	ug/m3 LC	31	Laney College	1	100.0000	88101	PM2.5 - Local Conditions	41860	San Francisco-Oakland-Hayward, CA	06	California	001	Alameda	37.793624	-122.263376
10/28/2014	AQS	060010012	3	8.6	ug/m3 LC	36	Laney College	1	100.0000	88101	PM2.5 - Local Conditions	41860	San Francisco-Oakland-Hayward, CA	06	California	001	Alameda	37.793624	-122.263376
10/29/2014	AQS	060010012	3	11.7	ug/m3 LC	49	Laney College	1	100.0000	88101	PM2.5 - Local Conditions	41860	San Francisco-Oakland-Hayward, CA	06	California	001	Alameda	37.793624	-122.263376
10/30/2014	AQS	060010012	3	10.7	ug/m3 LC	45	Laney College	1	100.0000	88101	PM2.5 - Local Conditions	41860	San Francisco-Oakland-Hayward, CA	06	California	001	Alameda	37.793624	-122.263376
10/31/2014	AQS	060010012	3	5	ug/m3 LC	21	Laney College	1	100.0000	88101	PM2.5 - Local Conditions	41860	San Francisco-Oakland-Hayward, CA	06	California	001	Alameda	37.793624	-122.263376
11/01/2014	AQS	060010012	3	4.8	ug/m3 LC	20	Laney College	1	100.0000	88101	PM2.5 - Local Conditions	41860	San Francisco-Oakland-Hayward, CA	06	California	001	Alameda	37.793624	-122.263376
11/02/2014	AQS	060010012	3	7.3	ug/m3 LC	30	Laney College	1	100.0000	88101	PM2.5 - Local Conditions	41860	San Francisco-Oakland-Hayward, CA	06	California	001	Alameda	37.793624	-122.263376
11/03/2014	AQS	060010012	3	7.3	ug/m3 LC	30	Laney College	1	100.0000	88101	PM2.5 - Local Conditions	41860	San Francisco-Oakland-Hayward, CA	06	California	001	Alameda	37.793624	-122.263376
11/04/2014	AQS	060010012	3	10.5	ug/m3 LC	44	Laney College	1	100.0000	88101	PM2.5 - Local Conditions	41860	San Francisco-Oakland-Hayward, CA	06	California	001	Alameda	37.793624	-122.263376
11/05/2014	AQS	060010012	3	11.5	ug/m3 LC	48	Laney College	1	100.0000	88101	PM2.5 - Local Conditions	41860	San Francisco-Oakland-Hayward, CA	06	California	001	Alameda	37.793624	-122.263376
11/06/2014	AQS	060010012	3	17	ug/m3 LC	61	Laney College	1	100.0000	88101	PM2.5 - Local Conditions	41860	San Francisco-Oakland-Hayward, CA	06	California	001	Alameda	37.793624	-122.263376
11/07/2014	AQS	060010012	3	10.4	ug/m3 LC	43	Laney College	1	100.0000	88101	PM2.5 - Local Conditions	41860	San Francisco-Oakland-Hayward, CA	06	California	001	Alameda	37.793624	-122.263376
11/08/2014	AQS	060010012	3	14.4	ug/m3 LC	56	Laney College	1	100.0000	88101	PM2.5 - Local Conditions	41860	San Francisco-Oakland-Hayward, CA	06	California	001	Alameda	37.793624	-122.263376
11/09/2014	AQS	060010012	3	8.5	ug/m3 LC	35	Laney College	1	100.0000	88101	PM2.5 - Local Conditions	41860	San Francisco-Oakland-Hayward, CA	06	California	001	Alameda	37.793624	-122.263376
11/10/2014	AQS	060010012	3	13.2	ug/m3 LC	53	Laney College	1	100.0000	88101	PM2.5 - Local Conditions	41860	San Francisco-Oakland-Hayward, CA	06	California	001	Alameda	37.793624	-122.263376
11/11/2014	AQS	060010012	3	6.8	ug/m3 LC	28	Laney College	1	100.0000	88101	PM2.5 - Local Conditions	41860	San Francisco-Oakland-Hayward, CA	06	California	001	Alameda	37.793624	-122.263376
11/12/2014	AQS	060010012	3	8	ug/m3 LC	33	Laney College	1	100.0000	88101	PM2.5 - Local Conditions	41860	San Francisco-Oakland-Hayward, CA	06	California	001	Alameda	37.793624	-122.263376
11/13/2014	AQS	060010012	3	5.7	ug/m3 LC	24	Laney College	1	100.0000	88101	PM2.5 - Local Conditions	41860	San Francisco-Oakland-Hayward, CA	06	California	001	Alameda	37.793624	-122.263376
11/14/2014	AQS	060010012	3	8.8	ug/m3 LC	37	Laney College	1	100.0000	88101	PM2.5 - Local Conditions	41860	San Francisco-Oakland-Hayward, CA	06	California	001	Alameda	37.793624	-122.263376
11/15/2014	AQS	060010012	3	8.3	ug/m3 LC	35	Laney College	1	100.0000	88101	PM2.5 - Local Conditions	41860	San Francisco-Oakland-Hayward, CA	06	California	001	Alameda	37.793624	-122.263376
11/16/2014	AQS	060010012	3	5.5	ug/m3 LC	23	Laney College	1	100.0000	88101	PM2.5 - Local Conditions	41860	San Francisco-Oakland-Hayward, CA	06	California	001	Alameda	37.793624	-122.263376
11/17/2014	AQS	060010012	3	5.3	ug/m3 LC	22	Laney College	1	100.0000	88101	PM2.5 - Local Conditions	41860	San Francisco-Oakland-Hayward, CA	06	California	001	Alameda	37.793624	-122.263376
11/18/2014	AQS	060010012	3	17.8	ug/m3 LC	63	Laney College	1	100.0000	88101	PM2.5 - Local Conditions	41860	San Francisco-Oakland-Hayward, CA	06	California	001	Alameda	37.793624	-122.263376
11/19/2014	AQS	060010012	3	11.2	ug/m3 LC	47	Laney College	1	100.0000	88101	PM2.5 - Local Conditions	41860	San Francisco-Oakland-Hayward, CA	06	California	001	Alameda	37.793624	-122.263376
11/20/2014	AQS	060010012	3	11.3	ug/m3 LC	47	Laney College	1	100.0000	88101	PM2.5 - Local Conditions	41860	San Francisco-Oakland-Hayward, CA	06	California	001	Alameda	37.793624	-122.263376
11/21/2014	AQS	060010012	3	12.4	ug/m3 LC	52	Laney College	1	100.0000	88101	PM2.5 - Local Conditions	41860	San Francisco-Oakland-Hayward, CA	06	California	001	Alameda	37.793624	-122.263376
11/22/2014	AQS	060010012	3	7.5	ug/m3 LC	31	Laney College	1	100.0000	88101	PM2.5 - Local Conditions	41860	San Francisco-Oakland-Hayward, CA	06	California	001	Alameda	37.793624	-122.263376
11/23/2014	AQS	060010012	3	8.1	ug/m3 LC	34	Laney College	1	100.0000	88101	PM2.5 - Local Conditions	41860	San Francisco-Oakland-Hayward, CA	06	California	001	Alameda	37.793624	-122.263376
11/24/2014	AQS	060010012	3	10.1	ug/m3 LC	42	Laney College	1	100.0000	88101	PM2.5 - Local Conditions	41860	San Francisco-Oakland-Hayward, CA	06	California	001	Alameda	37.793624	-122.263376
11/25/2014	AQS	060010012	3	14.5	ug/m3 LC	56	Laney College	1	100.0000	88101	PM2.5 - Local Conditions	41860	San Francisco-Oakland-Hayward, CA	06	California	001	Alameda	37.793624	-122.263376
11/26/2014	AQS	060010012	3	22.2	ug/m3 LC	72	Laney College	1	100.0000	88101	PM2.5 - Local Conditions	41860	San Francisco-Oakland-Hayward, CA	06	California	001	Alameda	37.793624	-122.263376
11/27/2014	AQS	060010012	3	26	ug/m3 LC	80	Laney College	1	100.0000	88101	PM2.5 - Local Conditions	41860	San Francisco-Oakland-Hayward, CA	06	California	001	Alameda	37.793624	-122.263376
11/28/2014	AQS	060010012	3	14.2	ug/m3 LC	55	Laney College	1	100.0000	88101	PM2.5 - Local Conditions	41860	San Francisco-Oakland-Hayward, CA	06	California	001	Alameda	37.793624	-122.263376
11/29/2014	AQS	060010012	3	6.1	ug/m3 LC	25	Laney College	1	100.0000	88101	PM2.5 - Local Conditions	41860	San Francisco-Oakland-Hayward, CA	06	California	001	Alameda	37.793624	-122.263376
11/30/2014	AQS	060010012	3	6.5	ug/m3 LC	27	Laney College	1	100.0000	88101	PM2.5 - Local Conditions	41860	San Francisco-Oakland-Hayward, CA	06	California	001	Alameda	37.793624	-122.263376
12/01/2014	AQS	060010012	3	11.3	ug/m3 LC	47	Laney College	1	100.0000	88101	PM2.5 - Local Conditions	41860	San Francisco-Oakland-Hayward, CA	06	California	001	Alameda	37.793624	-122.263376
12/02/2014	AQS	060010012	3	3.2	ug/m3 LC	13	Laney College	1	100.0000	88101	PM2.5 - Local Conditions	41860	San Francisco-Oakland-Hayward, CA	06	California	001	Alameda	37.793624	-122.263376
12/03/2014	AQS	060010012	3	4.7	ug/m3 LC	20	Laney College	1	100.0000	88101	PM2.5 - Local Conditions	41860	San Francisco-Oakland-Hayward, CA	06	California	001	Alameda	37.793624	-122.263376
12/04/2014	AQS	060010012	3	6.3	ug/m3 LC	26	Laney College	1	100.0000	88101	PM2.5 - Local Conditions	41860	San Francisco-Oakland-Hayward, CA	06	California	001	Alameda	37.793624	-122.263376
12/05/2014	AQS	060010012	3	6.3	ug/m3 LC	26	Laney College	1	100.0000	88101	PM2.5 - Local Conditions	41860	San Francisco-Oakland-Hayward, CA	06	California	001	Alameda	37.793624	-122.263376
12/06/2014	AQS	060010012	3	3.7	ug/m3 LC	15	Laney College	1	100.0000	88101	PM2.5 - Local Conditions	41860	San Francisco-Oakland-Hayward, CA	06	California	001	Alameda	37.793624	-122.263376
12/07/2014	AQS	060010012	3	12.4	ug/m3 LC	52	Laney College	1	100.0000	88101	PM2.5 - Local Conditions	41860	San Francisco-Oakland-Hayward, CA	06	California	001	Alameda	37.793624	-122.263376
12/08/2014	AQS	060010012	3	8.5	ug/m3 LC	35	Laney College	1	100.0000	88101	PM2.5 - Local Conditions	41860	San Francisco-Oakland-Hayward, CA	06	California	001	Alameda	37.793624	-122.263376
12/09/2014	AQS	060010012	3	15.1	ug/m3 LC	57	Laney College	1	100.0000	88101	PM2.5 - Local Conditions	41860	San Francisco-Oakland-Hayward, CA	06	California	001	Alameda	37.793624	-122.263376
12/10/2014	AQS	060010012	3	11.6	ug/m3 LC	48	Laney College	1	100.0000	88101	PM2.5 - Local Conditions	41860	San Francisco-Oakland-Hayward, CA	06	California	001	Alameda	37.793624	-122.263376
12/11/2014	AQS	060010012	3	4.2	ug/m3 LC	18	Laney College	1	100.0000	88101	PM2.5 - Local Conditions	41860	San Francisco-Oakland-Hayward, CA	06	California	001	Alameda	37.793624	-122.263376
12/12/2014	AQS	060010012	3	6.7	ug/m3 LC	28	Laney College	1	100.0000	88101	PM2.5 - Local Conditions	41860	San Francisco-Oakland-Hayward, CA	06	California	001	Alameda	37.793624	-122.263376
12/13/2014	AQS	060010012	3	11	ug/m3 LC	46	Laney College	1	100.0000	88101	PM2.5 - Local Conditions	41860	San Francisco-Oakland-Hayward, CA	06	California	001	Alameda	37.793624	-122.263376
12/14/2014	AQS	060010012	3	7.9	ug/m3 LC	33	Laney College	1	100.0000	88101	PM2.5 - Local Conditions	41860	San Francisco-Oakland-Hayward, CA	06	California	001	Alameda	37.793624	-122.263376
12/15/2014	AQS	060010012	3	4.8	ug/m3 LC	20	Laney College	1	100.0000	88101	PM2.5 - Local Conditions	41860	San Francisco-Oakland-Hayward, CA	06	California	001	Alameda	37.793624	-122.263376
12/16/2014	AQS	060010012	3	6	ug/m3 LC	25	Laney College	1	100.0000	88101	PM2.5 - Local Conditions	41860	San Francisco-Oakland-Hayward, CA	06	California	001	Alameda	37.793624	-122.263376
12/17/2014	AQS	060010012	3	7.3	ug/m3 LC	30	Laney College	1	100.0000	88101	PM2.5 - Local Conditions	41860	San Francisco-Oakland-Hayward, CA	06	California	001	Alameda	37.793624	-122.263376
12/18/2014	AQS	060010012	3	6.4	ug/m3 LC	27	Laney College	1	100.0000	88101	PM2.5 - Local Conditions	41860	San Francisco-Oakland-Hayward, CA	06	California	001	Alameda	37.793624	-122.263376
12/19/2014	AQS	060010012	3	5.3	ug/m3 LC	22	Laney College	1	100.0000	88101	PM2.5 - Local Conditions	41860	San Francisco-Oakland-Hayward, CA	06	California	001	Alameda	37.793624	-122.263376
12/20/2014	AQS	060010012	3	10.1	ug/m3 LC	42	Laney College	1	100.0000	88101	PM2.5 - Local Conditions	41860	San Francisco-Oakland-Hayward, CA	06	California	001	Alameda	37.793624	-122.263376
12/21/2014	AQS	060010012	3	4.7	ug/m3 LC	20	Laney College	1	100.0000	88101	PM2.5 - Local Conditions	41860	San Francisco-Oakland-Hayward, CA	06	California	001	Alameda	37.793624	-122.263376
12/22/2014	AQS	060010012	3	9.9	ug/m3 LC	41	Laney College	1	100.0000	88101	PM2.5 - Local Conditions	41860	San Francisco-Oakland-Hayward, CA	06	California	001	Alameda	37.793624	-122.263376
12/23/2014	AQS	060010012	3	10.8	ug/m3 LC	45	Laney College	1	100.0000	88101	PM2.5 - Local Conditions	41860	San Francisco-Oakland-Hayward, CA	06	California	001	Alameda	37.793624	-122.263376
12/24/2014	AQS	060010012	3	4.9	ug/m3 LC	20	Laney College	1	100.0000	88101	PM2.5 - Local Conditions	41860	San Francisco-Oakland-Hayward, CA	06	California	001	Alameda	37.793624	-122.263376
12/25/2014	AQS	060010012	3	2.4	ug/m3 LC	10	Laney College	1	100.0000	88101	PM2.5 - Local Conditions	41860	San Francisco-Oakland-Hayward, CA	06	California	001	Alameda	37.793624	-122.263376
12/26/2014	AQS	060010012	3	5.2	ug/m3 LC	22	Laney College	1	100.0000	88101	PM2.5 - Local Conditions	41860	San Francisco-Oakland-Hayward, CA	06	California	001	Alameda	37.793624	-122.263376
12/27/2014	AQS	060010012	3	10.5	ug/m3 LC	44	Laney College	1	100.0000	88101	PM2.5 - Local Conditions	41860	San Francisco-Oakland-Hayward, CA	06	California	001	Alameda	37.793624	-122.263376
12/28/2014	AQS	060010012	3	19.1	ug/m3 LC	66	Laney College	1	100.0000	88101	PM2.5 - Local Conditions	41860	San Francisco-Oakland-Hayward, CA	06	California	001	Alameda	37.793624	-122.263376
12/29/2014	AQS	060010012	3	7.5	ug/m3 LC	31	Laney College	1	100.0000	88101	PM2.5 - Local Conditions	41860	San Francisco-Oakland-Hayward, CA	06	California	001	Alameda	37.793624	-122.263376
12/30/2014	AQS	060010012	3	3.1	ug/m3 LC	13	Laney College	1	100.0000	88101	PM2.5 - Local Conditions	41860	San Francisco-Oakland-Hayward, CA	06	California	001	Alameda	37.793624	-122.263376
12/31/2014	AQS	060010012	3	8.8	ug/m3 LC	37	Laney College	1	100.0000	88101	PM2.5 - Local Conditions	41860	San Francisco-Oakland-Hayward, CA	06	California	001	Alameda	37.793624	-122.263376
01/09/2014	AQS	060031001	1	7.2	ug/m3 LC	30		1	100.0000	88502	Acceptable PM2.5 AQI & Speciation Mass			06	California	003	Alpine	38.796194	-119.751861
01/17/2014	AQS	060031001	1	7	ug/m3 LC	29		1	100.0000	88502	Acceptable PM2.5 AQI & Speciation Mass			06	California	003	Alpine	38.796194	-119.751861
01/24/2014	AQS	060031001	1	7.3	ug/m3 LC	30		1	100.0000	88502	Acceptable PM2.5 AQI & Speciation Mass			06	California	003	Alpine	38.796194	-119.751861
01/29/2014	AQS	060031001	1	12.6	ug/m3 LC	52		1	100.0000	88502	Acceptable PM2.5 AQI & Speciation Mass			06	California	003	Alpine	38.796194	-119.751861
02/04/2014	AQS	060031001	1	10.1	ug/m3 LC	42		1	100.0000	88502	Acceptable PM2.5 AQI & Speciation Mass			06	California	003	Alpine	38.796194	-119.751861
02/10/2014	AQS	060031001	1	4.5	ug/m3 LC	19		1	100.0000	88502	Acceptable PM2.5 AQI & Speciation Mass			06	California	003	Alpine	38.796194	-119.751861
02/18/2014	AQS	060031001	1	5.8	ug/m3 LC	24		1	100.0000	88502	Acceptable PM2.5 AQI & Speciation Mass			06	California	003	Alpine	38.796194	-119.751861
02/24/2014	AQS	060031001	1	5.4	ug/m3 LC	23		1	100.0000	88502	Acceptable PM2.5 AQI & Speciation Mass			06	California	003	Alpine	38.796194	-119.751861
02/27/2014	AQS	060031001	1	5.9	ug/m3 LC	25		1	100.0000	88502	Acceptable PM2.5 AQI & Speciation Mass			06	California	003	Alpine	38.796194	-119.751861
03/06/2014	AQS	060031001	1	4.1	ug/m3 LC	17		1	100.0000	88502	Acceptable PM2.5 AQI & Speciation Mass			06	California	003	Alpine	38.796194	-119.751861
03/12/2014	AQS	060031001	1	5.5	ug/m3 LC	23		1	100.0000	88502	Acceptable PM2.5 AQI & Speciation Mass			06	California	003	Alpine	38.796194	-119.751861
03/19/2014	AQS	060031001	1	4.4	ug/m3 LC	18		1	100.0000	88502	Acceptable PM2.5 AQI & Speciation Mass			06	California	003	Alpine	38.796194	-119.751861
04/01/2014	AQS	060031001	1	6.5	ug/m3 LC	27		1	100.0000	88502	Acceptable PM2.5 AQI & Speciation Mass			06	California	003	Alpine	38.796194	-119.751861
04/14/2014	AQS	060031001	1	6.5	ug/m3 LC	27		1	100.0000	88502	Acceptable PM2.5 AQI & Speciation Mass			06	California	003	Alpine	38.796194	-119.751861
04/17/2014	AQS	060031001	1	5.8	ug/m3 LC	24		1	100.0000	88502	Acceptable PM2.5 AQI & Speciation Mass			06	California	003	Alpine	38.796194	-119.751861
04/23/2014	AQS	060031001	1	6.1	ug/m3 LC	25		1	100.0000	88502	Acceptable PM2.5 AQI & Speciation Mass			06	California	003	Alpine	38.796194	-119.751861
04/29/2014	AQS	060031001	1	5.5	ug/m3 LC	23		1	100.0000	88502	Acceptable PM2.5 AQI & Speciation Mass			06	California	003	Alpine	38.796194	-119.751861
05/05/2014	AQS	060031001	1	4.7	ug/m3 LC	20		1	100.0000	88502	Acceptable PM2.5 AQI & Speciation Mass			06	California	003	Alpine	38.796194	-119.751861
05/12/2014	AQS	060031001	1	4.7	ug/m3 LC	20		1	100.0000	88502	Acceptable PM2.5 AQI & Speciation Mass			06	California	003	Alpine	38.796194	-119.751861
05/19/2014	AQS	060031001	1	12.7	ug/m3 LC	52		1	100.0000	88502	Acceptable PM2.5 AQI & Speciation Mass			06	California	003	Alpine	38.796194	-119.751861
05/22/2014	AQS	060031001	1	4.3	ug/m3 LC	18		1	100.0000	88502	Acceptable PM2.5 AQI & Speciation Mass			06	California	003	Alpine	38.796194	-119.751861
06/16/2014	AQS	060031001	1	7.2	ug/m3 LC	30		1	100.0000	88502	Acceptable PM2.5 AQI & Speciation Mass			06	California	003	Alpine	38.796194	-119.751861
06/23/2014	AQS	060031001	1	5.1	ug/m3 LC	21		1	100.0000	88502	Acceptable PM2.5 AQI & Speciation Mass			06	California	003	Alpine	38.796194	-119.751861
06/30/2014	AQS	060031001	1	4.5	ug/m3 LC	19		1	100.0000	88502	Acceptable PM2.5 AQI & Speciation Mass			06	California	003	Alpine	38.796194	-119.751861
07/07/2014	AQS	060031001	1	7.6	ug/m3 LC	32		1	100.0000	88502	Acceptable PM2.5 AQI & Speciation Mass			06	California	003	Alpine	38.796194	-119.751861
07/10/2014	AQS	060031001	1	7.9	ug/m3 LC	33		1	100.0000	88502	Acceptable PM2.5 AQI & Speciation Mass			06	California	003	Alpine	38.796194	-119.751861
07/16/2014	AQS	060031001	1	11.3	ug/m3 LC	47		1	100.0000	88502	Acceptable PM2.5 AQI & Speciation Mass			06	California	003	Alpine	38.796194	-119.751861
07/22/2014	AQS	060031001	1	6.5	ug/m3 LC	27		1	100.0000	88502	Acceptable PM2.5 AQI & Speciation Mass			06	California	003	Alpine	38.796194	-119.751861
07/28/2014	AQS	060031001	1	2.9	ug/m3 LC	12		1	100.0000	88502	Acceptable PM2.5 AQI & Speciation Mass			06	California	003	Alpine	38.796194	-119.751861
08/04/2014	AQS	060031001	1	26.1	ug/m3 LC	80		1	100.0000	88502	Acceptable PM2.5 AQI & Speciation Mass			06	California	003	Alpine	38.796194	-119.751861
08/11/2014	AQS	060031001	1	5	ug/m3 LC	21		1	100.0000	88502	Acceptable PM2.5 AQI & Speciation Mass			06	California	003	Alpine	38.796194	-119.751861
08/18/2014	AQS	060031001	1	5.8	ug/m3 LC	24		1	100.0000	88502	Acceptable PM2.5 AQI & Speciation Mass			06	California	003	Alpine	38.796194	-119.751861
08/21/2014	AQS	060031001	1	6.2	ug/m3 LC	26		1	100.0000	88502	Acceptable PM2.5 AQI & Speciation Mass			06	California	003	Alpine	38.796194	-119.751861
08/27/2014	AQS	060031001	1	2.9	ug/m3 LC	12		1	100.0000	88502	Acceptable PM2.5 AQI & Speciation Mass			06	California	003	Alpine	38.796194	-119.751861
09/02/2014	AQS	060031001	1	8.6	ug/m3 LC	36		1	100.0000	88502	Acceptable PM2.5 AQI & Speciation Mass			06	California	003	Alpine	38.796194	-119.751861
09/14/2014	AQS	060031001	1	0.8	ug/m3 LC	3		1	100.0000	88502	Acceptable PM2.5 AQI & Speciation Mass			06	California	003	Alpine	38.796194	-119.751861
09/20/2014	AQS	060031001	1	7.5	ug/m3 LC	31		1	100.0000	88502	Acceptable PM2.5 AQI & Speciation Mass			06	California	003	Alpine	38.796194	-119.751861
09/26/2014	AQS	060031001	1	5.6	ug/m3 LC	23		1	100.0000	88502	Acceptable PM2.5 AQI & Speciation Mass			06	California	003	Alpine	38.796194	-119.751861
10/02/2014	AQS	060031001	1	3.1	ug/m3 LC	13		1	100.0000	88502	Acceptable PM2.5 AQI & Speciation Mass			06	California	003	Alpine	38.796194	-119.751861
10/08/2014	AQS	060031001	1	2.3	ug/m3 LC	10		1	100.0000	88502	Acceptable PM2.5 AQI & Speciation Mass			06	California	003	Alpine	38.796194	-119.751861
10/14/2014	AQS	060031001	1	2.6	ug/m3 LC	11		1	100.0000	88502	Acceptable PM2.5 AQI & Speciation Mass			06	California	003	Alpine	38.796194	-119.751861
10/20/2014	AQS	060031001	1	5.1	ug/m3 LC	21		1	100.0000	88502	Acceptable PM2.5 AQI & Speciation Mass			06	California	003	Alpine	38.796194	-119.751861
10/26/2014	AQS	060031001	1	3.8	ug/m3 LC	16		1	100.0000	88502	Acceptable PM2.5 AQI & Speciation Mass			06	California	003	Alpine	38.796194	-119.751861
11/01/2014	AQS	060031001	1	6.1	ug/m3 LC	25		1	100.0000	88502	Acceptable PM2.5 AQI & Speciation Mass			06	California	003	Alpine	38.796194	-119.751861
11/07/2014	AQS	060031001	1	0.9	ug/m3 LC	4		1	100.0000	88502	Acceptable PM2.5 AQI & Speciation Mass			06	California	003	Alpine	38.796194	-119.751861
11/13/2014	AQS	060031001	1	2.7	ug/m3 LC	11		1	100.0000	88502	Acceptable PM2.5 AQI & Speciation Mass			06	California	003	Alpine	38.796194	-119.751861
11/19/2014	AQS	060031001	1	3.6	ug/m3 LC	15		1	100.0000	88502	Acceptable PM2.5 AQI & Speciation Mass			06	California	003	Alpine	38.796194	-119.751861
11/25/2014	AQS	060031001	1	2.9	ug/m3 LC	12		1	100.0000	88502	Acceptable PM2.5 AQI & Speciation Mass			06	California	003	Alpine	38.796194	-119.751861
12/01/2014	AQS	060031001	1	7.6	ug/m3 LC	32		1	100.0000	88502	Acceptable PM2.5 AQI & Speciation Mass			06	California	003	Alpine	38.796194	-119.751861
12/19/2014	AQS	060031001	1	3.3	ug/m3 LC	14		1	100.0000	88502	Acceptable PM2.5 AQI & Speciation Mass			06	California	003	Alpine	38.796194	-119.751861
01/01/2014	AQS	060070008	1	58.6	ug/m3 LC	153	Chico-East Avenue	1	100.0000	88101	PM2.5 - Local Conditions	17020	Chico, CA	06	California	007	Butte	39.76168	-121.84047
01/02/2014	AQS	060070008	1	22.4	ug/m3 LC	73	Chico-East Avenue	1	100.0000	88101	PM2.5 - Local Conditions	17020	Chico, CA	06	California	007	Butte	39.76168	-121.84047
01/03/2014	AQS	060070008	1	32	ug/m3 LC	93	Chico-East Avenue	1	100.0000	88101	PM2.5 - Local Conditions	17020	Chico, CA	06	California	007	Butte	39.76168	-121.84047
01/04/2014	AQS	060070008	1	28.2	ug/m3 LC	85	Chico-East Avenue	1	100.0000	88101	PM2.5 - Local Conditions	17020	Chico, CA	06	California	007	Butte	39.76168	-121.84047
01/05/2014	AQS	060070008	1	22.6	ug/m3 LC	73	Chico-East Avenue	1	100.0000	88101	PM2.5 - Local Conditions	17020	Chico, CA	06	California	007	Butte	39.76168	-121.84047
01/06/2014	AQS	060070008	1	32.5	ug/m3 LC	94	Chico-East Avenue	1	100.0000	88101	PM2.5 - Local Conditions	17020	Chico, CA	06	California	007	Butte	39.76168	-121.84047
01/07/2014	AQS	060070008	1	24.5	ug/m3 LC	77	Chico-East Avenue	1	100.0000	88101	PM2.5 - Local Conditions	17020	Chico, CA	06	California	007	Butte	39.76168	-121.84047
01/08/2014	AQS	060070008	1	32.1	ug/m3 LC	93	Chico-East Avenue	1	100.0000	88101	PM2.5 - Local Conditions	17020	Chico, CA	06	California	007	Butte	39.76168	-121.84047
01/09/2014	AQS	060070008	1	22.3	ug/m3 LC	72	Chico-East Avenue	1	100.0000	88101	PM2.5 - Local Conditions	17020	Chico, CA	06	California	007	Butte	39.76168	-121.84047
01/10/2014	AQS	060070008	1	23.1	ug/m3 LC	74	Chico-East Avenue	1	100.0000	88101	PM2.5 - Local Conditions	17020	Chico, CA	06	California	007	Butte	39.76168	-121.84047
01/11/2014	AQS	060070008	1	18.3	ug/m3 LC	64	Chico-East Avenue	1	100.0000	88101	PM2.5 - Local Conditions	17020	Chico, CA	06	California	007	Butte	39.76168	-121.84047
01/12/2014	AQS	060070008	1	3.5	ug/m3 LC	15	Chico-East Avenue	1	100.0000	88101	PM2.5 - Local Conditions	17020	Chico, CA	06	California	007	Butte	39.76168	-121.84047
01/13/2014	AQS	060070008	1	9.8	ug/m3 LC	41	Chico-East Avenue	1	100.0000	88101	PM2.5 - Local Conditions	17020	Chico, CA	06	California	007	Butte	39.76168	-121.84047
01/14/2014	AQS	060070008	1	14.6	ug/m3 LC	56	Chico-East Avenue	1	100.0000	88101	PM2.5 - Local Conditions	17020	Chico, CA	06	California	007	Butte	39.76168	-121.84047
01/15/2014	AQS	060070008	1	14.2	ug/m3 LC	55	Chico-East Avenue	1	100.0000	88101	PM2.5 - Local Conditions	17020	Chico, CA	06	California	007	Butte	39.76168	-121.84047
01/16/2014	AQS	060070008	1	13.2	ug/m3 LC	53	Chico-East Avenue	1	100.0000	88101	PM2.5 - Local Conditions	17020	Chico, CA	06	California	007	Butte	39.76168	-121.84047
01/17/2014	AQS	060070008	1	19.3	ug/m3 LC	66	Chico-East Avenue	1	100.0000	88101	PM2.5 - Local Conditions	17020	Chico, CA	06	California	007	Butte	39.76168	-121.84047
01/18/2014	AQS	060070008	1	15.9	ug/m3 LC	59	Chico-East Avenue	1	100.0000	88101	PM2.5 - Local Conditions	17020	Chico, CA	06	California	007	Butte	39.76168	-121.84047
01/19/2014	AQS	060070008	1	17.5	ug/m3 LC	62	Chico-East Avenue	1	100.0000	88101	PM2.5 - Local Conditions	17020	Chico, CA	06	California	007	Butte	39.76168	-121.84047
01/20/2014	AQS	060070008	1	16	ug/m3 LC	59	Chico-East Avenue	1	100.0000	88101	PM2.5 - Local Conditions	17020	Chico, CA	06	California	007	Butte	39.76168	-121.84047
01/21/2014	AQS	060070008	1	14.5	ug/m3 LC	56	Chico-East Avenue	1	100.0000	88101	PM2.5 - Local Conditions	17020	Chico, CA	06	California	007	Butte	39.76168	-121.84047
01/22/2014	AQS	060070008	1	17.3	ug/m3 LC	62	Chico-East Avenue	1	100.0000	88101	PM2.5 - Local Conditions	17020	Chico, CA	06	California	007	Butte	39.76168	-121.84047
01/23/2014	AQS	060070008	1	5.9	ug/m3 LC	25	Chico-East Avenue	1	100.0000	88101	PM2.5 - Local Conditions	17020	Chico, CA	06	California	007	Butte	39.76168	-121.84047
01/24/2014	AQS	060070008	1	15.8	ug/m3 LC	59	Chico-East Avenue	1	100.0000	88101	PM2.5 - Local Conditions	17020	Chico, CA	06	California	007	Butte	39.76168	-121.84047
01/25/2014	AQS	060070008	1	13.5	ug/m3 LC	54	Chico-East Avenue	1	100.0000	88101	PM2.5 - Local Conditions	17020	Chico, CA	06	California	007	Butte	39.76168	-121.84047
01/26/2014	AQS	060070008	1	13.9	ug/m3 LC	55	Chico-East Avenue	1	100.0000	88101	PM2.5 - Local Conditions	17020	Chico, CA	06	California	007	Butte	39.76168	-121.84047
01/27/2014	AQS	060070008	1	19.7	ug/m3 LC	67	Chico-East Avenue	1	100.0000	88101	PM2.5 - Local Conditions	17020	Chico, CA	06	California	007	Butte	39.76168	-121.84047
01/28/2014	AQS	060070008	1	22.1	ug/m3 LC	72	Chico-East Avenue	1	100.0000	88101	PM2.5 - Local Conditions	17020	Chico, CA	06	California	007	Butte	39.76168	-121.84047
01/29/2014	AQS	060070008	1	15.9	ug/m3 LC	59	Chico-East Avenue	1	100.0000	88101	PM2.5 - Local Conditions	17020	Chico, CA	06	California	007	Butte	39.76168	-121.84047
01/30/2014	AQS	060070008	1	14.8	ug/m3 LC	57	Chico-East Avenue	1	100.0000	88101	PM2.5 - Local Conditions	17020	Chico, CA	06	California	007	Butte	39.76168	-121.84047
01/31/2014	AQS	060070008	1	6	ug/m3 LC	25	Chico-East Avenue	1	100.0000	88101	PM2.5 - Local Conditions	17020	Chico, CA	06	California	007	Butte	39.76168	-121.84047
02/01/2014	AQS	060070008	1	5.3	ug/m3 LC	22	Chico-East Avenue	1	100.0000	88101	PM2.5 - Local Conditions	17020	Chico, CA	06	California	007	Butte	39.76168	-121.84047
02/02/2014	AQS	060070008	1	9.6	ug/m3 LC	40	Chico-East Avenue	1	100.0000	88101	PM2.5 - Local Conditions	17020	Chico, CA	06	California	007	Butte	39.76168	-121.84047
02/03/2014	AQS	060070008	1	9	ug/m3 LC	38	Chico-East Avenue	1	100.0000	88101	PM2.5 - Local Conditions	17020	Chico, CA	06	California	007	Butte	39.76168	-121.84047
02/04/2014	AQS	060070008	1	15.8	ug/m3 LC	59	Chico-East Avenue	1	100.0000	88101	PM2.5 - Local Conditions	17020	Chico, CA	06	California	007	Butte	39.76168	-121.84047
02/05/2014	AQS	060070008	1	14.5	ug/m3 LC	56	Chico-East Avenue	1	100.0000	88101	PM2.5 - Local Conditions	17020	Chico, CA	06	California	007	Butte	39.76168	-121.84047
02/06/2014	AQS	060070008	1	7.1	ug/m3 LC	30	Chico-East Avenue	1	100.0000	88101	PM2.5 - Local Conditions	17020	Chico, CA	06	California	007	Butte	39.76168	-121.84047
02/07/2014	AQS	060070008	1	4.4	ug/m3 LC	18	Chico-East Avenue	1	100.0000	88101	PM2.5 - Local Conditions	17020	Chico, CA	06	California	007	Butte	39.76168	-121.84047
02/08/2014	AQS	060070008	1	2	ug/m3 LC	8	Chico-East Avenue	1	100.0000	88101	PM2.5 - Local Conditions	17020	Chico, CA	06	California	007	Butte	39.76168	-121.84047
02/09/2014	AQS	060070008	1	2	ug/m3 LC	8	Chico-East Avenue	1	100.0000	88101	PM2.5 - Local Conditions	17020	Chico, CA	06	California	007	Butte	39.76168	-121.84047
02/10/2014	AQS	060070008	1	3.2	ug/m3 LC	13	Chico-East Avenue	1	100.0000	88101	PM2.5 - Local Conditions	17020	Chico, CA	06	California	007	Butte	39.76168	-121.84047
02/11/2014	AQS	060070008	1	7	ug/m3 LC	29	Chico-East Avenue	1	100.0000	88101	PM2.5 - Local Conditions	17020	Chico, CA	06	California	007	Butte	39.76168	-121.84047
02/12/2014	AQS	060070008	1	7.4	ug/m3 LC	31	Chico-East Avenue	1	100.0000	88101	PM2.5 - Local Conditions	17020	Chico, CA	06	California	007	Butte	39.76168	-121.84047
02/13/2014	AQS	060070008	1	9.4	ug/m3 LC	39	Chico-East Avenue	1	100.0000	88101	PM2.5 - Local Conditions	17020	Chico, CA	06	California	007	Butte	39.76168	-121.84047
02/14/2014	AQS	060070008	1	4.8	ug/m3 LC	20	Chico-East Avenue	1	100.0000	88101	PM2.5 - Local Conditions	17020	Chico, CA	06	California	007	Butte	39.76168	-121.84047
02/15/2014	AQS	060070008	1	4.3	ug/m3 LC	18	Chico-East Avenue	1	100.0000	88101	PM2.5 - Local Conditions	17020	Chico, CA	06	California	007	Butte	39.76168	-121.84047
02/16/2014	AQS	060070008	1	4.4	ug/m3 LC	18	Chico-East Avenue	1	100.0000	88101	PM2.5 - Local Conditions	17020	Chico, CA	06	California	007	Butte	39.76168	-121.84047
02/17/2014	AQS	060070008	1	7.4	ug/m3 LC	31	Chico-East Avenue	1	100.0000	88101	PM2.5 - Local Conditions	17020	Chico, CA	06	California	007	Butte	39.76168	-121.84047
02/18/2014	AQS	060070008	1	6.3	ug/m3 LC	26	Chico-East Avenue	1	100.0000	88101	PM2.5 - Local Conditions	17020	Chico, CA	06	California	007	Butte	39.76168	-121.84047
02/19/2014	AQS	060070008	1	3	ug/m3 LC	13	Chico-East Avenue	1	100.0000	88101	PM2.5 - Local Conditions	17020	Chico, CA	06	California	007	Butte	39.76168	-121.84047
02/20/2014	AQS	060070008	1	7.2	ug/m3 LC	30	Chico-East Avenue	1	100.0000	88101	PM2.5 - Local Conditions	17020	Chico, CA	06	California	007	Butte	39.76168	-121.84047
02/22/2014	AQS	060070008	1	7.8	ug/m3 LC	33	Chico-East Avenue	1	100.0000	88101	PM2.5 - Local Conditions	17020	Chico, CA	06	California	007	Butte	39.76168	-121.84047
02/23/2014	AQS	060070008	1	5.2	ug/m3 LC	22	Chico-East Avenue	1	100.0000	88101	PM2.5 - Local Conditions	17020	Chico, CA	06	California	007	Butte	39.76168	-121.84047
02/24/2014	AQS	060070008	1	6	ug/m3 LC	25	Chico-East Avenue	1	100.0000	88101	PM2.5 - Local Conditions	17020	Chico, CA	06	California	007	Butte	39.76168	-121.84047
02/25/2014	AQS	060070008	1	8.9	ug/m3 LC	37	Chico-East Avenue	1	100.0000	88101	PM2.5 - Local Conditions	17020	Chico, CA	06	California	007	Butte	39.76168	-121.84047
02/26/2014	AQS	060070008	1	8.1	ug/m3 LC	34	Chico-East Avenue	1	100.0000	88101	PM2.5 - Local Conditions	17020	Chico, CA	06	California	007	Butte	39.76168	-121.84047
02/27/2014	AQS	060070008	1	3.8	ug/m3 LC	16	Chico-East Avenue	1	100.0000	88101	PM2.5 - Local Conditions	17020	Chico, CA	06	California	007	Butte	39.76168	-121.84047
02/28/2014	AQS	060070008	1	3.5	ug/m3 LC	15	Chico-East Avenue	1	100.0000	88101	PM2.5 - Local Conditions	17020	Chico, CA	06	California	007	Butte	39.76168	-121.84047
03/01/2014	AQS	060070008	1	2.2	ug/m3 LC	9	Chico-East Avenue	1	100.0000	88101	PM2.5 - Local Conditions	17020	Chico, CA	06	California	007	Butte	39.76168	-121.84047
03/02/2014	AQS	060070008	1	2.6	ug/m3 LC	11	Chico-East Avenue	1	100.0000	88101	PM2.5 - Local Conditions	17020	Chico, CA	06	California	007	Butte	39.76168	-121.84047
03/03/2014	AQS	060070008	1	2.5	ug/m3 LC	10	Chico-East Avenue	1	100.0000	88101	PM2.5 - Local Conditions	17020	Chico, CA	06	California	007	Butte	39.76168	-121.84047
03/04/2014	AQS	060070008	1	3	ug/m3 LC	13	Chico-East Avenue	1	100.0000	88101	PM2.5 - Local Conditions	17020	Chico, CA	06	California	007	Butte	39.76168	-121.84047
03/05/2014	AQS	060070008	1	3.5	ug/m3 LC	15	Chico-East Avenue	1	100.0000	88101	PM2.5 - Local Conditions	17020	Chico, CA	06	California	007	Butte	39.76168	-121.84047
03/06/2014	AQS	060070008	1	3.7	ug/m3 LC	15	Chico-East Avenue	1	100.0000	88101	PM2.5 - Local Conditions	17020	Chico, CA	06	California	007	Butte	39.76168	-121.84047
03/07/2014	AQS	060070008	1	3.3	ug/m3 LC	14	Chico-East Avenue	1	100.0000	88101	PM2.5 - Local Conditions	17020	Chico, CA	06	California	007	Butte	39.76168	-121.84047
03/08/2014	AQS	060070008	1	5.3	ug/m3 LC	22	Chico-East Avenue	1	100.0000	88101	PM2.5 - Local Conditions	17020	Chico, CA	06	California	007	Butte	39.76168	-121.84047
03/09/2014	AQS	060070008	1	6.7	ug/m3 LC	28	Chico-East Avenue	1	100.0000	88101	PM2.5 - Local Conditions	17020	Chico, CA	06	California	007	Butte	39.76168	-121.84047
03/10/2014	AQS	060070008	1	1	ug/m3 LC	4	Chico-East Avenue	1	100.0000	88101	PM2.5 - Local Conditions	17020	Chico, CA	06	California	007	Butte	39.76168	-121.84047
03/11/2014	AQS	060070008	1	1	ug/m3 LC	4	Chico-East Avenue	1	100.0000	88101	PM2.5 - Local Conditions	17020	Chico, CA	06	California	007	Butte	39.76168	-121.84047
03/12/2014	AQS	060070008	1	2	ug/m3 LC	8	Chico-East Avenue	1	100.0000	88101	PM2.5 - Local Conditions	17020	Chico, CA	06	California	007	Butte	39.76168	-121.84047
03/13/2014	AQS	060070008	1	3.1	ug/m3 LC	13	Chico-East Avenue	1	100.0000	88101	PM2.5 - Local Conditions	17020	Chico, CA	06	California	007	Butte	39.76168	-121.84047
03/14/2014	AQS	060070008	1	4.6	ug/m3 LC	19	Chico-East Avenue	1	100.0000	88101	PM2.5 - Local Conditions	17020	Chico, CA	06	California	007	Butte	39.76168	-121.84047
03/15/2014	AQS	060070008	1	5.5	ug/m3 LC	23	Chico-East Avenue	1	100.0000	88101	PM2.5 - Local Conditions	17020	Chico, CA	06	California	007	Butte	39.76168	-121.84047
03/16/2014	AQS	060070008	1	6.1	ug/m3 LC	25	Chico-East Avenue	1	100.0000	88101	PM2.5 - Local Conditions	17020	Chico, CA	06	California	007	Butte	39.76168	-121.84047
03/17/2014	AQS	060070008	1	2.1	ug/m3 LC	9	Chico-East Avenue	1	100.0000	88101	PM2.5 - Local Conditions	17020	Chico, CA	06	California	007	Butte	39.76168	-121.84047
03/18/2014	AQS	060070008	1	1	ug/m3 LC	4	Chico-East Avenue	1	100.0000	88101	PM2.5 - Local Conditions	17020	Chico, CA	06	California	007	Butte	39.76168	-121.84047
03/19/2014	AQS	060070008	1	4	ug/m3 LC	17	Chico-East Avenue	1	100.0000	88101	PM2.5 - Local Conditions	17020	Chico, CA	06	California	007	Butte	39.76168	-121.84047
03/20/2014	AQS	060070008	1	4.5	ug/m3 LC	19	Chico-East Avenue	1	100.0000	88101	PM2.5 - Local Conditions	17020	Chico, CA	06	California	007	Butte	39.76168	-121.84047
03/21/2014	AQS	060070008	1	4.8	ug/m3 LC	20	Chico-East Avenue	1	100.0000	88101	PM2.5 - Local Conditions	17020	Chico, CA	06	California	007	Butte	39.76168	-121.84047
03/22/2014	AQS	060070008	1	5	ug/m3 LC	21	Chico-East Avenue	1	100.0000	88101	PM2.5 - Local Conditions	17020	Chico, CA	06	California	007	Butte	39.76168	-121.84047
03/23/2014	AQS	060070008	1	6.8	ug/m3 LC	28	Chico-East Avenue	1	100.0000	88101	PM2.5 - Local Conditions	17020	Chico, CA	06	California	007	Butte	39.76168	-121.84047
03/24/2014	AQS	060070008	1	11	ug/m3 LC	46	Chico-East Avenue	1	100.0000	88101	PM2.5 - Local Conditions	17020	Chico, CA	06	California	007	Butte	39.76168	-121.84047
03/25/2014	AQS	060070008	1	8.4	ug/m3 LC	35	Chico-East Avenue	1	100.0000	88101	PM2.5 - Local Conditions	17020	Chico, CA	06	California	007	Butte	39.76168	-121.84047
03/26/2014	AQS	060070008	1	3.3	ug/m3 LC	14	Chico-East Avenue	1	100.0000	88101	PM2.5 - Local Conditions	17020	Chico, CA	06	California	007	Butte	39.76168	-121.84047
03/27/2014	AQS	060070008	1	5	ug/m3 LC	21	Chico-East Avenue	1	100.0000	88101	PM2.5 - Local Conditions	17020	Chico, CA	06	California	007	Butte	39.76168	-121.84047
03/28/2014	AQS	060070008	1	4.5	ug/m3 LC	19	Chico-East Avenue	1	100.0000	88101	PM2.5 - Local Conditions	17020	Chico, CA	06	California	007	Butte	39.76168	-121.84047
03/29/2014	AQS	060070008	1	2.3	ug/m3 LC	10	Chico-East Avenue	1	100.0000	88101	PM2.5 - Local Conditions	17020	Chico, CA	06	California	007	Butte	39.76168	-121.84047
03/30/2014	AQS	060070008	1	2.5	ug/m3 LC	10	Chico-East Avenue	1	100.0000	88101	PM2.5 - Local Conditions	17020	Chico, CA	06	California	007	Butte	39.76168	-121.84047
03/31/2014	AQS	060070008	1	3.3	ug/m3 LC	14	Chico-East Avenue	1	100.0000	88101	PM2.5 - Local Conditions	17020	Chico, CA	06	California	007	Butte	39.76168	-121.84047
04/01/2014	AQS	060070008	1	2.4	ug/m3 LC	10	Chico-East Avenue	1	100.0000	88101	PM2.5 - Local Conditions	17020	Chico, CA	06	California	007	Butte	39.76168	-121.84047
04/02/2014	AQS	060070008	1	2.6	ug/m3 LC	11	Chico-East Avenue	1	100.0000	88101	PM2.5 - Local Conditions	17020	Chico, CA	06	California	007	Butte	39.76168	-121.84047
04/03/2014	AQS	060070008	1	4	ug/m3 LC	17	Chico-East Avenue	1	100.0000	88101	PM2.5 - Local Conditions	17020	Chico, CA	06	California	007	Butte	39.76168	-121.84047
04/04/2014	AQS	060070008	1	4.4	ug/m3 LC	18	Chico-East Avenue	1	100.0000	88101	PM2.5 - Local Conditions	17020	Chico, CA	06	California	007	Butte	39.76168	-121.84047
04/05/2014	AQS	060070008	1	4.4	ug/m3 LC	18	Chico-East Avenue	1	100.0000	88101	PM2.5 - Local Conditions	17020	Chico, CA	06	California	007	Butte	39.76168	-121.84047
04/06/2014	AQS	060070008	1	4.5	ug/m3 LC	19	Chico-East Avenue	1	100.0000	88101	PM2.5 - Local Conditions	17020	Chico, CA	06	California	007	Butte	39.76168	-121.84047
04/07/2014	AQS	060070008	1	7.5	ug/m3 LC	31	Chico-East Avenue	1	100.0000	88101	PM2.5 - Local Conditions	17020	Chico, CA	06	California	007	Butte	39.76168	-121.84047
04/08/2014	AQS	060070008	1	8.6	ug/m3 LC	36	Chico-East Avenue	1	100.0000	88101	PM2.5 - Local Conditions	17020	Chico, CA	06	California	007	Butte	39.76168	-121.84047
04/09/2014	AQS	060070008	1	8.1	ug/m3 LC	34	Chico-East Avenue	1	100.0000	88101	PM2.5 - Local Conditions	17020	Chico, CA	06	California	007	Butte	39.76168	-121.84047
04/10/2014	AQS	060070008	1	7	ug/m3 LC	29	Chico-East Avenue	1	100.0000	88101	PM2.5 - Local Conditions	17020	Chico, CA	06	California	007	Butte	39.76168	-121.84047
04/11/2014	AQS	060070008	1	6.8	ug/m3 LC	28	Chico-East Avenue	1	100.0000	88101	PM2.5 - Local Conditions	17020	Chico, CA	06	California	007	Butte	39.76168	-121.84047
04/12/2014	AQS	060070008	1	10.7	ug/m3 LC	45	Chico-East Avenue	1	100.0000	88101	PM2.5 - Local Conditions	17020	Chico, CA	06	California	007	Butte	39.76168	-121.84047
04/13/2014	AQS	060070008	1	5.1	ug/m3 LC	21	Chico-East Avenue	1	100.0000	88101	PM2.5 - Local Conditions	17020	Chico, CA	06	California	007	Butte	39.76168	-121.84047
04/14/2014	AQS	060070008	1	6.1	ug/m3 LC	25	Chico-East Avenue	1	100.0000	88101	PM2.5 - Local Conditions	17020	Chico, CA	06	California	007	Butte	39.76168	-121.84047
04/15/2014	AQS	060070008	1	6.5	ug/m3 LC	27	Chico-East Avenue	1	100.0000	88101	PM2.5 - Local Conditions	17020	Chico, CA	06	California	007	Butte	39.76168	-121.84047
04/16/2014	AQS	060070008	1	3.9	ug/m3 LC	16	Chico-East Avenue	1	100.0000	88101	PM2.5 - Local Conditions	17020	Chico, CA	06	California	007	Butte	39.76168	-121.84047
04/17/2014	AQS	060070008	1	6	ug/m3 LC	25	Chico-East Avenue	1	100.0000	88101	PM2.5 - Local Conditions	17020	Chico, CA	06	California	007	Butte	39.76168	-121.84047
04/18/2014	AQS	060070008	1	3.7	ug/m3 LC	15	Chico-East Avenue	1	100.0000	88101	PM2.5 - Local Conditions	17020	Chico, CA	06	California	007	Butte	39.76168	-121.84047
04/19/2014	AQS	060070008	1	6.8	ug/m3 LC	28	Chico-East Avenue	1	100.0000	88101	PM2.5 - Local Conditions	17020	Chico, CA	06	California	007	Butte	39.76168	-121.84047
04/22/2014	AQS	060070008	1	2.5	ug/m3 LC	10	Chico-East Avenue	1	100.0000	88101	PM2.5 - Local Conditions	17020	Chico, CA	06	California	007	Butte	39.76168	-121.84047
04/23/2014	AQS	060070008	1	1	ug/m3 LC	4	Chico-East Avenue	1	100.0000	88101	PM2.5 - Local Conditions	17020	Chico, CA	06	California	007	Butte	39.76168	-121.84047
04/24/2014	AQS	060070008	1	4.2	ug/m3 LC	18	Chico-East Avenue	1	100.0000	88101	PM2.5 - Local Conditions	17020	Chico, CA	06	California	007	Butte	39.76168	-121.84047
04/25/2014	AQS	060070008	1	2	ug/m3 LC	8	Chico-East Avenue	1	100.0000	88101	PM2.5 - Local Conditions	17020	Chico, CA	06	California	007	Butte	39.76168	-121.84047
04/27/2014	AQS	060070008	1	2.7	ug/m3 LC	11	Chico-East Avenue	1	100.0000	88101	PM2.5 - Local Conditions	17020	Chico, CA	06	California	007	Butte	39.76168	-121.84047
04/28/2014	AQS	060070008	1	4	ug/m3 LC	17	Chico-East Avenue	1	100.0000	88101	PM2.5 - Local Conditions	17020	Chico, CA	06	California	007	Butte	39.76168	-121.84047
04/29/2014	AQS	060070008	1	4	ug/m3 LC	17	Chico-East Avenue	1	100.0000	88101	PM2.5 - Local Conditions	17020	Chico, CA	06	California	007	Butte	39.76168	-121.84047
04/30/2014	AQS	060070008	1	4.6	ug/m3 LC	19	Chico-East Avenue	1	100.0000	88101	PM2.5 - Local Conditions	17020	Chico, CA	06	California	007	Butte	39.76168	-121.84047
05/01/2014	AQS	060070008	1	6.7	ug/m3 LC	28	Chico-East Avenue	1	100.0000	88101	PM2.5 - Local Conditions	17020	Chico, CA	06	California	007	Butte	39.76168	-121.84047
05/02/2014	AQS	060070008	1	8	ug/m3 LC	33	Chico-East Avenue	1	100.0000	88101	PM2.5 - Local Conditions	17020	Chico, CA	06	California	007	Butte	39.76168	-121.84047
05/03/2014	AQS	060070008	1	5.1	ug/m3 LC	21	Chico-East Avenue	1	100.0000	88101	PM2.5 - Local Conditions	17020	Chico, CA	06	California	007	Butte	39.76168	-121.84047
05/04/2014	AQS	060070008	1	3.8	ug/m3 LC	16	Chico-East Avenue	1	100.0000	88101	PM2.5 - Local Conditions	17020	Chico, CA	06	California	007	Butte	39.76168	-121.84047
05/05/2014	AQS	060070008	1	2.8	ug/m3 LC	12	Chico-East Avenue	1	100.0000	88101	PM2.5 - Local Conditions	17020	Chico, CA	06	California	007	Butte	39.76168	-121.84047
05/06/2014	AQS	060070008	1	3.1	ug/m3 LC	13	Chico-East Avenue	1	100.0000	88101	PM2.5 - Local Conditions	17020	Chico, CA	06	California	007	Butte	39.76168	-121.84047
05/07/2014	AQS	060070008	1	4.8	ug/m3 LC	20	Chico-East Avenue	1	100.0000	88101	PM2.5 - Local Conditions	17020	Chico, CA	06	California	007	Butte	39.76168	-121.84047
05/08/2014	AQS	060070008	1	6	ug/m3 LC	25	Chico-East Avenue	1	100.0000	88101	PM2.5 - Local Conditions	17020	Chico, CA	06	California	007	Butte	39.76168	-121.84047
05/09/2014	AQS	060070008	1	2.7	ug/m3 LC	11	Chico-East Avenue	1	100.0000	88101	PM2.5 - Local Conditions	17020	Chico, CA	06	California	007	Butte	39.76168	-121.84047
05/10/2014	AQS	060070008	1	2	ug/m3 LC	8	Chico-East Avenue	1	100.0000	88101	PM2.5 - Local Conditions	17020	Chico, CA	06	California	007	Butte	39.76168	-121.84047
05/11/2014	AQS	060070008	1	3	ug/m3 LC	13	Chico-East Avenue	1	100.0000	88101	PM2.5 - Local Conditions	17020	Chico, CA	06	California	007	Butte	39.76168	-121.84047
05/12/2014	AQS	060070008	1	6.7	ug/m3 LC	28	Chico-East Avenue	1	100.0000	88101	PM2.5 - Local Conditions	17020	Chico, CA	06	California	007	Butte	39.76168	-121.84047
05/13/2014	AQS	060070008	1	9.5	ug/m3 LC	40	Chico-East Avenue	1	100.0000	88101	PM2.5 - Local Conditions	17020	Chico, CA	06	California	007	Butte	39.76168	-121.84047
05/14/2014	AQS	060070008	1	8.8	ug/m3 LC	37	Chico-East Avenue	1	100.0000	88101	PM2.5 - Local Conditions	17020	Chico, CA	06	California	007	Butte	39.76168	-121.84047
05/15/2014	AQS	060070008	1	10.3	ug/m3 LC	43	Chico-East Avenue	1	100.0000	88101	PM2.5 - Local Conditions	17020	Chico, CA	06	California	007	Butte	39.76168	-121.84047
05/16/2014	AQS	060070008	1	10.2	ug/m3 LC	43	Chico-East Avenue	1	100.0000	88101	PM2.5 - Local Conditions	17020	Chico, CA	06	California	007	Butte	39.76168	-121.84047
05/17/2014	AQS	060070008	1	10.4	ug/m3 LC	43	Chico-East Avenue	1	100.0000	88101	PM2.5 - Local Conditions	17020	Chico, CA	06	California	007	Butte	39.76168	-121.84047
05/18/2014	AQS	060070008	1	6.4	ug/m3 LC	27	Chico-East Avenue	1	100.0000	88101	PM2.5 - Local Conditions	17020	Chico, CA	06	California	007	Butte	39.76168	-121.84047
05/19/2014	AQS	060070008	1	5.5	ug/m3 LC	23	Chico-East Avenue	1	100.0000	88101	PM2.5 - Local Conditions	17020	Chico, CA	06	California	007	Butte	39.76168	-121.84047
05/20/2014	AQS	060070008	1	4.3	ug/m3 LC	18	Chico-East Avenue	1	100.0000	88101	PM2.5 - Local Conditions	17020	Chico, CA	06	California	007	Butte	39.76168	-121.84047
05/21/2014	AQS	060070008	1	5.6	ug/m3 LC	23	Chico-East Avenue	1	100.0000	88101	PM2.5 - Local Conditions	17020	Chico, CA	06	California	007	Butte	39.76168	-121.84047
05/22/2014	AQS	060070008	1	20.4	ug/m3 LC	68	Chico-East Avenue	1	100.0000	88101	PM2.5 - Local Conditions	17020	Chico, CA	06	California	007	Butte	39.76168	-121.84047
05/23/2014	AQS	060070008	1	7.7	ug/m3 LC	32	Chico-East Avenue	1	100.0000	88101	PM2.5 - Local Conditions	17020	Chico, CA	06	California	007	Butte	39.76168	-121.84047
05/24/2014	AQS	060070008	1	6.7	ug/m3 LC	28	Chico-East Avenue	1	100.0000	88101	PM2.5 - Local Conditions	17020	Chico, CA	06	California	007	Butte	39.76168	-121.84047
05/25/2014	AQS	060070008	1	10.2	ug/m3 LC	43	Chico-East Avenue	1	100.0000	88101	PM2.5 - Local Conditions	17020	Chico, CA	06	California	007	Butte	39.76168	-121.84047
05/26/2014	AQS	060070008	1	5.8	ug/m3 LC	24	Chico-East Avenue	1	100.0000	88101	PM2.5 - Local Conditions	17020	Chico, CA	06	California	007	Butte	39.76168	-121.84047
05/27/2014	AQS	060070008	1	7.4	ug/m3 LC	31	Chico-East Avenue	1	100.0000	88101	PM2.5 - Local Conditions	17020	Chico, CA	06	California	007	Butte	39.76168	-121.84047
05/28/2014	AQS	060070008	1	2.9	ug/m3 LC	12	Chico-East Avenue	1	100.0000	88101	PM2.5 - Local Conditions	17020	Chico, CA	06	California	007	Butte	39.76168	-121.84047
05/29/2014	AQS	060070008	1	2.8	ug/m3 LC	12	Chico-East Avenue	1	100.0000	88101	PM2.5 - Local Conditions	17020	Chico, CA	06	California	007	Butte	39.76168	-121.84047
05/30/2014	AQS	060070008	1	5.8	ug/m3 LC	24	Chico-East Avenue	1	100.0000	88101	PM2.5 - Local Conditions	17020	Chico, CA	06	California	007	Butte	39.76168	-121.84047
05/31/2014	AQS	060070008	1	11.7	ug/m3 LC	49	Chico-East Avenue	1	100.0000	88101	PM2.5 - Local Conditions	17020	Chico, CA	06	California	007	Butte	39.76168	-121.84047
06/01/2014	AQS	060070008	1	15.5	ug/m3 LC	58	Chico-East Avenue	1	100.0000	88101	PM2.5 - Local Conditions	17020	Chico, CA	06	California	007	Butte	39.76168	-121.84047
06/02/2014	AQS	060070008	1	16.1	ug/m3 LC	59	Chico-East Avenue	1	100.0000	88101	PM2.5 - Local Conditions	17020	Chico, CA	06	California	007	Butte	39.76168	-121.84047
06/03/2014	AQS	060070008	1	10.4	ug/m3 LC	43	Chico-East Avenue	1	100.0000	88101	PM2.5 - Local Conditions	17020	Chico, CA	06	California	007	Butte	39.76168	-121.84047
06/04/2014	AQS	060070008	1	7.7	ug/m3 LC	32	Chico-East Avenue	1	100.0000	88101	PM2.5 - Local Conditions	17020	Chico, CA	06	California	007	Butte	39.76168	-121.84047
06/05/2014	AQS	060070008	1	10.9	ug/m3 LC	45	Chico-East Avenue	1	100.0000	88101	PM2.5 - Local Conditions	17020	Chico, CA	06	California	007	Butte	39.76168	-121.84047
06/06/2014	AQS	060070008	1	17.8	ug/m3 LC	63	Chico-East Avenue	1	100.0000	88101	PM2.5 - Local Conditions	17020	Chico, CA	06	California	007	Butte	39.76168	-121.84047
06/07/2014	AQS	060070008	1	11.7	ug/m3 LC	49	Chico-East Avenue	1	100.0000	88101	PM2.5 - Local Conditions	17020	Chico, CA	06	California	007	Butte	39.76168	-121.84047
06/08/2014	AQS	060070008	1	13	ug/m3 LC	53	Chico-East Avenue	1	100.0000	88101	PM2.5 - Local Conditions	17020	Chico, CA	06	California	007	Butte	39.76168	-121.84047
06/09/2014	AQS	060070008	1	9.8	ug/m3 LC	41	Chico-East Avenue	1	100.0000	88101	PM2.5 - Local Conditions	17020	Chico, CA	06	California	007	Butte	39.76168	-121.84047
06/10/2014	AQS	060070008	1	10	ug/m3 LC	42	Chico-East Avenue	1	100.0000	88101	PM2.5 - Local Conditions	17020	Chico, CA	06	California	007	Butte	39.76168	-121.84047
06/11/2014	AQS	060070008	1	11.5	ug/m3 LC	48	Chico-East Avenue	1	100.0000	88101	PM2.5 - Local Conditions	17020	Chico, CA	06	California	007	Butte	39.76168	-121.84047
06/12/2014	AQS	060070008	1	10.7	ug/m3 LC	45	Chico-East Avenue	1	100.0000	88101	PM2.5 - Local Conditions	17020	Chico, CA	06	California	007	Butte	39.76168	-121.84047
06/13/2014	AQS	060070008	1	10.5	ug/m3 LC	44	Chico-East Avenue	1	100.0000	88101	PM2.5 - Local Conditions	17020	Chico, CA	06	California	007	Butte	39.76168	-121.84047
06/14/2014	AQS	060070008	1	4.9	ug/m3 LC	20	Chico-East Avenue	1	100.0000	88101	PM2.5 - Local Conditions	17020	Chico, CA	06	California	007	Butte	39.76168	-121.84047
06/15/2014	AQS	060070008	1	7.9	ug/m3 LC	33	Chico-East Avenue	1	100.0000	88101	PM2.5 - Local Conditions	17020	Chico, CA	06	California	007	Butte	39.76168	-121.84047
06/16/2014	AQS	060070008	1	11.7	ug/m3 LC	49	Chico-East Avenue	1	100.0000	88101	PM2.5 - Local Conditions	17020	Chico, CA	06	California	007	Butte	39.76168	-121.84047
06/17/2014	AQS	060070008	1	3.3	ug/m3 LC	14	Chico-East Avenue	1	100.0000	88101	PM2.5 - Local Conditions	17020	Chico, CA	06	California	007	Butte	39.76168	-121.84047
06/18/2014	AQS	060070008	1	4.2	ug/m3 LC	18	Chico-East Avenue	1	100.0000	88101	PM2.5 - Local Conditions	17020	Chico, CA	06	California	007	Butte	39.76168	-121.84047
06/19/2014	AQS	060070008	1	7.8	ug/m3 LC	33	Chico-East Avenue	1	100.0000	88101	PM2.5 - Local Conditions	17020	Chico, CA	06	California	007	Butte	39.76168	-121.84047
06/20/2014	AQS	060070008	1	7.1	ug/m3 LC	30	Chico-East Avenue	1	100.0000	88101	PM2.5 - Local Conditions	17020	Chico, CA	06	California	007	Butte	39.76168	-121.84047
06/21/2014	AQS	060070008	1	10.9	ug/m3 LC	45	Chico-East Avenue	1	100.0000	88101	PM2.5 - Local Conditions	17020	Chico, CA	06	California	007	Butte	39.76168	-121.84047
06/22/2014	AQS	060070008	1	14.5	ug/m3 LC	56	Chico-East Avenue	1	100.0000	88101	PM2.5 - Local Conditions	17020	Chico, CA	06	California	007	Butte	39.76168	-121.84047
06/23/2014	AQS	060070008	1	10.8	ug/m3 LC	45	Chico-East Avenue	1	100.0000	88101	PM2.5 - Local Conditions	17020	Chico, CA	06	California	007	Butte	39.76168	-121.84047
06/24/2014	AQS	060070008	1	13	ug/m3 LC	53	Chico-East Avenue	1	100.0000	88101	PM2.5 - Local Conditions	17020	Chico, CA	06	California	007	Butte	39.76168	-121.84047
06/25/2014	AQS	060070008	1	9.7	ug/m3 LC	40	Chico-East Avenue	1	100.0000	88101	PM2.5 - Local Conditions	17020	Chico, CA	06	California	007	Butte	39.76168	-121.84047
06/26/2014	AQS	060070008	1	4.5	ug/m3 LC	19	Chico-East Avenue	1	100.0000	88101	PM2.5 - Local Conditions	17020	Chico, CA	06	California	007	Butte	39.76168	-121.84047
06/27/2014	AQS	060070008	1	3	ug/m3 LC	13	Chico-East Avenue	1	100.0000	88101	PM2.5 - Local Conditions	17020	Chico, CA	06	California	007	Butte	39.76168	-121.84047
06/28/2014	AQS	060070008	1	3.4	ug/m3 LC	14	Chico-East Avenue	1	100.0000	88101	PM2.5 - Local Conditions	17020	Chico, CA	06	California	007	Butte	39.76168	-121.84047
06/29/2014	AQS	060070008	1	3.7	ug/m3 LC	15	Chico-East Avenue	1	100.0000	88101	PM2.5 - Local Conditions	17020	Chico, CA	06	California	007	Butte	39.76168	-121.84047
06/30/2014	AQS	060070008	1	4.3	ug/m3 LC	18	Chico-East Avenue	1	100.0000	88101	PM2.5 - Local Conditions	17020	Chico, CA	06	California	007	Butte	39.76168	-121.84047
07/01/2014	AQS	060070008	1	9.3	ug/m3 LC	39	Chico-East Avenue	1	100.0000	88101	PM2.5 - Local Conditions	17020	Chico, CA	06	California	007	Butte	39.76168	-121.84047
07/02/2014	AQS	060070008	1	7.8	ug/m3 LC	33	Chico-East Avenue	1	100.0000	88101	PM2.5 - Local Conditions	17020	Chico, CA	06	California	007	Butte	39.76168	-121.84047
07/03/2014	AQS	060070008	1	10.9	ug/m3 LC	45	Chico-East Avenue	1	100.0000	88101	PM2.5 - Local Conditions	17020	Chico, CA	06	California	007	Butte	39.76168	-121.84047
07/11/2014	AQS	060070008	1	4.7	ug/m3 LC	20	Chico-East Avenue	1	100.0000	88101	PM2.5 - Local Conditions	17020	Chico, CA	06	California	007	Butte	39.76168	-121.84047
07/12/2014	AQS	060070008	1	5.5	ug/m3 LC	23	Chico-East Avenue	1	100.0000	88101	PM2.5 - Local Conditions	17020	Chico, CA	06	California	007	Butte	39.76168	-121.84047
07/13/2014	AQS	060070008	1	6	ug/m3 LC	25	Chico-East Avenue	1	100.0000	88101	PM2.5 - Local Conditions	17020	Chico, CA	06	California	007	Butte	39.76168	-121.84047
07/14/2014	AQS	060070008	1	10.8	ug/m3 LC	45	Chico-East Avenue	1	100.0000	88101	PM2.5 - Local Conditions	17020	Chico, CA	06	California	007	Butte	39.76168	-121.84047
07/15/2014	AQS	060070008	1	9.9	ug/m3 LC	41	Chico-East Avenue	1	100.0000	88101	PM2.5 - Local Conditions	17020	Chico, CA	06	California	007	Butte	39.76168	-121.84047
07/16/2014	AQS	060070008	1	7.3	ug/m3 LC	30	Chico-East Avenue	1	100.0000	88101	PM2.5 - Local Conditions	17020	Chico, CA	06	California	007	Butte	39.76168	-121.84047
07/17/2014	AQS	060070008	1	5.8	ug/m3 LC	24	Chico-East Avenue	1	100.0000	88101	PM2.5 - Local Conditions	17020	Chico, CA	06	California	007	Butte	39.76168	-121.84047
07/18/2014	AQS	060070008	1	6.7	ug/m3 LC	28	Chico-East Avenue	1	100.0000	88101	PM2.5 - Local Conditions	17020	Chico, CA	06	California	007	Butte	39.76168	-121.84047
07/19/2014	AQS	060070008	1	5.4	ug/m3 LC	23	Chico-East Avenue	1	100.0000	88101	PM2.5 - Local Conditions	17020	Chico, CA	06	California	007	Butte	39.76168	-121.84047
07/20/2014	AQS	060070008	1	5.8	ug/m3 LC	24	Chico-East Avenue	1	100.0000	88101	PM2.5 - Local Conditions	17020	Chico, CA	06	California	007	Butte	39.76168	-121.84047
07/21/2014	AQS	060070008	1	4.6	ug/m3 LC	19	Chico-East Avenue	1	100.0000	88101	PM2.5 - Local Conditions	17020	Chico, CA	06	California	007	Butte	39.76168	-121.84047
07/22/2014	AQS	060070008	1	4	ug/m3 LC	17	Chico-East Avenue	1	100.0000	88101	PM2.5 - Local Conditions	17020	Chico, CA	06	California	007	Butte	39.76168	-121.84047
07/23/2014	AQS	060070008	1	2.1	ug/m3 LC	9	Chico-East Avenue	1	100.0000	88101	PM2.5 - Local Conditions	17020	Chico, CA	06	California	007	Butte	39.76168	-121.84047
07/24/2014	AQS	060070008	1	3.2	ug/m3 LC	13	Chico-East Avenue	1	100.0000	88101	PM2.5 - Local Conditions	17020	Chico, CA	06	California	007	Butte	39.76168	-121.84047
07/25/2014	AQS	060070008	1	3.8	ug/m3 LC	16	Chico-East Avenue	1	100.0000	88101	PM2.5 - Local Conditions	17020	Chico, CA	06	California	007	Butte	39.76168	-121.84047
07/26/2014	AQS	060070008	1	5.7	ug/m3 LC	24	Chico-East Avenue	1	100.0000	88101	PM2.5 - Local Conditions	17020	Chico, CA	06	California	007	Butte	39.76168	-121.84047
07/27/2014	AQS	060070008	1	10.4	ug/m3 LC	43	Chico-East Avenue	1	100.0000	88101	PM2.5 - Local Conditions	17020	Chico, CA	06	California	007	Butte	39.76168	-121.84047
07/28/2014	AQS	060070008	1	9.4	ug/m3 LC	39	Chico-East Avenue	1	100.0000	88101	PM2.5 - Local Conditions	17020	Chico, CA	06	California	007	Butte	39.76168	-121.84047
07/29/2014	AQS	060070008	1	14.2	ug/m3 LC	55	Chico-East Avenue	1	100.0000	88101	PM2.5 - Local Conditions	17020	Chico, CA	06	California	007	Butte	39.76168	-121.84047
07/30/2014	AQS	060070008	1	26.8	ug/m3 LC	82	Chico-East Avenue	1	100.0000	88101	PM2.5 - Local Conditions	17020	Chico, CA	06	California	007	Butte	39.76168	-121.84047
07/31/2014	AQS	060070008	1	10	ug/m3 LC	42	Chico-East Avenue	1	100.0000	88101	PM2.5 - Local Conditions	17020	Chico, CA	06	California	007	Butte	39.76168	-121.84047
08/01/2014	AQS	060070008	1	7.4	ug/m3 LC	31	Chico-East Avenue	1	100.0000	88101	PM2.5 - Local Conditions	17020	Chico, CA	06	California	007	Butte	39.76168	-121.84047
08/02/2014	AQS	060070008	1	6.8	ug/m3 LC	28	Chico-East Avenue	1	100.0000	88101	PM2.5 - Local Conditions	17020	Chico, CA	06	California	007	Butte	39.76168	-121.84047
08/03/2014	AQS	060070008	1	13.9	ug/m3 LC	55	Chico-East Avenue	1	100.0000	88101	PM2.5 - Local Conditions	17020	Chico, CA	06	California	007	Butte	39.76168	-121.84047
08/04/2014	AQS	060070008	1	9.4	ug/m3 LC	39	Chico-East Avenue	1	100.0000	88101	PM2.5 - Local Conditions	17020	Chico, CA	06	California	007	Butte	39.76168	-121.84047
08/05/2014	AQS	060070008	1	11.4	ug/m3 LC	48	Chico-East Avenue	1	100.0000	88101	PM2.5 - Local Conditions	17020	Chico, CA	06	California	007	Butte	39.76168	-121.84047
08/06/2014	AQS	060070008	1	22	ug/m3 LC	72	Chico-East Avenue	1	100.0000	88101	PM2.5 - Local Conditions	17020	Chico, CA	06	California	007	Butte	39.76168	-121.84047
08/07/2014	AQS	060070008	1	22	ug/m3 LC	72	Chico-East Avenue	1	100.0000	88101	PM2.5 - Local Conditions	17020	Chico, CA	06	California	007	Butte	39.76168	-121.84047
08/08/2014	AQS	060070008	1	14	ug/m3 LC	55	Chico-East Avenue	1	100.0000	88101	PM2.5 - Local Conditions	17020	Chico, CA	06	California	007	Butte	39.76168	-121.84047
08/09/2014	AQS	060070008	1	15.8	ug/m3 LC	59	Chico-East Avenue	1	100.0000	88101	PM2.5 - Local Conditions	17020	Chico, CA	06	California	007	Butte	39.76168	-121.84047
08/10/2014	AQS	060070008	1	11.5	ug/m3 LC	48	Chico-East Avenue	1	100.0000	88101	PM2.5 - Local Conditions	17020	Chico, CA	06	California	007	Butte	39.76168	-121.84047
08/11/2014	AQS	060070008	1	8.8	ug/m3 LC	37	Chico-East Avenue	1	100.0000	88101	PM2.5 - Local Conditions	17020	Chico, CA	06	California	007	Butte	39.76168	-121.84047
08/12/2014	AQS	060070008	1	6.5	ug/m3 LC	27	Chico-East Avenue	1	100.0000	88101	PM2.5 - Local Conditions	17020	Chico, CA	06	California	007	Butte	39.76168	-121.84047
08/13/2014	AQS	060070008	1	6	ug/m3 LC	25	Chico-East Avenue	1	100.0000	88101	PM2.5 - Local Conditions	17020	Chico, CA	06	California	007	Butte	39.76168	-121.84047
08/14/2014	AQS	060070008	1	4	ug/m3 LC	17	Chico-East Avenue	1	100.0000	88101	PM2.5 - Local Conditions	17020	Chico, CA	06	California	007	Butte	39.76168	-121.84047
08/15/2014	AQS	060070008	1	6.1	ug/m3 LC	25	Chico-East Avenue	1	100.0000	88101	PM2.5 - Local Conditions	17020	Chico, CA	06	California	007	Butte	39.76168	-121.84047
08/16/2014	AQS	060070008	1	6.1	ug/m3 LC	25	Chico-East Avenue	1	100.0000	88101	PM2.5 - Local Conditions	17020	Chico, CA	06	California	007	Butte	39.76168	-121.84047
08/17/2014	AQS	060070008	1	4.8	ug/m3 LC	20	Chico-East Avenue	1	100.0000	88101	PM2.5 - Local Conditions	17020	Chico, CA	06	California	007	Butte	39.76168	-121.84047
08/18/2014	AQS	060070008	1	6	ug/m3 LC	25	Chico-East Avenue	1	100.0000	88101	PM2.5 - Local Conditions	17020	Chico, CA	06	California	007	Butte	39.76168	-121.84047
08/20/2014	AQS	060070008	1	6.1	ug/m3 LC	25	Chico-East Avenue	1	100.0000	88101	PM2.5 - Local Conditions	17020	Chico, CA	06	California	007	Butte	39.76168	-121.84047
08/21/2014	AQS	060070008	1	7.3	ug/m3 LC	30	Chico-East Avenue	1	100.0000	88101	PM2.5 - Local Conditions	17020	Chico, CA	06	California	007	Butte	39.76168	-121.84047
08/22/2014	AQS	060070008	1	7	ug/m3 LC	29	Chico-East Avenue	1	100.0000	88101	PM2.5 - Local Conditions	17020	Chico, CA	06	California	007	Butte	39.76168	-121.84047
08/23/2014	AQS	060070008	1	6.8	ug/m3 LC	28	Chico-East Avenue	1	100.0000	88101	PM2.5 - Local Conditions	17020	Chico, CA	06	California	007	Butte	39.76168	-121.84047
08/24/2014	AQS	060070008	1	6.3	ug/m3 LC	26	Chico-East Avenue	1	100.0000	88101	PM2.5 - Local Conditions	17020	Chico, CA	06	California	007	Butte	39.76168	-121.84047
08/25/2014	AQS	060070008	1	8	ug/m3 LC	33	Chico-East Avenue	1	100.0000	88101	PM2.5 - Local Conditions	17020	Chico, CA	06	California	007	Butte	39.76168	-121.84047
08/26/2014	AQS	060070008	1	8.2	ug/m3 LC	34	Chico-East Avenue	1	100.0000	88101	PM2.5 - Local Conditions	17020	Chico, CA	06	California	007	Butte	39.76168	-121.84047
08/27/2014	AQS	060070008	1	8.7	ug/m3 LC	36	Chico-East Avenue	1	100.0000	88101	PM2.5 - Local Conditions	17020	Chico, CA	06	California	007	Butte	39.76168	-121.84047
08/28/2014	AQS	060070008	1	9.1	ug/m3 LC	38	Chico-East Avenue	1	100.0000	88101	PM2.5 - Local Conditions	17020	Chico, CA	06	California	007	Butte	39.76168	-121.84047
08/29/2014	AQS	060070008	1	10.5	ug/m3 LC	44	Chico-East Avenue	1	100.0000	88101	PM2.5 - Local Conditions	17020	Chico, CA	06	California	007	Butte	39.76168	-121.84047
08/30/2014	AQS	060070008	1	7.1	ug/m3 LC	30	Chico-East Avenue	1	100.0000	88101	PM2.5 - Local Conditions	17020	Chico, CA	06	California	007	Butte	39.76168	-121.84047
08/31/2014	AQS	060070008	1	9.7	ug/m3 LC	40	Chico-East Avenue	1	100.0000	88101	PM2.5 - Local Conditions	17020	Chico, CA	06	California	007	Butte	39.76168	-121.84047
09/01/2014	AQS	060070008	1	14.1	ug/m3 LC	55	Chico-East Avenue	1	100.0000	88101	PM2.5 - Local Conditions	17020	Chico, CA	06	California	007	Butte	39.76168	-121.84047
09/02/2014	AQS	060070008	1	14	ug/m3 LC	55	Chico-East Avenue	1	100.0000	88101	PM2.5 - Local Conditions	17020	Chico, CA	06	California	007	Butte	39.76168	-121.84047
09/03/2014	AQS	060070008	1	10.2	ug/m3 LC	43	Chico-East Avenue	1	100.0000	88101	PM2.5 - Local Conditions	17020	Chico, CA	06	California	007	Butte	39.76168	-121.84047
09/04/2014	AQS	060070008	1	6.5	ug/m3 LC	27	Chico-East Avenue	1	100.0000	88101	PM2.5 - Local Conditions	17020	Chico, CA	06	California	007	Butte	39.76168	-121.84047
09/05/2014	AQS	060070008	1	17	ug/m3 LC	61	Chico-East Avenue	1	100.0000	88101	PM2.5 - Local Conditions	17020	Chico, CA	06	California	007	Butte	39.76168	-121.84047
09/06/2014	AQS	060070008	1	10.2	ug/m3 LC	43	Chico-East Avenue	1	100.0000	88101	PM2.5 - Local Conditions	17020	Chico, CA	06	California	007	Butte	39.76168	-121.84047
09/07/2014	AQS	060070008	1	9.8	ug/m3 LC	41	Chico-East Avenue	1	100.0000	88101	PM2.5 - Local Conditions	17020	Chico, CA	06	California	007	Butte	39.76168	-121.84047
09/08/2014	AQS	060070008	1	10.7	ug/m3 LC	45	Chico-East Avenue	1	100.0000	88101	PM2.5 - Local Conditions	17020	Chico, CA	06	California	007	Butte	39.76168	-121.84047
09/09/2014	AQS	060070008	1	8.5	ug/m3 LC	35	Chico-East Avenue	1	100.0000	88101	PM2.5 - Local Conditions	17020	Chico, CA	06	California	007	Butte	39.76168	-121.84047
09/10/2014	AQS	060070008	1	10.1	ug/m3 LC	42	Chico-East Avenue	1	100.0000	88101	PM2.5 - Local Conditions	17020	Chico, CA	06	California	007	Butte	39.76168	-121.84047
09/11/2014	AQS	060070008	1	11.8	ug/m3 LC	49	Chico-East Avenue	1	100.0000	88101	PM2.5 - Local Conditions	17020	Chico, CA	06	California	007	Butte	39.76168	-121.84047
09/12/2014	AQS	060070008	1	10	ug/m3 LC	42	Chico-East Avenue	1	100.0000	88101	PM2.5 - Local Conditions	17020	Chico, CA	06	California	007	Butte	39.76168	-121.84047
09/13/2014	AQS	060070008	1	7.4	ug/m3 LC	31	Chico-East Avenue	1	100.0000	88101	PM2.5 - Local Conditions	17020	Chico, CA	06	California	007	Butte	39.76168	-121.84047
09/14/2014	AQS	060070008	1	6.6	ug/m3 LC	28	Chico-East Avenue	1	100.0000	88101	PM2.5 - Local Conditions	17020	Chico, CA	06	California	007	Butte	39.76168	-121.84047
09/15/2014	AQS	060070008	1	9.4	ug/m3 LC	39	Chico-East Avenue	1	100.0000	88101	PM2.5 - Local Conditions	17020	Chico, CA	06	California	007	Butte	39.76168	-121.84047
09/16/2014	AQS	060070008	1	9.2	ug/m3 LC	38	Chico-East Avenue	1	100.0000	88101	PM2.5 - Local Conditions	17020	Chico, CA	06	California	007	Butte	39.76168	-121.84047
09/17/2014	AQS	060070008	1	7.7	ug/m3 LC	32	Chico-East Avenue	1	100.0000	88101	PM2.5 - Local Conditions	17020	Chico, CA	06	California	007	Butte	39.76168	-121.84047
09/18/2014	AQS	060070008	1	3.2	ug/m3 LC	13	Chico-East Avenue	1	100.0000	88101	PM2.5 - Local Conditions	17020	Chico, CA	06	California	007	Butte	39.76168	-121.84047
09/19/2014	AQS	060070008	1	5.9	ug/m3 LC	25	Chico-East Avenue	1	100.0000	88101	PM2.5 - Local Conditions	17020	Chico, CA	06	California	007	Butte	39.76168	-121.84047
09/20/2014	AQS	060070008	1	13.4	ug/m3 LC	54	Chico-East Avenue	1	100.0000	88101	PM2.5 - Local Conditions	17020	Chico, CA	06	California	007	Butte	39.76168	-121.84047
09/21/2014	AQS	060070008	1	9.1	ug/m3 LC	38	Chico-East Avenue	1	100.0000	88101	PM2.5 - Local Conditions	17020	Chico, CA	06	California	007	Butte	39.76168	-121.84047
09/22/2014	AQS	060070008	1	25.5	ug/m3 LC	79	Chico-East Avenue	1	100.0000	88101	PM2.5 - Local Conditions	17020	Chico, CA	06	California	007	Butte	39.76168	-121.84047
09/23/2014	AQS	060070008	1	26	ug/m3 LC	80	Chico-East Avenue	1	100.0000	88101	PM2.5 - Local Conditions	17020	Chico, CA	06	California	007	Butte	39.76168	-121.84047
09/24/2014	AQS	060070008	1	5.2	ug/m3 LC	22	Chico-East Avenue	1	100.0000	88101	PM2.5 - Local Conditions	17020	Chico, CA	06	California	007	Butte	39.76168	-121.84047
09/25/2014	AQS	060070008	1	2.6	ug/m3 LC	11	Chico-East Avenue	1	100.0000	88101	PM2.5 - Local Conditions	17020	Chico, CA	06	California	007	Butte	39.76168	-121.84047
09/26/2014	AQS	060070008	1	3.1	ug/m3 LC	13	Chico-East Avenue	1	100.0000	88101	PM2.5 - Local Conditions	17020	Chico, CA	06	California	007	Butte	39.76168	-121.84047
09/27/2014	AQS	060070008	1	4.2	ug/m3 LC	18	Chico-East Avenue	1	100.0000	88101	PM2.5 - Local Conditions	17020	Chico, CA	06	California	007	Butte	39.76168	-121.84047
09/28/2014	AQS	060070008	1	7.2	ug/m3 LC	30	Chico-East Avenue	1	100.0000	88101	PM2.5 - Local Conditions	17020	Chico, CA	06	California	007	Butte	39.76168	-121.84047
09/29/2014	AQS	060070008	1	7.2	ug/m3 LC	30	Chico-East Avenue	1	100.0000	88101	PM2.5 - Local Conditions	17020	Chico, CA	06	California	007	Butte	39.76168	-121.84047
09/30/2014	AQS	060070008	1	5.7	ug/m3 LC	24	Chico-East Avenue	1	100.0000	88101	PM2.5 - Local Conditions	17020	Chico, CA	06	California	007	Butte	39.76168	-121.84047
10/01/2014	AQS	060070008	1	2.2	ug/m3 LC	9	Chico-East Avenue	1	100.0000	88101	PM2.5 - Local Conditions	17020	Chico, CA	06	California	007	Butte	39.76168	-121.84047
10/02/2014	AQS	060070008	1	4.3	ug/m3 LC	18	Chico-East Avenue	1	100.0000	88101	PM2.5 - Local Conditions	17020	Chico, CA	06	California	007	Butte	39.76168	-121.84047
10/03/2014	AQS	060070008	1	5.8	ug/m3 LC	24	Chico-East Avenue	1	100.0000	88101	PM2.5 - Local Conditions	17020	Chico, CA	06	California	007	Butte	39.76168	-121.84047
10/04/2014	AQS	060070008	1	5.9	ug/m3 LC	25	Chico-East Avenue	1	100.0000	88101	PM2.5 - Local Conditions	17020	Chico, CA	06	California	007	Butte	39.76168	-121.84047
10/05/2014	AQS	060070008	1	6.4	ug/m3 LC	27	Chico-East Avenue	1	100.0000	88101	PM2.5 - Local Conditions	17020	Chico, CA	06	California	007	Butte	39.76168	-121.84047
10/06/2014	AQS	060070008	1	6.5	ug/m3 LC	27	Chico-East Avenue	1	100.0000	88101	PM2.5 - Local Conditions	17020	Chico, CA	06	California	007	Butte	39.76168	-121.84047
10/07/2014	AQS	060070008	1	7.6	ug/m3 LC	32	Chico-East Avenue	1	100.0000	88101	PM2.5 - Local Conditions	17020	Chico, CA	06	California	007	Butte	39.76168	-121.84047
10/08/2014	AQS	060070008	1	4.9	ug/m3 LC	20	Chico-East Avenue	1	100.0000	88101	PM2.5 - Local Conditions	17020	Chico, CA	06	California	007	Butte	39.76168	-121.84047
10/09/2014	AQS	060070008	1	7.5	ug/m3 LC	31	Chico-East Avenue	1	100.0000	88101	PM2.5 - Local Conditions	17020	Chico, CA	06	California	007	Butte	39.76168	-121.84047
10/10/2014	AQS	060070008	1	10	ug/m3 LC	42	Chico-East Avenue	1	100.0000	88101	PM2.5 - Local Conditions	17020	Chico, CA	06	California	007	Butte	39.76168	-121.84047
10/11/2014	AQS	060070008	1	8.8	ug/m3 LC	37	Chico-East Avenue	1	100.0000	88101	PM2.5 - Local Conditions	17020	Chico, CA	06	California	007	Butte	39.76168	-121.84047
10/12/2014	AQS	060070008	1	2	ug/m3 LC	8	Chico-East Avenue	1	100.0000	88101	PM2.5 - Local Conditions	17020	Chico, CA	06	California	007	Butte	39.76168	-121.84047
10/13/2014	AQS	060070008	1	10.2	ug/m3 LC	43	Chico-East Avenue	1	100.0000	88101	PM2.5 - Local Conditions	17020	Chico, CA	06	California	007	Butte	39.76168	-121.84047
10/14/2014	AQS	060070008	1	7.4	ug/m3 LC	31	Chico-East Avenue	1	100.0000	88101	PM2.5 - Local Conditions	17020	Chico, CA	06	California	007	Butte	39.76168	-121.84047
10/15/2014	AQS	060070008	1	4	ug/m3 LC	17	Chico-East Avenue	1	100.0000	88101	PM2.5 - Local Conditions	17020	Chico, CA	06	California	007	Butte	39.76168	-121.84047
10/16/2014	AQS	060070008	1	6.5	ug/m3 LC	27	Chico-East Avenue	1	100.0000	88101	PM2.5 - Local Conditions	17020	Chico, CA	06	California	007	Butte	39.76168	-121.84047
10/17/2014	AQS	060070008	1	13.1	ug/m3 LC	53	Chico-East Avenue	1	100.0000	88101	PM2.5 - Local Conditions	17020	Chico, CA	06	California	007	Butte	39.76168	-121.84047
10/18/2014	AQS	060070008	1	6.5	ug/m3 LC	27	Chico-East Avenue	1	100.0000	88101	PM2.5 - Local Conditions	17020	Chico, CA	06	California	007	Butte	39.76168	-121.84047
10/19/2014	AQS	060070008	1	9.1	ug/m3 LC	38	Chico-East Avenue	1	100.0000	88101	PM2.5 - Local Conditions	17020	Chico, CA	06	California	007	Butte	39.76168	-121.84047
10/20/2014	AQS	060070008	1	6.1	ug/m3 LC	25	Chico-East Avenue	1	100.0000	88101	PM2.5 - Local Conditions	17020	Chico, CA	06	California	007	Butte	39.76168	-121.84047
10/21/2014	AQS	060070008	1	2.5	ug/m3 LC	10	Chico-East Avenue	1	100.0000	88101	PM2.5 - Local Conditions	17020	Chico, CA	06	California	007	Butte	39.76168	-121.84047
10/22/2014	AQS	060070008	1	5	ug/m3 LC	21	Chico-East Avenue	1	100.0000	88101	PM2.5 - Local Conditions	17020	Chico, CA	06	California	007	Butte	39.76168	-121.84047
10/23/2014	AQS	060070008	1	5.6	ug/m3 LC	23	Chico-East Avenue	1	100.0000	88101	PM2.5 - Local Conditions	17020	Chico, CA	06	California	007	Butte	39.76168	-121.84047
10/24/2014	AQS	060070008	1	7.2	ug/m3 LC	30	Chico-East Avenue	1	100.0000	88101	PM2.5 - Local Conditions	17020	Chico, CA	06	California	007	Butte	39.76168	-121.84047
10/25/2014	AQS	060070008	1	3.1	ug/m3 LC	13	Chico-East Avenue	1	100.0000	88101	PM2.5 - Local Conditions	17020	Chico, CA	06	California	007	Butte	39.76168	-121.84047
10/26/2014	AQS	060070008	1	2.5	ug/m3 LC	10	Chico-East Avenue	1	100.0000	88101	PM2.5 - Local Conditions	17020	Chico, CA	06	California	007	Butte	39.76168	-121.84047
10/27/2014	AQS	060070008	1	3.3	ug/m3 LC	14	Chico-East Avenue	1	100.0000	88101	PM2.5 - Local Conditions	17020	Chico, CA	06	California	007	Butte	39.76168	-121.84047
10/28/2014	AQS	060070008	1	6.5	ug/m3 LC	27	Chico-East Avenue	1	100.0000	88101	PM2.5 - Local Conditions	17020	Chico, CA	06	California	007	Butte	39.76168	-121.84047
10/29/2014	AQS	060070008	1	7	ug/m3 LC	29	Chico-East Avenue	1	100.0000	88101	PM2.5 - Local Conditions	17020	Chico, CA	06	California	007	Butte	39.76168	-121.84047
10/30/2014	AQS	060070008	1	7.5	ug/m3 LC	31	Chico-East Avenue	1	100.0000	88101	PM2.5 - Local Conditions	17020	Chico, CA	06	California	007	Butte	39.76168	-121.84047
10/31/2014	AQS	060070008	1	4	ug/m3 LC	17	Chico-East Avenue	1	100.0000	88101	PM2.5 - Local Conditions	17020	Chico, CA	06	California	007	Butte	39.76168	-121.84047
11/01/2014	AQS	060070008	1	2.7	ug/m3 LC	11	Chico-East Avenue	1	100.0000	88101	PM2.5 - Local Conditions	17020	Chico, CA	06	California	007	Butte	39.76168	-121.84047
11/02/2014	AQS	060070008	1	5.7	ug/m3 LC	24	Chico-East Avenue	1	100.0000	88101	PM2.5 - Local Conditions	17020	Chico, CA	06	California	007	Butte	39.76168	-121.84047
11/03/2014	AQS	060070008	1	5.8	ug/m3 LC	24	Chico-East Avenue	1	100.0000	88101	PM2.5 - Local Conditions	17020	Chico, CA	06	California	007	Butte	39.76168	-121.84047
11/04/2014	AQS	060070008	1	10.2	ug/m3 LC	43	Chico-East Avenue	1	100.0000	88101	PM2.5 - Local Conditions	17020	Chico, CA	06	California	007	Butte	39.76168	-121.84047
11/05/2014	AQS	060070008	1	10.2	ug/m3 LC	43	Chico-East Avenue	1	100.0000	88101	PM2.5 - Local Conditions	17020	Chico, CA	06	California	007	Butte	39.76168	-121.84047
11/06/2014	AQS	060070008	1	13.4	ug/m3 LC	54	Chico-East Avenue	1	100.0000	88101	PM2.5 - Local Conditions	17020	Chico, CA	06	California	007	Butte	39.76168	-121.84047
11/07/2014	AQS	060070008	1	12.1	ug/m3 LC	51	Chico-East Avenue	1	100.0000	88101	PM2.5 - Local Conditions	17020	Chico, CA	06	California	007	Butte	39.76168	-121.84047
11/08/2014	AQS	060070008	1	9.9	ug/m3 LC	41	Chico-East Avenue	1	100.0000	88101	PM2.5 - Local Conditions	17020	Chico, CA	06	California	007	Butte	39.76168	-121.84047
11/09/2014	AQS	060070008	1	11.7	ug/m3 LC	49	Chico-East Avenue	1	100.0000	88101	PM2.5 - Local Conditions	17020	Chico, CA	06	California	007	Butte	39.76168	-121.84047
11/10/2014	AQS	060070008	1	9.8	ug/m3 LC	41	Chico-East Avenue	1	100.0000	88101	PM2.5 - Local Conditions	17020	Chico, CA	06	California	007	Butte	39.76168	-121.84047
11/11/2014	AQS	060070008	1	11.8	ug/m3 LC	49	Chico-East Avenue	1	100.0000	88101	PM2.5 - Local Conditions	17020	Chico, CA	06	California	007	Butte	39.76168	-121.84047
11/12/2014	AQS	060070008	1	12.5	ug/m3 LC	52	Chico-East Avenue	1	100.0000	88101	PM2.5 - Local Conditions	17020	Chico, CA	06	California	007	Butte	39.76168	-121.84047
11/13/2014	AQS	060070008	1	9.7	ug/m3 LC	40	Chico-East Avenue	1	100.0000	88101	PM2.5 - Local Conditions	17020	Chico, CA	06	California	007	Butte	39.76168	-121.84047
11/14/2014	AQS	060070008	1	10.3	ug/m3 LC	43	Chico-East Avenue	1	100.0000	88101	PM2.5 - Local Conditions	17020	Chico, CA	06	California	007	Butte	39.76168	-121.84047
11/15/2014	AQS	060070008	1	7.4	ug/m3 LC	31	Chico-East Avenue	1	100.0000	88101	PM2.5 - Local Conditions	17020	Chico, CA	06	California	007	Butte	39.76168	-121.84047
11/16/2014	AQS	060070008	1	9.5	ug/m3 LC	40	Chico-East Avenue	1	100.0000	88101	PM2.5 - Local Conditions	17020	Chico, CA	06	California	007	Butte	39.76168	-121.84047
11/17/2014	AQS	060070008	1	15.8	ug/m3 LC	59	Chico-East Avenue	1	100.0000	88101	PM2.5 - Local Conditions	17020	Chico, CA	06	California	007	Butte	39.76168	-121.84047
11/18/2014	AQS	060070008	1	25.3	ug/m3 LC	79	Chico-East Avenue	1	100.0000	88101	PM2.5 - Local Conditions	17020	Chico, CA	06	California	007	Butte	39.76168	-121.84047
11/19/2014	AQS	060070008	1	17.4	ug/m3 LC	62	Chico-East Avenue	1	100.0000	88101	PM2.5 - Local Conditions	17020	Chico, CA	06	California	007	Butte	39.76168	-121.84047
11/20/2014	AQS	060070008	1	7.3	ug/m3 LC	30	Chico-East Avenue	1	100.0000	88101	PM2.5 - Local Conditions	17020	Chico, CA	06	California	007	Butte	39.76168	-121.84047
11/22/2014	AQS	060070008	1	8.9	ug/m3 LC	37	Chico-East Avenue	1	100.0000	88101	PM2.5 - Local Conditions	17020	Chico, CA	06	California	007	Butte	39.76168	-121.84047
11/23/2014	AQS	060070008	1	18.3	ug/m3 LC	64	Chico-East Avenue	1	100.0000	88101	PM2.5 - Local Conditions	17020	Chico, CA	06	California	007	Butte	39.76168	-121.84047
11/25/2014	AQS	060070008	1	15.8	ug/m3 LC	59	Chico-East Avenue	1	100.0000	88101	PM2.5 - Local Conditions	17020	Chico, CA	06	California	007	Butte	39.76168	-121.84047
11/26/2014	AQS	060070008	1	25.3	ug/m3 LC	79	Chico-East Avenue	1	100.0000	88101	PM2.5 - Local Conditions	17020	Chico, CA	06	California	007	Butte	39.76168	-121.84047
11/27/2014	AQS	060070008	1	21.8	ug/m3 LC	71	Chico-East Avenue	1	100.0000	88101	PM2.5 - Local Conditions	17020	Chico, CA	06	California	007	Butte	39.76168	-121.84047
11/28/2014	AQS	060070008	1	27.5	ug/m3 LC	83	Chico-East Avenue	1	100.0000	88101	PM2.5 - Local Conditions	17020	Chico, CA	06	California	007	Butte	39.76168	-121.84047
11/29/2014	AQS	060070008	1	5.7	ug/m3 LC	24	Chico-East Avenue	1	100.0000	88101	PM2.5 - Local Conditions	17020	Chico, CA	06	California	007	Butte	39.76168	-121.84047
11/30/2014	AQS	060070008	1	7.8	ug/m3 LC	33	Chico-East Avenue	1	100.0000	88101	PM2.5 - Local Conditions	17020	Chico, CA	06	California	007	Butte	39.76168	-121.84047
12/01/2014	AQS	060070008	1	5.3	ug/m3 LC	22	Chico-East Avenue	1	100.0000	88101	PM2.5 - Local Conditions	17020	Chico, CA	06	California	007	Butte	39.76168	-121.84047
12/02/2014	AQS	060070008	1	9.2	ug/m3 LC	38	Chico-East Avenue	1	100.0000	88101	PM2.5 - Local Conditions	17020	Chico, CA	06	California	007	Butte	39.76168	-121.84047
12/03/2014	AQS	060070008	1	3.1	ug/m3 LC	13	Chico-East Avenue	1	100.0000	88101	PM2.5 - Local Conditions	17020	Chico, CA	06	California	007	Butte	39.76168	-121.84047
12/04/2014	AQS	060070008	1	3.6	ug/m3 LC	15	Chico-East Avenue	1	100.0000	88101	PM2.5 - Local Conditions	17020	Chico, CA	06	California	007	Butte	39.76168	-121.84047
12/05/2014	AQS	060070008	1	3.8	ug/m3 LC	16	Chico-East Avenue	1	100.0000	88101	PM2.5 - Local Conditions	17020	Chico, CA	06	California	007	Butte	39.76168	-121.84047
12/06/2014	AQS	060070008	1	6.3	ug/m3 LC	26	Chico-East Avenue	1	100.0000	88101	PM2.5 - Local Conditions	17020	Chico, CA	06	California	007	Butte	39.76168	-121.84047
12/07/2014	AQS	060070008	1	10.1	ug/m3 LC	42	Chico-East Avenue	1	100.0000	88101	PM2.5 - Local Conditions	17020	Chico, CA	06	California	007	Butte	39.76168	-121.84047
12/08/2014	AQS	060070008	1	8.6	ug/m3 LC	36	Chico-East Avenue	1	100.0000	88101	PM2.5 - Local Conditions	17020	Chico, CA	06	California	007	Butte	39.76168	-121.84047
12/09/2014	AQS	060070008	1	13.7	ug/m3 LC	54	Chico-East Avenue	1	100.0000	88101	PM2.5 - Local Conditions	17020	Chico, CA	06	California	007	Butte	39.76168	-121.84047
12/10/2014	AQS	060070008	1	13.5	ug/m3 LC	54	Chico-East Avenue	1	100.0000	88101	PM2.5 - Local Conditions	17020	Chico, CA	06	California	007	Butte	39.76168	-121.84047
12/11/2014	AQS	060070008	1	4.4	ug/m3 LC	18	Chico-East Avenue	1	100.0000	88101	PM2.5 - Local Conditions	17020	Chico, CA	06	California	007	Butte	39.76168	-121.84047
12/12/2014	AQS	060070008	1	6.3	ug/m3 LC	26	Chico-East Avenue	1	100.0000	88101	PM2.5 - Local Conditions	17020	Chico, CA	06	California	007	Butte	39.76168	-121.84047
12/13/2014	AQS	060070008	1	8.3	ug/m3 LC	35	Chico-East Avenue	1	100.0000	88101	PM2.5 - Local Conditions	17020	Chico, CA	06	California	007	Butte	39.76168	-121.84047
12/14/2014	AQS	060070008	1	15	ug/m3 LC	57	Chico-East Avenue	1	100.0000	88101	PM2.5 - Local Conditions	17020	Chico, CA	06	California	007	Butte	39.76168	-121.84047
12/15/2014	AQS	060070008	1	5.7	ug/m3 LC	24	Chico-East Avenue	1	100.0000	88101	PM2.5 - Local Conditions	17020	Chico, CA	06	California	007	Butte	39.76168	-121.84047
12/16/2014	AQS	060070008	1	2.4	ug/m3 LC	10	Chico-East Avenue	1	100.0000	88101	PM2.5 - Local Conditions	17020	Chico, CA	06	California	007	Butte	39.76168	-121.84047
12/17/2014	AQS	060070008	1	2.5	ug/m3 LC	10	Chico-East Avenue	1	100.0000	88101	PM2.5 - Local Conditions	17020	Chico, CA	06	California	007	Butte	39.76168	-121.84047
12/18/2014	AQS	060070008	1	5	ug/m3 LC	21	Chico-East Avenue	1	100.0000	88101	PM2.5 - Local Conditions	17020	Chico, CA	06	California	007	Butte	39.76168	-121.84047
12/19/2014	AQS	060070008	1	2.8	ug/m3 LC	12	Chico-East Avenue	1	100.0000	88101	PM2.5 - Local Conditions	17020	Chico, CA	06	California	007	Butte	39.76168	-121.84047
12/20/2014	AQS	060070008	1	1	ug/m3 LC	4	Chico-East Avenue	1	100.0000	88101	PM2.5 - Local Conditions	17020	Chico, CA	06	California	007	Butte	39.76168	-121.84047
12/21/2014	AQS	060070008	1	3.5	ug/m3 LC	15	Chico-East Avenue	1	100.0000	88101	PM2.5 - Local Conditions	17020	Chico, CA	06	California	007	Butte	39.76168	-121.84047
12/22/2014	AQS	060070008	1	7.6	ug/m3 LC	32	Chico-East Avenue	1	100.0000	88101	PM2.5 - Local Conditions	17020	Chico, CA	06	California	007	Butte	39.76168	-121.84047
12/23/2014	AQS	060070008	1	12.9	ug/m3 LC	53	Chico-East Avenue	1	100.0000	88101	PM2.5 - Local Conditions	17020	Chico, CA	06	California	007	Butte	39.76168	-121.84047
12/24/2014	AQS	060070008	1	12.8	ug/m3 LC	52	Chico-East Avenue	1	100.0000	88101	PM2.5 - Local Conditions	17020	Chico, CA	06	California	007	Butte	39.76168	-121.84047
12/25/2014	AQS	060070008	1	6.3	ug/m3 LC	26	Chico-East Avenue	1	100.0000	88101	PM2.5 - Local Conditions	17020	Chico, CA	06	California	007	Butte	39.76168	-121.84047
12/26/2014	AQS	060070008	1	12.8	ug/m3 LC	52	Chico-East Avenue	1	100.0000	88101	PM2.5 - Local Conditions	17020	Chico, CA	06	California	007	Butte	39.76168	-121.84047
12/27/2014	AQS	060070008	1	19.1	ug/m3 LC	66	Chico-East Avenue	1	100.0000	88101	PM2.5 - Local Conditions	17020	Chico, CA	06	California	007	Butte	39.76168	-121.84047
12/28/2014	AQS	060070008	1	21.7	ug/m3 LC	71	Chico-East Avenue	1	100.0000	88101	PM2.5 - Local Conditions	17020	Chico, CA	06	California	007	Butte	39.76168	-121.84047
12/29/2014	AQS	060070008	1	24.8	ug/m3 LC	78	Chico-East Avenue	1	100.0000	88101	PM2.5 - Local Conditions	17020	Chico, CA	06	California	007	Butte	39.76168	-121.84047
12/30/2014	AQS	060070008	1	3.6	ug/m3 LC	15	Chico-East Avenue	1	100.0000	88101	PM2.5 - Local Conditions	17020	Chico, CA	06	California	007	Butte	39.76168	-121.84047
12/31/2014	AQS	060070008	1	14.7	ug/m3 LC	56	Chico-East Avenue	1	100.0000	88101	PM2.5 - Local Conditions	17020	Chico, CA	06	California	007	Butte	39.76168	-121.84047
01/01/2014	AQS	060070008	3	62.8	ug/m3 LC	155	Chico-East Avenue	1	100.0000	88502	Acceptable PM2.5 AQI & Speciation Mass	17020	Chico, CA	06	California	007	Butte	39.76168	-121.84047
01/02/2014	AQS	060070008	3	24.7	ug/m3 LC	77	Chico-East Avenue	1	100.0000	88502	Acceptable PM2.5 AQI & Speciation Mass	17020	Chico, CA	06	California	007	Butte	39.76168	-121.84047
01/03/2014	AQS	060070008	3	33.5	ug/m3 LC	96	Chico-East Avenue	1	100.0000	88502	Acceptable PM2.5 AQI & Speciation Mass	17020	Chico, CA	06	California	007	Butte	39.76168	-121.84047
01/04/2014	AQS	060070008	3	30.6	ug/m3 LC	90	Chico-East Avenue	1	100.0000	88502	Acceptable PM2.5 AQI & Speciation Mass	17020	Chico, CA	06	California	007	Butte	39.76168	-121.84047
01/05/2014	AQS	060070008	3	24.8	ug/m3 LC	78	Chico-East Avenue	1	100.0000	88502	Acceptable PM2.5 AQI & Speciation Mass	17020	Chico, CA	06	California	007	Butte	39.76168	-121.84047
01/06/2014	AQS	060070008	3	35.1	ug/m3 LC	99	Chico-East Avenue	1	100.0000	88502	Acceptable PM2.5 AQI & Speciation Mass	17020	Chico, CA	06	California	007	Butte	39.76168	-121.84047
01/07/2014	AQS	060070008	3	25.9	ug/m3 LC	80	Chico-East Avenue	1	100.0000	88502	Acceptable PM2.5 AQI & Speciation Mass	17020	Chico, CA	06	California	007	Butte	39.76168	-121.84047
01/08/2014	AQS	060070008	3	29.9	ug/m3 LC	88	Chico-East Avenue	1	100.0000	88502	Acceptable PM2.5 AQI & Speciation Mass	17020	Chico, CA	06	California	007	Butte	39.76168	-121.84047
01/09/2014	AQS	060070008	3	22.9	ug/m3 LC	74	Chico-East Avenue	1	100.0000	88502	Acceptable PM2.5 AQI & Speciation Mass	17020	Chico, CA	06	California	007	Butte	39.76168	-121.84047
01/10/2014	AQS	060070008	3	23.8	ug/m3 LC	76	Chico-East Avenue	1	100.0000	88502	Acceptable PM2.5 AQI & Speciation Mass	17020	Chico, CA	06	California	007	Butte	39.76168	-121.84047
01/11/2014	AQS	060070008	3	17.2	ug/m3 LC	62	Chico-East Avenue	1	100.0000	88502	Acceptable PM2.5 AQI & Speciation Mass	17020	Chico, CA	06	California	007	Butte	39.76168	-121.84047
01/12/2014	AQS	060070008	3	4.7	ug/m3 LC	20	Chico-East Avenue	1	100.0000	88502	Acceptable PM2.5 AQI & Speciation Mass	17020	Chico, CA	06	California	007	Butte	39.76168	-121.84047
01/13/2014	AQS	060070008	3	11.3	ug/m3 LC	47	Chico-East Avenue	1	100.0000	88502	Acceptable PM2.5 AQI & Speciation Mass	17020	Chico, CA	06	California	007	Butte	39.76168	-121.84047
01/14/2014	AQS	060070008	3	17.2	ug/m3 LC	62	Chico-East Avenue	1	100.0000	88502	Acceptable PM2.5 AQI & Speciation Mass	17020	Chico, CA	06	California	007	Butte	39.76168	-121.84047
01/15/2014	AQS	060070008	3	15.5	ug/m3 LC	58	Chico-East Avenue	1	100.0000	88502	Acceptable PM2.5 AQI & Speciation Mass	17020	Chico, CA	06	California	007	Butte	39.76168	-121.84047
01/16/2014	AQS	060070008	3	14.8	ug/m3 LC	57	Chico-East Avenue	1	100.0000	88502	Acceptable PM2.5 AQI & Speciation Mass	17020	Chico, CA	06	California	007	Butte	39.76168	-121.84047
01/17/2014	AQS	060070008	3	22.1	ug/m3 LC	72	Chico-East Avenue	1	100.0000	88502	Acceptable PM2.5 AQI & Speciation Mass	17020	Chico, CA	06	California	007	Butte	39.76168	-121.84047
01/18/2014	AQS	060070008	3	16.5	ug/m3 LC	60	Chico-East Avenue	1	100.0000	88502	Acceptable PM2.5 AQI & Speciation Mass	17020	Chico, CA	06	California	007	Butte	39.76168	-121.84047
01/19/2014	AQS	060070008	3	18.9	ug/m3 LC	65	Chico-East Avenue	1	100.0000	88502	Acceptable PM2.5 AQI & Speciation Mass	17020	Chico, CA	06	California	007	Butte	39.76168	-121.84047
01/20/2014	AQS	060070008	3	17.2	ug/m3 LC	62	Chico-East Avenue	1	100.0000	88502	Acceptable PM2.5 AQI & Speciation Mass	17020	Chico, CA	06	California	007	Butte	39.76168	-121.84047
01/21/2014	AQS	060070008	3	14.2	ug/m3 LC	55	Chico-East Avenue	1	100.0000	88502	Acceptable PM2.5 AQI & Speciation Mass	17020	Chico, CA	06	California	007	Butte	39.76168	-121.84047
01/22/2014	AQS	060070008	3	17.6	ug/m3 LC	63	Chico-East Avenue	1	100.0000	88502	Acceptable PM2.5 AQI & Speciation Mass	17020	Chico, CA	06	California	007	Butte	39.76168	-121.84047
01/23/2014	AQS	060070008	3	4.6	ug/m3 LC	19	Chico-East Avenue	1	100.0000	88502	Acceptable PM2.5 AQI & Speciation Mass	17020	Chico, CA	06	California	007	Butte	39.76168	-121.84047
01/24/2014	AQS	060070008	3	14.2	ug/m3 LC	55	Chico-East Avenue	1	100.0000	88502	Acceptable PM2.5 AQI & Speciation Mass	17020	Chico, CA	06	California	007	Butte	39.76168	-121.84047
01/25/2014	AQS	060070008	3	13.4	ug/m3 LC	54	Chico-East Avenue	1	100.0000	88502	Acceptable PM2.5 AQI & Speciation Mass	17020	Chico, CA	06	California	007	Butte	39.76168	-121.84047
01/26/2014	AQS	060070008	3	13	ug/m3 LC	53	Chico-East Avenue	1	100.0000	88502	Acceptable PM2.5 AQI & Speciation Mass	17020	Chico, CA	06	California	007	Butte	39.76168	-121.84047
01/27/2014	AQS	060070008	3	19.6	ug/m3 LC	67	Chico-East Avenue	1	100.0000	88502	Acceptable PM2.5 AQI & Speciation Mass	17020	Chico, CA	06	California	007	Butte	39.76168	-121.84047
01/28/2014	AQS	060070008	3	23.7	ug/m3 LC	75	Chico-East Avenue	1	100.0000	88502	Acceptable PM2.5 AQI & Speciation Mass	17020	Chico, CA	06	California	007	Butte	39.76168	-121.84047
01/29/2014	AQS	060070008	3	13.9	ug/m3 LC	55	Chico-East Avenue	1	100.0000	88502	Acceptable PM2.5 AQI & Speciation Mass	17020	Chico, CA	06	California	007	Butte	39.76168	-121.84047
01/30/2014	AQS	060070008	3	15.6	ug/m3 LC	58	Chico-East Avenue	1	100.0000	88502	Acceptable PM2.5 AQI & Speciation Mass	17020	Chico, CA	06	California	007	Butte	39.76168	-121.84047
01/31/2014	AQS	060070008	3	5.9	ug/m3 LC	25	Chico-East Avenue	1	100.0000	88502	Acceptable PM2.5 AQI & Speciation Mass	17020	Chico, CA	06	California	007	Butte	39.76168	-121.84047
02/01/2014	AQS	060070008	3	6.3	ug/m3 LC	26	Chico-East Avenue	1	100.0000	88502	Acceptable PM2.5 AQI & Speciation Mass	17020	Chico, CA	06	California	007	Butte	39.76168	-121.84047
02/02/2014	AQS	060070008	3	9.2	ug/m3 LC	38	Chico-East Avenue	1	100.0000	88502	Acceptable PM2.5 AQI & Speciation Mass	17020	Chico, CA	06	California	007	Butte	39.76168	-121.84047
02/03/2014	AQS	060070008	3	11.6	ug/m3 LC	48	Chico-East Avenue	1	100.0000	88502	Acceptable PM2.5 AQI & Speciation Mass	17020	Chico, CA	06	California	007	Butte	39.76168	-121.84047
02/04/2014	AQS	060070008	3	16.6	ug/m3 LC	60	Chico-East Avenue	1	100.0000	88502	Acceptable PM2.5 AQI & Speciation Mass	17020	Chico, CA	06	California	007	Butte	39.76168	-121.84047
02/05/2014	AQS	060070008	3	16.6	ug/m3 LC	60	Chico-East Avenue	1	100.0000	88502	Acceptable PM2.5 AQI & Speciation Mass	17020	Chico, CA	06	California	007	Butte	39.76168	-121.84047
02/06/2014	AQS	060070008	3	6.6	ug/m3 LC	28	Chico-East Avenue	1	100.0000	88502	Acceptable PM2.5 AQI & Speciation Mass	17020	Chico, CA	06	California	007	Butte	39.76168	-121.84047
02/07/2014	AQS	060070008	3	7.2	ug/m3 LC	30	Chico-East Avenue	1	100.0000	88502	Acceptable PM2.5 AQI & Speciation Mass	17020	Chico, CA	06	California	007	Butte	39.76168	-121.84047
02/08/2014	AQS	060070008	3	3.2	ug/m3 LC	13	Chico-East Avenue	1	100.0000	88502	Acceptable PM2.5 AQI & Speciation Mass	17020	Chico, CA	06	California	007	Butte	39.76168	-121.84047
02/09/2014	AQS	060070008	3	3	ug/m3 LC	13	Chico-East Avenue	1	100.0000	88502	Acceptable PM2.5 AQI & Speciation Mass	17020	Chico, CA	06	California	007	Butte	39.76168	-121.84047
02/10/2014	AQS	060070008	3	3.9	ug/m3 LC	16	Chico-East Avenue	1	100.0000	88502	Acceptable PM2.5 AQI & Speciation Mass	17020	Chico, CA	06	California	007	Butte	39.76168	-121.84047
02/11/2014	AQS	060070008	3	7.2	ug/m3 LC	30	Chico-East Avenue	1	100.0000	88502	Acceptable PM2.5 AQI & Speciation Mass	17020	Chico, CA	06	California	007	Butte	39.76168	-121.84047
02/12/2014	AQS	060070008	3	10.6	ug/m3 LC	44	Chico-East Avenue	1	100.0000	88502	Acceptable PM2.5 AQI & Speciation Mass	17020	Chico, CA	06	California	007	Butte	39.76168	-121.84047
02/13/2014	AQS	060070008	3	10.6	ug/m3 LC	44	Chico-East Avenue	1	100.0000	88502	Acceptable PM2.5 AQI & Speciation Mass	17020	Chico, CA	06	California	007	Butte	39.76168	-121.84047
02/14/2014	AQS	060070008	3	4.5	ug/m3 LC	19	Chico-East Avenue	1	100.0000	88502	Acceptable PM2.5 AQI & Speciation Mass	17020	Chico, CA	06	California	007	Butte	39.76168	-121.84047
02/15/2014	AQS	060070008	3	5.5	ug/m3 LC	23	Chico-East Avenue	1	100.0000	88502	Acceptable PM2.5 AQI & Speciation Mass	17020	Chico, CA	06	California	007	Butte	39.76168	-121.84047
02/16/2014	AQS	060070008	3	5.5	ug/m3 LC	23	Chico-East Avenue	1	100.0000	88502	Acceptable PM2.5 AQI & Speciation Mass	17020	Chico, CA	06	California	007	Butte	39.76168	-121.84047
02/17/2014	AQS	060070008	3	9.6	ug/m3 LC	40	Chico-East Avenue	1	100.0000	88502	Acceptable PM2.5 AQI & Speciation Mass	17020	Chico, CA	06	California	007	Butte	39.76168	-121.84047
02/18/2014	AQS	060070008	3	9	ug/m3 LC	38	Chico-East Avenue	1	100.0000	88502	Acceptable PM2.5 AQI & Speciation Mass	17020	Chico, CA	06	California	007	Butte	39.76168	-121.84047
02/19/2014	AQS	060070008	3	4.4	ug/m3 LC	18	Chico-East Avenue	1	100.0000	88502	Acceptable PM2.5 AQI & Speciation Mass	17020	Chico, CA	06	California	007	Butte	39.76168	-121.84047
02/20/2014	AQS	060070008	3	6.3	ug/m3 LC	26	Chico-East Avenue	1	100.0000	88502	Acceptable PM2.5 AQI & Speciation Mass	17020	Chico, CA	06	California	007	Butte	39.76168	-121.84047
02/21/2014	AQS	060070008	3	10	ug/m3 LC	42	Chico-East Avenue	1	100.0000	88502	Acceptable PM2.5 AQI & Speciation Mass	17020	Chico, CA	06	California	007	Butte	39.76168	-121.84047
02/22/2014	AQS	060070008	3	9.3	ug/m3 LC	39	Chico-East Avenue	1	100.0000	88502	Acceptable PM2.5 AQI & Speciation Mass	17020	Chico, CA	06	California	007	Butte	39.76168	-121.84047
02/23/2014	AQS	060070008	3	8.1	ug/m3 LC	34	Chico-East Avenue	1	100.0000	88502	Acceptable PM2.5 AQI & Speciation Mass	17020	Chico, CA	06	California	007	Butte	39.76168	-121.84047
02/24/2014	AQS	060070008	3	5.8	ug/m3 LC	24	Chico-East Avenue	1	100.0000	88502	Acceptable PM2.5 AQI & Speciation Mass	17020	Chico, CA	06	California	007	Butte	39.76168	-121.84047
02/25/2014	AQS	060070008	3	10.5	ug/m3 LC	44	Chico-East Avenue	1	100.0000	88502	Acceptable PM2.5 AQI & Speciation Mass	17020	Chico, CA	06	California	007	Butte	39.76168	-121.84047
02/26/2014	AQS	060070008	3	9.5	ug/m3 LC	40	Chico-East Avenue	1	100.0000	88502	Acceptable PM2.5 AQI & Speciation Mass	17020	Chico, CA	06	California	007	Butte	39.76168	-121.84047
02/27/2014	AQS	060070008	3	2.5	ug/m3 LC	10	Chico-East Avenue	1	100.0000	88502	Acceptable PM2.5 AQI & Speciation Mass	17020	Chico, CA	06	California	007	Butte	39.76168	-121.84047
02/28/2014	AQS	060070008	3	3.3	ug/m3 LC	14	Chico-East Avenue	1	100.0000	88502	Acceptable PM2.5 AQI & Speciation Mass	17020	Chico, CA	06	California	007	Butte	39.76168	-121.84047
03/01/2014	AQS	060070008	3	0.8	ug/m3 LC	3	Chico-East Avenue	1	100.0000	88502	Acceptable PM2.5 AQI & Speciation Mass	17020	Chico, CA	06	California	007	Butte	39.76168	-121.84047
03/02/2014	AQS	060070008	3	5.6	ug/m3 LC	23	Chico-East Avenue	1	100.0000	88502	Acceptable PM2.5 AQI & Speciation Mass	17020	Chico, CA	06	California	007	Butte	39.76168	-121.84047
03/03/2014	AQS	060070008	3	2.1	ug/m3 LC	9	Chico-East Avenue	1	100.0000	88502	Acceptable PM2.5 AQI & Speciation Mass	17020	Chico, CA	06	California	007	Butte	39.76168	-121.84047
03/04/2014	AQS	060070008	3	1.2	ug/m3 LC	5	Chico-East Avenue	1	100.0000	88502	Acceptable PM2.5 AQI & Speciation Mass	17020	Chico, CA	06	California	007	Butte	39.76168	-121.84047
03/05/2014	AQS	060070008	3	2.3	ug/m3 LC	10	Chico-East Avenue	1	100.0000	88502	Acceptable PM2.5 AQI & Speciation Mass	17020	Chico, CA	06	California	007	Butte	39.76168	-121.84047
03/06/2014	AQS	060070008	3	0.6	ug/m3 LC	3	Chico-East Avenue	1	100.0000	88502	Acceptable PM2.5 AQI & Speciation Mass	17020	Chico, CA	06	California	007	Butte	39.76168	-121.84047
03/07/2014	AQS	060070008	3	5.8	ug/m3 LC	24	Chico-East Avenue	1	100.0000	88502	Acceptable PM2.5 AQI & Speciation Mass	17020	Chico, CA	06	California	007	Butte	39.76168	-121.84047
03/08/2014	AQS	060070008	3	9.6	ug/m3 LC	40	Chico-East Avenue	1	100.0000	88502	Acceptable PM2.5 AQI & Speciation Mass	17020	Chico, CA	06	California	007	Butte	39.76168	-121.84047
03/09/2014	AQS	060070008	3	6.6	ug/m3 LC	28	Chico-East Avenue	1	100.0000	88502	Acceptable PM2.5 AQI & Speciation Mass	17020	Chico, CA	06	California	007	Butte	39.76168	-121.84047
03/10/2014	AQS	060070008	3	2.3	ug/m3 LC	10	Chico-East Avenue	1	100.0000	88502	Acceptable PM2.5 AQI & Speciation Mass	17020	Chico, CA	06	California	007	Butte	39.76168	-121.84047
03/11/2014	AQS	060070008	3	2.7	ug/m3 LC	11	Chico-East Avenue	1	100.0000	88502	Acceptable PM2.5 AQI & Speciation Mass	17020	Chico, CA	06	California	007	Butte	39.76168	-121.84047
03/12/2014	AQS	060070008	3	2.8	ug/m3 LC	12	Chico-East Avenue	1	100.0000	88502	Acceptable PM2.5 AQI & Speciation Mass	17020	Chico, CA	06	California	007	Butte	39.76168	-121.84047
03/13/2014	AQS	060070008	3	2.1	ug/m3 LC	9	Chico-East Avenue	1	100.0000	88502	Acceptable PM2.5 AQI & Speciation Mass	17020	Chico, CA	06	California	007	Butte	39.76168	-121.84047
03/14/2014	AQS	060070008	3	4.2	ug/m3 LC	18	Chico-East Avenue	1	100.0000	88502	Acceptable PM2.5 AQI & Speciation Mass	17020	Chico, CA	06	California	007	Butte	39.76168	-121.84047
03/15/2014	AQS	060070008	3	4.3	ug/m3 LC	18	Chico-East Avenue	1	100.0000	88502	Acceptable PM2.5 AQI & Speciation Mass	17020	Chico, CA	06	California	007	Butte	39.76168	-121.84047
03/16/2014	AQS	060070008	3	9.5	ug/m3 LC	40	Chico-East Avenue	1	100.0000	88502	Acceptable PM2.5 AQI & Speciation Mass	17020	Chico, CA	06	California	007	Butte	39.76168	-121.84047
03/17/2014	AQS	060070008	3	3.7	ug/m3 LC	15	Chico-East Avenue	1	100.0000	88502	Acceptable PM2.5 AQI & Speciation Mass	17020	Chico, CA	06	California	007	Butte	39.76168	-121.84047
03/18/2014	AQS	060070008	3	1.3	ug/m3 LC	5	Chico-East Avenue	1	100.0000	88502	Acceptable PM2.5 AQI & Speciation Mass	17020	Chico, CA	06	California	007	Butte	39.76168	-121.84047
03/19/2014	AQS	060070008	3	7.7	ug/m3 LC	32	Chico-East Avenue	1	100.0000	88502	Acceptable PM2.5 AQI & Speciation Mass	17020	Chico, CA	06	California	007	Butte	39.76168	-121.84047
03/20/2014	AQS	060070008	3	3.3	ug/m3 LC	14	Chico-East Avenue	1	100.0000	88502	Acceptable PM2.5 AQI & Speciation Mass	17020	Chico, CA	06	California	007	Butte	39.76168	-121.84047
03/21/2014	AQS	060070008	3	4.5	ug/m3 LC	19	Chico-East Avenue	1	100.0000	88502	Acceptable PM2.5 AQI & Speciation Mass	17020	Chico, CA	06	California	007	Butte	39.76168	-121.84047
03/22/2014	AQS	060070008	3	5.5	ug/m3 LC	23	Chico-East Avenue	1	100.0000	88502	Acceptable PM2.5 AQI & Speciation Mass	17020	Chico, CA	06	California	007	Butte	39.76168	-121.84047
03/23/2014	AQS	060070008	3	8.5	ug/m3 LC	35	Chico-East Avenue	1	100.0000	88502	Acceptable PM2.5 AQI & Speciation Mass	17020	Chico, CA	06	California	007	Butte	39.76168	-121.84047
03/24/2014	AQS	060070008	3	11.6	ug/m3 LC	48	Chico-East Avenue	1	100.0000	88502	Acceptable PM2.5 AQI & Speciation Mass	17020	Chico, CA	06	California	007	Butte	39.76168	-121.84047
03/25/2014	AQS	060070008	3	8	ug/m3 LC	33	Chico-East Avenue	1	100.0000	88502	Acceptable PM2.5 AQI & Speciation Mass	17020	Chico, CA	06	California	007	Butte	39.76168	-121.84047
03/26/2014	AQS	060070008	3	5.2	ug/m3 LC	22	Chico-East Avenue	1	100.0000	88502	Acceptable PM2.5 AQI & Speciation Mass	17020	Chico, CA	06	California	007	Butte	39.76168	-121.84047
[truncated: 43,586 more rows]
