# Supplementary material for: Association of temporary Environmental Protection Agency regulation suspension with industrial economic viability and local air quality in California, United States
Source: Environ Sci Eur. 2021 Apr 21;33(1):52. doi: 10.1186/s12302-021-00489-9 (PMC8058586; doi:10.1186/s12302-021-00489-9)
Supplement: Supplementary file 23 — Additional file 23. updatedMiningData.csv [file 12302_2021_489_MOESM23_ESM.csv]

	Date	Automotive_Employment	Construction_Employment	Mining_Employment	Paper_Employment	Wood_Employment	Oil_Employment	Treatment_Sum	Control_Sum
1	2020-01-01	52600	861500	5900	20900	25400	4702	971002	15873221
2	2020-01-08	50682	825617.1753	5765.551758	20186.64551	24960.68115	4785	931997.053718	15976665.946282
3	2020-01-15	50785	829881.6406	5755.46875	20144.53125	24958.98437	4799	936324.62497	15951767.37503
4	2020-01-22	51818	851839.1235	5814.038086	20431.4209	25160.75439	4762	959825.336876	15968944.663124
5	2020-01-29	53000	875700	5900	20800	25400	4690	985490	15891208
6	2020-02-05	53823	891461.6577	5984.790039	21085.96191	25400	4599	1002354.409649	15903528.590351
7	2020-02-12	54010	894030.8594	6050.78125	21196.09375	25570.00732	4500	1005357.74172	15884376.25828
8	2020-02-19	53479	882346.106	6089.526367	21096.3623	25614.45313	4404	993029.447797	15922757.552203
9	2020-02-26	52300	858500	6100	20800	25518.51807	4320	967538.51807	15927512.48193
10	2020-03-04	50654	858500	6086.84082	20355.59082	25300	4252	965148.43164	15921026.56836
11	2020-03-11	48798	826861.6089	6058.59375	19835.15625	25000.42725	4206	930759.78615	15982935.21385
12	2020-03-18	47019	793198.8281	6025.952148	19322.24121	24676.17187	4182	894424.193328	15948702.806672
13	2020-03-25	45600	763800.7446	6000	18900	24389.56299	4180	862870.30759	16001603.69241
14	2020-04-01	45600	744600	5990.454102	18639.28223	24200	4198	843227.736332	15345050.263668
15	2020-04-08	44777	740295.1538	6003.90625	18586.71875	24155.06592	4230	838047.84472	15062008.15528
16	2020-04-15	44698	753473.0469	6042.06543	18752.80762	24281.64062	4271	851518.56057	14056033.43943
17	2020-04-22	45386	783731.1646	6100	18928.8	24577.01416	4310	883032.97876	14559402.02124
18	2020-04-29	46700	826800	6164.379883	19100	25000	4337	928101.379883	11593547.620117
19	2020-05-06	46700	826800	6211.71875	19530.78613	25462.04834	4336	929040.55322	13550765.44678
20	2020-05-13	48289	873665.4175	6206.616211	19530	25818.35937	4337	977846.393081	12787010.606919
21	2020-05-20	49560	909691.0156	6159	19875	25858.99658	4297	1015441.01218	14159258.98782
22	2020-05-27	49632	913740.4907	6089	19881	25300	4297	1018939.4907	13558669.5093
23	2020-06-03	47300	857300	6100	19200	25300	4198	959398	13558128
