# Supplementary material for: Association of temporary Environmental Protection Agency regulation suspension with industrial economic viability and local air quality in California, United States
Source: Environ Sci Eur. 2021 Apr 21;33(1):52. doi: 10.1186/s12302-021-00489-9 (PMC8058586; doi:10.1186/s12302-021-00489-9)
Supplement: Supplementary file 24 — Additional file 24. updatedOilData.csv [file 12302_2021_489_MOESM24_ESM.csv]

Date	No. of Employed
2020-01-01	52600
2020-01-08	50682
2020-01-15	50785
2020-01-22	51818
2020-01-29	53000
2020-02-05	53823
2020-02-12	54010
2020-02-19	53479
2020-02-26	52300
2020-03-04	50654
2020-03-11	48798
2020-03-18	47019
2020-03-25	45600
2020-04-01	45600
2020-04-08	44777
2020-04-15	44698
2020-04-22	45386
2020-04-29	46700
2020-05-06	46700
2020-05-13	48289
2020-05-20	49560
2020-05-27	49632
2020-06-03	47300
2020-06-10	46700
2020-06-17	48289
2020-06-24	49560
